# Supplementary material for: AMP-Activated Protein Kinase Regulates the Cell Surface Proteome and Integrin Membrane Traffic
Source: PubMed Central journal article supplement (PMC4444004; doi:10.1371/journal.pone.0128013), 2015-05-26
Supplement: pone.0128013.s002.pdf [file pone.0128013.s002.pdf]

**SUPPLEMENTAL TABLE 2**

Ross et al. 2015

| Gene sym. | Protein description                   | Mean Fragment intensity value |                         |                   |
|-----------|---------------------------------------|-------------------------------|-------------------------|-------------------|
|           |                                       | <i>Basal</i>                  | <i>A-769662 treated</i> | <i>Background</i> |
| FAT1      | FAT tumor suppressor 1                | 0.728 ± 0.024                 | n.d.                    | n.d.              |
| FAT2      | FAT tumor suppressor 2                | 0.795 ± 0.035                 | n.d.                    | n.d.              |
| COL6A3    | collagen, type VI, alpha 3            | 0.855 ± 0.009                 | n.d.                    | n.d.              |
| COL14A1   | collagen, type XIV, alpha 1           | 0.856 ± 0.028                 | n.d.                    | n.d.              |
| ITGA11    | integrin, alpha 11                    | 0.869 ± 0.013                 | n.d.                    | n.d.              |
| ITGA4     | integrin, alpha 4                     | 0.938 ± 0.041                 | n.d.                    | n.d.              |
| ICAM5     | intercellular adhesion molecule 5     | 0.860 ± 0.011                 | n.d.                    | n.d.              |
| MYH13     | Myosin heavy chain 13                 | n.d.                          | 0.772 ± 0.022           | n.d.              |
| PDZD2     | PDZ domain containing 2               | n.d.                          | 0.731 ± 0.037           | n.d.              |
| DNAH5     | Dynein heavy chain 5                  | 0.547 ± 0.030                 | 0.710 ± 0.037           | n.d.              |
| VAC14     | ArPIKfyve                             | 1.295 ± 0.029                 | 1.047 ± 0.017           | n.d.              |
| TLN1      | Talin 1                               | 0.694 ± 0.013                 | 1.235 ± 0.048           | 0.887 ± 0.012     |
| MCAF1     | Act. Trans. Fact. 7 Interact. Protein | 0.661 ± 0.005                 | 0.647 ± 0.006           | 0.642 ± 0.004     |
