# Supplementary material for: AMP-Activated Protein Kinase Regulates the Cell Surface Proteome and Integrin Membrane Traffic
Source: PubMed Central journal article supplement (PMC4444004; doi:10.1371/journal.pone.0128013), 2015-05-26
Supplement: pone.0128013.s003.pdf [file pone.0128013.s003.pdf]

### SUPPLEMENTAL TABLE 3

Ross et al. 2015

| <b>Treatment condition</b> | <b>Mean log intensity</b> |
|----------------------------|---------------------------|
| <i>Parent ions</i>         |                           |
| Basal                      | 3.728 ± 0.029             |
| A-769662 treated           | 3.800 ± 0.037             |
| Background                 | 3.938 ± 0.026             |
| <i>MS/MS fragments</i>     |                           |
| Basal                      | 0.712 ± 0.004             |
| A-769662 treated           | 0.721 ± 0.005             |
| Background                 | 0.673 ± 0.004             |
