# Supplementary material for: AMP-Activated Protein Kinase Regulates the Cell Surface Proteome and Integrin Membrane Traffic
Source: PLoS One. 2015 May 26;10(5):e0128013. doi: 10.1371/journal.pone.0128013 (PMC4444004; doi:10.1371/journal.pone.0128013)
Supplement: S1 Table — Shown is the complete list of proteins identified as (i) depleted from the cell surface upon A-769662 treatment, (ii) enriched at the cell surface by A-769662 treatment and (iii) largely unchanged at the cell surface by A-769662. (shown in attached. xls document) (XLSX) [file pone.0128013.s001.xlsx]

## Sheet: depleted at c.s. by A-769662
GeneSymbol	Total Protein Identification count (peptides)	total basal peptide identification	total A-769662-treated peptide identifications	total background peptide identifications	Protein description
AAK1	6	6	0	0	AP2-associated protein kinase 1 (AAK1)
ABCF2	5	5	0	0	ATP-binding cassette sub-family F member 2 isoform a (ABCF2)
ABO	5	5	0	0
ACAT1	4	4	0	0	Acetyl-CoA Acetyltransferase 1 (ACAT1)
ACD	4	4	0	0	Adrenocortical dysplasia protein (ACD)
ACSL6	5	5	0	0	Acyl-CoA synthetase long-chain family member 6 (ACSL6)
ADAMTS20	5	5	0	0	ADAM metallopeptidase with thrombospondin type 1 motif 20 (ADAMTS20)
ADAMTS7	7	7	0	0	ADAM metallopeptidase with thrombospondin type 1 motif 7 (ADAMTS17)
ADCY6	25	25	0	0	Adenylate cyclase type 6 (ADCY6)
ADRA2A	6	6	0	0	Adrenoceptor alpha 2A (ADRA2A)
AFF3	4	4	0	0	AF4/FMR2 family, member 3 (AFF3)
AGAP5	7	7	0	0	ArfGAP with GTPase domain, ankyrin repeat and PH domain 5 (AGAP5)
AHCTF1	4	4	0	0	AT hook containing transcription factor 1 (AHCTF1)
AHRR	4	4	0	0	Aryl-hydrocarbon receptor repressor (AHRR)
AKNAD1	4	4	0	0	AKNA domain containing 1 (AKNAD1)
ALDH5A1	4	4	0	0	Aldehyde dehydrogenase 5 family, member A1 (ALDH5A1)
ALDOB	4	4	0	0	Aldolase B, fructose-bisphosphate (ALDOB)
ALPK3	8	8	0	0	alpha-kinase 3 (ALPK3)
ALS2CR19	4	4	0	0	Partitioning defective 3 homolog B - Q8TEW8 (ALS2CR19)
AMPD2	10	10	0	0	adenosine monophosphate deaminase 2 (AMPD2)
ANAPC1	4	4	0	0	Anaphase promoting complex subunit 1 (ANAPC1)
ANK2	8	8	0	0	ankyrin 2 (ANK2)
ANKRD17	7	7	0	0	ankyrin repeat domain 17 (ANKRD17)
ANKRD35	4	4	0	0	Ankyrin repeat domain 35 (ANKRD35)
ANKRD36B	9	9	0	0	ankyrin repeat domain 36B (ANKRD36B)
ANKRD37 ENSG00000186352	21	21	0	0	ankyrin repeat domain-containing protein 37 (ANKRD37)
ANKS1B	5	5	0	0	Ankryin repeat and sterile alpha motif domain containing 1B (ANKS1B)
ANKS1B ENSG00000185046	5	5	0	0	Ankryin repeat and sterile alpha motif domain containing 1B (ANKS1B)
ANLN ENSG00000011426	6	6	0	0	Anillin, actin binding protein (ANLN)
ANXA11	8	8	0	0	Annexin A11 (ANXA11)
AP1G2 ENSG00000213983	8	8	0	0	AP-1 complex subunit gamma-like 2 (AP1G2)
AP3D1	4	4	0	0	Adaptor-related protein complex 3 delta 1 subunit (AP3D1)
APOBR	5	5	0	0	Apolipoprotein B receptor (APOBR)
ARAP2	6	6	0	0	ArfGAP with RhoGAP domain, ankyrin repeat and PH domain 2 (ARAP2)
ARFGAP3	13	13	0	0	ADP-ribosylation factor GTPase activating protein 3 (ARFGAP3)
ARHGAP44	4	4	0	0	Rho GTPase activating protein 44 (ARHGAP44)
ASAH1	4	4	0	0	N-acylsphingosine amidohydrolase (acid ceramidase) 1 (ASAH1)
ASAP1	4	4	0	0	ArfGAP with SH3 domain, ankyrin repeat and PH domain 1 (ASAP1)
ASGR1 ENSG00000141505	4	4	0	0	Asialoglycoprotein receptor 1 isoform b (ASGR1)
ASXL1 ENSG00000171456	15	15	0	0	Additional sex combs like transcriptional regulator 1 (ASXL1)
ATP2B2	13	13	0	0	ATPase, Ca++ transporting, plasma membrane 2 (ATP2B2)
B4GALNT4 ENSG00000182272	4	4	0	0	beta-1,4-N-acetyl-galactosaminyl transferase 4 (B4GALNT4)
BACE2 ENSG00000182240	7	7	0	0	Beta-site APP-cleaving enzyme 2 (BACE2)
BBX ENSG00000114439	5	5	0	0	BBX protein
BCAR3 ENSG00000137936	6	6	0	0	Breast cancer anti-estrogen resistance protein 3 (BCAR3)
BCL11A ENSG00000119866	6	6	0	0	B-cell CLL/lymphoma 11A (zinc finger protein) isoform A (BCL11A)
BCOR-RARA	6	6	0	0	BCL6 corepressor/retinoic acid receptor alpha fusion protein (BCOR-RARA)
BDP1 ENSG00000145734	8	8	0	0	B double prime 1, subunit of RNA polymerase III transcription initiation factor IIIB (BDP1)
BMX ENSG00000102010	5	5	0	0	cytoplasmic tyrosine-protein kinase BMX
BPTF	4	4	0	0	bromodomain PHD finger transcription factor (BPTF)
BRDT	5	5	0	0	Bromodomain, testis specific (BRDT)
BUD13 ENSG00000137656	4	4	0	0	BUD13 homolog isoform 2
C11orf70 ENSG00000137691	5	5	0	0	Chromosome 11 open reading frame 70 (C11orf70)
C12orf63	7	7	0	0
C12orf64	6	6	0	0	Otogelin-like protein (C12orf64)
C14orf169	4	4	0	0	Bifunctional lysine-specific demethylase and histidyl-hydroxylase NO66
C14orf82 FRMD6-AS1	9	9	0	0
C17orf47 ENSG00000181013	8	8	0	0
C17orf85 ENSG00000074356	9	9	0	0	ELG protein isoform a
C19orf20	5	5	0	0	Tubulin polyglutamylase complex subunit 1
C1orf167	7	7	0	0
C22orf30	4	4	0	0	proline rich 14-like (PRR14L)
C2CD4C FAM148C	4	4	0	0	C2 calcium-dependent domain containing 4C (C2CD4C)
C2orf42 ENSG00000115998	4	4	0	0	Chromosome 2 open reading frame 42
C3orf17	5	5	0	0	Chromosome 3 Open Reading Frame 17, NET17
C3orf17 ENSG00000163608	9	9	0	0	Chromosome 3 Open Reading Frame 17, NET17
C6orf10 ENSG00000206245 ENSG00000204296	9	9	0	0	Chromosome 6 Open Reading Frame 10, TSBP
C6orf142	5	5	0	0	muscular LMNA-interacting protein
CABP1	4	4	0	0	Calcium binding protein 1 (CABP1)
CAMK1G ENSG00000008118	4	4	0	0	calcium/calmodulin-dependent protein kinase type 1G (CAMK1G)
CAMSAP1	5	5	0	0	Calmodulin regulated spectrin-associated protein 1 (CAMSAP1)
CAND2 ENSG00000144712	6	6	0	0	Cullin-associated and neddylation-dissociated 2 (CAND2)
CAPN10	4	4	0	0	calpain 10 (CAPN10)
CARKD	4	4	0	0	carbohydrate kinase domain-containing protein isoform c (CARKD)
CC2D1B	7	7	0	0	coiled-coil and C2 domain containing 1B (CC2D1B)
CCBE1 ENSG00000183287	6	6	0	0	collagen and calcium-binding EGF domains 1 (CCBE1)
CCDC102A	16	16	0	0	coiled-coil domain containing 102A (CCDC102A)
CCDC141 ENSG00000163492	8	8	0	0	coiled-coil domain-containing protein 141 (CCDC141)
CCDC142	4	4	0	0	coiled-coil domain-containing protein 142 (CCDC142)
CCDC146 ENSG00000135205	4	4	0	0	coiled-coil domain-containing protein 146 (CCDC146)
CCDC154	6	6	0	0	coiled-coil domain-containing protein 154 (CCDC154)
CDADC1	7	7	0	0	cytidine and dCMP deaminase domain containing 1 (CDADC1)
CDC42BPG	4	4	0	0	Serine/threonine-protein kinase MRCK gamma (CDC42BPG)
CDKL1 ENSG00000100490	4	4	0	0	Cyclin-dependent kinase-like 1 (CDKL1)
CDKN2A ENSG00000147889	9	9	0	0	cyclin-dependent kinase inhibitor 2A isoform p14ARF (CDKN2A)
CDT1	4	4	0	0	chromatin licensing and DNA replication factor 1 (CDT1)
CENPF	8	8	0	0	Centromere protein F (CENPF)
CEP164	5	5	0	0	Centrosomal protein (CEP164)
CGNL1	4	4	0	0	Cingulin-like 1 (CGNL1)
CHD9	8	8	0	0	chromodomain helicase DNA binding protein 9 (CHD9)
CIT	6	6	0	0	Citron rho-interacting serine/threonine kinase (CIT)
CKAP5	8	8	0	0	Cytoskeleton-associated protein 5 (CKAP5)
CLK1 CLK1;PPIL3 ENSG00000013441	5	5	0	0	CDC-like kinase 1 (CLK1)
CNOT1	4	4	0	0	CCR4-NOT transcription complex, subunit 1 (CNOT1)
COBL ENSG00000106078	6	6	0	0	cordon-bleu WH2 repeat protein (COBL)
COL11A2	9	9	0	0	collagen, type XI, alpha 2 (COL11A2)
COL14A1 ENSG00000187955	6	6	0	0	collagen, type XIV, alpha 1 (COL14A1)
COL6A3	6	6	0	0	collagen, type VI, alpha 3 (COL6A3)
CPLX2 ENSG00000145920	4	4	0	0	complexin 2 (CPLX2)
CRNKL1 ENSG00000101343	4	4	0	0	crooked neck pre-mRNA splicing factor 1 (CRNKL1)
CSTF3 ENSG00000176102	4	4	0	0	cleavage stimulation factor, 3' pre-RNA, subunit 3 (CSTF3)
CTTN ENSG00000085733	6	6	0	0	cortactin (CTTN)
CUL7	9	9	0	0	Cullin-7 (CUL7)
CXorf49	8	8	0	0	chromosome X open reading frame 49 (CXorf49)
DDEF1 ASAP1	4	4	0	0	ArfGAP with SH3 domain, ankyrin repeat and PH domain 1 (ASAP1)
DDX42 ENSG00000198231	8	8	0	0	DEAD box helicase 42 (DDX42)
DENND4C	16	16	0	0	DENN/MADD domain containing 4C (DENND4C)
DFNB31 ENSG00000095397	6	6	0	0	deafness autosomal recessive 31 isoform CRA_d (DFNB31)
DHX34	6	6	0	0	DEAH box polypeptide 34 (DHX34)
DHX8	6	6	0	0	DEAH box polypeptide 8 (DHX8)
DIDO1	10	10	0	0	death inducer-obliterator 1 (DIDO1)
DKFZp434M1123	4	4	0	0	DKFZp434M1123
DKFZp586H1823	8	8	0	0	DKFZp586H1823
DKFZp686D123	4	4	0	0	DKFZp686D123
DKFZp686G16228	4	4	0	0	zinc finger protein 320 (ZNF320)
DKFZp686M088	4	4	0	0	DKFZp686M088
DKFZp686O01196 IGHG1 IGHV4-31	4	4	0	0	Ig gamma-1 chain C region (IGHG1)
DKFZp779M164	4	4	0	0	DKFZp779M164
DKFZp781J211	4	4	0	0	DKFZp781J211
DKK3	4	4	0	0	dickkopf WNT signaling pathway inhibitor 3 (DKK3)
DLG1	5	5	0	0	discs, large homolog 1 (DLG1)
DMD	4	4	0	0	Dystrophin
DMXL1	5	5	0	0	DMX-like 1
DNAH17 ENSG00000187775	8	8	0	0	Dynein (DNAH17)
DNAJA2 ENSG00000069345	4	4	0	0	dnaJ homolog subfamily A member 2 (DNAJA2)
DOCK5	5	5	0	0	dedicator of cytokinesis 5 isoform CRA_a (DOCK5)
DOCK8	4	4	0	0	dedicator of cytokinesis 8 (DOCK8)
DOPEY2	5	5	0	0	DOPEY2
DPH1	12	12	0	0	Diphthamide biosynthesis protein 1 (DPH1)
DPP6 ENSG00000130226	6	6	0	0	Dipeptidyl aminopeptidase-like protein 6 (DPP6)
DROSHA ENSG00000113360	5	5	0	0	DROSHA
DUSP18 ENSG00000167065	5	5	0	0	dual specificity protein phosphatase 18 (DUSP18)
DYNC2H1 ENSG00000187240	4	4	0	0	DYNC2H1
DYRK2 ENSG00000127334	5	5	0	0	dual specificity tyrosine-phosphorylation-regulated kinase 2 isoform 2 (DYRK2)
DZIP1L	4	4	0	0	Zinc finger protein DZIP1L
ECI2 ENSG00000198721	4	4	0	0	enoyl-CoA delta isomerase 2 (ECI2)
EEFSEC	8	8	0	0	Selenocysteine-specific elongation factor (EEFSEC)
EFCAB6	4	4	0	0	EF-hand calcium binding domain 6 (EFCAB6)
EFCC1 CCDC48 ENSG00000114654	4	4	0	0	EF-hand and coiled-coil domain containing 1 (EFCC1)
EIF2AK1	4	4	0	0	eukaryotic translation initiation factor 2-alpha kinase 1 (EIF2AK1)
EIF4E2 ENSG00000135930	4	4	0	0	eukaryotic translation initiation factor 4E member 2 isoform CRA_b (EIF4E2)
EML1	5	5	0	0	Echinoderm microtubule-associated protein-like 1 (EML1)
EMX1 ENSG00000135638	10	10	0	0	EMX1 transcription factor
ENSG00000040933	4	4	0	0	inositol polyphosphate-4-phosphatase, type 1 (INPP4A)
ENSG00000054690	4	4	0	0	pleckstrin homology domain containing, family H (with MyTH4 domain) member 1 (PLEKHH1)
ENSG00000065427	5	5	0	0	lysyl-tRNA synthetase (KARS)
ENSG00000069399	5	5	0	0	B-cell CLL/lymphoma 3 (BCL3)
ENSG00000073614	6	6	0	0	lysine-specific demethylase 5A (KDM5A)
ENSG00000088367	6	6	0	0	erythrocyte membrane protein band 4.1-like 1 (EPB41L1)
ENSG00000100578	9	9	0	0	KIAA0586
ENSG00000102531	6	6	0	0	fibronectin type III domain containing 3A (FNDC3A)
ENSG00000103194	4	4	0	0	ubiquitin specific peptidase 10 (USP10)
ENSG00000103942	10	10	0	0	homer homolog 2 (HOMER2)
ENSG00000107897	4	4	0	0	acyl-CoA binding domain containing 5 (ACBD5)
ENSG00000108510	5	5	0	0	mediator complex subunit 13 (MED13)
ENSG00000112339	4	4	0	0	HBS1-like translational GTPase (HBS1L)
ENSG00000122512	7	7	0	0	postmeiotic segregation increased 2 (PMS2)
ENSG00000124486	5	5	0	0	ubiquitin specific peptidase 9, X-linked (USP9X)
ENSG00000130856	4	4	0	0	zinc finger protein 236 (ZNF236)
ENSG00000131778	4	4	0	0	Chromodomain helicase DNA binding protein 1-like (CHD1L)
ENSG00000137135	5	5	0	0	Rho guanine nucleotide exchange factor 39 (ARHGEF39)
ENSG00000137809	14	14	0	0	integrin, alpha 11 (ITGA11)
ENSG00000137815	5	5	0	0
ENSG00000137948	5	5	0	0	Bromodomain, testis specific (BRDT)
ENSG00000137948	5	5	0	0	Bromodomain, testis specific (BRDT)
ENSG00000139304	6	6	0	0	protein tyrosine phosphatase, receptor type, Q (PTPRQ)
ENSG00000139304	6	6	0	0	protein tyrosine phosphatase, receptor type, Q (PTPRQ)
ENSG00000141510	4	4	0	0	tumor protein p53 (TP53)
ENSG00000141933	4	4	0	0	Tubulin polyglutamylase complex subunit 1 (TPGS1)
ENSG00000142330	7	7	0	0	calpain 10 (CAPN10)
ENSG00000143061	4	4	0	0	immunoglobulin superfamily, member 3 (IGSF3)
ENSG00000144895	5	5	0	0	eukaryotic translation initiation factor 2A (EIF2A)
ENSG00000145734	4	4	0	0	B double prime 1, subunit of RNA polymerase III transcription initiation factor IIIB (BDP1)
ENSG00000153807	6	6	0	0	ENSG00000153807
ENSG00000154222	4	4	0	0	coiled-coil and C2 domain containing 1B (CC2D1B)
ENSG00000155506	4	4	0	0	La ribonucleoprotein domain family, member 1 (LARP1)
ENSG00000160352	4	4	0	0	zinc finger protein 714 (ZNF714)
ENSG00000160999	6	6	0	0	SH2B adaptor protein 2 (SH2B2)
ENSG00000163808	11	11	0	0	kinesin family member 15 (KIF15)
ENSG00000165689	4	4	0	0	serologically defined colon cancer antigen 3 (SDCCAG3)
ENSG00000173120	7	7	0	0	lysine-specific demethylase 2A (KDM2A)
ENSG00000173320	4	4	0	0	storkhead box 2 (STOX2)
ENSG00000174197	7	7	0	0	MAX dimerization protein (MGA)
ENSG00000175267	4	4	0	0	von Willebrand factor A domain containing 3A (VWA3A)
ENSG00000177084	4	4	0	0	polymerase (DNA directed), epsilon, catalytic subunit (POLE)
ENSG00000180263	4	4	0	0	FYVE, RhoGEF, and PH domain containing 6 (FGD6)
ENSG00000181143	6	6	0	0	mucin 16 (MUC16)
ENSG00000181827	8	8	0	0	regulatory factor X, 7 (RFX7)
ENSG00000182903	4	4	0	0	zinc finger protein 721 (ZNF721)
ENSG00000182986	4	4	0	0	zinc finger protein 320 (ZNF320)
ENSG00000185046	5	5	0	0	ankryn repeat and sterile alpha motif domain containing 1B (ANKS1B)
ENSG00000185345	4	4	0	0	parkin RBR E3 ubiquitin protein ligase (PARK2)
ENSG00000187642	10	10	0	0	PPARGC1 and ESRR induced regulator, muscle 1 (PERM1)
ENSG00000188738	9	9	0	0	fibrous sheath interacting protein 2 (FSIP2)
ENSG00000188738	7	7	0	0	fibrous sheath interacting protein 2 (FSIP2)
ENSG00000196208	6	6	0	0	Growth regulation by estrogen in breast cancer 1 (GREB1)
ENSG00000198464	6	6	0	0	zinc finger 480 (ZNF480)
ENSG00000211976	5	5	0	0	ENSG00000211976
ENSG00000212867	4	4	0	0	ENSG00000212867
ENSG00000214655	5	5	0	0	zinc finger, SWIM-type containing 8 (ZSWIM8)
ENSG00000232541	8	8	0	0	ENSG00000232541
ENSG00000232541	8	8	0	0	ENSG00000232541
ENSG00000243335	4	4	0	0	potassium channel tetramerization domain containing 7 (KCTD7)
ENSG00000253729	17	17	0	0	protein kinase, DNA-activated, catalytic polypeptide (PRKDC)
ENSG00000257339	6	6	0	0	ENSG00000257339
EPB41L1	6	6	0	0	erythrocyte membrane protein band 4.1-like 1 (EPB41L1)
EPPK1	9	9	0	0	epiplakin (EPPK1)
ERC1 ENSG00000082805	4	4	0	0	ELKS/RAB6-interacting/CAST family member 1 (ERC1)
ERP29 HEL-S-107 ENSG00000089248	5	5	0	0	endoplasmic reticulum resident protein 29 (ERP29)
EZH2	5	5	0	0	enhacer of zeste 2 polycomb repressive complex 2 ubunit (EZH2)
F7 ENSG00000057593	5	5	0	0	coagulation factor VII (F7)
FACL5 ACSL5 ENSG00000197142	6	6	0	0	Fatty acid coenzyme A ligase 5 (FACL5)
FAM160A1 LOC729830 ENSG00000164142	8	8	0	0	family with sequence similarity 160, member A1 (FAM160A1)
FAM178A C10orf6 ENSG00000119906	7	7	0	0	Family with sequence similarity 178, member A (FAM178A)
FAM188B;INMT	4	4	0	0	INMT
FAM193B	4	4	0	0	FAM193B
FAM229A LOC100128071	5	5	0	0	FAM229A
FAM3A ENSG00000071889	4	4	0	0	family 3, member A protein isoform 2 precursor
FAM47DP	4	4	0	0	FAM47D
FAM48B1 SUPT20HL1	4	4	0	0	FAM48B1
FAM60A	9	9	0	0	Human family with sequence similarity 60 member A (FAM60A)
FAM65A	6	6	0	0	FAM65A
FAM76A ENSG00000009780	6	6	0	0	FAM76A
FAM83H	5	5	0	0	FAM83H
FAT1	8	8	0	0	FAT atypical cadherin 1 (FAT1)
FAT2	6	6	0	0	FAT atypical cadherin 2 (FAT2)
FAT4 ENSG00000196159	7	7	0	0	FAT atypical cadherin 4 (FAT4)
FBXL11 KDM2A	6	6	0	0	lysine-specific demethylase 2A (KDM2A)
FBXO34	4	4	0	0	F-box protein 34 (FBXO34)
FER ENSG00000151422	4	4	0	0	fer (fps/fes related) tyrosine kisase (FER)
FER1L3 MYOF	4	4	0	0	myoferlin (MYOF)
FERMT3 ENSG00000149781	11	11	0	0	fermitin family homolog 3 long form (FERMT3)
FGF5 ENSG00000138675	4	4	0	0	fibroblast growth factor 5 (FGF5)
FGFRL1 ENSG00000127418	4	4	0	0	fibroblast growth factor receptor-like 1 precursor (FGFRL1)
FIZ1 ZNF579 ENSG00000179943	4	4	0	0	FLT-interacting zinc finger 1
FLJ00370	4	4	0	0	FLJ00370 protein (Fragment)
FLJ00404 CXCL12	4	4	0	0	chemokine (C-X-C motif) ligand 12 (CXCL12)
FLJ10404	4	4	0	0	chemokine (C-X-C motif) ligand 12 (CXCL12)
FLJ10769	4	4	0	0	carbohydrate kinase domain-containing protein isoform c (CARKD)
FLJ44048	8	8	0	0	fibrous sheath interacting protein 2 (FSIP2)
FLJ46010	7	7	0	0	FLJ46010
FLOT1	4	4	0	0	flotillin 1(FLOT1)
FLT1 ENSG00000102755	6	6	0	0	fms-related tyrosine kinsae 1 (FLT1)
FNDC3A ENSG00000102531	6	6	0	0	fibronectin type-III domain-containing protein 3A isoform 1 (FNDC3A)
FRAS1	7	7	0	0	Fraser extracellular matrix complex subunit 1 (FRAS1)
FRMD3 ENSG00000172159	9	9	0	0	FERM domain containing 3 (FRMD3)
FRMD4A ENSG00000151474	5	5	0	0	FERM domain containing 4A (FRMD4A)
FSIP2 ENSG00000188738	9	9	0	0	fibrous sheath interacting protein 2 (FSIP2)
FUK ENSG00000157353	10	10	0	0	fucokinase (FUK)
FYN	5	5	0	0	FYN
GALNT2 ENSG00000143641	6	6	0	0	polypeptide N-acetylgalactosaminyltransferase 2 (GALNT2)
GAS2L1 ENSG00000185340	4	4	0	0	growth arrest-specific 2 like 1 (GAS2L1)
GFI1 ENSG00000162676	9	9	0	0	growth factor independent 1 transcription repressor (GFI1)
GMCL1P1 GMCL1L	4	4	0	0	germ cell-less, protein-like 1 (GMCL1P1)
GNPTG ENSG00000090581	4	4	0	0	n-acetylglucosamine-1-phosphate transferase, gamma subunit (GNPTG)
GOLGA3 ENSG00000090615	7	7	0	0	golgin A3 (GOLGA3)
GPR137 ENSG00000173264	4	4	0	0	G protein-coupled receptor 137 (GPR137)
GPR142	9	9	0	0	G protein-coupled receptor 142 (GPR142)
GPRIN1	4	4	0	0	G protein regulated inducer of neurite outgrowth 1 (GPRIN1)
GPX1	4	4	0	0	glutathione peroxidase 1 (GPX1)
GRAMD4 DIP ENSG00000075240	7	7	0	0	GRAM domain-containing protein 4 (GRAMD4)
GREB1 ENSG00000196208	6	6	0	0	Growth regulation by estrogen in breast cancer 1 (GREB1)
GREM2 ENSG00000180875	4	4	0	0	gremlin 2 (GREM2)
GRIFIN	6	6	0	0	galectin-related inter-fiber protein (GRIFIN)
GRM2 ENSG00000164082	4	4	0	0	glutamate receptor, metabotropic 2 (GRM2)
gs52 LOC100287301;LOC100290470 ENSG00000162002	5	5	0	0	Putative uncharacterized protein gs52
GTBP	5	5	0	0	GTBP
GTPBP6	5	5	0	0	GTP binding protein 6 (GTPBP6)
GTPBP8 ENSG00000163607	6	6	0	0	GTP binding protein 8 (GTPBP8)
H1F0 ENSG00000189060	9	9	0	0	histone H1.0
HCLS1	6	6	0	0	hematopoietic cell-specific Lyn substrate 1 (HCLS1)
HEATR7B1	11	11	0	0	Maestro heat-like repeat-containing protein family member 2A (HEATR7B1)
HECTD3	5	5	0	0	HECT domain containing E3 ubiquitin protein ligase 3 (HECTD3)
HECW1	8	8	0	0	HECT C2 and WW domain containing E3 ubiquitin protein ligase 1 (HECW1)
HELZ	4	4	0	0	helicase with zing finger (HELZ)
HERC5 ENSG00000138646	4	4	0	0	HECT and RLD domain containing E3 ubiquitin protein ligase 5 (HERC5)
HIP1	7	7	0	0	huntingtin interacting protein 1 (HIP1)
HIP1R ENSG00000130787	6	6	0	0	huntingtin interacting protein 1 related (HIP1R)
HIST1H1B ENSG00000184357	18	18	0	0	histone H1.5 (hist1H1B)
HIST1H1T	6	6	0	0	histone cluster 1, H1t (HIST1H1T)
HIVEP2	11	11	0	0	human immunodeficiency virus type I enhancer binding protein 2 (HIVEP2)
HNRNPA1 ENSG00000135486	16	16	0	0	Heterogeneous Nuclear Ribonucleoprotein A1 (HNRNPA1)
HNRNPA1L2 RP11-78J21.1 ENSG00000139675	5	5	0	0	heterogeneous nuclear ribonucleoprotein A1-like 2 (HNRNPA1L2)
HNRNPR	6	6	0	0	heterogeneous nuclear ribonucleoprotein R (HNRNPR)
HNRNPU	40	40	0	0	Heterogeneous nuclear ribonucleoprotein U (Scaffold attachment factor A) (HNRNPU)
HNRPR	6	6	0	0	heterogeneous nuclear ribonucleoprotein R (HNRPR)
HOMER2 ENSG00000103942	10	10	0	0	homer protein homolog 2 (HOMER2)
HPS1 ENSG00000107521	4	4	0	0	Hermansky-Pudlak syndrome 1 (HPS1)
HRI	4	4	0	0	HRI
HS3ST5 ENSG00000249853	4	4	0	0	heparan sulfate (glucosamine) 3-O-sulfotransferase 5 (HS3ST5)
HSD11B1L	6	6	0	0	hydroxysteroid (11-beta) dehydrogenase 1-like (HSD11B1L)
HSD11B1L ENSG00000167733	4	4	0	0	hydroxysteroid (11-beta) dehydrogenase 1-like (HSD11B1L)
HSPG	8	8	0	0	heparan sulfate proteoglycan 2 (perlecan) (HSPG)
ICAM5	5	5	0	0	intercellular adhesion molecule 5, telencephalin (ICAM5)
IDE	7	7	0	0	insulin degrading enzyme (IDE)
IFT81 ENSG00000122970	4	4	0	0	intraflagellar transport 81 (IFT81)
IGSF3	4	4	0	0	immunoglobulin superfamily, member 3 (IGSF3)
INPP4A	6	6	0	0	inositol polyphosphate-4-phosphatase, type 1 (INPP4A)
IQSEC2	6	6	0	0	IQ motif and Sec7 domain 2 (IQSEC2)
IQUB	4	4	0	0	IQ motif and ubiquitin domain containing (IQUB)
ISY1	4	4	0	0	ISY1
ITGA11	14	14	0	0	integrin alpha-11 (ITGA11)
ITGA4	4	4	0	0	Integrin alpha-4 (ITGA4)
ITPR1	6	6	0	0	inositol 1,4,5-trisphosphate receptor type 1 (ITPR1)
JARID1A	6	6	0	0	lysine-specific demethylase 5A (KDM5A)
JARID1B ENSG00000117139	5	5	0	0	lysine-specific demethylase 5B (KDM5B)
JARID2	12	12	0	0	jumonji, AT rich interactive domain 2 (JARID2)
JARID2 ENSG00000008083	5	5	0	0	jumonji, AT rich interactive domain 2 (JARID2)
JUNB ENSG00000171223	8	8	0	0	transcription factor jun-B (JUNB)
KALRN	6	6	0	0	kalirin, RhoGEF kinase (KALRN)
KANK2	4	4	0	0	KN motif and ankyrin repeat domains 2 (KANK2)
KARS ENSG00000065427	5	5	0	0	lysyl-tRNA synthetase (KARS)
KATNAL1	8	8	0	0	Katanin p60 ATPase-containing subunit A-like 1 (KATNAL1)
KCNK17 ENSG00000124780	4	4	0	0	potassium channel, subfamily K, member 17 (KCNK17)
KDM2A FBXL11 ENSG00000173120	7	7	0	0	lysine-specific demethylase 2A (KDM2A)
KDM4C	4	4	0	0	lysine-specific demethylase 4C (KDM4C)
KIAA0241 AVL9	4	4	0	0	AVL9
KIAA0430 ENSG00000166783	5	5	0	0	limkain-b1 isoform 3
KIAA0515 BAT2L ENSG00000130723	6	6	0	0	BAT2L
KIAA0586	10	10	0	0	KIAA0586
KIAA0947	9	9	0	0	interactor of little elongator complex ELL subunit 1 (ICE1)
KIAA1210 ENSG00000241087	4	4	0	0	KIAA1210
KIAA1210 RP13-347D8.3 ENSG00000250423	11	11	0	0	KIAA1210
KIAA1522 ENSG00000162522	8	8	0	0	KIAA1522
KIAA1524 ENSG00000163507	4	4	0	0	KIAA1524
KIAA1524 ENSG00000163507	4	4	0	0	KIAA1524
KIAA1843 ENSG00000144406	4	4	0	0	UNC80 homolog
KIAA1856	9	9	0	0	trinucleotide repeat containing 18 (TNRC18)
KIF15 ENSG00000163808	11	11	0	0	kinesin-like protein KIF15
KIF27	12	12	0	0	kinesin family member 27 (KIF27)
KIRREL ENSG00000183853	7	7	0	0	kin of IRRE-like protein 1 (KIRREL)
KLHDC7B	12	12	0	0	kelch domain containing 7B (KLHDC7B)
KLHL21 ENSG00000162413	4	4	0	0	kelch-like family member 21 (KLHL21)
KRT1	4	4	0	0	Keratin, type II cytoskeletal 1 (KRT1)
KRT81	4	4	0	0	keratin 81 (KRT81)
L3MBTL ENSG00000185513	4	4	0	0	L(3)mbt-like
LINC00207 RP3-474I12.8-001 RP3-474I12.5 ENSG00000187012	12	12	0	0	LINC00207
LOC100127891	4	4	0	0	LOC100127891
LOC100128317	4	4	0	0	LOC100128317
LOC100130174	4	4	0	0	LOC100130174
LOC100130297	4	4	0	0	LOC100130297
LOC100131257	4	4	0	0	LOC100131257
LOC100133923	6	6	0	0	LOC100133923
LOC100287034	4	4	0	0	LOC100287034
LOC100287244;LOC100291793	8	8	0	0	LOC100291793
LOC100287651	4	4	0	0	LOC100287651
LOC100287920	6	6	0	0	LOC100287920
LOC100288189;LOC100291505	4	4	0	0	LOC100291505
LOC100288205;LOC100290812	4	4	0	0	LOC100290812
LOC100288426	5	5	0	0	LOC100288426
LOC100288723	8	8	0	0	LOC100288723
LOC100288840;LOC100290946	7	7	0	0	LOC100290946
LOC100289661	11	11	0	0	LOC100289661
LOC100289978	11	11	0	0	LOC100289978
LOC100290128	6	6	0	0	LOC100290128
LOC100292035	30	30	0	0	LOC100292035
LOC100292387	6	6	0	0	hemicentin-2-like
LOC100292514;LOC100290880;LOC100288000	4	4	0	0	LOC100292514
LOC100292522;LOC100287233	7	7	0	0	LOC100292522
LOC100292745;LOC100290074	4	4	0	0	LOC100292745
LOC100292884	6	6	0	0	LOC100292884
LOC100293999 ENSG00000225587	4	4	0	0	LOC100293999
LOC100653515	4	4	0	0	differential display clone 8 isoform 1
LOC100996290	4	4	0	0	LOC100996290
LOC101930171 LOC101930165 LOC102725042 TCEB3CL;TCEB3C	4	4	0	0	transcription elongation factor B polypeptide 3C (TCEB3C)
LOC102724426	5	5	0	0	LOC102724426
LOC283999 ENSG00000204278	4	4	0	0	transmembrane protein 235 (TMEM235)
LOC284889 ENSG00000218537	4	4	0	0	ENSG00000218537
LOC338667	4	4	0	0	LOC338667
LOC339766	8	8	0	0	LOC339766
LOC389072 ENSG00000178385	7	7	0	0	pleckstrin homology domain containing, family M, member 3 (PLEKHM3)
LOC390427	8	8	0	0	TBP-associated factor 15 isoform 1
LOC401233	4	4	0	0	LOC401233
LOC643406	6	6	0	0	LOC643406
LOC643936 ENSG00000205410	4	4	0	0	LOC643936
LOC644006	5	5	0	0	LOC644006
LOC645195	6	6	0	0	LOC645195
LOC645490	4	4	0	0	High mobility group protein B1 (High mobility group protein 1) (HMG-1) (Amphoterin) (Heparin-binding protein p30)
LOC646471	4	4	0	0	LOC646471
LOC646976	13	13	0	0	LOC646976
LOC653185	4	4	0	0	transcription elongation factor B polypeptide 3 binding protein 1
LOC728445	4	4	0	0	LOC728445
LOC728466	6	6	0	0	LOC728466
LOC729056	5	5	0	0	LOC729056
LOC729581	68	68	0	0	LOC729581
LOC730658 LOC400986	5	5	0	0	LOC730658
LOC731009	4	4	0	0	ZNF678
LOC90586	4	4	0	0	LOC90586
LOXL2 LOXL2;ENTPD4 ENSG00000134013	5	5	0	0	lysyl oxidase homolog 2 precursor (LOXL2)
LPIN1	4	4	0	0	Lipin-1 (LPIN1)
LRBA ENSG00000198589	4	4	0	0	LBRA
LRRC27 ENSG00000148814	4	4	0	0	leucine rich repeat containing 27 (LRRC27)
LRRC71 C1orf92 ENSG00000160838	4	4	0	0	leucine rich repeat containing 71 (LRRC71)
LRRK1	5	5	0	0	leucine-rich repeat kinase 1 (LRRK1)
LRRK1	4	4	0	0	leucine-rich repeat kinase 1 (LRRK1)
LTB4R ENSG00000213903	4	4	0	0	leukotriene B4 receptor (LTB4R)
LYPD3 ENSG00000124466	7	7	0	0	LY6/PLAUR domain containing 3 (LYPD3)
LZTS2 ENSG00000107816	5	5	0	0	leucine zipper, putative tumor suppressor 2 (LZTS2)
MAD1L1 ENSG00000002822	5	5	0	0	mitotic spindle assembly checkpoint protein MAD1 (MAD1L1)
MAP2	6	6	0	0	microtubule-associated protein 2 (MAP2)
MAP3K5 ENSG00000197442	4	4	0	0	MAP3K5
MAPKAPK2	14	14	0	0	mitogen-activated protein kinase-activated protein kinase 2 (MAPKAPK2)
MARCH7 ENSG00000136536	4	4	0	0	membrane-associated ring finger, E3 ubiquitin protein ligase (MARCH7)
MARVELD3	5	5	0	0	MARVEL domain-containing protein 3 (MARVELD3)
MATN2	8	8	0	0	Matrilin 2 (MATN2)
MBL2 ENSG00000165471	5	5	0	0	mannose-binding lectin (protein C) 2, soluble (MBL2)
MCCC1	41	41	0	0	methylcrotonoyl-Coenzyme A carboxylase 1 (alpha)MCCC1
MCM2 ENSG00000073111	5	5	0	0	minichromosome maintenance complex component 2 (MCM2)
MDN1 ENSG00000112159	4	4	0	0	midasin (MDN1)
MED12L	8	8	0	0	mediator complex subunit 12-like (MED12L)
MED13	5	5	0	0	Mediator of RNA polymerase II transcription subunit 13 (MED13)
MEFV	7	7	0	0	mediterranean fever (MEFV)
MGA	5	5	0	0	MGA
MICAL3 LOC729269	13	13	0	0	microtubule associated monooxygenase, calponin and LIM domain containing 3 (MICAL3)
MIR503HG MGC16121	7	7	0	0	mgc16121
MMP11	6	6	0	0	matrix metallopeptidase 11 (MMP11)
MROH2A	8	8	0	0	maestro heat-like repeat family member 2A (MROH2A)
MSANTD3-TMEFF1	4	4	0	0	transmembrane protein with EGF-like and two follistatin-like domains 1 (TMEFF1)
MSH6 ENSG00000116062	8	8	0	0	DNA mismatch repair (MSH6)
MTFR1	4	4	0	0	Mitochondrial fission regulator 1 (MTFR1)
MTHFSD	8	8	0	0	methenyltetrahydrofolate synthase domain-containing protein isoform 4 (MTHFSD)
MUC16	16	15	0	0	Mucin-16 (MUC16)
MUC5AC	4	4	0	0
MYH11 ENSG00000133392	11	11	0	0	Myosin heavy chain 11 (MYH11)
MYH15	4	4	0	0	Myosin heavy chain 15 (MYH15)
MYO18B	35	35	0	0	Myosin 18B (MYO18B)
MYO1A ENSG00000166866	4	4	0	0	MYO1A
MYO1B ENSG00000128641	4	4	0	0	MYO1B
MYOF	4	4	0	0	MYOF/FER1L3
MYT1L	5	5	0	0	Myelin transcription factor 1-like protein
NACC2 BTBD14A ENSG00000148411	4	4	0	0	NACC2
NAG	6	6	0	0	NAG
NAV3	7	7	0	0	neuron navigator 3 (NAV3)
NBAS ENSG00000151779	6	6	0	0	neuroblastoma amplified sequence (NBAS)
NBPF12 ENSG00000186275	5	5	0	0	neuroblastoma breakpoint family, member 12 (NBPF12)
NBPF8 NBPF1;NBPF10;NBPF20;NBPF9;NBPF8;NBPF16;KIAA1245;NBPF14;NBPF15;NBPF11	8	8	0	0	Neuroblastoma breakpoint family member 8 (NBPF8)
NEIL3	4	4	0	0	nei endonuclease VIII-like 3 (NEIL3)
NELL1	5	5	0	0	protein kinase C-binding protein NELL1
NELL2 ENSG00000184613	6	6	0	0	protein kinase C-binding protein NELL2
NKX1-1	4	4	0	0	NK1 homeobox 1 (NKX1-1)
NLRP12	6	6	0	0	NACHT leucine rich repeat and PYD containing 12 (NLRP12)
NLRP5	8	8	0	0	NLR family, pyrin domain containing 5 (NRLP5)
NOL1 NOP2 ENSG00000111641	4	4	0	0	NOL1
NOLC1	5	5	0	0	nucleolar and coiled-body phosphoprotein 1 (NOLC1)
NOP56 ENSG00000101361	4	4	0	0	NOP56 ribonucleoprotein
NOTCH4	5	5	0	0	NOTCH4 protein
NPR3 ENSG00000113389	6	6	0	0	natriuretic peptide receptor 3 isoform 1 (NPR3)
NR1H2	10	10	0	0	nuclear receptor subfamily 1, group H, member 2 (NR1H2)
NR5A1	7	7	0	0	Nuclear receptor subfamily 5, group A, member 1 (NR5A1)
NRDE2 C14orf102 ENSG00000119720	5	5	0	0	NRDE2
NRP1 DKFZp781F1414	4	4	0	0	neuropilin 1 (NRP1)
NUDT18 ENSG00000173566	8	8	0	0	nudix (nucleoside diphosphate linked moiety X)-type motif 18 (NUDT18)
NUMA1 ENSG00000137497	4	4	0	0	nuclear mitotic apparatus protein 1 (NUMA1)
OAS2 ENSG00000111335	6	6	0	0	2-5-oligoadenylate synthase 2 isoform 1 (OAS2)
OBSCN	4	4	0	0	obscurin, cytoskeletal calmodulin and titin-interacting RhoGEF (OBSCN)
OSBP2 ENSG00000184792	8	8	0	0	Oxysterol-binding protein (OSBP2)
OTOA	4	4	0	0	otoancorin (OTOA)
OTOGL	5	5	0	0	Otogelin-like (OTOGL)
OTUD7A	5	5	0	0	OTU domain-containing protein 7A (OTUD7A)
OVOS	4	4	0	0	Ovostatin (OVOS)
OVOS1	6	6	0	0	Ovostatin homolog 1 (OVOS1)
PALLD	4	4	0	0	palladin (PALLD)
PAPD5	4	4	0	0	PAP-associated domain-containing protein 5 (PAPD5)
PARK2	4	4	0	0	Parkinson disease (autosomal recessive juvenile) 2 parkin isoform CRA_b (PARK2)
PCDH19 ENSG00000165194	5	5	0	0	protocadherin-19 isoform c precursor (PCDH19)
PCDH7	4	4	0	0	protocadherin-7 isoform c precursor (PCDH7)
PCDHB9	5	5	0	0	Similar to protocadherin-3 (PCDH3)
PCDHGB3	6	6	0	0	protocadherin gamma-B3 isoform 2 (PCDHGB3)
PCNX	8	8	0	0	pecanex homolog (Drosophila) isoform CRA_d (PCNX)
PCYT1A ENSG00000161217	6	6	0	0	Phosphate cytidylyltransferase 1, choline, alpha (PCYT1A)
PDE4DIP ENSG00000178104	4	4	0	0	myomegalin isoform 5 (PDE4DIP)
PDE8B ENSG00000113231	6	6	0	0	high affinity cAMP-specific and IBMX-insensitive 3,5-cyclic phosphodiesterase 8B isoform 4 (PDE8B)
PDILT ENSG00000169340	4	4	0	0	protein disulfide isomerase-like, testis expressed (PDILT)
PDZGEF1	5	5	0	0	PDZGEF1
PERM1 C1orf170	10	10	0	0	Peroxisome Proliferator-activated Receptor γ Coactivator 1 (PGC-1)- and Estrogen-related Receptor (ERR)-induced Regulator in Muscle 1 (PERM1)
PHF10	4	4	0	0	PHD finger protein 10 (PHF10)
PHKA1	5	5	0	0	phosphorylase kinase, alpha 1 (PHKA1)
PIWIL2 ENSG00000197181	8	8	0	0	piwi-like protein 2 (PIWIL2)
PKHD1	5	5	0	0	polycystic kidney and hepatic disease 1 (PKHD1)
PKN2	11	11	0	0	Protein kinase N2 (PKN2)
PLEKHA4	4	4	0	0	pleckstrin homology domain containing, family A (phosphoinositide binding specific) member 4 (PLEKHA4)
PLEKHH1 ENSG00000054690	4	4	0	0	pleckstrin homology domain-containing family H member 1 (PLEKHH1)
PLEKHH3	4	4	0	0	pleckstrin homology domain-containing, family H, member 3 (PLEKHH3)
PLEKHM1	4	4	0	0	Pleckstrin homology domain-containing family M member 1 (PLEKHM1)
PLEKHM1 ENSG00000225190	8	8	0	0	Pleckstrin homology domain-containing family M member 1 (PLEKHM1)
PLEKHN1	4	4	0	0	pleckstrin homology domain containing, family N member 1 (PLEKHN1)
PLOD2 ENSG00000152952	4	4	0	0	Procollagen-lysine, 2-oxoglutarate 5-dioxygenase 2 (PLOD2)
PLXNA4 ENSG00000189437 ENSG00000221866	6	6	0	0	plexin-A4 isoform 1 (PLXNA4)
PMS2CL	5	5	0	0	PMS2CL
POLL	8	8	0	0	polymerase lamda (POLL)
POLN	5	5	0	0	Polymerase nu (POLN)
POLR2B	5	5	0	0	polymerase (RNA) II polypeptide B (POLR2B)
POLR3G	4	4	0	0	polymerase (RNA) III polypeptide G (POLR3G)
PPM1J ENSG00000155367	13	13	0	0	protein phosphatase 1J (PPM1J)
PRCD	5	5	0	0	progressive rod-cone degeneration (PRCD)
PRKCQ ENSG00000065675	4	4	0	0	Protein kinase C, theta (PRKCQ)
PRR14	7	7	0	0	proline rich 14 (PRR14)
PRTG ENSG00000166450	5	5	0	0	protogenin (PRTG)
PTPN9 ENSG00000169410	7	7	0	0	protein tyrosine phosphatase, non-receptor type 9 (PTPN9)
PTPRQ	6	6	0	0	protein tyrosine phosphatase, receptor type, Q (PTPRQ)
R3HDM1 ENSG00000048991	5	5	0	0	R3HDM1
R3HDM1 ENSG00000048991	5	5	0	0	R3HDM1
RAB11FIP1	11	11	0	0	RAB11 family interacting protein 1 isoform 3 (RAB11FIP1)
RAB24	5	5	0	0	Rab24
RABGEF1	4	4	0	0	RABGEF1
RAI1	6	6	0	0	retinoic acid induced 1 (RAI1)
RANBP2 ENSG00000153201	16	16	0	0	RAN binding protein 2 (RANBP2)
RAPGEF2	5	5	0	0	rap guanine nucleotide exchange factor 2 (RAPGEF2)
RASGRF1	9	9	0	0	Ras protein-specific guanine nucleotide-releasing factor 1 (RASGRF1)
RBM1	9	9	0	0	RNA binding motif protein, Y-linked, family 1, member A1 (RBM1)
RBMXL1 CCBL2 ENSG00000213516	9	9	0	0	heterogeneous nuclear ribonucleoprotein G-like 1 (RBMXL1)
RBMY1A1	4	4	0	0	RNA binding motif protein, Y-linked, family 1, member A1 (RBM1)
REXO1	5	5	0	0	REX1, RNA exonuclease 1 homolog (REXO1)
REXO1L1	4	4	0	0	REXO1L1
REXO1L8P REXO1L2P	4	4	0	0	REXO1L8P
REXO2	7	7	0	0	RNA exonuclease 2 (REXO2)
RFX7	5	5	0	0	regulatory factor X, 7 (RFX7)
RNF113A	12	12	0	0	ring finger protein 113A (RNF113A)
RNF19B	4	4	0	0	ring finger protein 19B (RNF19B)
RNF213 ENSG00000173821	4	4	0	0	ring finger protein 213 (RNF213)
RNF220	4	4	0	0	ring finger protein 220 (RNF220)
RPF2P1 LOC729608	4	4	0	0	RPF2P1
RPL3 ENSG00000100316	9	9	0	0	ribosomal protein L3 (RPL3)
RPUSD2	4	4	0	0	RNA pseudouridylate synthase domain containing 2 (RPUSD2)
RRM2 ENSG00000171848	5	5	0	0	ribonucleotide reductase M2 (RRM2)
RRN3	6	6	0	0	RRN3
RRP7A CTA-126B4.3 ENSG00000189306	4	4	0	0	ribosomal RNA processing 7 homolog A (RRP7A)
RSHL1	5	5	0	0	Radial spokehead-like 1 (RSHL1)
RTF1	5	5	0	0	RTF1
RUFY1 ENSG00000176783	4	4	0	0	RUN and FYVE domain-containing protein 1 isoform b (RUFY1)
RYR1	9	9	0	0	Ryanodine receptor 1 (RYR1)
SCAF4 SFRS15	6	6	0	0	splicing factor, arginine/serine-rich 15 isoform 2 (SFRS15)
SCAMP2 ENSG00000140497	5	5	0	0	SCAMP2
SCAND3 ZNF452 ENSG00000232040	9	9	0	0	SCAN domain-containing protein 3 (SCAND3)
SCAP ENSG00000114650	4	4	0	0	SREBF chaperone (SCAP)
SCIN ENSG00000006747	5	5	0	0	adseverin (SCIN)
SCRT2 ENSG00000215397	8	8	0	0	transcriptional repressor scratch (SCRT2 )
SDCCAG3	4	4	0	0	serologically defined colon cancer antigen 3 (SDCCAG3)
SDK1	11	11	0	0	sidekick homolog 1 (SDK1)
SEMA5A ENSG00000112902	20	20	0	0	Sema Domain, Seven Thrombospondin Repeats (Type 1 And Type 1-Like), Transmembrane Domain (TM) And Short Cytoplasmic Domain, (Semaphorin) 5A (SEMA5A)
SEMA5B	5	5	0	0	Sema Domain, Seven Thrombospondin Repeats (Type 1 And Type 1-Like), Transmembrane Domain (TM) And Short Cytoplasmic Domain, (Semaphorin) 5 (SEMA5B)
SETD8	10	10	0	0	N-lysine methyltransferase SETD8
SFRS15	6	6	0	0	Splicing factor, arginine/serine-rich 15 (SFRS15)
SFRS16	4	4	0	0	Splicing factor, arginine/serine-rich 16 (SFRS16)
SGK1 ENSG00000118515	4	4	0	0	serum/glucocorticoid regulated kinase (SGK1)
SH2B2	6	6	0	0	SH2B adapter protein 2 (SH2B2)
SHANK3	28	28	0	0	SH3 and multiple akyrin repeat domains 3 (SHANK3)
SHQ1 ENSG00000144736	4	4	0	0	SHQ1
SLC12A8 ZNF148 ENSG00000163848	15	11	0	0	SLC12A8 (ZNF148)
SLC22A31 LOC146429	4	4	0	0	Solute carrier family 22 member 31 (SLC22A31)
SMC1B	5	5	0	0	Structural maintenance of chromosomes protein 1B (SMC1B)
SMC4	4	4	0	0	structural maintenance of chromosomes 4 (SMC4)
SMC4 ENSG00000113810	7	7	0	0	structural maintenance of chromosomes 4 (SMC4)
SMG7	8	6	0	0	nonsense mediated mRNA decay factor (SMG7)
SNED1	4	4	0	0	sushi, nidogen and EGF-like domains 1 (SNED1)
SORBS1	15	15	0	0	sorbin and SH3 domain containing 1 (SORBS1)
SORBS2	4	4	0	0	sorbin and SH3 domain containing 2 (SORBS2)
SP140	5	5	0	0	SP140
SPAG9	4	4	0	0	sperm associated antigen 9 (SPAG9)
SPEG ENSG00000072195	4	4	0	0	SPEG
SPESP1;NOX5 NOX5;SPESP1	9	9	0	0	NADPH oxidase, EF-hand calcium binding domain 5 (NOX5)
SPIRE1	4	4	0	0	SPIRE1
SQLE	5	5	0	0	Squalene epoxidase (SQLE)
SRD5A2	5	5	0	0	3-oxo-5-alpha-steroid 4-dehydrogenase 2 (SRD5A2)
SSFA2	4	4	0	0	Sperm specific antigen 2 (SSFA2)
SSPO	7	7	0	0	SCO-spondin (SSPO)
SSTR5 ENSG00000162009	11	11	0	0	somatostatin receptor type 5 (SSTR5)
STOX2 ENSG00000173320	4	4	0	0	storkhead-box protein 2 (STOX2)
STT3A ENSG00000134910	4	4	0	0	STT3A
SUMF1 ENSG00000144455	4	4	0	0	sulfatase-modifying factor 1 (SUMF1)
SVIL	7	7	0	0	supervillin (SVIL)
SYNCRIP	4	4	0	0	synaptotagmin binding, cytoplasmic RNA interacting protein (SYNCRIP)
SYNE2	12	12	0	0	spectrin repeat containing nuclear envelope 2 (SYNE2)
SYNJ2	5	5	0	0	synaptojanin 2 (SYNJ2)
SYT7	6	6	0	0	synaptotagmin VII gamma(SYT7)
TAF1	4	4	0	0	TAF1
TALD3 KIAA0586 ENSG00000100578	9	9	0	0	TALD3
TAX1BP1	5	5	0	0	Tax1 binding protein 1 (TAX1BP1)
TCEB3CL2	4	4	0	0	transcription elongation factor B polypeptide 3C-like 2 (TCEB3CL2)
TCF23 ENSG00000163792	5	5	0	0	transcription factor 23 (TCF23)
TCOF1	8	8	0	0	Treacher Collins-Franceschetti syndrome 1 (TCOF1)
TDRD6 ENSG00000180113	7	7	0	0	tudor domain-containing protein 6 (TDRD6)
TENM4 ODZ4 ENSG00000149256	12	12	0	0	teneurin-4 (TENM4)
TEP1 ENSG00000129566	6	6	0	0	telomerase-associated protein 1 (TEP1)
TERF1 ENSG00000147601	4	4	0	0	telomeric repeat binding factor 1 (TERF1)
TERF1P3 LOC646316	4	4	0	0	telomeric repeat binding factor 1 (TERF1)
TERF2	4	4	0	0	telomeric repeat binding factor 2 (TERF2)
TET2 ENSG00000168769	4	4	0	0	tet methylcytosine dioxygenase 2 (TET2)
TFB1M ENSG00000029639	10	10	0	0	dimethyladenosine transferase 1 (TFB1M )
TFRC ENSG00000072274	4	4	0	0	Transferrin receptor CD71 (TFRC)
THAP4	6	6	0	0	THAP domain containing 4 (THAP4)
TIGD1 ENSG00000221944	5	5	0	0	tigger transposable element derived 1 (TIGD1)
TMTC3 ENSG00000139324	4	4	0	0	transmembrane and TPR repeat-containing protein 3 (TMTC3)
TNK2 ENSG00000061938	6	6	0	0	Tyrosine kinase, non-receptor, 2 (TNK2)
TNS3	4	4	0	0	tensin 3 (TNS3)
TOPBP1	4	4	0	0	Topoisomerase (DNA) II binding protein 1 (TOPBP1)
TRAPPC5 ENSG00000181029	4	4	0	0	trafficking protein particle complex subunit 5 (TRAPPC5)
TRIM11 ENSG00000154370	4	4	0	0	tripartite motif containing 11 (TRIM11)
TRIM50	5	5	0	0	tripartite motif containing 50 (TRIM50)
TRIM66 ENSG00000166436	8	8	0	0	tripartite motif containing 66 (TRIM 66)
TRO	6	6	0	0	Trophinin (TRO)
TSAS1R1	12	12	0	0	taste receptor, type 1, member 1 (TAS1R1)
TSC22D3 ENSG00000157514	4	4	0	0	TSC22 domain family, member 3 (TSC22D3)
TSKU	4	4	0	0	tsukushi, small leucine rich proteoglycan (TSKU)
TSPY26P TSPYL3	7	7	0	0	Testis Specific Protein, Y-Linked 26, Pseudogene (TSPY26P)
TSPYL5 ENSG00000180543	5	5	0	0	testis-specific Y-encoded-like protein 5 (TSPYL5)
TTC21B	6	6	0	0	tetratricopeptide repeat domain 21B (TTC21B)
TTC37 KIAA0372 ENSG00000198677	4	4	0	0	tetratricopeptide repeat protein 37 (TTC37)
TTF1	5	5	0	0	transcription termination factor 1 (TTF1)
TTF2 ENSG00000116830	4	4	0	0	transcription termination factor 2 (TTF2)
TXNRD2	4	4	0	0	thioredoxin reductase 2 (TXNRD2)
TYK2	7	7	0	0	tyrosine kinase non-receptor 2 (TYK2)
TYW1 ENSG00000198874	6	6	0	0	tRNA wybutosine-synthesizing protein 1 (TYW1)
UBC;RPS27A;UBB UBB;RPS27A;UBC	7	7	0	0	ubiquitin C (UBC)
UBR2 ENSG00000024048	6	6	0	0	E3 ubiquitin-protein ligase UBR2
UCN ENSG00000163794	4	4	0	0	urocortin (UCN)
ULK1	4	4	0	0	unc-51 like autophagy activating kinase 1 (ULK1)
UNC80	4	4	0	0	UNC80
USP10	4	4	0	0	ubiquitin carboxyl-terminal hydrolase 10 (USP10)
USP17L2 DUB3 ENSG00000182945 ENSG00000223443	7	7	0	0	ubiquitin carboxyl-terminal hydrolase 17-like protein 2 (USP17L2)
USP39	17	17	0	0	Ubiquitin specific peptidase 39 (USP39)
USP4 ENSG00000114316	5	5	0	0	Ubiquitin specific peptidase 4 (USP4)
USP44	4	4	0	0	Ubiquitin carboxyl-terminal hydrolase 44 (USP44)
USP9X	4	4	0	0	ubiquitin specific peptidase 9 (USP9X)
UTP14A	7	7	0	0	U3 small nucleolar RNA-associated protein 14 homolog A (UTP14A)
VPS13C ENSG00000129003	22	22	0	0	vacuolar protein sorting-associated protein 13C (VPS13C)
VWA3A	4	4	0	0	von Willebrand factor A domain containing 3A (VWA3A)
WEE1	4	4	0	0	WEE1
WHSC1	4	4	0	0	probable histone-lysine N-methyltransferase NSD2 isoform 1 (WHSC1)
YEATS2	5	5	0	0	YEATS2
ZBTB7A ENSG00000178951	5	5	0	0	ZBTB7A
ZCCHC6 ENSG00000083223	11	11	0	0	zinc finger CCHC domain containing 6 (ZCCHC6)
ZFP557	10	10	0	0	Zinc finger protein 557 (ZNF557)
ZNF142	74	74	0	0	Zinc finger protein 142 (ZNF142)
ZNF148 ENSG00000163848 ENSG00000221955	6	5	0	0	Zinc finger 148 (ZNF148)
ZNF174 ENSG00000103343	7	7	0	0	zinc finger protein 174 (ZNF174)
ZNF193	5	5	0	0	zinc finger 193 (ZNF193)
ZNF236	6	6	0	0	zinc finger 236 (ZNF236)
ZNF275	5	5	0	0	zinc finger 275 (ZNF275)
ZNF320	4	4	0	0	zinc finger 320 (ZNF320)
ZNF48 ENSG00000180035	6	6	0	0	zinc finger 48 (ZNF48)
ZNF480	6	6	0	0	zinc finger 480 (ZNF480)
ZNF497	5	5	0	0	zinc finger 497 (ZNF497)
ZNF671	4	4	0	0	zinc finger protein 671 (ZNF671)
ZNF714	4	4	0	0	zinc finger protein 714 (ZNF714)
ZNF738	5	5	0	0	zinc finger protein 738 (ZNF738)
ZNF765	4	4	0	0	zinc finger protein 765 (ZNF765)
ZNF77	5	5	0	0	zinc finger protein 77 (ZNF77)
ZNFX1 ENSG00000124201	14	14	0	0	NFX1-type zinc finger-containing protein 1 (ZNFX1)
ZRANB3	12	12	0	0	zinc finger RAN-binding domain containing 3 (ZRANB3)
ZRANB3 ENSG00000121988	11	11	0	0	zinc finger, RAN-binding domain containing 3 (ZRANB3)
ZSCAN9 ZNF193 ENSG00000137185	5	5	0	0	zinc finger protein 193 (ZNF193)
ZSWIM8 KIAA0913	12	12	0	0	ZSWIM8

## Sheet: enriched at c.s. by A-769662
GeneSymbol	Total Protein Identification count (peptides)	total basal peptide identification	total A-769662-treated peptide identifications	total background peptide identifications	Protein description
ADAM3A	4	0	4	0	(ADAM3A)
ADAMTS18	5	0	5	0	ADAM metallopeptidase with thrombospondin type 1 motif, 18 (ADAMTS18)
ADCY7	4	0	4	0	Adenylate cyclase type 7 (ADCY7)
AICDA ENSG00000111732	5	0	5	0	activation-induced deaminase (AICDA)
AKAP11 ENSG00000023516	4	0	4	0	A kinase (PRKA) anchor protein 11 (AKAP11)
ASH1L ENSG00000116539	10	0	10	0	ASH1L
CAPN11	4	0	4	0	calpain 11 (CAPN11)
CCDC150	8	0	8	0	coiled-coil containing 150 (CCDC150)
CCDC22	4	0	4	0	coiled-coil domain containing 22 (CCDC22)
CENTD2 ARAP1 ENSG00000186635	4	0	4	0	ArfGAP With RhoGAP Domain, Ankyrin Repeat And PH Domain (ARAP1, centaurin-delta-1)
CHN1	4	0	4	0	chimerin 1 (CHN1)
CLEC16A ENSG00000038532	11	0	11	0	CLEC16A
COL22A1	6	0	6	0	Collagen 22A1 (COL22A1)
DDX4 ENSG00000152670	9	0	9	0	ATP-dependent RNA helicase DDX4
DDX47 ENSG00000213782	4	0	4	0	probable ATP-dependent RNA helicase DDX47
DENND1B ENSG00000162701	4	0	4	0	DENN/MADD Domain Containing 1B (DENND1B)
DKFZp564F123	5	0	5	0	hypothetical protein (DKFZp564F123)
DOT1L ENSG00000104885	7	0	7	0	histone-lysine N-methyltransferase (DOT1L)
DZIP3 ENSG00000198919	6	0	6	0	E3 ubiquitin-protein ligase DZIP3
ENSG00000119596	4	0	4	0	YLP motif-containing protein 1 (YLPM1)
ENSG00000123213	5	0	5	0	neurolysin (metallopeptidase M3 family, NLN)
ENSG00000128656	4	0	4	0	chimerin 1 (CHN1)
ENSG00000144395	8	0	8	0	coiled-coil domain containing 150 (CCDC150)
ENSG00000158987	4	0	4	0	Rap guanine nucleotide exchange factor 6 (RAPGEF6)
ENSG00000169436	6	0	6	0	Collagen 22A1 (COL22A1)
ENSG00000176809	4	0	4	0	leucine rich repeat containing 37, member A3 (LRRC37A3)
ENSG00000189090 ENSG00000197910 ENSG00000188279 ENSG00000188100	5	0	5	0	family with sequence similarity 25, member c (FAM25C)
ENSG00000204991	5	0	5	0	spire-type actin nucleation factor 2 (SPIRE2)
ENSG00000257774	4	0	4	0	hypothetical protein (ENSG00000257774)
FAM25D LOC643479;FAM25E;FAM25D	5	0	5	0	family with sequence similarity 25, member d (FAM25D)
FAN1 MTMR15	5	0	5	0	FAN1 (MTMR15)
GOLGB1	4	0	4	0	Golbin B1 (GOLGB1)
HDGFRP3	5	0	5	0	hepatoma-derived growth factor related protein 3 (HDGFRP3)
HLA-C	8	0	8	0	HLA-C
HOXD12	8	0	6	0	homeobox D12 (HOXD12)
INADL ENSG00000132849	4	0	4	0	InaD-like (INADL)
JPH3 ENSG00000154118	4	0	4	0	Junctophilin 3 (JPH3)
KIF21B	4	0	4	0	Kinesin-like protein KIF21B
LMAN1L ENSG00000140506	4	0	4	0	lectin mannose-binding 1 like (LMAN1L)
LOC100287115	5	0	5	0	hypothetical protein (LOC100287115)
LOC100290150;LOC100288275	5	0	5	0	hypothetical protein (LOC100290150)
LOC100292533	4	0	4	0	hypothetical protein (LOC100292533)
LOC100293055	6	0	6	0	LOC100293055
LOC100294335	6	0	6	0	hypothetical protein (LOC100294335)
LOC101927681	5	0	5	0	LOC101927681
LOC101927681	5	0	5	0	hypothetical protein (hCG1778643)
LRRC37A2	7	0	7	0	leucine rich repeat containing 37, member A2 (LRRC37A2)
LTBP3 ENSG00000168056	8	0	8	0	latent-transforming growth factor beta-binding protein 3 (LTBP3)
MAP7D1	4	0	4	0	MAP7 domain containing 1 (MAP7D1)
MICAL2 ENSG00000133816	4	0	4	0	microtubule associated monoxygenase calponin and LIM domain containing 2 (MICAL2)
MLLT4	13	0	13	0	myeloid/lymphoid or mixed-lineage leukemia, translocated to 4 (MLLT4, AF-6)
MUSK ENSG00000030304	4	0	4	0	Muscle, Skeletal, Receptor Tyrosine Kinase (MUSK)
MYH13	16	0	16	0	Myosin-13
NAT6 HYAL3	8	0	8	0	HYAL3 (NAT6)
NCOR1 ENSG00000141027	5	0	5	0	NCOR1
NELF	5	0	5	0	NELF
NLN ENSG00000123213	5	0	5	0	neurolysin (metallopeptidase M3 family, NLN)
NUCB1 ENSG00000104805	4	0	4	0	nucleobindin 1 (NUCB1)
PAPOLG	5	0	4	0	poly(A) polymerase gamma (PAPOLG)
PDZD2 ENSG00000133401	6	0	6	0	PDZ domain-containing protein 2 (PDZD2)
PGAP1 ENSG00000197121	4	0	4	0	GPI inositol-deacylase (PGAP1)
PHF2	13	0	13	0	PHD finger protein 2 (PHF2)
PIK3R1	4	0	4	0	phosphoinositide-3-kinase regulatory subunit 1 (p85 alpha, PIK3R1)
PIM3	4	0	4	0	Serine/threonine-protein kinase Pim-3
PKD1L2	4	0	4	0	polycystic kidney disease 1-like 2 (PKD1L2)
Prdm8	5	0	5	0	PR domain containing 8 (Prdm8)
RAB6A;LOC100131320	8	0	8	0	Rab6
RAPGEF6	5	0	5	0	RAPGEF6
RBM47 ENSG00000163694	4	0	4	0	RNA-binding protein 47 (RBM47)
RGPD4	4	0	4	0	RANBP2-like and GRIP domain containing 4 (RGPD4)
RPL31P57 hCG_1793136	4	0	4	0	ribosomal protein L31 pseudogene 57 (RPL31P57)
SATB1 ENSG00000182568	4	0	4	0	DNA-binding protein SATB1
SF3B1	4	0	4	0	Splicing factor 3B subunit 1 (SF3B1)
SH3PXD2A	5	0	5	0	SH3 multiple domains 1 (SH3MD1)
SNX5 ENSG00000089006	4	0	4	0	Sorting nexin 5 (SNX5)
SPECC1L CYTSA ENSG00000100014	4	0	4	0	sperm antigen with calponin homology and coiled-coil domains 1-like (SPECC1L)
SPIRE2	5	0	5	0	spire-type actin nucleation factor 2 (SPIRE2)
SRP68	8	0	8	0	SRP68
STK32C ENSG00000165752	4	0	4	0	serine/threonine-protein kinase 32C (STK32c)
TDRD9	5	0	5	0	tudor domain containing 9 (TDRD9)
TRIOBP	4	0	4	0	TRIO and F-actin-binding protein (TRIOBP)
TTC16	11	0	11	0	TTC16
TWF2 ENSG00000247596	8	0	8	0	twinfilin-2
USP12	6	0	6	0	USP12
VCPIP1 ENSG00000175073	4	0	4	0	deubiquitinating protein VCIP135
WDR70 ENSG00000082068	6	0	6	0	WD repeat-containing protein 70 (WDR70)
XPNPEP3 ENSG00000196236	5	0	5	0	X-prolyl aminopeptidase (aminopeptidase P) 3 (XPNPEP3)
XPNPEP3 ENSG00000196236	4	0	4	0	X-prolyl aminopeptidase (aminopeptidase P) 3 (XPNPEP3)
YLPM1 ENSG00000119596	4	0	4	0	YLP motif-containing protein 1 (YLPM1)
ZCCHC11 ENSG00000134744	5	0	5	0	zinc finger, CCHC domain containing 11 (ZCCHC11)
ZFYVE1 ENSG00000165861	10	0	10	0	zinc finger FYVE domain containing 1 (ZFYVE1)
ZNF609	7	0	7	0	zinc finger protein 609 (ZNF609)
ZSWIM5 ENSG00000162415	6	0	6	0	zinc finger SWIM domain-containing protein 5 (ZSWIM5)

## Sheet: unchanged at c.s. by A-769662
GeneSymbol	Total Protein Identification count (peptides)	total basal peptide identification	total A-769662-treated peptide identifications	total background peptide identifications	Protein description
AEBP1 ENSG00000106624	7	3	1	0	adipocyte enhancer-binding protein 1 (AEBP1) precursor
AKR1B1 ENSG00000085662	4	4	1	0	aldo-keto reductase family 1 member B1 (AKR1b1)
ALOX5	4	1	2	0	arachidonate 5-lipoxygenase (ALOX5)
AMOTL1	7	2	8	0	angiomiotin like 1 (AMOTL1)
ANLN	4	9	2	0	anillin (ANLN)
ANO2	5	7	3	0	Anoctamin-2 (ANO2)
ANXA13	4	11	2	0	annexin A13 (ANXA13)
AP3D1	12	5	2	0	adaptor-related protein complex 3, delta 1 subunit (AP3D1)
AXIN2	4	1	3	0	axin 2 (AXIN2)
BOD1L1 FAM44A ENSG00000038219	4	13	4	0	biorientation of chromosomes in cell division protein 1-like (BOD1L1)
c-myb	22	3	1	0	c-myb
C10orf71 ENSG00000177354	4	6	2	0	c10orf71
C22orf30	5	4	1	0	C22orf30
C22orf32	5	1	3	0	C22orf32
C5orf44	12	6	1	0	C5orf44
C6orf10 ENSG00000204296	7	4	1	0	C6orf10
CAND1 ENSG00000111530	5	1	3	0	cullin-associated and neddylation-dissociated 1 (CAND1)
CAPN3	4	4	1	0	calpain 3
CCL13 ENSG00000181374	4	5	1	0	chemokine (C-C motif) ligand 13 (CCL13)
CCPG1	4	6	2	0	cell cycle progression protein 1 (CCPG1)
CLASP2	10	3	9	0	cytoplasmic linker associated protein 2 (CLASP2)
CNTN3 ENSG00000113805	7	3	1	0	contactin 3 (CNTN3)
DEPTOR	6	6	2	0	DEP domain containing MTOR-interacting protein (DEPTOR)
DKK3	7	5	1	0	dickkopf WNT signaling pathway inhibitor 3 (DKK3)
DNAH17	4	3	9	0	dynein, axonemal, heavy chain 17 (DNAH17)
DNAH5 ENSG00000039139	5	17	5	0	dynein, axonemal, heavy chain 5 (DNAH5)
DOCK11 ENSG00000147251	5	4	1	0	dedicator of cytokinesis 11 (DOCK11)
DYNC2H1 ENSG00000214332	6	1	4	0	dynein, cytoplasmic 2, heavy chain 1 (DYNC2H1)
EFTUD1	9	1	3	0	elongation factor Tu GTP binding domain containing 1 (EFTUD1)
ENSG00000047346	10	3	1	0	family with sequence similarity 214, member A (FAM214A)
ENSG00000069712	4	3	1	0	KIAA1107
ENSG00000092529	4	4	1	0	calpain 3 (CAPN3)
ENSG00000104537	10	11	2	0	annexin A13 (ANXA13)
ENSG00000113597	5	6	1	0	trafficking protein particle complex 13 (TRAPPC13)
ENSG00000128645	13	3	1	0	homeobox D1 (HOXD1)
ENSG00000139767	19	2	4	0	serine/arginine repetitive matrix 4 (SRRM4)
ENSG00000163539	7	1	6	0	cytoplasmic linker associated protein 2 (CLASP2)
ENSG00000165271	6	4	1	0	nucleolar protein 6 (NOL6)
ENSG00000182621	10	6	2	0	phospholipase C, beta 1 (PLCB1)
ENSG00000187240	7	3	1	0
ENSG00000214248	11	2	4	0	dynein, cytoplasmic 2, heavy chain 1 (DYNC2H1)
FAM214A KIAA1370 ENSG00000047346	7	3	1	0	family with sequence similarity 214, member A (FAM214A)
FAT4	5	11	4	0	FAT atypical cadherin 4 (FAT4)
FKBP2 ENSG00000173486	9	3	1	0	FK506 binding protein 2 (FKBP2)
FN3K ENSG00000167363	4	6	1	0	fructosamine-3-kinase (FN3K)
FOXN3-AS1	5	3	1	0	forkhead box N3 (FOXN3)
FYTTD1	4	5	2	0	forty-two-three domain containing 1 (FYTTD1)
GRM1	5	3	1	0	glutamate receptor metabotropic 1 (GRM1)
GTPBP1 ENSG00000100226	7	10	1	0	GTP-binding protein 1 (GTPB1)
HDLBP	7	7	1	0	high density lipoprotein binding protein (HDLBP)
HIPK3 ENSG00000110422	4	16	3	0	homeodomain interacting protein kinase 3 (HIPK3)
INADL ENSG00000132849	6	1	4	0	InaD-like (INADL)
IQCJ-SCHIP1 ENSG00000250588	9	3	1	0	schwannomin interacting protein 1 (SCHIP1)
KCNH7	11	4	1	0	potassium voltage-gated channel subfamily H member 7 (KCNH7)
KIF18B	4	3	1	0	kinesin family member 18B (KIF18B)
KLC3	8	5	1	0	kinesin light chain 3 (KLC3)
LGALS3	5	1	4	0	lectin, galactoside-binding soluble 3 (LGALS3)
LOC100288382	4	2	7	0	LOC100288382
LOC100293478	4	3	1	0	LOC100293478
LOC101929372 SLC25A18	6	4	8	0	solute carrier family 25 (glutamate carrier) member 18 (SLC25A18)
LOC101930171 LOC101930165 LOC102725042 TCEB3CL;TCEB3C	17	4	1	0	transcription elongation factor B polypeptide 3C (elongin A3) (TCEB3C)
LOC285679	5	1	2	0	LOC285679
LRRC8C	5	3	1	0	leucine-rich repeat-containing protein 8C (LRRC8C)
MLKL ENSG00000168404	4	5	2	0	mixed lineage kinase domain-like protein isoform 1 (MLKL)
MYB	7	3	1	0	myb
NUCB1	4	10	3	0	nucleobindin-1 (NUCB1)
P2RX5 ENSG00000083454	4	2	5	0	purinergic receptor P2X, ligand-gated ion channel, 5 (P2RX5)
PAP2 MYBBP1A	7	3	1	0	p53-activated protein-2 (PAP2)
PARP4	4	3	1	0	Poly [ADP-ribose] polymerase 4 (PARP4)
PDS5B ENSG00000083642	8	1	3	0	PDS5B
PLCB1 ENSG00000182621	6	6	2	0	phospholipase C, beta 1 (PLCB1)
PLXNB2	10	3	1	0	plexin B2 (PLXNB2)
PPP1R12C	5	1	7	0	protein phosphatase 1, regulatory subunit 12C
RAI1 ENSG00000108557	4	7	14	0	retinoic acid induced 1 (RAI1)
RGPD5 RGPD6 HEL161 RGPD5;RGPD6 RGPD8;RGPD6;RGPD5 ENSG00000183054 ENSG00000015568	4	1	3	0	RANBP2-like and GRIP domain containing 5 (RGPD5)
RNASEH2B	4	2	5	0	ribonuclease H2, subunit B (RNASEH2B)
RPS6KC1 ENSG00000136643	20	7	1	0	ribosomal protein S6 kinase (RPS6KC1)
SCHIP1 ENSG00000250588	19	3	1	0	schwannomin interacting protein 1 (SCHIP1)
SDK1	4	3	1	0	sidekick cell adhesion molecule 1 (SDK1)
SIGLEC7	12	5	1	0	sialic acid binding Ig-like lectin 7 (SIGLEC7)
SNX22	8	16	4	0	sorting nexin 22 (SNX22)
TAX1BP3	4	2	5	0	Tax1 binding protein 3 (TAX1BP3)
TDGF1P3 TDGF3	7	1	3	0	TDGF3
TEP1	7	2	5	0	telomerase-associated protein 1 (TEP1)
TRAPPC13 C5orf44 FLJ13611 ENSG00000113597	4	6	1	0	trafficking protein particle complex 13 (TRAPPC13)
TRIOBP	4	2	5	0	TRIO and F-actin binding protein
TRMT10C RG9MTD1 ENSG00000174173	4	1	3	0	tRNA methyltransferase 10 homolog C (TRMT10C)
TXLNG CXorf15	13	5	2	0	taxilin gamma (TXLNG)
VAC14	4	6	13	0	VAC14
WWC2 ENSG00000151718	12	6	2	0	WW and C2 domain containing 2
ZCCHC11	15	2	8	0	zinc finger, CCHC domain containing 11 (ZCCHC11)
ZNF197 ENSG00000186448	6	4	1	0	zinc finger protein 197 (ZNF197)
