# Supplementary material for: AMP-Activated Protein Kinase Regulates the Cell Surface Proteome and Integrin Membrane Traffic
Source: PLoS One. 2015 May 26;10(5):e0128013. doi: 10.1371/journal.pone.0128013 (PMC4444004; doi:10.1371/journal.pone.0128013)
Supplement: S4 Table — Shown are the following for parent ions (first tab): m/z, peptide charge, number of missed cleavages; and for MS/MS fragments (second tab): m/z of parent ion, m/z of each fragment and fragment intensity (shown in attached. xls document). (XLSX) [file pone.0128013.s004.xlsx]

## Sheet: Parent ions
PeptideSequence	PrecursorMass (m/z)	PeptideCharge	Peptide Mass	MissedCleavages	TreatmentName	filePath	SampleName	Extension	title
IMVNAALQRQFHSPFIFR	726.333	3	2176	1	CTRL2	D:\AmpK_Pass2\AmpKPass3\CTRL2	CTRL2_300ID_ZORBAX_ZED_TT_03Apr2014	.MSF	File26836 Spectrum12796 scans: 12523
VILFTMHNNR	416.268	3	1245.8	0	CTRL2	D:\AmpK_Pass2\AmpKPass3\CTRL2	CTRL2_300ID_ZORBAX_ZED_TT_03Apr2014	.MSF	File26836 Spectrum5848 scans: 5912
KVMIVITDGESHDSPDLEK	705.921	3	2114.76	1	CTRL3	D:\AmpK_Pass2\AmpKPass3\CTRL3	CTRL3_300ID_ZORBAX_ZED_TT_03Apr2014	.MSF	File26838 Spectrum12532 scans: 12418
QIVFEISK	321.392	3	961.177	0	CTRL3	D:\AmpK_Pass2\AmpKPass3\CTRL3	CTRL3_300ID_ZORBAX_ZED_TT_03Apr2014	.MSF	File26838 Spectrum6248 scans: 6447
IMVNAALQRQFHSPFIFR	726.255	3	2175.77	1	CTRL3	D:\AmpK_Pass2\AmpKPass3\CTRL3	CTRL3_300ID_ZORBAX_ZED_TT_03Apr2014	.MSF	File26838 Spectrum11666 scans: 11744
LGLSLATNPK	506.002	2	1010	0	CTRL3	D:\AmpK_Pass2\AmpKPass3\CTRL3	CTRL3_300ID_ZORBAX_ZED_TT_03Apr2014	.MSF	File26838 Spectrum11682 scans: 11758
FGSSIASVR	308.973	3	923.92	0	CTRL5	D:\AmpK_Pass2\AmpKPass3\CTRL5	CTRL5_300ID_ZORBAX_ZED_TT_29May2014	.MSF	File27406 Spectrum4208 scans: 4679
APQLNHSNSDVVSINCNIR	693.546	3	2077.64	0	CTRL5	D:\AmpK_Pass2\AmpKPass3\CTRL5	CTRL5_300ID_ZORBAX_ZED_TT_29May2014	.MSF	File27406 Spectrum5799 scans: 6103
IMVNAALQRQFHSPFIFR
VILFTMHNNR
KVMIVITDGESHDSPDLEK
QIVFEISK
IMVNAALQRQFHSPFIFR #2
LGLSLATNPK
FGSSIASVR
APQLNHSNSDVVSINCNIR

## Sheet: Parent ions and MSMS fragments
PeptideSequence	TreatmentName	File Path	sampleName	PeptideMass	Peptideintensity	PeptideCharge	PrecursorID	IonNumber	IonMass	IonIntensity
APQLNHSNSDVVSINCNIR	CTRL5	D:\AmpK_Pass2\AmpKPass3\CTRL5	CTRL5_300ID_ZORBAX_ZED_TT_29May2014	2077.64	20662.2	3	68814	158	675.49	38.164
APQLNHSNSDVVSINCNIR	CTRL5	D:\AmpK_Pass2\AmpKPass3\CTRL5	CTRL5_300ID_ZORBAX_ZED_TT_29May2014	2077.64	20662.2	3	68814	148	663.503	31.8811
APQLNHSNSDVVSINCNIR	CTRL5	D:\AmpK_Pass2\AmpKPass3\CTRL5	CTRL5_300ID_ZORBAX_ZED_TT_29May2014	2077.64	20662.2	3	68814	127	633.006	30.4473
APQLNHSNSDVVSINCNIR	CTRL5	D:\AmpK_Pass2\AmpKPass3\CTRL5	CTRL5_300ID_ZORBAX_ZED_TT_29May2014	2077.64	20662.2	3	68814	137	646.942	27.9568
APQLNHSNSDVVSINCNIR	CTRL5	D:\AmpK_Pass2\AmpKPass3\CTRL5	CTRL5_300ID_ZORBAX_ZED_TT_29May2014	2077.64	20662.2	3	68814	159	676.499	25.7786
APQLNHSNSDVVSINCNIR	CTRL5	D:\AmpK_Pass2\AmpKPass3\CTRL5	CTRL5_300ID_ZORBAX_ZED_TT_29May2014	2077.64	20662.2	3	68814	157	674.827	25.3362
APQLNHSNSDVVSINCNIR	CTRL5	D:\AmpK_Pass2\AmpKPass3\CTRL5	CTRL5_300ID_ZORBAX_ZED_TT_29May2014	2077.64	20662.2	3	68814	139	649.209	24.1425
APQLNHSNSDVVSINCNIR	CTRL5	D:\AmpK_Pass2\AmpKPass3\CTRL5	CTRL5_300ID_ZORBAX_ZED_TT_29May2014	2077.64	20662.2	3	68814	146	661.107	23.338
APQLNHSNSDVVSINCNIR	CTRL5	D:\AmpK_Pass2\AmpKPass3\CTRL5	CTRL5_300ID_ZORBAX_ZED_TT_29May2014	2077.64	20662.2	3	68814	138	647.76	23.0913
APQLNHSNSDVVSINCNIR	CTRL5	D:\AmpK_Pass2\AmpKPass3\CTRL5	CTRL5_300ID_ZORBAX_ZED_TT_29May2014	2077.64	20662.2	3	68814	143	656.995	20.1175
APQLNHSNSDVVSINCNIR	CTRL5	D:\AmpK_Pass2\AmpKPass3\CTRL5	CTRL5_300ID_ZORBAX_ZED_TT_29May2014	2077.64	20662.2	3	68814	184	825.181	19.0005
APQLNHSNSDVVSINCNIR	CTRL5	D:\AmpK_Pass2\AmpKPass3\CTRL5	CTRL5_300ID_ZORBAX_ZED_TT_29May2014	2077.64	20662.2	3	68814	108	597.471	18.4958
APQLNHSNSDVVSINCNIR	CTRL5	D:\AmpK_Pass2\AmpKPass3\CTRL5	CTRL5_300ID_ZORBAX_ZED_TT_29May2014	2077.64	20662.2	3	68814	154	670.266	17.9532
APQLNHSNSDVVSINCNIR	CTRL5	D:\AmpK_Pass2\AmpKPass3\CTRL5	CTRL5_300ID_ZORBAX_ZED_TT_29May2014	2077.64	20662.2	3	68814	155	671.034	16.8524
APQLNHSNSDVVSINCNIR	CTRL5	D:\AmpK_Pass2\AmpKPass3\CTRL5	CTRL5_300ID_ZORBAX_ZED_TT_29May2014	2077.64	20662.2	3	68814	119	619.399	16.6569
APQLNHSNSDVVSINCNIR	CTRL5	D:\AmpK_Pass2\AmpKPass3\CTRL5	CTRL5_300ID_ZORBAX_ZED_TT_29May2014	2077.64	20662.2	3	68814	121	622.216	14.6705
APQLNHSNSDVVSINCNIR	CTRL5	D:\AmpK_Pass2\AmpKPass3\CTRL5	CTRL5_300ID_ZORBAX_ZED_TT_29May2014	2077.64	20662.2	3	68814	162	679.488	13.9179
APQLNHSNSDVVSINCNIR	CTRL5	D:\AmpK_Pass2\AmpKPass3\CTRL5	CTRL5_300ID_ZORBAX_ZED_TT_29May2014	2077.64	20662.2	3	68814	182	816.56	13.7809
APQLNHSNSDVVSINCNIR	CTRL5	D:\AmpK_Pass2\AmpKPass3\CTRL5	CTRL5_300ID_ZORBAX_ZED_TT_29May2014	2077.64	20662.2	3	68814	140	650.373	13.452
APQLNHSNSDVVSINCNIR	CTRL5	D:\AmpK_Pass2\AmpKPass3\CTRL5	CTRL5_300ID_ZORBAX_ZED_TT_29May2014	2077.64	20662.2	3	68814	69	517.547	13.4225
APQLNHSNSDVVSINCNIR	CTRL5	D:\AmpK_Pass2\AmpKPass3\CTRL5	CTRL5_300ID_ZORBAX_ZED_TT_29May2014	2077.64	20662.2	3	68814	165	684.657	13.3565
APQLNHSNSDVVSINCNIR	CTRL5	D:\AmpK_Pass2\AmpKPass3\CTRL5	CTRL5_300ID_ZORBAX_ZED_TT_29May2014	2077.64	20662.2	3	68814	149	664.683	12.838
APQLNHSNSDVVSINCNIR	CTRL5	D:\AmpK_Pass2\AmpKPass3\CTRL5	CTRL5_300ID_ZORBAX_ZED_TT_29May2014	2077.64	20662.2	3	68814	178	769.464	12.8018
APQLNHSNSDVVSINCNIR	CTRL5	D:\AmpK_Pass2\AmpKPass3\CTRL5	CTRL5_300ID_ZORBAX_ZED_TT_29May2014	2077.64	20662.2	3	68814	124	628.727	12.0785
APQLNHSNSDVVSINCNIR	CTRL5	D:\AmpK_Pass2\AmpKPass3\CTRL5	CTRL5_300ID_ZORBAX_ZED_TT_29May2014	2077.64	20662.2	3	68814	70	519.74	11.8085
APQLNHSNSDVVSINCNIR	CTRL5	D:\AmpK_Pass2\AmpKPass3\CTRL5	CTRL5_300ID_ZORBAX_ZED_TT_29May2014	2077.64	20662.2	3	68814	30	401.129	11.4526
APQLNHSNSDVVSINCNIR	CTRL5	D:\AmpK_Pass2\AmpKPass3\CTRL5	CTRL5_300ID_ZORBAX_ZED_TT_29May2014	2077.64	20662.2	3	68814	163	680.787	11.3925
APQLNHSNSDVVSINCNIR	CTRL5	D:\AmpK_Pass2\AmpKPass3\CTRL5	CTRL5_300ID_ZORBAX_ZED_TT_29May2014	2077.64	20662.2	3	68814	167	693.149	11.3464
APQLNHSNSDVVSINCNIR	CTRL5	D:\AmpK_Pass2\AmpKPass3\CTRL5	CTRL5_300ID_ZORBAX_ZED_TT_29May2014	2077.64	20662.2	3	68814	216	1365.64	11.2314
APQLNHSNSDVVSINCNIR	CTRL5	D:\AmpK_Pass2\AmpKPass3\CTRL5	CTRL5_300ID_ZORBAX_ZED_TT_29May2014	2077.64	20662.2	3	68814	181	810.475	11.1769
APQLNHSNSDVVSINCNIR	CTRL5	D:\AmpK_Pass2\AmpKPass3\CTRL5	CTRL5_300ID_ZORBAX_ZED_TT_29May2014	2077.64	20662.2	3	68814	84	547.649	11.1716
APQLNHSNSDVVSINCNIR	CTRL5	D:\AmpK_Pass2\AmpKPass3\CTRL5	CTRL5_300ID_ZORBAX_ZED_TT_29May2014	2077.64	20662.2	3	68814	61	502.776	10.2643
APQLNHSNSDVVSINCNIR	CTRL5	D:\AmpK_Pass2\AmpKPass3\CTRL5	CTRL5_300ID_ZORBAX_ZED_TT_29May2014	2077.64	20662.2	3	68814	142	652.017	9.60383
APQLNHSNSDVVSINCNIR	CTRL5	D:\AmpK_Pass2\AmpKPass3\CTRL5	CTRL5_300ID_ZORBAX_ZED_TT_29May2014	2077.64	20662.2	3	68814	128	633.734	9.12581
APQLNHSNSDVVSINCNIR	CTRL5	D:\AmpK_Pass2\AmpKPass3\CTRL5	CTRL5_300ID_ZORBAX_ZED_TT_29May2014	2077.64	20662.2	3	68814	194	919.852	9.09637
APQLNHSNSDVVSINCNIR	CTRL5	D:\AmpK_Pass2\AmpKPass3\CTRL5	CTRL5_300ID_ZORBAX_ZED_TT_29May2014	2077.64	20662.2	3	68814	83	545.101	8.5685
APQLNHSNSDVVSINCNIR	CTRL5	D:\AmpK_Pass2\AmpKPass3\CTRL5	CTRL5_300ID_ZORBAX_ZED_TT_29May2014	2077.64	20662.2	3	68814	151	666.631	8.4714
APQLNHSNSDVVSINCNIR	CTRL5	D:\AmpK_Pass2\AmpKPass3\CTRL5	CTRL5_300ID_ZORBAX_ZED_TT_29May2014	2077.64	20662.2	3	68814	152	667.739	7.91164
APQLNHSNSDVVSINCNIR	CTRL5	D:\AmpK_Pass2\AmpKPass3\CTRL5	CTRL5_300ID_ZORBAX_ZED_TT_29May2014	2077.64	20662.2	3	68814	115	613.49	7.89067
APQLNHSNSDVVSINCNIR	CTRL5	D:\AmpK_Pass2\AmpKPass3\CTRL5	CTRL5_300ID_ZORBAX_ZED_TT_29May2014	2077.64	20662.2	3	68814	136	644.575	7.36232
APQLNHSNSDVVSINCNIR	CTRL5	D:\AmpK_Pass2\AmpKPass3\CTRL5	CTRL5_300ID_ZORBAX_ZED_TT_29May2014	2077.64	20662.2	3	68814	101	588.443	7.35928
APQLNHSNSDVVSINCNIR	CTRL5	D:\AmpK_Pass2\AmpKPass3\CTRL5	CTRL5_300ID_ZORBAX_ZED_TT_29May2014	2077.64	20662.2	3	68814	125	630.691	7.14082
APQLNHSNSDVVSINCNIR	CTRL5	D:\AmpK_Pass2\AmpKPass3\CTRL5	CTRL5_300ID_ZORBAX_ZED_TT_29May2014	2077.64	20662.2	3	68814	147	662.141	7.12951
APQLNHSNSDVVSINCNIR	CTRL5	D:\AmpK_Pass2\AmpKPass3\CTRL5	CTRL5_300ID_ZORBAX_ZED_TT_29May2014	2077.64	20662.2	3	68814	156	671.797	7.05202
APQLNHSNSDVVSINCNIR	CTRL5	D:\AmpK_Pass2\AmpKPass3\CTRL5	CTRL5_300ID_ZORBAX_ZED_TT_29May2014	2077.64	20662.2	3	68814	173	731.345	6.96792
APQLNHSNSDVVSINCNIR	CTRL5	D:\AmpK_Pass2\AmpKPass3\CTRL5	CTRL5_300ID_ZORBAX_ZED_TT_29May2014	2077.64	20662.2	3	68814	166	690.687	6.85004
APQLNHSNSDVVSINCNIR	CTRL5	D:\AmpK_Pass2\AmpKPass3\CTRL5	CTRL5_300ID_ZORBAX_ZED_TT_29May2014	2077.64	20662.2	3	68814	133	638.577	6.62
APQLNHSNSDVVSINCNIR	CTRL5	D:\AmpK_Pass2\AmpKPass3\CTRL5	CTRL5_300ID_ZORBAX_ZED_TT_29May2014	2077.64	20662.2	3	68814	93	570.454	5.98859
APQLNHSNSDVVSINCNIR	CTRL5	D:\AmpK_Pass2\AmpKPass3\CTRL5	CTRL5_300ID_ZORBAX_ZED_TT_29May2014	2077.64	20662.2	3	68814	116	614.784	5.94096
APQLNHSNSDVVSINCNIR	CTRL5	D:\AmpK_Pass2\AmpKPass3\CTRL5	CTRL5_300ID_ZORBAX_ZED_TT_29May2014	2077.64	20662.2	3	68814	145	660.27	5.90057
APQLNHSNSDVVSINCNIR	CTRL5	D:\AmpK_Pass2\AmpKPass3\CTRL5	CTRL5_300ID_ZORBAX_ZED_TT_29May2014	2077.64	20662.2	3	68814	213	1339.78	5.89193
APQLNHSNSDVVSINCNIR	CTRL5	D:\AmpK_Pass2\AmpKPass3\CTRL5	CTRL5_300ID_ZORBAX_ZED_TT_29May2014	2077.64	20662.2	3	68814	102	589.247	5.82251
APQLNHSNSDVVSINCNIR	CTRL5	D:\AmpK_Pass2\AmpKPass3\CTRL5	CTRL5_300ID_ZORBAX_ZED_TT_29May2014	2077.64	20662.2	3	68814	210	1162.92	5.73011
APQLNHSNSDVVSINCNIR	CTRL5	D:\AmpK_Pass2\AmpKPass3\CTRL5	CTRL5_300ID_ZORBAX_ZED_TT_29May2014	2077.64	20662.2	3	68814	24	365.28	5.67862
APQLNHSNSDVVSINCNIR	CTRL5	D:\AmpK_Pass2\AmpKPass3\CTRL5	CTRL5_300ID_ZORBAX_ZED_TT_29May2014	2077.64	20662.2	3	68814	170	715.96	5.6535
APQLNHSNSDVVSINCNIR	CTRL5	D:\AmpK_Pass2\AmpKPass3\CTRL5	CTRL5_300ID_ZORBAX_ZED_TT_29May2014	2077.64	20662.2	3	68814	169	695.381	5.51934
APQLNHSNSDVVSINCNIR	CTRL5	D:\AmpK_Pass2\AmpKPass3\CTRL5	CTRL5_300ID_ZORBAX_ZED_TT_29May2014	2077.64	20662.2	3	68814	34	409.229	5.5108
APQLNHSNSDVVSINCNIR	CTRL5	D:\AmpK_Pass2\AmpKPass3\CTRL5	CTRL5_300ID_ZORBAX_ZED_TT_29May2014	2077.64	20662.2	3	68814	123	625.592	5.44599
APQLNHSNSDVVSINCNIR	CTRL5	D:\AmpK_Pass2\AmpKPass3\CTRL5	CTRL5_300ID_ZORBAX_ZED_TT_29May2014	2077.64	20662.2	3	68814	66	507.326	5.42123
APQLNHSNSDVVSINCNIR	CTRL5	D:\AmpK_Pass2\AmpKPass3\CTRL5	CTRL5_300ID_ZORBAX_ZED_TT_29May2014	2077.64	20662.2	3	68814	183	820.719	5.22613
APQLNHSNSDVVSINCNIR	CTRL5	D:\AmpK_Pass2\AmpKPass3\CTRL5	CTRL5_300ID_ZORBAX_ZED_TT_29May2014	2077.64	20662.2	3	68814	54	471.202	5.20527
APQLNHSNSDVVSINCNIR	CTRL5	D:\AmpK_Pass2\AmpKPass3\CTRL5	CTRL5_300ID_ZORBAX_ZED_TT_29May2014	2077.64	20662.2	3	68814	47	448.318	5.10319
APQLNHSNSDVVSINCNIR	CTRL5	D:\AmpK_Pass2\AmpKPass3\CTRL5	CTRL5_300ID_ZORBAX_ZED_TT_29May2014	2077.64	20662.2	3	68814	215	1350.21	4.99313
APQLNHSNSDVVSINCNIR	CTRL5	D:\AmpK_Pass2\AmpKPass3\CTRL5	CTRL5_300ID_ZORBAX_ZED_TT_29May2014	2077.64	20662.2	3	68814	109	601.698	4.9804
APQLNHSNSDVVSINCNIR	CTRL5	D:\AmpK_Pass2\AmpKPass3\CTRL5	CTRL5_300ID_ZORBAX_ZED_TT_29May2014	2077.64	20662.2	3	68814	164	682.536	4.8965
APQLNHSNSDVVSINCNIR	CTRL5	D:\AmpK_Pass2\AmpKPass3\CTRL5	CTRL5_300ID_ZORBAX_ZED_TT_29May2014	2077.64	20662.2	3	68814	89	554.479	4.76747
APQLNHSNSDVVSINCNIR	CTRL5	D:\AmpK_Pass2\AmpKPass3\CTRL5	CTRL5_300ID_ZORBAX_ZED_TT_29May2014	2077.64	20662.2	3	68814	12	301.192	4.71056
APQLNHSNSDVVSINCNIR	CTRL5	D:\AmpK_Pass2\AmpKPass3\CTRL5	CTRL5_300ID_ZORBAX_ZED_TT_29May2014	2077.64	20662.2	3	68814	130	635.401	4.66507
APQLNHSNSDVVSINCNIR	CTRL5	D:\AmpK_Pass2\AmpKPass3\CTRL5	CTRL5_300ID_ZORBAX_ZED_TT_29May2014	2077.64	20662.2	3	68814	41	432.695	4.64991
APQLNHSNSDVVSINCNIR	CTRL5	D:\AmpK_Pass2\AmpKPass3\CTRL5	CTRL5_300ID_ZORBAX_ZED_TT_29May2014	2077.64	20662.2	3	68814	200	1005.72	4.55743
APQLNHSNSDVVSINCNIR	CTRL5	D:\AmpK_Pass2\AmpKPass3\CTRL5	CTRL5_300ID_ZORBAX_ZED_TT_29May2014	2077.64	20662.2	3	68814	207	1120.98	4.34125
APQLNHSNSDVVSINCNIR	CTRL5	D:\AmpK_Pass2\AmpKPass3\CTRL5	CTRL5_300ID_ZORBAX_ZED_TT_29May2014	2077.64	20662.2	3	68814	110	602.347	4.23932
APQLNHSNSDVVSINCNIR	CTRL5	D:\AmpK_Pass2\AmpKPass3\CTRL5	CTRL5_300ID_ZORBAX_ZED_TT_29May2014	2077.64	20662.2	3	68814	117	617.13	4.23906
APQLNHSNSDVVSINCNIR	CTRL5	D:\AmpK_Pass2\AmpKPass3\CTRL5	CTRL5_300ID_ZORBAX_ZED_TT_29May2014	2077.64	20662.2	3	68814	107	595.836	4.22187
APQLNHSNSDVVSINCNIR	CTRL5	D:\AmpK_Pass2\AmpKPass3\CTRL5	CTRL5_300ID_ZORBAX_ZED_TT_29May2014	2077.64	20662.2	3	68814	38	415.355	4.22099
APQLNHSNSDVVSINCNIR	CTRL5	D:\AmpK_Pass2\AmpKPass3\CTRL5	CTRL5_300ID_ZORBAX_ZED_TT_29May2014	2077.64	20662.2	3	68814	161	678.706	4.01576
APQLNHSNSDVVSINCNIR	CTRL5	D:\AmpK_Pass2\AmpKPass3\CTRL5	CTRL5_300ID_ZORBAX_ZED_TT_29May2014	2077.64	20662.2	3	68814	91	562.879	4.00449
APQLNHSNSDVVSINCNIR	CTRL5	D:\AmpK_Pass2\AmpKPass3\CTRL5	CTRL5_300ID_ZORBAX_ZED_TT_29May2014	2077.64	20662.2	3	68814	98	581.678	3.90949
APQLNHSNSDVVSINCNIR	CTRL5	D:\AmpK_Pass2\AmpKPass3\CTRL5	CTRL5_300ID_ZORBAX_ZED_TT_29May2014	2077.64	20662.2	3	68814	31	402.379	3.90762
APQLNHSNSDVVSINCNIR	CTRL5	D:\AmpK_Pass2\AmpKPass3\CTRL5	CTRL5_300ID_ZORBAX_ZED_TT_29May2014	2077.64	20662.2	3	68814	195	921.717	3.90487
APQLNHSNSDVVSINCNIR	CTRL5	D:\AmpK_Pass2\AmpKPass3\CTRL5	CTRL5_300ID_ZORBAX_ZED_TT_29May2014	2077.64	20662.2	3	68814	2	243.163	3.89656
APQLNHSNSDVVSINCNIR	CTRL5	D:\AmpK_Pass2\AmpKPass3\CTRL5	CTRL5_300ID_ZORBAX_ZED_TT_29May2014	2077.64	20662.2	3	68814	132	637.399	3.89403
APQLNHSNSDVVSINCNIR	CTRL5	D:\AmpK_Pass2\AmpKPass3\CTRL5	CTRL5_300ID_ZORBAX_ZED_TT_29May2014	2077.64	20662.2	3	68814	104	590.971	3.81024
APQLNHSNSDVVSINCNIR	CTRL5	D:\AmpK_Pass2\AmpKPass3\CTRL5	CTRL5_300ID_ZORBAX_ZED_TT_29May2014	2077.64	20662.2	3	68814	48	452.387	3.68781
APQLNHSNSDVVSINCNIR	CTRL5	D:\AmpK_Pass2\AmpKPass3\CTRL5	CTRL5_300ID_ZORBAX_ZED_TT_29May2014	2077.64	20662.2	3	68814	37	414.361	3.68352
APQLNHSNSDVVSINCNIR	CTRL5	D:\AmpK_Pass2\AmpKPass3\CTRL5	CTRL5_300ID_ZORBAX_ZED_TT_29May2014	2077.64	20662.2	3	68814	44	441.376	3.59575
APQLNHSNSDVVSINCNIR	CTRL5	D:\AmpK_Pass2\AmpKPass3\CTRL5	CTRL5_300ID_ZORBAX_ZED_TT_29May2014	2077.64	20662.2	3	68814	192	909.547	3.58037
APQLNHSNSDVVSINCNIR	CTRL5	D:\AmpK_Pass2\AmpKPass3\CTRL5	CTRL5_300ID_ZORBAX_ZED_TT_29May2014	2077.64	20662.2	3	68814	177	759.982	3.52402
APQLNHSNSDVVSINCNIR	CTRL5	D:\AmpK_Pass2\AmpKPass3\CTRL5	CTRL5_300ID_ZORBAX_ZED_TT_29May2014	2077.64	20662.2	3	68814	6	254.29	3.47245
APQLNHSNSDVVSINCNIR	CTRL5	D:\AmpK_Pass2\AmpKPass3\CTRL5	CTRL5_300ID_ZORBAX_ZED_TT_29May2014	2077.64	20662.2	3	68814	75	526.458	3.46642
APQLNHSNSDVVSINCNIR	CTRL5	D:\AmpK_Pass2\AmpKPass3\CTRL5	CTRL5_300ID_ZORBAX_ZED_TT_29May2014	2077.64	20662.2	3	68814	122	624.489	3.41277
APQLNHSNSDVVSINCNIR	CTRL5	D:\AmpK_Pass2\AmpKPass3\CTRL5	CTRL5_300ID_ZORBAX_ZED_TT_29May2014	2077.64	20662.2	3	68814	105	593.307	3.33671
APQLNHSNSDVVSINCNIR	CTRL5	D:\AmpK_Pass2\AmpKPass3\CTRL5	CTRL5_300ID_ZORBAX_ZED_TT_29May2014	2077.64	20662.2	3	68814	103	590.068	3.29475
APQLNHSNSDVVSINCNIR	CTRL5	D:\AmpK_Pass2\AmpKPass3\CTRL5	CTRL5_300ID_ZORBAX_ZED_TT_29May2014	2077.64	20662.2	3	68814	5	253.316	3.28579
APQLNHSNSDVVSINCNIR	CTRL5	D:\AmpK_Pass2\AmpKPass3\CTRL5	CTRL5_300ID_ZORBAX_ZED_TT_29May2014	2077.64	20662.2	3	68814	33	408.365	3.25332
APQLNHSNSDVVSINCNIR	CTRL5	D:\AmpK_Pass2\AmpKPass3\CTRL5	CTRL5_300ID_ZORBAX_ZED_TT_29May2014	2077.64	20662.2	3	68814	99	584.631	3.25251
APQLNHSNSDVVSINCNIR	CTRL5	D:\AmpK_Pass2\AmpKPass3\CTRL5	CTRL5_300ID_ZORBAX_ZED_TT_29May2014	2077.64	20662.2	3	68814	129	634.46	3.18103
APQLNHSNSDVVSINCNIR	CTRL5	D:\AmpK_Pass2\AmpKPass3\CTRL5	CTRL5_300ID_ZORBAX_ZED_TT_29May2014	2077.64	20662.2	3	68814	180	801.305	3.14508
APQLNHSNSDVVSINCNIR	CTRL5	D:\AmpK_Pass2\AmpKPass3\CTRL5	CTRL5_300ID_ZORBAX_ZED_TT_29May2014	2077.64	20662.2	3	68814	160	677.987	3.13676
APQLNHSNSDVVSINCNIR	CTRL5	D:\AmpK_Pass2\AmpKPass3\CTRL5	CTRL5_300ID_ZORBAX_ZED_TT_29May2014	2077.64	20662.2	3	68814	88	551.612	2.93105
APQLNHSNSDVVSINCNIR	CTRL5	D:\AmpK_Pass2\AmpKPass3\CTRL5	CTRL5_300ID_ZORBAX_ZED_TT_29May2014	2077.64	20662.2	3	68814	22	354.426	2.86186
APQLNHSNSDVVSINCNIR	CTRL5	D:\AmpK_Pass2\AmpKPass3\CTRL5	CTRL5_300ID_ZORBAX_ZED_TT_29May2014	2077.64	20662.2	3	68814	85	548.287	2.80923
APQLNHSNSDVVSINCNIR	CTRL5	D:\AmpK_Pass2\AmpKPass3\CTRL5	CTRL5_300ID_ZORBAX_ZED_TT_29May2014	2077.64	20662.2	3	68814	118	617.88	2.7101
APQLNHSNSDVVSINCNIR	CTRL5	D:\AmpK_Pass2\AmpKPass3\CTRL5	CTRL5_300ID_ZORBAX_ZED_TT_29May2014	2077.64	20662.2	3	68814	168	693.829	2.69559
APQLNHSNSDVVSINCNIR	CTRL5	D:\AmpK_Pass2\AmpKPass3\CTRL5	CTRL5_300ID_ZORBAX_ZED_TT_29May2014	2077.64	20662.2	3	68814	202	1015.82	2.63577
APQLNHSNSDVVSINCNIR	CTRL5	D:\AmpK_Pass2\AmpKPass3\CTRL5	CTRL5_300ID_ZORBAX_ZED_TT_29May2014	2077.64	20662.2	3	68814	23	361.371	2.62377
APQLNHSNSDVVSINCNIR	CTRL5	D:\AmpK_Pass2\AmpKPass3\CTRL5	CTRL5_300ID_ZORBAX_ZED_TT_29May2014	2077.64	20662.2	3	68814	94	571.087	2.61632
APQLNHSNSDVVSINCNIR	CTRL5	D:\AmpK_Pass2\AmpKPass3\CTRL5	CTRL5_300ID_ZORBAX_ZED_TT_29May2014	2077.64	20662.2	3	68814	29	389.352	2.60582
APQLNHSNSDVVSINCNIR	CTRL5	D:\AmpK_Pass2\AmpKPass3\CTRL5	CTRL5_300ID_ZORBAX_ZED_TT_29May2014	2077.64	20662.2	3	68814	95	573.471	2.6042
APQLNHSNSDVVSINCNIR	CTRL5	D:\AmpK_Pass2\AmpKPass3\CTRL5	CTRL5_300ID_ZORBAX_ZED_TT_29May2014	2077.64	20662.2	3	68814	113	607.777	2.52191
APQLNHSNSDVVSINCNIR	CTRL5	D:\AmpK_Pass2\AmpKPass3\CTRL5	CTRL5_300ID_ZORBAX_ZED_TT_29May2014	2077.64	20662.2	3	68814	214	1348.75	2.49832
APQLNHSNSDVVSINCNIR	CTRL5	D:\AmpK_Pass2\AmpKPass3\CTRL5	CTRL5_300ID_ZORBAX_ZED_TT_29May2014	2077.64	20662.2	3	68814	71	521.065	2.49658
APQLNHSNSDVVSINCNIR	CTRL5	D:\AmpK_Pass2\AmpKPass3\CTRL5	CTRL5_300ID_ZORBAX_ZED_TT_29May2014	2077.64	20662.2	3	68814	64	505.244	2.49023
APQLNHSNSDVVSINCNIR	CTRL5	D:\AmpK_Pass2\AmpKPass3\CTRL5	CTRL5_300ID_ZORBAX_ZED_TT_29May2014	2077.64	20662.2	3	68814	55	473.916	2.40934
APQLNHSNSDVVSINCNIR	CTRL5	D:\AmpK_Pass2\AmpKPass3\CTRL5	CTRL5_300ID_ZORBAX_ZED_TT_29May2014	2077.64	20662.2	3	68814	131	636.588	2.39023
APQLNHSNSDVVSINCNIR	CTRL5	D:\AmpK_Pass2\AmpKPass3\CTRL5	CTRL5_300ID_ZORBAX_ZED_TT_29May2014	2077.64	20662.2	3	68814	14	322.93	2.38951
APQLNHSNSDVVSINCNIR	CTRL5	D:\AmpK_Pass2\AmpKPass3\CTRL5	CTRL5_300ID_ZORBAX_ZED_TT_29May2014	2077.64	20662.2	3	68814	96	578.374	2.38376
APQLNHSNSDVVSINCNIR	CTRL5	D:\AmpK_Pass2\AmpKPass3\CTRL5	CTRL5_300ID_ZORBAX_ZED_TT_29May2014	2077.64	20662.2	3	68814	15	331.099	2.28
APQLNHSNSDVVSINCNIR	CTRL5	D:\AmpK_Pass2\AmpKPass3\CTRL5	CTRL5_300ID_ZORBAX_ZED_TT_29May2014	2077.64	20662.2	3	68814	65	506.403	2.27985
APQLNHSNSDVVSINCNIR	CTRL5	D:\AmpK_Pass2\AmpKPass3\CTRL5	CTRL5_300ID_ZORBAX_ZED_TT_29May2014	2077.64	20662.2	3	68814	201	1009.8	2.27799
APQLNHSNSDVVSINCNIR	CTRL5	D:\AmpK_Pass2\AmpKPass3\CTRL5	CTRL5_300ID_ZORBAX_ZED_TT_29May2014	2077.64	20662.2	3	68814	172	727.716	2.27461
APQLNHSNSDVVSINCNIR	CTRL5	D:\AmpK_Pass2\AmpKPass3\CTRL5	CTRL5_300ID_ZORBAX_ZED_TT_29May2014	2077.64	20662.2	3	68814	179	791.38	2.27255
APQLNHSNSDVVSINCNIR	CTRL5	D:\AmpK_Pass2\AmpKPass3\CTRL5	CTRL5_300ID_ZORBAX_ZED_TT_29May2014	2077.64	20662.2	3	68814	134	639.283	2.27112
APQLNHSNSDVVSINCNIR	CTRL5	D:\AmpK_Pass2\AmpKPass3\CTRL5	CTRL5_300ID_ZORBAX_ZED_TT_29May2014	2077.64	20662.2	3	68814	32	403.511	2.17262
APQLNHSNSDVVSINCNIR	CTRL5	D:\AmpK_Pass2\AmpKPass3\CTRL5	CTRL5_300ID_ZORBAX_ZED_TT_29May2014	2077.64	20662.2	3	68814	205	1099	2.08677
APQLNHSNSDVVSINCNIR	CTRL5	D:\AmpK_Pass2\AmpKPass3\CTRL5	CTRL5_300ID_ZORBAX_ZED_TT_29May2014	2077.64	20662.2	3	68814	135	641.359	2.07909
APQLNHSNSDVVSINCNIR	CTRL5	D:\AmpK_Pass2\AmpKPass3\CTRL5	CTRL5_300ID_ZORBAX_ZED_TT_29May2014	2077.64	20662.2	3	68814	97	579.484	2.06269
APQLNHSNSDVVSINCNIR	CTRL5	D:\AmpK_Pass2\AmpKPass3\CTRL5	CTRL5_300ID_ZORBAX_ZED_TT_29May2014	2077.64	20662.2	3	68814	187	863.891	2.06159
APQLNHSNSDVVSINCNIR	CTRL5	D:\AmpK_Pass2\AmpKPass3\CTRL5	CTRL5_300ID_ZORBAX_ZED_TT_29May2014	2077.64	20662.2	3	68814	46	444.972	2.06088
APQLNHSNSDVVSINCNIR	CTRL5	D:\AmpK_Pass2\AmpKPass3\CTRL5	CTRL5_300ID_ZORBAX_ZED_TT_29May2014	2077.64	20662.2	3	68814	144	658.198	2.05973
APQLNHSNSDVVSINCNIR	CTRL5	D:\AmpK_Pass2\AmpKPass3\CTRL5	CTRL5_300ID_ZORBAX_ZED_TT_29May2014	2077.64	20662.2	3	68814	185	835.631	2.05674
APQLNHSNSDVVSINCNIR	CTRL5	D:\AmpK_Pass2\AmpKPass3\CTRL5	CTRL5_300ID_ZORBAX_ZED_TT_29May2014	2077.64	20662.2	3	68814	193	917.323	1.99028
APQLNHSNSDVVSINCNIR	CTRL5	D:\AmpK_Pass2\AmpKPass3\CTRL5	CTRL5_300ID_ZORBAX_ZED_TT_29May2014	2077.64	20662.2	3	68814	92	569.098	1.96941
APQLNHSNSDVVSINCNIR	CTRL5	D:\AmpK_Pass2\AmpKPass3\CTRL5	CTRL5_300ID_ZORBAX_ZED_TT_29May2014	2077.64	20662.2	3	68814	58	482.249	1.96366
APQLNHSNSDVVSINCNIR	CTRL5	D:\AmpK_Pass2\AmpKPass3\CTRL5	CTRL5_300ID_ZORBAX_ZED_TT_29May2014	2077.64	20662.2	3	68814	86	548.964	1.95557
APQLNHSNSDVVSINCNIR	CTRL5	D:\AmpK_Pass2\AmpKPass3\CTRL5	CTRL5_300ID_ZORBAX_ZED_TT_29May2014	2077.64	20662.2	3	68814	186	849.598	1.95538
APQLNHSNSDVVSINCNIR	CTRL5	D:\AmpK_Pass2\AmpKPass3\CTRL5	CTRL5_300ID_ZORBAX_ZED_TT_29May2014	2077.64	20662.2	3	68814	59	487.481	1.95375
APQLNHSNSDVVSINCNIR	CTRL5	D:\AmpK_Pass2\AmpKPass3\CTRL5	CTRL5_300ID_ZORBAX_ZED_TT_29May2014	2077.64	20662.2	3	68814	3	246.075	1.9533
APQLNHSNSDVVSINCNIR	CTRL5	D:\AmpK_Pass2\AmpKPass3\CTRL5	CTRL5_300ID_ZORBAX_ZED_TT_29May2014	2077.64	20662.2	3	68814	8	265.111	1.95289
APQLNHSNSDVVSINCNIR	CTRL5	D:\AmpK_Pass2\AmpKPass3\CTRL5	CTRL5_300ID_ZORBAX_ZED_TT_29May2014	2077.64	20662.2	3	68814	18	338.128	1.95
APQLNHSNSDVVSINCNIR	CTRL5	D:\AmpK_Pass2\AmpKPass3\CTRL5	CTRL5_300ID_ZORBAX_ZED_TT_29May2014	2077.64	20662.2	3	68814	196	924.946	1.84718
APQLNHSNSDVVSINCNIR	CTRL5	D:\AmpK_Pass2\AmpKPass3\CTRL5	CTRL5_300ID_ZORBAX_ZED_TT_29May2014	2077.64	20662.2	3	68814	77	533.36	1.84319
APQLNHSNSDVVSINCNIR	CTRL5	D:\AmpK_Pass2\AmpKPass3\CTRL5	CTRL5_300ID_ZORBAX_ZED_TT_29May2014	2077.64	20662.2	3	68814	79	535.639	1.84315
APQLNHSNSDVVSINCNIR	CTRL5	D:\AmpK_Pass2\AmpKPass3\CTRL5	CTRL5_300ID_ZORBAX_ZED_TT_29May2014	2077.64	20662.2	3	68814	13	305.128	1.84089
APQLNHSNSDVVSINCNIR	CTRL5	D:\AmpK_Pass2\AmpKPass3\CTRL5	CTRL5_300ID_ZORBAX_ZED_TT_29May2014	2077.64	20662.2	3	68814	57	481.541	1.84054
APQLNHSNSDVVSINCNIR	CTRL5	D:\AmpK_Pass2\AmpKPass3\CTRL5	CTRL5_300ID_ZORBAX_ZED_TT_29May2014	2077.64	20662.2	3	68814	120	620.869	1.83991
APQLNHSNSDVVSINCNIR	CTRL5	D:\AmpK_Pass2\AmpKPass3\CTRL5	CTRL5_300ID_ZORBAX_ZED_TT_29May2014	2077.64	20662.2	3	68814	21	351.086	1.76135
APQLNHSNSDVVSINCNIR	CTRL5	D:\AmpK_Pass2\AmpKPass3\CTRL5	CTRL5_300ID_ZORBAX_ZED_TT_29May2014	2077.64	20662.2	3	68814	198	982.627	1.74539
APQLNHSNSDVVSINCNIR	CTRL5	D:\AmpK_Pass2\AmpKPass3\CTRL5	CTRL5_300ID_ZORBAX_ZED_TT_29May2014	2077.64	20662.2	3	68814	73	522.766	1.73919
APQLNHSNSDVVSINCNIR	CTRL5	D:\AmpK_Pass2\AmpKPass3\CTRL5	CTRL5_300ID_ZORBAX_ZED_TT_29May2014	2077.64	20662.2	3	68814	189	877.595	1.73848
APQLNHSNSDVVSINCNIR	CTRL5	D:\AmpK_Pass2\AmpKPass3\CTRL5	CTRL5_300ID_ZORBAX_ZED_TT_29May2014	2077.64	20662.2	3	68814	76	531.248	1.73776
APQLNHSNSDVVSINCNIR	CTRL5	D:\AmpK_Pass2\AmpKPass3\CTRL5	CTRL5_300ID_ZORBAX_ZED_TT_29May2014	2077.64	20662.2	3	68814	199	1002.02	1.73712
APQLNHSNSDVVSINCNIR	CTRL5	D:\AmpK_Pass2\AmpKPass3\CTRL5	CTRL5_300ID_ZORBAX_ZED_TT_29May2014	2077.64	20662.2	3	68814	72	521.94	1.73693
APQLNHSNSDVVSINCNIR	CTRL5	D:\AmpK_Pass2\AmpKPass3\CTRL5	CTRL5_300ID_ZORBAX_ZED_TT_29May2014	2077.64	20662.2	3	68814	74	523.472	1.73609
APQLNHSNSDVVSINCNIR	CTRL5	D:\AmpK_Pass2\AmpKPass3\CTRL5	CTRL5_300ID_ZORBAX_ZED_TT_29May2014	2077.64	20662.2	3	68814	203	1024.37	1.73602
APQLNHSNSDVVSINCNIR	CTRL5	D:\AmpK_Pass2\AmpKPass3\CTRL5	CTRL5_300ID_ZORBAX_ZED_TT_29May2014	2077.64	20662.2	3	68814	78	534.389	1.73583
APQLNHSNSDVVSINCNIR	CTRL5	D:\AmpK_Pass2\AmpKPass3\CTRL5	CTRL5_300ID_ZORBAX_ZED_TT_29May2014	2077.64	20662.2	3	68814	209	1149.79	1.73395
APQLNHSNSDVVSINCNIR	CTRL5	D:\AmpK_Pass2\AmpKPass3\CTRL5	CTRL5_300ID_ZORBAX_ZED_TT_29May2014	2077.64	20662.2	3	68814	10	295.246	1.656
APQLNHSNSDVVSINCNIR	CTRL5	D:\AmpK_Pass2\AmpKPass3\CTRL5	CTRL5_300ID_ZORBAX_ZED_TT_29May2014	2077.64	20662.2	3	68814	176	748.202	1.63118
APQLNHSNSDVVSINCNIR	CTRL5	D:\AmpK_Pass2\AmpKPass3\CTRL5	CTRL5_300ID_ZORBAX_ZED_TT_29May2014	2077.64	20662.2	3	68814	141	651.153	1.62868
APQLNHSNSDVVSINCNIR	CTRL5	D:\AmpK_Pass2\AmpKPass3\CTRL5	CTRL5_300ID_ZORBAX_ZED_TT_29May2014	2077.64	20662.2	3	68814	42	434.402	1.6283
APQLNHSNSDVVSINCNIR	CTRL5	D:\AmpK_Pass2\AmpKPass3\CTRL5	CTRL5_300ID_ZORBAX_ZED_TT_29May2014	2077.64	20662.2	3	68814	208	1141.05	1.62702
APQLNHSNSDVVSINCNIR	CTRL5	D:\AmpK_Pass2\AmpKPass3\CTRL5	CTRL5_300ID_ZORBAX_ZED_TT_29May2014	2077.64	20662.2	3	68814	1	224.136	1.62678
APQLNHSNSDVVSINCNIR	CTRL5	D:\AmpK_Pass2\AmpKPass3\CTRL5	CTRL5_300ID_ZORBAX_ZED_TT_29May2014	2077.64	20662.2	3	68814	27	384.88	1.62472
APQLNHSNSDVVSINCNIR	CTRL5	D:\AmpK_Pass2\AmpKPass3\CTRL5	CTRL5_300ID_ZORBAX_ZED_TT_29May2014	2077.64	20662.2	3	68814	150	665.357	1.61447
APQLNHSNSDVVSINCNIR	CTRL5	D:\AmpK_Pass2\AmpKPass3\CTRL5	CTRL5_300ID_ZORBAX_ZED_TT_29May2014	2077.64	20662.2	3	68814	190	882.621	1.55886
APQLNHSNSDVVSINCNIR	CTRL5	D:\AmpK_Pass2\AmpKPass3\CTRL5	CTRL5_300ID_ZORBAX_ZED_TT_29May2014	2077.64	20662.2	3	68814	188	872.817	1.53867
APQLNHSNSDVVSINCNIR	CTRL5	D:\AmpK_Pass2\AmpKPass3\CTRL5	CTRL5_300ID_ZORBAX_ZED_TT_29May2014	2077.64	20662.2	3	68814	45	443.414	1.52992
APQLNHSNSDVVSINCNIR	CTRL5	D:\AmpK_Pass2\AmpKPass3\CTRL5	CTRL5_300ID_ZORBAX_ZED_TT_29May2014	2077.64	20662.2	3	68814	153	669.099	1.52474
APQLNHSNSDVVSINCNIR	CTRL5	D:\AmpK_Pass2\AmpKPass3\CTRL5	CTRL5_300ID_ZORBAX_ZED_TT_29May2014	2077.64	20662.2	3	68814	204	1027.42	1.52081
APQLNHSNSDVVSINCNIR	CTRL5	D:\AmpK_Pass2\AmpKPass3\CTRL5	CTRL5_300ID_ZORBAX_ZED_TT_29May2014	2077.64	20662.2	3	68814	50	455.097	1.52067
APQLNHSNSDVVSINCNIR	CTRL5	D:\AmpK_Pass2\AmpKPass3\CTRL5	CTRL5_300ID_ZORBAX_ZED_TT_29May2014	2077.64	20662.2	3	68814	126	631.365	1.52029
APQLNHSNSDVVSINCNIR	CTRL5	D:\AmpK_Pass2\AmpKPass3\CTRL5	CTRL5_300ID_ZORBAX_ZED_TT_29May2014	2077.64	20662.2	3	68814	19	340.136	1.51846
APQLNHSNSDVVSINCNIR	CTRL5	D:\AmpK_Pass2\AmpKPass3\CTRL5	CTRL5_300ID_ZORBAX_ZED_TT_29May2014	2077.64	20662.2	3	68814	56	475.124	1.51676
APQLNHSNSDVVSINCNIR	CTRL5	D:\AmpK_Pass2\AmpKPass3\CTRL5	CTRL5_300ID_ZORBAX_ZED_TT_29May2014	2077.64	20662.2	3	68814	63	504.301	1.51522
APQLNHSNSDVVSINCNIR	CTRL5	D:\AmpK_Pass2\AmpKPass3\CTRL5	CTRL5_300ID_ZORBAX_ZED_TT_29May2014	2077.64	20662.2	3	68814	112	607.171	1.41758
APQLNHSNSDVVSINCNIR	CTRL5	D:\AmpK_Pass2\AmpKPass3\CTRL5	CTRL5_300ID_ZORBAX_ZED_TT_29May2014	2077.64	20662.2	3	68814	100	587.344	1.4146
APQLNHSNSDVVSINCNIR	CTRL5	D:\AmpK_Pass2\AmpKPass3\CTRL5	CTRL5_300ID_ZORBAX_ZED_TT_29May2014	2077.64	20662.2	3	68814	191	896.69	1.41189
APQLNHSNSDVVSINCNIR	CTRL5	D:\AmpK_Pass2\AmpKPass3\CTRL5	CTRL5_300ID_ZORBAX_ZED_TT_29May2014	2077.64	20662.2	3	68814	197	966.842	1.41184
APQLNHSNSDVVSINCNIR	CTRL5	D:\AmpK_Pass2\AmpKPass3\CTRL5	CTRL5_300ID_ZORBAX_ZED_TT_29May2014	2077.64	20662.2	3	68814	26	377.323	1.4113
APQLNHSNSDVVSINCNIR	CTRL5	D:\AmpK_Pass2\AmpKPass3\CTRL5	CTRL5_300ID_ZORBAX_ZED_TT_29May2014	2077.64	20662.2	3	68814	67	508.974	1.41038
APQLNHSNSDVVSINCNIR	CTRL5	D:\AmpK_Pass2\AmpKPass3\CTRL5	CTRL5_300ID_ZORBAX_ZED_TT_29May2014	2077.64	20662.2	3	68814	9	287.358	1.30332
APQLNHSNSDVVSINCNIR	CTRL5	D:\AmpK_Pass2\AmpKPass3\CTRL5	CTRL5_300ID_ZORBAX_ZED_TT_29May2014	2077.64	20662.2	3	68814	43	437.334	1.30306
APQLNHSNSDVVSINCNIR	CTRL5	D:\AmpK_Pass2\AmpKPass3\CTRL5	CTRL5_300ID_ZORBAX_ZED_TT_29May2014	2077.64	20662.2	3	68814	87	550.159	1.30288
APQLNHSNSDVVSINCNIR	CTRL5	D:\AmpK_Pass2\AmpKPass3\CTRL5	CTRL5_300ID_ZORBAX_ZED_TT_29May2014	2077.64	20662.2	3	68814	11	300.07	1.3025
APQLNHSNSDVVSINCNIR	CTRL5	D:\AmpK_Pass2\AmpKPass3\CTRL5	CTRL5_300ID_ZORBAX_ZED_TT_29May2014	2077.64	20662.2	3	68814	20	349.367	1.30144
APQLNHSNSDVVSINCNIR	CTRL5	D:\AmpK_Pass2\AmpKPass3\CTRL5	CTRL5_300ID_ZORBAX_ZED_TT_29May2014	2077.64	20662.2	3	68814	51	457.091	1.21325
APQLNHSNSDVVSINCNIR	CTRL5	D:\AmpK_Pass2\AmpKPass3\CTRL5	CTRL5_300ID_ZORBAX_ZED_TT_29May2014	2077.64	20662.2	3	68814	90	559.261	1.20143
APQLNHSNSDVVSINCNIR	CTRL5	D:\AmpK_Pass2\AmpKPass3\CTRL5	CTRL5_300ID_ZORBAX_ZED_TT_29May2014	2077.64	20662.2	3	68814	106	594.263	1.20056
APQLNHSNSDVVSINCNIR	CTRL5	D:\AmpK_Pass2\AmpKPass3\CTRL5	CTRL5_300ID_ZORBAX_ZED_TT_29May2014	2077.64	20662.2	3	68814	82	543.462	1.19675
APQLNHSNSDVVSINCNIR	CTRL5	D:\AmpK_Pass2\AmpKPass3\CTRL5	CTRL5_300ID_ZORBAX_ZED_TT_29May2014	2077.64	20662.2	3	68814	114	612.356	1.1947
APQLNHSNSDVVSINCNIR	CTRL5	D:\AmpK_Pass2\AmpKPass3\CTRL5	CTRL5_300ID_ZORBAX_ZED_TT_29May2014	2077.64	20662.2	3	68814	25	369.347	1.19383
APQLNHSNSDVVSINCNIR	CTRL5	D:\AmpK_Pass2\AmpKPass3\CTRL5	CTRL5_300ID_ZORBAX_ZED_TT_29May2014	2077.64	20662.2	3	68814	81	542.31	1.19356
APQLNHSNSDVVSINCNIR	CTRL5	D:\AmpK_Pass2\AmpKPass3\CTRL5	CTRL5_300ID_ZORBAX_ZED_TT_29May2014	2077.64	20662.2	3	68814	111	603.526	1.19338
APQLNHSNSDVVSINCNIR	CTRL5	D:\AmpK_Pass2\AmpKPass3\CTRL5	CTRL5_300ID_ZORBAX_ZED_TT_29May2014	2077.64	20662.2	3	68814	52	457.942	1.19271
APQLNHSNSDVVSINCNIR	CTRL5	D:\AmpK_Pass2\AmpKPass3\CTRL5	CTRL5_300ID_ZORBAX_ZED_TT_29May2014	2077.64	20662.2	3	68814	36	413.166	1.10656
APQLNHSNSDVVSINCNIR	CTRL5	D:\AmpK_Pass2\AmpKPass3\CTRL5	CTRL5_300ID_ZORBAX_ZED_TT_29May2014	2077.64	20662.2	3	68814	39	417.917	1.10634
APQLNHSNSDVVSINCNIR	CTRL5	D:\AmpK_Pass2\AmpKPass3\CTRL5	CTRL5_300ID_ZORBAX_ZED_TT_29May2014	2077.64	20662.2	3	68814	49	453.583	1.09519
APQLNHSNSDVVSINCNIR	CTRL5	D:\AmpK_Pass2\AmpKPass3\CTRL5	CTRL5_300ID_ZORBAX_ZED_TT_29May2014	2077.64	20662.2	3	68814	171	723.923	1.08639
APQLNHSNSDVVSINCNIR	CTRL5	D:\AmpK_Pass2\AmpKPass3\CTRL5	CTRL5_300ID_ZORBAX_ZED_TT_29May2014	2077.64	20662.2	3	68814	60	491.898	1.08531
APQLNHSNSDVVSINCNIR	CTRL5	D:\AmpK_Pass2\AmpKPass3\CTRL5	CTRL5_300ID_ZORBAX_ZED_TT_29May2014	2077.64	20662.2	3	68814	35	410.857	1.08525
APQLNHSNSDVVSINCNIR	CTRL5	D:\AmpK_Pass2\AmpKPass3\CTRL5	CTRL5_300ID_ZORBAX_ZED_TT_29May2014	2077.64	20662.2	3	68814	212	1281.85	0.990769
APQLNHSNSDVVSINCNIR	CTRL5	D:\AmpK_Pass2\AmpKPass3\CTRL5	CTRL5_300ID_ZORBAX_ZED_TT_29May2014	2077.64	20662.2	3	68814	206	1104.74	0.988878
APQLNHSNSDVVSINCNIR	CTRL5	D:\AmpK_Pass2\AmpKPass3\CTRL5	CTRL5_300ID_ZORBAX_ZED_TT_29May2014	2077.64	20662.2	3	68814	40	419.407	0.987172
APQLNHSNSDVVSINCNIR	CTRL5	D:\AmpK_Pass2\AmpKPass3\CTRL5	CTRL5_300ID_ZORBAX_ZED_TT_29May2014	2077.64	20662.2	3	68814	174	742.453	0.977267
APQLNHSNSDVVSINCNIR	CTRL5	D:\AmpK_Pass2\AmpKPass3\CTRL5	CTRL5_300ID_ZORBAX_ZED_TT_29May2014	2077.64	20662.2	3	68814	4	251.099	0.976974
APQLNHSNSDVVSINCNIR	CTRL5	D:\AmpK_Pass2\AmpKPass3\CTRL5	CTRL5_300ID_ZORBAX_ZED_TT_29May2014	2077.64	20662.2	3	68814	211	1208.65	0.976703
APQLNHSNSDVVSINCNIR	CTRL5	D:\AmpK_Pass2\AmpKPass3\CTRL5	CTRL5_300ID_ZORBAX_ZED_TT_29May2014	2077.64	20662.2	3	68814	28	386.731	0.976457
APQLNHSNSDVVSINCNIR	CTRL5	D:\AmpK_Pass2\AmpKPass3\CTRL5	CTRL5_300ID_ZORBAX_ZED_TT_29May2014	2077.64	20662.2	3	68814	68	513.616	0.97634
APQLNHSNSDVVSINCNIR	CTRL5	D:\AmpK_Pass2\AmpKPass3\CTRL5	CTRL5_300ID_ZORBAX_ZED_TT_29May2014	2077.64	20662.2	3	68814	7	264.034	0.97598
APQLNHSNSDVVSINCNIR	CTRL5	D:\AmpK_Pass2\AmpKPass3\CTRL5	CTRL5_300ID_ZORBAX_ZED_TT_29May2014	2077.64	20662.2	3	68814	53	461.216	0.975492
APQLNHSNSDVVSINCNIR	CTRL5	D:\AmpK_Pass2\AmpKPass3\CTRL5	CTRL5_300ID_ZORBAX_ZED_TT_29May2014	2077.64	20662.2	3	68814	16	335.288	0.975449
APQLNHSNSDVVSINCNIR	CTRL5	D:\AmpK_Pass2\AmpKPass3\CTRL5	CTRL5_300ID_ZORBAX_ZED_TT_29May2014	2077.64	20662.2	3	68814	62	503.505	0.972837
APQLNHSNSDVVSINCNIR	CTRL5	D:\AmpK_Pass2\AmpKPass3\CTRL5	CTRL5_300ID_ZORBAX_ZED_TT_29May2014	2077.64	20662.2	3	68814	17	336.385	0.972158
APQLNHSNSDVVSINCNIR	CTRL5	D:\AmpK_Pass2\AmpKPass3\CTRL5	CTRL5_300ID_ZORBAX_ZED_TT_29May2014	2077.64	20662.2	3	68814	80	541.545	0.87221
APQLNHSNSDVVSINCNIR	CTRL5	D:\AmpK_Pass2\AmpKPass3\CTRL5	CTRL5_300ID_ZORBAX_ZED_TT_29May2014	2077.64	20662.2	3	68814	175	745.006	0.653562
FGSSIASVR	CTRL5	D:\AmpK_Pass2\AmpKPass3\CTRL5	CTRL5_300ID_ZORBAX_ZED_TT_29May2014	923.92	7566.89	3	67318	86	273.032	1163.4
FGSSIASVR	CTRL5	D:\AmpK_Pass2\AmpKPass3\CTRL5	CTRL5_300ID_ZORBAX_ZED_TT_29May2014	923.92	7566.89	3	67318	98	290.992	604.411
FGSSIASVR	CTRL5	D:\AmpK_Pass2\AmpKPass3\CTRL5	CTRL5_300ID_ZORBAX_ZED_TT_29May2014	923.92	7566.89	3	67318	69	249.084	229.233
FGSSIASVR	CTRL5	D:\AmpK_Pass2\AmpKPass3\CTRL5	CTRL5_300ID_ZORBAX_ZED_TT_29May2014	923.92	7566.89	3	67318	85	270.733	208.182
FGSSIASVR	CTRL5	D:\AmpK_Pass2\AmpKPass3\CTRL5	CTRL5_300ID_ZORBAX_ZED_TT_29May2014	923.92	7566.89	3	67318	7	120.104	195.326
FGSSIASVR	CTRL5	D:\AmpK_Pass2\AmpKPass3\CTRL5	CTRL5_300ID_ZORBAX_ZED_TT_29May2014	923.92	7566.89	3	67318	83	267.938	152.984
FGSSIASVR	CTRL5	D:\AmpK_Pass2\AmpKPass3\CTRL5	CTRL5_300ID_ZORBAX_ZED_TT_29May2014	923.92	7566.89	3	67318	95	286.824	79.6669
FGSSIASVR	CTRL5	D:\AmpK_Pass2\AmpKPass3\CTRL5	CTRL5_300ID_ZORBAX_ZED_TT_29May2014	923.92	7566.89	3	67318	112	338.719	79.2015
FGSSIASVR	CTRL5	D:\AmpK_Pass2\AmpKPass3\CTRL5	CTRL5_300ID_ZORBAX_ZED_TT_29May2014	923.92	7566.89	3	67318	117	350.396	77.646
FGSSIASVR	CTRL5	D:\AmpK_Pass2\AmpKPass3\CTRL5	CTRL5_300ID_ZORBAX_ZED_TT_29May2014	923.92	7566.89	3	67318	97	290.192	72.741
FGSSIASVR	CTRL5	D:\AmpK_Pass2\AmpKPass3\CTRL5	CTRL5_300ID_ZORBAX_ZED_TT_29May2014	923.92	7566.89	3	67318	68	248.249	68.9969
FGSSIASVR	CTRL5	D:\AmpK_Pass2\AmpKPass3\CTRL5	CTRL5_300ID_ZORBAX_ZED_TT_29May2014	923.92	7566.89	3	67318	110	328.222	65.5339
FGSSIASVR	CTRL5	D:\AmpK_Pass2\AmpKPass3\CTRL5	CTRL5_300ID_ZORBAX_ZED_TT_29May2014	923.92	7566.89	3	67318	61	237.205	59.9302
FGSSIASVR	CTRL5	D:\AmpK_Pass2\AmpKPass3\CTRL5	CTRL5_300ID_ZORBAX_ZED_TT_29May2014	923.92	7566.89	3	67318	87	273.829	59.2551
FGSSIASVR	CTRL5	D:\AmpK_Pass2\AmpKPass3\CTRL5	CTRL5_300ID_ZORBAX_ZED_TT_29May2014	923.92	7566.89	3	67318	71	250.88	56.9536
FGSSIASVR	CTRL5	D:\AmpK_Pass2\AmpKPass3\CTRL5	CTRL5_300ID_ZORBAX_ZED_TT_29May2014	923.92	7566.89	3	67318	28	175.048	56.3627
FGSSIASVR	CTRL5	D:\AmpK_Pass2\AmpKPass3\CTRL5	CTRL5_300ID_ZORBAX_ZED_TT_29May2014	923.92	7566.89	3	67318	104	308.827	50.8875
FGSSIASVR	CTRL5	D:\AmpK_Pass2\AmpKPass3\CTRL5	CTRL5_300ID_ZORBAX_ZED_TT_29May2014	923.92	7566.89	3	67318	101	299.216	45.9329
FGSSIASVR	CTRL5	D:\AmpK_Pass2\AmpKPass3\CTRL5	CTRL5_300ID_ZORBAX_ZED_TT_29May2014	923.92	7566.89	3	67318	82	267.259	36.7672
FGSSIASVR	CTRL5	D:\AmpK_Pass2\AmpKPass3\CTRL5	CTRL5_300ID_ZORBAX_ZED_TT_29May2014	923.92	7566.89	3	67318	70	250.087	33.7942
FGSSIASVR	CTRL5	D:\AmpK_Pass2\AmpKPass3\CTRL5	CTRL5_300ID_ZORBAX_ZED_TT_29May2014	923.92	7566.89	3	67318	73	253.923	33.4261
FGSSIASVR	CTRL5	D:\AmpK_Pass2\AmpKPass3\CTRL5	CTRL5_300ID_ZORBAX_ZED_TT_29May2014	923.92	7566.89	3	67318	78	262.634	32.3377
FGSSIASVR	CTRL5	D:\AmpK_Pass2\AmpKPass3\CTRL5	CTRL5_300ID_ZORBAX_ZED_TT_29May2014	923.92	7566.89	3	67318	80	265.217	32.2954
FGSSIASVR	CTRL5	D:\AmpK_Pass2\AmpKPass3\CTRL5	CTRL5_300ID_ZORBAX_ZED_TT_29May2014	923.92	7566.89	3	67318	63	243.17	31.7733
FGSSIASVR	CTRL5	D:\AmpK_Pass2\AmpKPass3\CTRL5	CTRL5_300ID_ZORBAX_ZED_TT_29May2014	923.92	7566.89	3	67318	2	102.979	31.7362
FGSSIASVR	CTRL5	D:\AmpK_Pass2\AmpKPass3\CTRL5	CTRL5_300ID_ZORBAX_ZED_TT_29May2014	923.92	7566.89	3	67318	76	260.47	31.4996
FGSSIASVR	CTRL5	D:\AmpK_Pass2\AmpKPass3\CTRL5	CTRL5_300ID_ZORBAX_ZED_TT_29May2014	923.92	7566.89	3	67318	127	416.215	30.3812
FGSSIASVR	CTRL5	D:\AmpK_Pass2\AmpKPass3\CTRL5	CTRL5_300ID_ZORBAX_ZED_TT_29May2014	923.92	7566.89	3	67318	5	117.064	29.6161
FGSSIASVR	CTRL5	D:\AmpK_Pass2\AmpKPass3\CTRL5	CTRL5_300ID_ZORBAX_ZED_TT_29May2014	923.92	7566.89	3	67318	79	263.266	29.4578
FGSSIASVR	CTRL5	D:\AmpK_Pass2\AmpKPass3\CTRL5	CTRL5_300ID_ZORBAX_ZED_TT_29May2014	923.92	7566.89	3	67318	77	261.571	29.3667
FGSSIASVR	CTRL5	D:\AmpK_Pass2\AmpKPass3\CTRL5	CTRL5_300ID_ZORBAX_ZED_TT_29May2014	923.92	7566.89	3	67318	55	223.524	27.8199
FGSSIASVR	CTRL5	D:\AmpK_Pass2\AmpKPass3\CTRL5	CTRL5_300ID_ZORBAX_ZED_TT_29May2014	923.92	7566.89	3	67318	43	196.164	26.8182
FGSSIASVR	CTRL5	D:\AmpK_Pass2\AmpKPass3\CTRL5	CTRL5_300ID_ZORBAX_ZED_TT_29May2014	923.92	7566.89	3	67318	102	299.895	25.8303
FGSSIASVR	CTRL5	D:\AmpK_Pass2\AmpKPass3\CTRL5	CTRL5_300ID_ZORBAX_ZED_TT_29May2014	923.92	7566.89	3	67318	120	369.179	24.7337
FGSSIASVR	CTRL5	D:\AmpK_Pass2\AmpKPass3\CTRL5	CTRL5_300ID_ZORBAX_ZED_TT_29May2014	923.92	7566.89	3	67318	113	341.997	23.5588
FGSSIASVR	CTRL5	D:\AmpK_Pass2\AmpKPass3\CTRL5	CTRL5_300ID_ZORBAX_ZED_TT_29May2014	923.92	7566.89	3	67318	40	193.22	23.4744
FGSSIASVR	CTRL5	D:\AmpK_Pass2\AmpKPass3\CTRL5	CTRL5_300ID_ZORBAX_ZED_TT_29May2014	923.92	7566.89	3	67318	99	292.077	23.2832
FGSSIASVR	CTRL5	D:\AmpK_Pass2\AmpKPass3\CTRL5	CTRL5_300ID_ZORBAX_ZED_TT_29May2014	923.92	7566.89	3	67318	108	319.71	22.7744
FGSSIASVR	CTRL5	D:\AmpK_Pass2\AmpKPass3\CTRL5	CTRL5_300ID_ZORBAX_ZED_TT_29May2014	923.92	7566.89	3	67318	31	183.197	22.2086
FGSSIASVR	CTRL5	D:\AmpK_Pass2\AmpKPass3\CTRL5	CTRL5_300ID_ZORBAX_ZED_TT_29May2014	923.92	7566.89	3	67318	92	283.791	20.1922
FGSSIASVR	CTRL5	D:\AmpK_Pass2\AmpKPass3\CTRL5	CTRL5_300ID_ZORBAX_ZED_TT_29May2014	923.92	7566.89	3	67318	125	393.256	19.2992
FGSSIASVR	CTRL5	D:\AmpK_Pass2\AmpKPass3\CTRL5	CTRL5_300ID_ZORBAX_ZED_TT_29May2014	923.92	7566.89	3	67318	114	342.748	17.8364
FGSSIASVR	CTRL5	D:\AmpK_Pass2\AmpKPass3\CTRL5	CTRL5_300ID_ZORBAX_ZED_TT_29May2014	923.92	7566.89	3	67318	94	286.045	17.7276
FGSSIASVR	CTRL5	D:\AmpK_Pass2\AmpKPass3\CTRL5	CTRL5_300ID_ZORBAX_ZED_TT_29May2014	923.92	7566.89	3	67318	67	247.473	17.0515
FGSSIASVR	CTRL5	D:\AmpK_Pass2\AmpKPass3\CTRL5	CTRL5_300ID_ZORBAX_ZED_TT_29May2014	923.92	7566.89	3	67318	96	288.053	16.5431
FGSSIASVR	CTRL5	D:\AmpK_Pass2\AmpKPass3\CTRL5	CTRL5_300ID_ZORBAX_ZED_TT_29May2014	923.92	7566.89	3	67318	100	297.951	16.1857
FGSSIASVR	CTRL5	D:\AmpK_Pass2\AmpKPass3\CTRL5	CTRL5_300ID_ZORBAX_ZED_TT_29May2014	923.92	7566.89	3	67318	136	492.178	15.024
FGSSIASVR	CTRL5	D:\AmpK_Pass2\AmpKPass3\CTRL5	CTRL5_300ID_ZORBAX_ZED_TT_29May2014	923.92	7566.89	3	67318	107	317.658	14.7303
FGSSIASVR	CTRL5	D:\AmpK_Pass2\AmpKPass3\CTRL5	CTRL5_300ID_ZORBAX_ZED_TT_29May2014	923.92	7566.89	3	67318	8	123.058	14.7072
FGSSIASVR	CTRL5	D:\AmpK_Pass2\AmpKPass3\CTRL5	CTRL5_300ID_ZORBAX_ZED_TT_29May2014	923.92	7566.89	3	67318	49	207.193	14.5782
FGSSIASVR	CTRL5	D:\AmpK_Pass2\AmpKPass3\CTRL5	CTRL5_300ID_ZORBAX_ZED_TT_29May2014	923.92	7566.89	3	67318	59	233.148	14.1502
FGSSIASVR	CTRL5	D:\AmpK_Pass2\AmpKPass3\CTRL5	CTRL5_300ID_ZORBAX_ZED_TT_29May2014	923.92	7566.89	3	67318	115	343.994	13.5717
FGSSIASVR	CTRL5	D:\AmpK_Pass2\AmpKPass3\CTRL5	CTRL5_300ID_ZORBAX_ZED_TT_29May2014	923.92	7566.89	3	67318	27	174.031	13.538
FGSSIASVR	CTRL5	D:\AmpK_Pass2\AmpKPass3\CTRL5	CTRL5_300ID_ZORBAX_ZED_TT_29May2014	923.92	7566.89	3	67318	38	191	13.3202
FGSSIASVR	CTRL5	D:\AmpK_Pass2\AmpKPass3\CTRL5	CTRL5_300ID_ZORBAX_ZED_TT_29May2014	923.92	7566.89	3	67318	62	238.087	12.6033
FGSSIASVR	CTRL5	D:\AmpK_Pass2\AmpKPass3\CTRL5	CTRL5_300ID_ZORBAX_ZED_TT_29May2014	923.92	7566.89	3	67318	130	430.701	12.3627
FGSSIASVR	CTRL5	D:\AmpK_Pass2\AmpKPass3\CTRL5	CTRL5_300ID_ZORBAX_ZED_TT_29May2014	923.92	7566.89	3	67318	74	254.969	12.0119
FGSSIASVR	CTRL5	D:\AmpK_Pass2\AmpKPass3\CTRL5	CTRL5_300ID_ZORBAX_ZED_TT_29May2014	923.92	7566.89	3	67318	118	352.548	10.9139
FGSSIASVR	CTRL5	D:\AmpK_Pass2\AmpKPass3\CTRL5	CTRL5_300ID_ZORBAX_ZED_TT_29May2014	923.92	7566.89	3	67318	37	190.203	10.5377
FGSSIASVR	CTRL5	D:\AmpK_Pass2\AmpKPass3\CTRL5	CTRL5_300ID_ZORBAX_ZED_TT_29May2014	923.92	7566.89	3	67318	64	244.531	10.3545
FGSSIASVR	CTRL5	D:\AmpK_Pass2\AmpKPass3\CTRL5	CTRL5_300ID_ZORBAX_ZED_TT_29May2014	923.92	7566.89	3	67318	124	385.396	10.2914
FGSSIASVR	CTRL5	D:\AmpK_Pass2\AmpKPass3\CTRL5	CTRL5_300ID_ZORBAX_ZED_TT_29May2014	923.92	7566.89	3	67318	45	199.114	9.76239
FGSSIASVR	CTRL5	D:\AmpK_Pass2\AmpKPass3\CTRL5	CTRL5_300ID_ZORBAX_ZED_TT_29May2014	923.92	7566.89	3	67318	121	371.827	9.20005
FGSSIASVR	CTRL5	D:\AmpK_Pass2\AmpKPass3\CTRL5	CTRL5_300ID_ZORBAX_ZED_TT_29May2014	923.92	7566.89	3	67318	109	326.982	8.90789
FGSSIASVR	CTRL5	D:\AmpK_Pass2\AmpKPass3\CTRL5	CTRL5_300ID_ZORBAX_ZED_TT_29May2014	923.92	7566.89	3	67318	34	187.16	8.84157
FGSSIASVR	CTRL5	D:\AmpK_Pass2\AmpKPass3\CTRL5	CTRL5_300ID_ZORBAX_ZED_TT_29May2014	923.92	7566.89	3	67318	75	257.144	8.79895
FGSSIASVR	CTRL5	D:\AmpK_Pass2\AmpKPass3\CTRL5	CTRL5_300ID_ZORBAX_ZED_TT_29May2014	923.92	7566.89	3	67318	128	416.977	8.78905
FGSSIASVR	CTRL5	D:\AmpK_Pass2\AmpKPass3\CTRL5	CTRL5_300ID_ZORBAX_ZED_TT_29May2014	923.92	7566.89	3	67318	21	163.002	8.5935
FGSSIASVR	CTRL5	D:\AmpK_Pass2\AmpKPass3\CTRL5	CTRL5_300ID_ZORBAX_ZED_TT_29May2014	923.92	7566.89	3	67318	90	281.576	8.49418
FGSSIASVR	CTRL5	D:\AmpK_Pass2\AmpKPass3\CTRL5	CTRL5_300ID_ZORBAX_ZED_TT_29May2014	923.92	7566.89	3	67318	72	252.445	8.48851
FGSSIASVR	CTRL5	D:\AmpK_Pass2\AmpKPass3\CTRL5	CTRL5_300ID_ZORBAX_ZED_TT_29May2014	923.92	7566.89	3	67318	91	282.296	8.4767
FGSSIASVR	CTRL5	D:\AmpK_Pass2\AmpKPass3\CTRL5	CTRL5_300ID_ZORBAX_ZED_TT_29May2014	923.92	7566.89	3	67318	106	316.2	8.39999
FGSSIASVR	CTRL5	D:\AmpK_Pass2\AmpKPass3\CTRL5	CTRL5_300ID_ZORBAX_ZED_TT_29May2014	923.92	7566.89	3	67318	51	217.077	8.34231
FGSSIASVR	CTRL5	D:\AmpK_Pass2\AmpKPass3\CTRL5	CTRL5_300ID_ZORBAX_ZED_TT_29May2014	923.92	7566.89	3	67318	88	276.818	8.33735
FGSSIASVR	CTRL5	D:\AmpK_Pass2\AmpKPass3\CTRL5	CTRL5_300ID_ZORBAX_ZED_TT_29May2014	923.92	7566.89	3	67318	81	266.269	8.17417
FGSSIASVR	CTRL5	D:\AmpK_Pass2\AmpKPass3\CTRL5	CTRL5_300ID_ZORBAX_ZED_TT_29May2014	923.92	7566.89	3	67318	93	284.46	7.85311
FGSSIASVR	CTRL5	D:\AmpK_Pass2\AmpKPass3\CTRL5	CTRL5_300ID_ZORBAX_ZED_TT_29May2014	923.92	7566.89	3	67318	30	181.31	7.84403
FGSSIASVR	CTRL5	D:\AmpK_Pass2\AmpKPass3\CTRL5	CTRL5_300ID_ZORBAX_ZED_TT_29May2014	923.92	7566.89	3	67318	41	194.066	7.69637
FGSSIASVR	CTRL5	D:\AmpK_Pass2\AmpKPass3\CTRL5	CTRL5_300ID_ZORBAX_ZED_TT_29May2014	923.92	7566.89	3	67318	137	492.78	7.63305
FGSSIASVR	CTRL5	D:\AmpK_Pass2\AmpKPass3\CTRL5	CTRL5_300ID_ZORBAX_ZED_TT_29May2014	923.92	7566.89	3	67318	29	179.229	7.54399
FGSSIASVR	CTRL5	D:\AmpK_Pass2\AmpKPass3\CTRL5	CTRL5_300ID_ZORBAX_ZED_TT_29May2014	923.92	7566.89	3	67318	3	111.218	7.50942
FGSSIASVR	CTRL5	D:\AmpK_Pass2\AmpKPass3\CTRL5	CTRL5_300ID_ZORBAX_ZED_TT_29May2014	923.92	7566.89	3	67318	47	204.155	7.46922
FGSSIASVR	CTRL5	D:\AmpK_Pass2\AmpKPass3\CTRL5	CTRL5_300ID_ZORBAX_ZED_TT_29May2014	923.92	7566.89	3	67318	16	147.033	7.44545
FGSSIASVR	CTRL5	D:\AmpK_Pass2\AmpKPass3\CTRL5	CTRL5_300ID_ZORBAX_ZED_TT_29May2014	923.92	7566.89	3	67318	123	374.582	7.1408
FGSSIASVR	CTRL5	D:\AmpK_Pass2\AmpKPass3\CTRL5	CTRL5_300ID_ZORBAX_ZED_TT_29May2014	923.92	7566.89	3	67318	48	204.967	7.06525
FGSSIASVR	CTRL5	D:\AmpK_Pass2\AmpKPass3\CTRL5	CTRL5_300ID_ZORBAX_ZED_TT_29May2014	923.92	7566.89	3	67318	42	194.983	6.91985
FGSSIASVR	CTRL5	D:\AmpK_Pass2\AmpKPass3\CTRL5	CTRL5_300ID_ZORBAX_ZED_TT_29May2014	923.92	7566.89	3	67318	36	189.54	6.86748
FGSSIASVR	CTRL5	D:\AmpK_Pass2\AmpKPass3\CTRL5	CTRL5_300ID_ZORBAX_ZED_TT_29May2014	923.92	7566.89	3	67318	10	137.117	6.69897
FGSSIASVR	CTRL5	D:\AmpK_Pass2\AmpKPass3\CTRL5	CTRL5_300ID_ZORBAX_ZED_TT_29May2014	923.92	7566.89	3	67318	35	188.039	6.37425
FGSSIASVR	CTRL5	D:\AmpK_Pass2\AmpKPass3\CTRL5	CTRL5_300ID_ZORBAX_ZED_TT_29May2014	923.92	7566.89	3	67318	131	434.817	6.36905
FGSSIASVR	CTRL5	D:\AmpK_Pass2\AmpKPass3\CTRL5	CTRL5_300ID_ZORBAX_ZED_TT_29May2014	923.92	7566.89	3	67318	57	227.132	6.16352
FGSSIASVR	CTRL5	D:\AmpK_Pass2\AmpKPass3\CTRL5	CTRL5_300ID_ZORBAX_ZED_TT_29May2014	923.92	7566.89	3	67318	13	143.28	6.06991
FGSSIASVR	CTRL5	D:\AmpK_Pass2\AmpKPass3\CTRL5	CTRL5_300ID_ZORBAX_ZED_TT_29May2014	923.92	7566.89	3	67318	89	277.627	6.05908
FGSSIASVR	CTRL5	D:\AmpK_Pass2\AmpKPass3\CTRL5	CTRL5_300ID_ZORBAX_ZED_TT_29May2014	923.92	7566.89	3	67318	103	302.241	6.03769
FGSSIASVR	CTRL5	D:\AmpK_Pass2\AmpKPass3\CTRL5	CTRL5_300ID_ZORBAX_ZED_TT_29May2014	923.92	7566.89	3	67318	39	191.862	5.8982
FGSSIASVR	CTRL5	D:\AmpK_Pass2\AmpKPass3\CTRL5	CTRL5_300ID_ZORBAX_ZED_TT_29May2014	923.92	7566.89	3	67318	119	364.778	5.84182
FGSSIASVR	CTRL5	D:\AmpK_Pass2\AmpKPass3\CTRL5	CTRL5_300ID_ZORBAX_ZED_TT_29May2014	923.92	7566.89	3	67318	66	246.489	5.3578
FGSSIASVR	CTRL5	D:\AmpK_Pass2\AmpKPass3\CTRL5	CTRL5_300ID_ZORBAX_ZED_TT_29May2014	923.92	7566.89	3	67318	105	310.286	5.29056
FGSSIASVR	CTRL5	D:\AmpK_Pass2\AmpKPass3\CTRL5	CTRL5_300ID_ZORBAX_ZED_TT_29May2014	923.92	7566.89	3	67318	54	221.677	5.21126
FGSSIASVR	CTRL5	D:\AmpK_Pass2\AmpKPass3\CTRL5	CTRL5_300ID_ZORBAX_ZED_TT_29May2014	923.92	7566.89	3	67318	14	144.184	4.85225
FGSSIASVR	CTRL5	D:\AmpK_Pass2\AmpKPass3\CTRL5	CTRL5_300ID_ZORBAX_ZED_TT_29May2014	923.92	7566.89	3	67318	134	459.325	4.80407
FGSSIASVR	CTRL5	D:\AmpK_Pass2\AmpKPass3\CTRL5	CTRL5_300ID_ZORBAX_ZED_TT_29May2014	923.92	7566.89	3	67318	133	458.596	4.79777
FGSSIASVR	CTRL5	D:\AmpK_Pass2\AmpKPass3\CTRL5	CTRL5_300ID_ZORBAX_ZED_TT_29May2014	923.92	7566.89	3	67318	23	164.861	4.36802
FGSSIASVR	CTRL5	D:\AmpK_Pass2\AmpKPass3\CTRL5	CTRL5_300ID_ZORBAX_ZED_TT_29May2014	923.92	7566.89	3	67318	132	444.076	4.34113
FGSSIASVR	CTRL5	D:\AmpK_Pass2\AmpKPass3\CTRL5	CTRL5_300ID_ZORBAX_ZED_TT_29May2014	923.92	7566.89	3	67318	19	159.24	4.15566
FGSSIASVR	CTRL5	D:\AmpK_Pass2\AmpKPass3\CTRL5	CTRL5_300ID_ZORBAX_ZED_TT_29May2014	923.92	7566.89	3	67318	11	140.498	3.73292
FGSSIASVR	CTRL5	D:\AmpK_Pass2\AmpKPass3\CTRL5	CTRL5_300ID_ZORBAX_ZED_TT_29May2014	923.92	7566.89	3	67318	126	402.497	3.72942
FGSSIASVR	CTRL5	D:\AmpK_Pass2\AmpKPass3\CTRL5	CTRL5_300ID_ZORBAX_ZED_TT_29May2014	923.92	7566.89	3	67318	60	236.037	3.72556
FGSSIASVR	CTRL5	D:\AmpK_Pass2\AmpKPass3\CTRL5	CTRL5_300ID_ZORBAX_ZED_TT_29May2014	923.92	7566.89	3	67318	25	169.205	3.71826
FGSSIASVR	CTRL5	D:\AmpK_Pass2\AmpKPass3\CTRL5	CTRL5_300ID_ZORBAX_ZED_TT_29May2014	923.92	7566.89	3	67318	24	166.971	3.69907
FGSSIASVR	CTRL5	D:\AmpK_Pass2\AmpKPass3\CTRL5	CTRL5_300ID_ZORBAX_ZED_TT_29May2014	923.92	7566.89	3	67318	84	269.265	3.52505
FGSSIASVR	CTRL5	D:\AmpK_Pass2\AmpKPass3\CTRL5	CTRL5_300ID_ZORBAX_ZED_TT_29May2014	923.92	7566.89	3	67318	52	217.998	3.51762
FGSSIASVR	CTRL5	D:\AmpK_Pass2\AmpKPass3\CTRL5	CTRL5_300ID_ZORBAX_ZED_TT_29May2014	923.92	7566.89	3	67318	4	115.148	3.30134
FGSSIASVR	CTRL5	D:\AmpK_Pass2\AmpKPass3\CTRL5	CTRL5_300ID_ZORBAX_ZED_TT_29May2014	923.92	7566.89	3	67318	32	184.279	3.28873
FGSSIASVR	CTRL5	D:\AmpK_Pass2\AmpKPass3\CTRL5	CTRL5_300ID_ZORBAX_ZED_TT_29May2014	923.92	7566.89	3	67318	65	245.144	3.21799
FGSSIASVR	CTRL5	D:\AmpK_Pass2\AmpKPass3\CTRL5	CTRL5_300ID_ZORBAX_ZED_TT_29May2014	923.92	7566.89	3	67318	129	418.517	3.09261
FGSSIASVR	CTRL5	D:\AmpK_Pass2\AmpKPass3\CTRL5	CTRL5_300ID_ZORBAX_ZED_TT_29May2014	923.92	7566.89	3	67318	22	163.932	2.90161
FGSSIASVR	CTRL5	D:\AmpK_Pass2\AmpKPass3\CTRL5	CTRL5_300ID_ZORBAX_ZED_TT_29May2014	923.92	7566.89	3	67318	15	145.248	2.86942
FGSSIASVR	CTRL5	D:\AmpK_Pass2\AmpKPass3\CTRL5	CTRL5_300ID_ZORBAX_ZED_TT_29May2014	923.92	7566.89	3	67318	111	336.565	2.74528
FGSSIASVR	CTRL5	D:\AmpK_Pass2\AmpKPass3\CTRL5	CTRL5_300ID_ZORBAX_ZED_TT_29May2014	923.92	7566.89	3	67318	18	153.18	2.66894
FGSSIASVR	CTRL5	D:\AmpK_Pass2\AmpKPass3\CTRL5	CTRL5_300ID_ZORBAX_ZED_TT_29May2014	923.92	7566.89	3	67318	122	373.333	2.66657
FGSSIASVR	CTRL5	D:\AmpK_Pass2\AmpKPass3\CTRL5	CTRL5_300ID_ZORBAX_ZED_TT_29May2014	923.92	7566.89	3	67318	50	209.116	2.66349
FGSSIASVR	CTRL5	D:\AmpK_Pass2\AmpKPass3\CTRL5	CTRL5_300ID_ZORBAX_ZED_TT_29May2014	923.92	7566.89	3	67318	20	160.931	2.64687
FGSSIASVR	CTRL5	D:\AmpK_Pass2\AmpKPass3\CTRL5	CTRL5_300ID_ZORBAX_ZED_TT_29May2014	923.92	7566.89	3	67318	17	151.222	2.47973
FGSSIASVR	CTRL5	D:\AmpK_Pass2\AmpKPass3\CTRL5	CTRL5_300ID_ZORBAX_ZED_TT_29May2014	923.92	7566.89	3	67318	12	142.182	2.45328
FGSSIASVR	CTRL5	D:\AmpK_Pass2\AmpKPass3\CTRL5	CTRL5_300ID_ZORBAX_ZED_TT_29May2014	923.92	7566.89	3	67318	26	172.156	2.45136
FGSSIASVR	CTRL5	D:\AmpK_Pass2\AmpKPass3\CTRL5	CTRL5_300ID_ZORBAX_ZED_TT_29May2014	923.92	7566.89	3	67318	58	229.985	2.45121
FGSSIASVR	CTRL5	D:\AmpK_Pass2\AmpKPass3\CTRL5	CTRL5_300ID_ZORBAX_ZED_TT_29May2014	923.92	7566.89	3	67318	53	219.136	2.44845
FGSSIASVR	CTRL5	D:\AmpK_Pass2\AmpKPass3\CTRL5	CTRL5_300ID_ZORBAX_ZED_TT_29May2014	923.92	7566.89	3	67318	44	197.956	2.44771
FGSSIASVR	CTRL5	D:\AmpK_Pass2\AmpKPass3\CTRL5	CTRL5_300ID_ZORBAX_ZED_TT_29May2014	923.92	7566.89	3	67318	116	345.531	2.24354
FGSSIASVR	CTRL5	D:\AmpK_Pass2\AmpKPass3\CTRL5	CTRL5_300ID_ZORBAX_ZED_TT_29May2014	923.92	7566.89	3	67318	33	185.922	2.24154
FGSSIASVR	CTRL5	D:\AmpK_Pass2\AmpKPass3\CTRL5	CTRL5_300ID_ZORBAX_ZED_TT_29May2014	923.92	7566.89	3	67318	138	538.261	2.23857
FGSSIASVR	CTRL5	D:\AmpK_Pass2\AmpKPass3\CTRL5	CTRL5_300ID_ZORBAX_ZED_TT_29May2014	923.92	7566.89	3	67318	6	119.19	2.23778
FGSSIASVR	CTRL5	D:\AmpK_Pass2\AmpKPass3\CTRL5	CTRL5_300ID_ZORBAX_ZED_TT_29May2014	923.92	7566.89	3	67318	56	224.272	2.05691
FGSSIASVR	CTRL5	D:\AmpK_Pass2\AmpKPass3\CTRL5	CTRL5_300ID_ZORBAX_ZED_TT_29May2014	923.92	7566.89	3	67318	1	93.039	2.0226
FGSSIASVR	CTRL5	D:\AmpK_Pass2\AmpKPass3\CTRL5	CTRL5_300ID_ZORBAX_ZED_TT_29May2014	923.92	7566.89	3	67318	135	465.008	1.81395
FGSSIASVR	CTRL5	D:\AmpK_Pass2\AmpKPass3\CTRL5	CTRL5_300ID_ZORBAX_ZED_TT_29May2014	923.92	7566.89	3	67318	9	125.054	1.81053
FGSSIASVR	CTRL5	D:\AmpK_Pass2\AmpKPass3\CTRL5	CTRL5_300ID_ZORBAX_ZED_TT_29May2014	923.92	7566.89	3	67318	46	202	1.60235
IMVNAALQRQFHSPFIFR	CTRL3	D:\AmpK_Pass2\AmpKPass3\CTRL3	CTRL3_300ID_ZORBAX_ZED_TT_03Apr2014	2176	13149.9	3	42792	170	590.934	182.299
IMVNAALQRQFHSPFIFR	CTRL2	D:\AmpK_Pass2\AmpKPass3\CTRL2	CTRL2_300ID_ZORBAX_ZED_TT_03Apr2014	2176	8269.86	3	48080	189	591.027	131.431
IMVNAALQRQFHSPFIFR	CTRL3	D:\AmpK_Pass2\AmpKPass3\CTRL3	CTRL3_300ID_ZORBAX_ZED_TT_03Apr2014	2176	13149.9	3	42792	291	916.649	120.343
IMVNAALQRQFHSPFIFR	CTRL3	D:\AmpK_Pass2\AmpKPass3\CTRL3	CTRL3_300ID_ZORBAX_ZED_TT_03Apr2014	2176	13149.9	3	42792	52	355.707	93.8955
IMVNAALQRQFHSPFIFR	CTRL3	D:\AmpK_Pass2\AmpKPass3\CTRL3	CTRL3_300ID_ZORBAX_ZED_TT_03Apr2014	2176	13149.9	3	42792	226	695.109	89.3948
IMVNAALQRQFHSPFIFR	CTRL3	D:\AmpK_Pass2\AmpKPass3\CTRL3	CTRL3_300ID_ZORBAX_ZED_TT_03Apr2014	2176	13149.9	3	42792	303	960.466	85.8745
IMVNAALQRQFHSPFIFR	CTRL3	D:\AmpK_Pass2\AmpKPass3\CTRL3	CTRL3_300ID_ZORBAX_ZED_TT_03Apr2014	2176	13149.9	3	42792	21	273.74	83.9393
IMVNAALQRQFHSPFIFR	CTRL3	D:\AmpK_Pass2\AmpKPass3\CTRL3	CTRL3_300ID_ZORBAX_ZED_TT_03Apr2014	2176	13149.9	3	42792	234	708.67	81.0746
IMVNAALQRQFHSPFIFR	CTRL3	D:\AmpK_Pass2\AmpKPass3\CTRL3	CTRL3_300ID_ZORBAX_ZED_TT_03Apr2014	2176	13149.9	3	42792	171	591.728	78.7548
IMVNAALQRQFHSPFIFR	CTRL3	D:\AmpK_Pass2\AmpKPass3\CTRL3	CTRL3_300ID_ZORBAX_ZED_TT_03Apr2014	2176	13149.9	3	42792	268	828.579	78.4523
IMVNAALQRQFHSPFIFR	CTRL3	D:\AmpK_Pass2\AmpKPass3\CTRL3	CTRL3_300ID_ZORBAX_ZED_TT_03Apr2014	2176	13149.9	3	42792	233	707.691	73.2737
IMVNAALQRQFHSPFIFR	CTRL3	D:\AmpK_Pass2\AmpKPass3\CTRL3	CTRL3_300ID_ZORBAX_ZED_TT_03Apr2014	2176	13149.9	3	42792	61	377.786	71.9885
IMVNAALQRQFHSPFIFR	CTRL3	D:\AmpK_Pass2\AmpKPass3\CTRL3	CTRL3_300ID_ZORBAX_ZED_TT_03Apr2014	2176	13149.9	3	42792	280	872.547	71.3363
IMVNAALQRQFHSPFIFR	CTRL3	D:\AmpK_Pass2\AmpKPass3\CTRL3	CTRL3_300ID_ZORBAX_ZED_TT_03Apr2014	2176	13149.9	3	42792	351	1212.73	67.6146
IMVNAALQRQFHSPFIFR	CTRL2	D:\AmpK_Pass2\AmpKPass3\CTRL2	CTRL2_300ID_ZORBAX_ZED_TT_03Apr2014	2176	8269.86	3	48080	263	707.835	66.1924
IMVNAALQRQFHSPFIFR	CTRL3	D:\AmpK_Pass2\AmpKPass3\CTRL3	CTRL3_300ID_ZORBAX_ZED_TT_03Apr2014	2176	13149.9	3	42792	67	385.312	64.5504
IMVNAALQRQFHSPFIFR	CTRL2	D:\AmpK_Pass2\AmpKPass3\CTRL2	CTRL2_300ID_ZORBAX_ZED_TT_03Apr2014	2176	8269.86	3	48080	264	708.698	58.8281
IMVNAALQRQFHSPFIFR	CTRL3	D:\AmpK_Pass2\AmpKPass3\CTRL3	CTRL3_300ID_ZORBAX_ZED_TT_03Apr2014	2176	13149.9	3	42792	340	1124.73	58.7887
IMVNAALQRQFHSPFIFR	CTRL3	D:\AmpK_Pass2\AmpKPass3\CTRL3	CTRL3_300ID_ZORBAX_ZED_TT_03Apr2014	2176	13149.9	3	42792	74	399.666	56.0369
IMVNAALQRQFHSPFIFR	CTRL3	D:\AmpK_Pass2\AmpKPass3\CTRL3	CTRL3_300ID_ZORBAX_ZED_TT_03Apr2014	2176	13149.9	3	42792	48	341.386	55.9086
IMVNAALQRQFHSPFIFR	CTRL2	D:\AmpK_Pass2\AmpKPass3\CTRL2	CTRL2_300ID_ZORBAX_ZED_TT_03Apr2014	2176	8269.86	3	48080	53	355.703	55.4147
IMVNAALQRQFHSPFIFR	CTRL3	D:\AmpK_Pass2\AmpKPass3\CTRL3	CTRL3_300ID_ZORBAX_ZED_TT_03Apr2014	2176	13149.9	3	42792	251	784.221	53.6676
IMVNAALQRQFHSPFIFR	CTRL3	D:\AmpK_Pass2\AmpKPass3\CTRL3	CTRL3_300ID_ZORBAX_ZED_TT_03Apr2014	2176	13149.9	3	42792	327	1048.71	53.3923
IMVNAALQRQFHSPFIFR	CTRL3	D:\AmpK_Pass2\AmpKPass3\CTRL3	CTRL3_300ID_ZORBAX_ZED_TT_03Apr2014	2176	13149.9	3	42792	32	309.301	52.4995
IMVNAALQRQFHSPFIFR	CTRL3	D:\AmpK_Pass2\AmpKPass3\CTRL3	CTRL3_300ID_ZORBAX_ZED_TT_03Apr2014	2176	13149.9	3	42792	213	673.271	52.138
IMVNAALQRQFHSPFIFR	CTRL3	D:\AmpK_Pass2\AmpKPass3\CTRL3	CTRL3_300ID_ZORBAX_ZED_TT_03Apr2014	2176	13149.9	3	42792	15	251.799	51.1992
IMVNAALQRQFHSPFIFR	CTRL3	D:\AmpK_Pass2\AmpKPass3\CTRL3	CTRL3_300ID_ZORBAX_ZED_TT_03Apr2014	2176	13149.9	3	42792	332	1080.81	51.1314
IMVNAALQRQFHSPFIFR	CTRL2	D:\AmpK_Pass2\AmpKPass3\CTRL2	CTRL2_300ID_ZORBAX_ZED_TT_03Apr2014	2176	8269.86	3	48080	67	385.404	46.9275
IMVNAALQRQFHSPFIFR	CTRL3	D:\AmpK_Pass2\AmpKPass3\CTRL3	CTRL3_300ID_ZORBAX_ZED_TT_03Apr2014	2176	13149.9	3	42792	4	221.078	45.1525
IMVNAALQRQFHSPFIFR	CTRL2	D:\AmpK_Pass2\AmpKPass3\CTRL2	CTRL2_300ID_ZORBAX_ZED_TT_03Apr2014	2176	8269.86	3	48080	359	1124.79	44.9747
IMVNAALQRQFHSPFIFR	CTRL3	D:\AmpK_Pass2\AmpKPass3\CTRL3	CTRL3_300ID_ZORBAX_ZED_TT_03Apr2014	2176	13149.9	3	42792	13	243.322	44.8352
IMVNAALQRQFHSPFIFR	CTRL2	D:\AmpK_Pass2\AmpKPass3\CTRL2	CTRL2_300ID_ZORBAX_ZED_TT_03Apr2014	2176	8269.86	3	48080	293	872.542	44.0458
IMVNAALQRQFHSPFIFR	CTRL3	D:\AmpK_Pass2\AmpKPass3\CTRL3	CTRL3_300ID_ZORBAX_ZED_TT_03Apr2014	2176	13149.9	3	42792	240	740.519	42.2011
IMVNAALQRQFHSPFIFR	CTRL3	D:\AmpK_Pass2\AmpKPass3\CTRL3	CTRL3_300ID_ZORBAX_ZED_TT_03Apr2014	2176	13149.9	3	42792	311	992.694	41.7716
IMVNAALQRQFHSPFIFR	CTRL3	D:\AmpK_Pass2\AmpKPass3\CTRL3	CTRL3_300ID_ZORBAX_ZED_TT_03Apr2014	2176	13149.9	3	42792	227	696.239	39.7939
IMVNAALQRQFHSPFIFR	CTRL3	D:\AmpK_Pass2\AmpKPass3\CTRL3	CTRL3_300ID_ZORBAX_ZED_TT_03Apr2014	2176	13149.9	3	42792	333	1081.79	39.6392
IMVNAALQRQFHSPFIFR	CTRL3	D:\AmpK_Pass2\AmpKPass3\CTRL3	CTRL3_300ID_ZORBAX_ZED_TT_03Apr2014	2176	13149.9	3	42792	323	1036.57	38.6552
IMVNAALQRQFHSPFIFR	CTRL3	D:\AmpK_Pass2\AmpKPass3\CTRL3	CTRL3_300ID_ZORBAX_ZED_TT_03Apr2014	2176	13149.9	3	42792	292	917.627	38.5579
IMVNAALQRQFHSPFIFR	CTRL3	D:\AmpK_Pass2\AmpKPass3\CTRL3	CTRL3_300ID_ZORBAX_ZED_TT_03Apr2014	2176	13149.9	3	42792	167	583.015	37.1564
IMVNAALQRQFHSPFIFR	CTRL3	D:\AmpK_Pass2\AmpKPass3\CTRL3	CTRL3_300ID_ZORBAX_ZED_TT_03Apr2014	2176	13149.9	3	42792	312	993.599	36.7562
IMVNAALQRQFHSPFIFR	CTRL2	D:\AmpK_Pass2\AmpKPass3\CTRL2	CTRL2_300ID_ZORBAX_ZED_TT_03Apr2014	2176	8269.86	3	48080	306	917.551	36.1166
IMVNAALQRQFHSPFIFR	CTRL3	D:\AmpK_Pass2\AmpKPass3\CTRL3	CTRL3_300ID_ZORBAX_ZED_TT_03Apr2014	2176	13149.9	3	42792	299	948.797	36.0885
IMVNAALQRQFHSPFIFR	CTRL3	D:\AmpK_Pass2\AmpKPass3\CTRL3	CTRL3_300ID_ZORBAX_ZED_TT_03Apr2014	2176	13149.9	3	42792	51	353.294	35.8716
IMVNAALQRQFHSPFIFR	CTRL2	D:\AmpK_Pass2\AmpKPass3\CTRL2	CTRL2_300ID_ZORBAX_ZED_TT_03Apr2014	2176	8269.86	3	48080	331	1004.62	35.4484
IMVNAALQRQFHSPFIFR	CTRL3	D:\AmpK_Pass2\AmpKPass3\CTRL3	CTRL3_300ID_ZORBAX_ZED_TT_03Apr2014	2176	13149.9	3	42792	281	873.578	35.0576
IMVNAALQRQFHSPFIFR	CTRL3	D:\AmpK_Pass2\AmpKPass3\CTRL3	CTRL3_300ID_ZORBAX_ZED_TT_03Apr2014	2176	13149.9	3	42792	84	422.249	34.5454
IMVNAALQRQFHSPFIFR	CTRL2	D:\AmpK_Pass2\AmpKPass3\CTRL2	CTRL2_300ID_ZORBAX_ZED_TT_03Apr2014	2176	8269.86	3	48080	317	960.491	34.4868
IMVNAALQRQFHSPFIFR	CTRL3	D:\AmpK_Pass2\AmpKPass3\CTRL3	CTRL3_300ID_ZORBAX_ZED_TT_03Apr2014	2176	13149.9	3	42792	175	597.697	34.2142
IMVNAALQRQFHSPFIFR	CTRL3	D:\AmpK_Pass2\AmpKPass3\CTRL3	CTRL3_300ID_ZORBAX_ZED_TT_03Apr2014	2176	13149.9	3	42792	17	265.126	34.1278
IMVNAALQRQFHSPFIFR	CTRL2	D:\AmpK_Pass2\AmpKPass3\CTRL2	CTRL2_300ID_ZORBAX_ZED_TT_03Apr2014	2176	8269.86	3	48080	256	695.551	34.055
IMVNAALQRQFHSPFIFR	CTRL3	D:\AmpK_Pass2\AmpKPass3\CTRL3	CTRL3_300ID_ZORBAX_ZED_TT_03Apr2014	2176	13149.9	3	42792	269	829.709	33.844
IMVNAALQRQFHSPFIFR	CTRL3	D:\AmpK_Pass2\AmpKPass3\CTRL3	CTRL3_300ID_ZORBAX_ZED_TT_03Apr2014	2176	13149.9	3	42792	107	469.072	33.4463
IMVNAALQRQFHSPFIFR	CTRL2	D:\AmpK_Pass2\AmpKPass3\CTRL2	CTRL2_300ID_ZORBAX_ZED_TT_03Apr2014	2176	8269.86	3	48080	75	399.814	33.1132
IMVNAALQRQFHSPFIFR	CTRL2	D:\AmpK_Pass2\AmpKPass3\CTRL2	CTRL2_300ID_ZORBAX_ZED_TT_03Apr2014	2176	8269.86	3	48080	273	784.519	33.015
IMVNAALQRQFHSPFIFR	CTRL3	D:\AmpK_Pass2\AmpKPass3\CTRL3	CTRL3_300ID_ZORBAX_ZED_TT_03Apr2014	2176	13149.9	3	42792	315	1004.7	32.9753
IMVNAALQRQFHSPFIFR	CTRL2	D:\AmpK_Pass2\AmpKPass3\CTRL2	CTRL2_300ID_ZORBAX_ZED_TT_03Apr2014	2176	8269.86	3	48080	281	828.59	32.9209
IMVNAALQRQFHSPFIFR	CTRL3	D:\AmpK_Pass2\AmpKPass3\CTRL3	CTRL3_300ID_ZORBAX_ZED_TT_03Apr2014	2176	13149.9	3	42792	357	1257.97	32.1228
IMVNAALQRQFHSPFIFR	CTRL3	D:\AmpK_Pass2\AmpKPass3\CTRL3	CTRL3_300ID_ZORBAX_ZED_TT_03Apr2014	2176	13149.9	3	42792	45	334.094	31.9834
IMVNAALQRQFHSPFIFR	CTRL3	D:\AmpK_Pass2\AmpKPass3\CTRL3	CTRL3_300ID_ZORBAX_ZED_TT_03Apr2014	2176	13149.9	3	42792	347	1168.72	31.6406
IMVNAALQRQFHSPFIFR	CTRL2	D:\AmpK_Pass2\AmpKPass3\CTRL2	CTRL2_300ID_ZORBAX_ZED_TT_03Apr2014	2176	8269.86	3	48080	3	221.295	31.2009
IMVNAALQRQFHSPFIFR	CTRL3	D:\AmpK_Pass2\AmpKPass3\CTRL3	CTRL3_300ID_ZORBAX_ZED_TT_03Apr2014	2176	13149.9	3	42792	27	295.575	31.1965
IMVNAALQRQFHSPFIFR	CTRL2	D:\AmpK_Pass2\AmpKPass3\CTRL2	CTRL2_300ID_ZORBAX_ZED_TT_03Apr2014	2176	8269.86	3	48080	337	1036.82	30.9149
IMVNAALQRQFHSPFIFR	CTRL2	D:\AmpK_Pass2\AmpKPass3\CTRL2	CTRL2_300ID_ZORBAX_ZED_TT_03Apr2014	2176	8269.86	3	48080	374	1212.89	30.697
IMVNAALQRQFHSPFIFR	CTRL2	D:\AmpK_Pass2\AmpKPass3\CTRL2	CTRL2_300ID_ZORBAX_ZED_TT_03Apr2014	2176	8269.86	3	48080	360	1125.77	30.5683
IMVNAALQRQFHSPFIFR	CTRL3	D:\AmpK_Pass2\AmpKPass3\CTRL3	CTRL3_300ID_ZORBAX_ZED_TT_03Apr2014	2176	13149.9	3	42792	335	1092.71	30.5474
IMVNAALQRQFHSPFIFR	CTRL3	D:\AmpK_Pass2\AmpKPass3\CTRL3	CTRL3_300ID_ZORBAX_ZED_TT_03Apr2014	2176	13149.9	3	42792	352	1213.63	30.4448
IMVNAALQRQFHSPFIFR	CTRL3	D:\AmpK_Pass2\AmpKPass3\CTRL3	CTRL3_300ID_ZORBAX_ZED_TT_03Apr2014	2176	13149.9	3	42792	53	356.54	29.4767
IMVNAALQRQFHSPFIFR	CTRL2	D:\AmpK_Pass2\AmpKPass3\CTRL2	CTRL2_300ID_ZORBAX_ZED_TT_03Apr2014	2176	8269.86	3	48080	342	1048.71	29.1703
IMVNAALQRQFHSPFIFR	CTRL2	D:\AmpK_Pass2\AmpKPass3\CTRL2	CTRL2_300ID_ZORBAX_ZED_TT_03Apr2014	2176	8269.86	3	48080	305	916.643	28.6246
IMVNAALQRQFHSPFIFR	CTRL3	D:\AmpK_Pass2\AmpKPass3\CTRL3	CTRL3_300ID_ZORBAX_ZED_TT_03Apr2014	2176	13149.9	3	42792	231	705.511	28.138
IMVNAALQRQFHSPFIFR	CTRL3	D:\AmpK_Pass2\AmpKPass3\CTRL3	CTRL3_300ID_ZORBAX_ZED_TT_03Apr2014	2176	13149.9	3	42792	209	663.736	28.073
IMVNAALQRQFHSPFIFR	CTRL2	D:\AmpK_Pass2\AmpKPass3\CTRL2	CTRL2_300ID_ZORBAX_ZED_TT_03Apr2014	2176	8269.86	3	48080	257	696.598	27.6956
IMVNAALQRQFHSPFIFR	CTRL2	D:\AmpK_Pass2\AmpKPass3\CTRL2	CTRL2_300ID_ZORBAX_ZED_TT_03Apr2014	2176	8269.86	3	48080	168	552.579	27.5539
IMVNAALQRQFHSPFIFR	CTRL2	D:\AmpK_Pass2\AmpKPass3\CTRL2	CTRL2_300ID_ZORBAX_ZED_TT_03Apr2014	2176	8269.86	3	48080	185	582.71	27.353
IMVNAALQRQFHSPFIFR	CTRL2	D:\AmpK_Pass2\AmpKPass3\CTRL2	CTRL2_300ID_ZORBAX_ZED_TT_03Apr2014	2176	8269.86	3	48080	14	265.376	27.2342
IMVNAALQRQFHSPFIFR	CTRL3	D:\AmpK_Pass2\AmpKPass3\CTRL3	CTRL3_300ID_ZORBAX_ZED_TT_03Apr2014	2176	13149.9	3	42792	149	552.49	26.8768
IMVNAALQRQFHSPFIFR	CTRL3	D:\AmpK_Pass2\AmpKPass3\CTRL3	CTRL3_300ID_ZORBAX_ZED_TT_03Apr2014	2176	13149.9	3	42792	38	317.826	26.8355
IMVNAALQRQFHSPFIFR	CTRL3	D:\AmpK_Pass2\AmpKPass3\CTRL3	CTRL3_300ID_ZORBAX_ZED_TT_03Apr2014	2176	13149.9	3	42792	96	443.777	26.7372
IMVNAALQRQFHSPFIFR	CTRL3	D:\AmpK_Pass2\AmpKPass3\CTRL3	CTRL3_300ID_ZORBAX_ZED_TT_03Apr2014	2176	13149.9	3	42792	122	491.528	26.3015
IMVNAALQRQFHSPFIFR	CTRL3	D:\AmpK_Pass2\AmpKPass3\CTRL3	CTRL3_300ID_ZORBAX_ZED_TT_03Apr2014	2176	13149.9	3	42792	130	508.715	26.0222
IMVNAALQRQFHSPFIFR	CTRL2	D:\AmpK_Pass2\AmpKPass3\CTRL2	CTRL2_300ID_ZORBAX_ZED_TT_03Apr2014	2176	8269.86	3	48080	20	273.743	25.6325
IMVNAALQRQFHSPFIFR	CTRL3	D:\AmpK_Pass2\AmpKPass3\CTRL3	CTRL3_300ID_ZORBAX_ZED_TT_03Apr2014	2176	13149.9	3	42792	235	709.6	25.5167
IMVNAALQRQFHSPFIFR	CTRL2	D:\AmpK_Pass2\AmpKPass3\CTRL2	CTRL2_300ID_ZORBAX_ZED_TT_03Apr2014	2176	8269.86	3	48080	7	229.696	25.2232
IMVNAALQRQFHSPFIFR	CTRL3	D:\AmpK_Pass2\AmpKPass3\CTRL3	CTRL3_300ID_ZORBAX_ZED_TT_03Apr2014	2176	13149.9	3	42792	341	1125.71	25.11
IMVNAALQRQFHSPFIFR	CTRL3	D:\AmpK_Pass2\AmpKPass3\CTRL3	CTRL3_300ID_ZORBAX_ZED_TT_03Apr2014	2176	13149.9	3	42792	142	535.643	24.7499
IMVNAALQRQFHSPFIFR	CTRL2	D:\AmpK_Pass2\AmpKPass3\CTRL2	CTRL2_300ID_ZORBAX_ZED_TT_03Apr2014	2176	8269.86	3	48080	86	421.906	24.5154
IMVNAALQRQFHSPFIFR	CTRL3	D:\AmpK_Pass2\AmpKPass3\CTRL3	CTRL3_300ID_ZORBAX_ZED_TT_03Apr2014	2176	13149.9	3	42792	252	784.962	24.395
IMVNAALQRQFHSPFIFR	CTRL3	D:\AmpK_Pass2\AmpKPass3\CTRL3	CTRL3_300ID_ZORBAX_ZED_TT_03Apr2014	2176	13149.9	3	42792	253	785.568	23.9595
IMVNAALQRQFHSPFIFR	CTRL3	D:\AmpK_Pass2\AmpKPass3\CTRL3	CTRL3_300ID_ZORBAX_ZED_TT_03Apr2014	2176	13149.9	3	42792	358	1259.13	23.7451
IMVNAALQRQFHSPFIFR	CTRL3	D:\AmpK_Pass2\AmpKPass3\CTRL3	CTRL3_300ID_ZORBAX_ZED_TT_03Apr2014	2176	13149.9	3	42792	166	582.082	23.6301
IMVNAALQRQFHSPFIFR	CTRL2	D:\AmpK_Pass2\AmpKPass3\CTRL2	CTRL2_300ID_ZORBAX_ZED_TT_03Apr2014	2176	8269.86	3	48080	110	453.345	23.6142
IMVNAALQRQFHSPFIFR	CTRL2	D:\AmpK_Pass2\AmpKPass3\CTRL2	CTRL2_300ID_ZORBAX_ZED_TT_03Apr2014	2176	8269.86	3	48080	265	709.446	23.0158
IMVNAALQRQFHSPFIFR	CTRL2	D:\AmpK_Pass2\AmpKPass3\CTRL2	CTRL2_300ID_ZORBAX_ZED_TT_03Apr2014	2176	8269.86	3	48080	350	1081.78	23.0123
IMVNAALQRQFHSPFIFR	CTRL2	D:\AmpK_Pass2\AmpKPass3\CTRL2	CTRL2_300ID_ZORBAX_ZED_TT_03Apr2014	2176	8269.86	3	48080	26	287.004	22.984
IMVNAALQRQFHSPFIFR	CTRL2	D:\AmpK_Pass2\AmpKPass3\CTRL2	CTRL2_300ID_ZORBAX_ZED_TT_03Apr2014	2176	8269.86	3	48080	64	378.514	22.9811
IMVNAALQRQFHSPFIFR	CTRL3	D:\AmpK_Pass2\AmpKPass3\CTRL3	CTRL3_300ID_ZORBAX_ZED_TT_03Apr2014	2176	13149.9	3	42792	34	311.361	22.8549
IMVNAALQRQFHSPFIFR	CTRL2	D:\AmpK_Pass2\AmpKPass3\CTRL2	CTRL2_300ID_ZORBAX_ZED_TT_03Apr2014	2176	8269.86	3	48080	349	1080.81	22.6274
IMVNAALQRQFHSPFIFR	CTRL3	D:\AmpK_Pass2\AmpKPass3\CTRL3	CTRL3_300ID_ZORBAX_ZED_TT_03Apr2014	2176	13149.9	3	42792	348	1169.85	22.4881
IMVNAALQRQFHSPFIFR	CTRL2	D:\AmpK_Pass2\AmpKPass3\CTRL2	CTRL2_300ID_ZORBAX_ZED_TT_03Apr2014	2176	8269.86	3	48080	375	1213.81	22.3854
IMVNAALQRQFHSPFIFR	CTRL3	D:\AmpK_Pass2\AmpKPass3\CTRL3	CTRL3_300ID_ZORBAX_ZED_TT_03Apr2014	2176	13149.9	3	42792	274	855.553	22.3542
IMVNAALQRQFHSPFIFR	CTRL2	D:\AmpK_Pass2\AmpKPass3\CTRL2	CTRL2_300ID_ZORBAX_ZED_TT_03Apr2014	2176	8269.86	3	48080	143	508.567	22.2223
IMVNAALQRQFHSPFIFR	CTRL2	D:\AmpK_Pass2\AmpKPass3\CTRL2	CTRL2_300ID_ZORBAX_ZED_TT_03Apr2014	2176	8269.86	3	48080	255	694.939	21.9897
IMVNAALQRQFHSPFIFR	CTRL2	D:\AmpK_Pass2\AmpKPass3\CTRL2	CTRL2_300ID_ZORBAX_ZED_TT_03Apr2014	2176	8269.86	3	48080	368	1169.87	21.9617
IMVNAALQRQFHSPFIFR	CTRL3	D:\AmpK_Pass2\AmpKPass3\CTRL3	CTRL3_300ID_ZORBAX_ZED_TT_03Apr2014	2176	13149.9	3	42792	293	918.607	21.915
IMVNAALQRQFHSPFIFR	CTRL3	D:\AmpK_Pass2\AmpKPass3\CTRL3	CTRL3_300ID_ZORBAX_ZED_TT_03Apr2014	2176	13149.9	3	42792	288	904.711	21.8342
IMVNAALQRQFHSPFIFR	CTRL3	D:\AmpK_Pass2\AmpKPass3\CTRL3	CTRL3_300ID_ZORBAX_ZED_TT_03Apr2014	2176	13149.9	3	42792	304	961.542	21.8241
IMVNAALQRQFHSPFIFR	CTRL3	D:\AmpK_Pass2\AmpKPass3\CTRL3	CTRL3_300ID_ZORBAX_ZED_TT_03Apr2014	2176	13149.9	3	42792	324	1037.45	21.7829
IMVNAALQRQFHSPFIFR	CTRL3	D:\AmpK_Pass2\AmpKPass3\CTRL3	CTRL3_300ID_ZORBAX_ZED_TT_03Apr2014	2176	13149.9	3	42792	72	397.297	21.6716
IMVNAALQRQFHSPFIFR	CTRL2	D:\AmpK_Pass2\AmpKPass3\CTRL2	CTRL2_300ID_ZORBAX_ZED_TT_03Apr2014	2176	8269.86	3	48080	54	356.348	21.4147
IMVNAALQRQFHSPFIFR	CTRL2	D:\AmpK_Pass2\AmpKPass3\CTRL2	CTRL2_300ID_ZORBAX_ZED_TT_03Apr2014	2176	8269.86	3	48080	318	961.633	21.4028
IMVNAALQRQFHSPFIFR	CTRL2	D:\AmpK_Pass2\AmpKPass3\CTRL2	CTRL2_300ID_ZORBAX_ZED_TT_03Apr2014	2176	8269.86	3	48080	47	340.24	20.8191
IMVNAALQRQFHSPFIFR	CTRL3	D:\AmpK_Pass2\AmpKPass3\CTRL3	CTRL3_300ID_ZORBAX_ZED_TT_03Apr2014	2176	13149.9	3	42792	132	510.413	20.813
IMVNAALQRQFHSPFIFR	CTRL3	D:\AmpK_Pass2\AmpKPass3\CTRL3	CTRL3_300ID_ZORBAX_ZED_TT_03Apr2014	2176	13149.9	3	42792	361	1302.1	20.7848
IMVNAALQRQFHSPFIFR	CTRL2	D:\AmpK_Pass2\AmpKPass3\CTRL2	CTRL2_300ID_ZORBAX_ZED_TT_03Apr2014	2176	8269.86	3	48080	28	295.411	20.7686
IMVNAALQRQFHSPFIFR	CTRL2	D:\AmpK_Pass2\AmpKPass3\CTRL2	CTRL2_300ID_ZORBAX_ZED_TT_03Apr2014	2176	8269.86	3	48080	252	689.876	19.3906
IMVNAALQRQFHSPFIFR	CTRL2	D:\AmpK_Pass2\AmpKPass3\CTRL2	CTRL2_300ID_ZORBAX_ZED_TT_03Apr2014	2176	8269.86	3	48080	241	673.277	19.014
IMVNAALQRQFHSPFIFR	CTRL2	D:\AmpK_Pass2\AmpKPass3\CTRL2	CTRL2_300ID_ZORBAX_ZED_TT_03Apr2014	2176	8269.86	3	48080	63	377.71	18.9711
IMVNAALQRQFHSPFIFR	CTRL3	D:\AmpK_Pass2\AmpKPass3\CTRL3	CTRL3_300ID_ZORBAX_ZED_TT_03Apr2014	2176	13149.9	3	42792	59	370.267	18.7901
IMVNAALQRQFHSPFIFR	CTRL3	D:\AmpK_Pass2\AmpKPass3\CTRL3	CTRL3_300ID_ZORBAX_ZED_TT_03Apr2014	2176	13149.9	3	42792	66	384.161	18.7054
IMVNAALQRQFHSPFIFR	CTRL2	D:\AmpK_Pass2\AmpKPass3\CTRL2	CTRL2_300ID_ZORBAX_ZED_TT_03Apr2014	2176	8269.86	3	48080	343	1049.54	18.6941
IMVNAALQRQFHSPFIFR	CTRL2	D:\AmpK_Pass2\AmpKPass3\CTRL2	CTRL2_300ID_ZORBAX_ZED_TT_03Apr2014	2176	8269.86	3	48080	22	282.201	18.6356
IMVNAALQRQFHSPFIFR	CTRL3	D:\AmpK_Pass2\AmpKPass3\CTRL3	CTRL3_300ID_ZORBAX_ZED_TT_03Apr2014	2176	13149.9	3	42792	177	605.214	18.632
IMVNAALQRQFHSPFIFR	CTRL2	D:\AmpK_Pass2\AmpKPass3\CTRL2	CTRL2_300ID_ZORBAX_ZED_TT_03Apr2014	2176	8269.86	3	48080	379	1257.76	18.6147
IMVNAALQRQFHSPFIFR	CTRL2	D:\AmpK_Pass2\AmpKPass3\CTRL2	CTRL2_300ID_ZORBAX_ZED_TT_03Apr2014	2176	8269.86	3	48080	38	326.276	18.5413
IMVNAALQRQFHSPFIFR	CTRL3	D:\AmpK_Pass2\AmpKPass3\CTRL3	CTRL3_300ID_ZORBAX_ZED_TT_03Apr2014	2176	13149.9	3	42792	86	428.033	18.437
IMVNAALQRQFHSPFIFR	CTRL3	D:\AmpK_Pass2\AmpKPass3\CTRL3	CTRL3_300ID_ZORBAX_ZED_TT_03Apr2014	2176	13149.9	3	42792	145	539.297	18.4158
IMVNAALQRQFHSPFIFR	CTRL2	D:\AmpK_Pass2\AmpKPass3\CTRL2	CTRL2_300ID_ZORBAX_ZED_TT_03Apr2014	2176	8269.86	3	48080	277	811.394	18.0373
IMVNAALQRQFHSPFIFR	CTRL3	D:\AmpK_Pass2\AmpKPass3\CTRL3	CTRL3_300ID_ZORBAX_ZED_TT_03Apr2014	2176	13149.9	3	42792	9	229.533	17.6832
IMVNAALQRQFHSPFIFR	CTRL3	D:\AmpK_Pass2\AmpKPass3\CTRL3	CTRL3_300ID_ZORBAX_ZED_TT_03Apr2014	2176	13149.9	3	42792	356	1257.29	17.6783
IMVNAALQRQFHSPFIFR	CTRL3	D:\AmpK_Pass2\AmpKPass3\CTRL3	CTRL3_300ID_ZORBAX_ZED_TT_03Apr2014	2176	13149.9	3	42792	202	652.266	17.2922
IMVNAALQRQFHSPFIFR	CTRL2	D:\AmpK_Pass2\AmpKPass3\CTRL2	CTRL2_300ID_ZORBAX_ZED_TT_03Apr2014	2176	8269.86	3	48080	48	341.327	17.2825
IMVNAALQRQFHSPFIFR	CTRL2	D:\AmpK_Pass2\AmpKPass3\CTRL2	CTRL2_300ID_ZORBAX_ZED_TT_03Apr2014	2176	8269.86	3	48080	100	441.352	17.0426
IMVNAALQRQFHSPFIFR	CTRL3	D:\AmpK_Pass2\AmpKPass3\CTRL3	CTRL3_300ID_ZORBAX_ZED_TT_03Apr2014	2176	13149.9	3	42792	23	282.257	16.8409
IMVNAALQRQFHSPFIFR	CTRL3	D:\AmpK_Pass2\AmpKPass3\CTRL3	CTRL3_300ID_ZORBAX_ZED_TT_03Apr2014	2176	13149.9	3	42792	123	493.861	16.6891
IMVNAALQRQFHSPFIFR	CTRL2	D:\AmpK_Pass2\AmpKPass3\CTRL2	CTRL2_300ID_ZORBAX_ZED_TT_03Apr2014	2176	8269.86	3	48080	316	949.923	16.6441
IMVNAALQRQFHSPFIFR	CTRL3	D:\AmpK_Pass2\AmpKPass3\CTRL3	CTRL3_300ID_ZORBAX_ZED_TT_03Apr2014	2176	13149.9	3	42792	196	642.393	16.5144
IMVNAALQRQFHSPFIFR	CTRL3	D:\AmpK_Pass2\AmpKPass3\CTRL3	CTRL3_300ID_ZORBAX_ZED_TT_03Apr2014	2176	13149.9	3	42792	309	988.429	16.3704
IMVNAALQRQFHSPFIFR	CTRL3	D:\AmpK_Pass2\AmpKPass3\CTRL3	CTRL3_300ID_ZORBAX_ZED_TT_03Apr2014	2176	13149.9	3	42792	339	1108.81	16.3536
IMVNAALQRQFHSPFIFR	CTRL2	D:\AmpK_Pass2\AmpKPass3\CTRL2	CTRL2_300ID_ZORBAX_ZED_TT_03Apr2014	2176	8269.86	3	48080	367	1168.85	16.3415
IMVNAALQRQFHSPFIFR	CTRL2	D:\AmpK_Pass2\AmpKPass3\CTRL2	CTRL2_300ID_ZORBAX_ZED_TT_03Apr2014	2176	8269.86	3	48080	194	597.593	16.1107
IMVNAALQRQFHSPFIFR	CTRL3	D:\AmpK_Pass2\AmpKPass3\CTRL3	CTRL3_300ID_ZORBAX_ZED_TT_03Apr2014	2176	13149.9	3	42792	286	900.619	16.0928
IMVNAALQRQFHSPFIFR	CTRL3	D:\AmpK_Pass2\AmpKPass3\CTRL3	CTRL3_300ID_ZORBAX_ZED_TT_03Apr2014	2176	13149.9	3	42792	355	1256.47	16.0192
IMVNAALQRQFHSPFIFR	CTRL3	D:\AmpK_Pass2\AmpKPass3\CTRL3	CTRL3_300ID_ZORBAX_ZED_TT_03Apr2014	2176	13149.9	3	42792	137	523.386	15.9946
IMVNAALQRQFHSPFIFR	CTRL3	D:\AmpK_Pass2\AmpKPass3\CTRL3	CTRL3_300ID_ZORBAX_ZED_TT_03Apr2014	2176	13149.9	3	42792	164	579.842	15.9285
IMVNAALQRQFHSPFIFR	CTRL3	D:\AmpK_Pass2\AmpKPass3\CTRL3	CTRL3_300ID_ZORBAX_ZED_TT_03Apr2014	2176	13149.9	3	42792	261	811.531	15.767
IMVNAALQRQFHSPFIFR	CTRL3	D:\AmpK_Pass2\AmpKPass3\CTRL3	CTRL3_300ID_ZORBAX_ZED_TT_03Apr2014	2176	13149.9	3	42792	295	943.332	15.7491
IMVNAALQRQFHSPFIFR	CTRL2	D:\AmpK_Pass2\AmpKPass3\CTRL2	CTRL2_300ID_ZORBAX_ZED_TT_03Apr2014	2176	8269.86	3	48080	232	663.466	15.4083
IMVNAALQRQFHSPFIFR	CTRL2	D:\AmpK_Pass2\AmpKPass3\CTRL2	CTRL2_300ID_ZORBAX_ZED_TT_03Apr2014	2176	8269.86	3	48080	33	309.294	15.3689
IMVNAALQRQFHSPFIFR	CTRL2	D:\AmpK_Pass2\AmpKPass3\CTRL2	CTRL2_300ID_ZORBAX_ZED_TT_03Apr2014	2176	8269.86	3	48080	12	251.735	15.2431
IMVNAALQRQFHSPFIFR	CTRL3	D:\AmpK_Pass2\AmpKPass3\CTRL3	CTRL3_300ID_ZORBAX_ZED_TT_03Apr2014	2176	13149.9	3	42792	141	532.085	15.198
IMVNAALQRQFHSPFIFR	CTRL3	D:\AmpK_Pass2\AmpKPass3\CTRL3	CTRL3_300ID_ZORBAX_ZED_TT_03Apr2014	2176	13149.9	3	42792	144	538.324	15.1739
IMVNAALQRQFHSPFIFR	CTRL3	D:\AmpK_Pass2\AmpKPass3\CTRL3	CTRL3_300ID_ZORBAX_ZED_TT_03Apr2014	2176	13149.9	3	42792	334	1082.78	15.0312
IMVNAALQRQFHSPFIFR	CTRL2	D:\AmpK_Pass2\AmpKPass3\CTRL2	CTRL2_300ID_ZORBAX_ZED_TT_03Apr2014	2176	8269.86	3	48080	144	509.401	14.9864
IMVNAALQRQFHSPFIFR	CTRL2	D:\AmpK_Pass2\AmpKPass3\CTRL2	CTRL2_300ID_ZORBAX_ZED_TT_03Apr2014	2176	8269.86	3	48080	245	680.269	14.9648
IMVNAALQRQFHSPFIFR	CTRL3	D:\AmpK_Pass2\AmpKPass3\CTRL3	CTRL3_300ID_ZORBAX_ZED_TT_03Apr2014	2176	13149.9	3	42792	219	681.444	14.8209
IMVNAALQRQFHSPFIFR	CTRL2	D:\AmpK_Pass2\AmpKPass3\CTRL2	CTRL2_300ID_ZORBAX_ZED_TT_03Apr2014	2176	8269.86	3	48080	73	397.346	14.7386
IMVNAALQRQFHSPFIFR	CTRL3	D:\AmpK_Pass2\AmpKPass3\CTRL3	CTRL3_300ID_ZORBAX_ZED_TT_03Apr2014	2176	13149.9	3	42792	119	485.119	14.7329
IMVNAALQRQFHSPFIFR	CTRL3	D:\AmpK_Pass2\AmpKPass3\CTRL3	CTRL3_300ID_ZORBAX_ZED_TT_03Apr2014	2176	13149.9	3	42792	24	283.17	14.7057
IMVNAALQRQFHSPFIFR	CTRL3	D:\AmpK_Pass2\AmpKPass3\CTRL3	CTRL3_300ID_ZORBAX_ZED_TT_03Apr2014	2176	13149.9	3	42792	353	1214.86	14.6609
IMVNAALQRQFHSPFIFR	CTRL3	D:\AmpK_Pass2\AmpKPass3\CTRL3	CTRL3_300ID_ZORBAX_ZED_TT_03Apr2014	2176	13149.9	3	42792	62	378.423	14.5777
IMVNAALQRQFHSPFIFR	CTRL3	D:\AmpK_Pass2\AmpKPass3\CTRL3	CTRL3_300ID_ZORBAX_ZED_TT_03Apr2014	2176	13149.9	3	42792	285	899.447	14.5464
IMVNAALQRQFHSPFIFR	CTRL3	D:\AmpK_Pass2\AmpKPass3\CTRL3	CTRL3_300ID_ZORBAX_ZED_TT_03Apr2014	2176	13149.9	3	42792	162	575.978	14.5413
IMVNAALQRQFHSPFIFR	CTRL2	D:\AmpK_Pass2\AmpKPass3\CTRL2	CTRL2_300ID_ZORBAX_ZED_TT_03Apr2014	2176	8269.86	3	48080	329	992.767	14.5375
IMVNAALQRQFHSPFIFR	CTRL3	D:\AmpK_Pass2\AmpKPass3\CTRL3	CTRL3_300ID_ZORBAX_ZED_TT_03Apr2014	2176	13149.9	3	42792	201	651.121	14.5321
IMVNAALQRQFHSPFIFR	CTRL2	D:\AmpK_Pass2\AmpKPass3\CTRL2	CTRL2_300ID_ZORBAX_ZED_TT_03Apr2014	2176	8269.86	3	48080	268	740.721	14.4121
IMVNAALQRQFHSPFIFR	CTRL3	D:\AmpK_Pass2\AmpKPass3\CTRL3	CTRL3_300ID_ZORBAX_ZED_TT_03Apr2014	2176	13149.9	3	42792	33	310.452	14.3983
IMVNAALQRQFHSPFIFR	CTRL3	D:\AmpK_Pass2\AmpKPass3\CTRL3	CTRL3_300ID_ZORBAX_ZED_TT_03Apr2014	2176	13149.9	3	42792	223	690.779	14.2748
IMVNAALQRQFHSPFIFR	CTRL3	D:\AmpK_Pass2\AmpKPass3\CTRL3	CTRL3_300ID_ZORBAX_ZED_TT_03Apr2014	2176	13149.9	3	42792	43	327.206	14.0931
IMVNAALQRQFHSPFIFR	CTRL3	D:\AmpK_Pass2\AmpKPass3\CTRL3	CTRL3_300ID_ZORBAX_ZED_TT_03Apr2014	2176	13149.9	3	42792	328	1049.86	14.0572
IMVNAALQRQFHSPFIFR	CTRL2	D:\AmpK_Pass2\AmpKPass3\CTRL2	CTRL2_300ID_ZORBAX_ZED_TT_03Apr2014	2176	8269.86	3	48080	161	539.045	14.054
IMVNAALQRQFHSPFIFR	CTRL3	D:\AmpK_Pass2\AmpKPass3\CTRL3	CTRL3_300ID_ZORBAX_ZED_TT_03Apr2014	2176	13149.9	3	42792	199	649.289	14.0113
IMVNAALQRQFHSPFIFR	CTRL3	D:\AmpK_Pass2\AmpKPass3\CTRL3	CTRL3_300ID_ZORBAX_ZED_TT_03Apr2014	2176	13149.9	3	42792	222	689.928	13.8354
IMVNAALQRQFHSPFIFR	CTRL2	D:\AmpK_Pass2\AmpKPass3\CTRL2	CTRL2_300ID_ZORBAX_ZED_TT_03Apr2014	2176	8269.86	3	48080	116	460.49	13.7288
IMVNAALQRQFHSPFIFR	CTRL3	D:\AmpK_Pass2\AmpKPass3\CTRL3	CTRL3_300ID_ZORBAX_ZED_TT_03Apr2014	2176	13149.9	3	42792	210	664.838	13.726
IMVNAALQRQFHSPFIFR	CTRL3	D:\AmpK_Pass2\AmpKPass3\CTRL3	CTRL3_300ID_ZORBAX_ZED_TT_03Apr2014	2176	13149.9	3	42792	221	685.795	13.72
IMVNAALQRQFHSPFIFR	CTRL2	D:\AmpK_Pass2\AmpKPass3\CTRL2	CTRL2_300ID_ZORBAX_ZED_TT_03Apr2014	2176	8269.86	3	48080	103	444.351	13.3671
IMVNAALQRQFHSPFIFR	CTRL3	D:\AmpK_Pass2\AmpKPass3\CTRL3	CTRL3_300ID_ZORBAX_ZED_TT_03Apr2014	2176	13149.9	3	42792	316	1005.72	13.3408
IMVNAALQRQFHSPFIFR	CTRL3	D:\AmpK_Pass2\AmpKPass3\CTRL3	CTRL3_300ID_ZORBAX_ZED_TT_03Apr2014	2176	13149.9	3	42792	342	1126.86	13.2348
IMVNAALQRQFHSPFIFR	CTRL2	D:\AmpK_Pass2\AmpKPass3\CTRL2	CTRL2_300ID_ZORBAX_ZED_TT_03Apr2014	2176	8269.86	3	48080	9	238.04	13.1961
IMVNAALQRQFHSPFIFR	CTRL2	D:\AmpK_Pass2\AmpKPass3\CTRL2	CTRL2_300ID_ZORBAX_ZED_TT_03Apr2014	2176	8269.86	3	48080	274	785.635	13.1288
IMVNAALQRQFHSPFIFR	CTRL3	D:\AmpK_Pass2\AmpKPass3\CTRL3	CTRL3_300ID_ZORBAX_ZED_TT_03Apr2014	2176	13149.9	3	42792	322	1032.73	12.9646
IMVNAALQRQFHSPFIFR	CTRL3	D:\AmpK_Pass2\AmpKPass3\CTRL3	CTRL3_300ID_ZORBAX_ZED_TT_03Apr2014	2176	13149.9	3	42792	349	1170.83	12.8937
IMVNAALQRQFHSPFIFR	CTRL2	D:\AmpK_Pass2\AmpKPass3\CTRL2	CTRL2_300ID_ZORBAX_ZED_TT_03Apr2014	2176	8269.86	3	48080	51	353.193	12.8768
IMVNAALQRQFHSPFIFR	CTRL3	D:\AmpK_Pass2\AmpKPass3\CTRL3	CTRL3_300ID_ZORBAX_ZED_TT_03Apr2014	2176	13149.9	3	42792	146	546.868	12.7318
IMVNAALQRQFHSPFIFR	CTRL3	D:\AmpK_Pass2\AmpKPass3\CTRL3	CTRL3_300ID_ZORBAX_ZED_TT_03Apr2014	2176	13149.9	3	42792	220	684.754	12.591
IMVNAALQRQFHSPFIFR	CTRL2	D:\AmpK_Pass2\AmpKPass3\CTRL2	CTRL2_300ID_ZORBAX_ZED_TT_03Apr2014	2176	8269.86	3	48080	131	485.752	12.4883
IMVNAALQRQFHSPFIFR	CTRL3	D:\AmpK_Pass2\AmpKPass3\CTRL3	CTRL3_300ID_ZORBAX_ZED_TT_03Apr2014	2176	13149.9	3	42792	76	405.136	12.4849
IMVNAALQRQFHSPFIFR	CTRL3	D:\AmpK_Pass2\AmpKPass3\CTRL3	CTRL3_300ID_ZORBAX_ZED_TT_03Apr2014	2176	13149.9	3	42792	49	342.399	12.4615
IMVNAALQRQFHSPFIFR	CTRL2	D:\AmpK_Pass2\AmpKPass3\CTRL2	CTRL2_300ID_ZORBAX_ZED_TT_03Apr2014	2176	8269.86	3	48080	338	1038.08	12.2589
IMVNAALQRQFHSPFIFR	CTRL3	D:\AmpK_Pass2\AmpKPass3\CTRL3	CTRL3_300ID_ZORBAX_ZED_TT_03Apr2014	2176	13149.9	3	42792	85	425.091	12.1892
IMVNAALQRQFHSPFIFR	CTRL3	D:\AmpK_Pass2\AmpKPass3\CTRL3	CTRL3_300ID_ZORBAX_ZED_TT_03Apr2014	2176	13149.9	3	42792	350	1196.47	12.1673
IMVNAALQRQFHSPFIFR	CTRL3	D:\AmpK_Pass2\AmpKPass3\CTRL3	CTRL3_300ID_ZORBAX_ZED_TT_03Apr2014	2176	13149.9	3	42792	135	516.999	12.1384
IMVNAALQRQFHSPFIFR	CTRL2	D:\AmpK_Pass2\AmpKPass3\CTRL2	CTRL2_300ID_ZORBAX_ZED_TT_03Apr2014	2176	8269.86	3	48080	234	665.362	12.1369
IMVNAALQRQFHSPFIFR	CTRL3	D:\AmpK_Pass2\AmpKPass3\CTRL3	CTRL3_300ID_ZORBAX_ZED_TT_03Apr2014	2176	13149.9	3	42792	158	567.622	11.9813
IMVNAALQRQFHSPFIFR	CTRL3	D:\AmpK_Pass2\AmpKPass3\CTRL3	CTRL3_300ID_ZORBAX_ZED_TT_03Apr2014	2176	13149.9	3	42792	205	657.588	11.9074
IMVNAALQRQFHSPFIFR	CTRL3	D:\AmpK_Pass2\AmpKPass3\CTRL3	CTRL3_300ID_ZORBAX_ZED_TT_03Apr2014	2176	13149.9	3	42792	208	662.48	11.8484
IMVNAALQRQFHSPFIFR	CTRL3	D:\AmpK_Pass2\AmpKPass3\CTRL3	CTRL3_300ID_ZORBAX_ZED_TT_03Apr2014	2176	13149.9	3	42792	247	766.466	11.8131
IMVNAALQRQFHSPFIFR	CTRL3	D:\AmpK_Pass2\AmpKPass3\CTRL3	CTRL3_300ID_ZORBAX_ZED_TT_03Apr2014	2176	13149.9	3	42792	94	441.349	11.7654
IMVNAALQRQFHSPFIFR	CTRL3	D:\AmpK_Pass2\AmpKPass3\CTRL3	CTRL3_300ID_ZORBAX_ZED_TT_03Apr2014	2176	13149.9	3	42792	159	568.983	11.7422
IMVNAALQRQFHSPFIFR	CTRL3	D:\AmpK_Pass2\AmpKPass3\CTRL3	CTRL3_300ID_ZORBAX_ZED_TT_03Apr2014	2176	13149.9	3	42792	318	1020.55	11.7337
IMVNAALQRQFHSPFIFR	CTRL2	D:\AmpK_Pass2\AmpKPass3\CTRL2	CTRL2_300ID_ZORBAX_ZED_TT_03Apr2014	2176	8269.86	3	48080	138	498.406	11.7184
IMVNAALQRQFHSPFIFR	CTRL3	D:\AmpK_Pass2\AmpKPass3\CTRL3	CTRL3_300ID_ZORBAX_ZED_TT_03Apr2014	2176	13149.9	3	42792	344	1151.6	11.668
IMVNAALQRQFHSPFIFR	CTRL3	D:\AmpK_Pass2\AmpKPass3\CTRL3	CTRL3_300ID_ZORBAX_ZED_TT_03Apr2014	2176	13149.9	3	42792	181	609.537	11.6294
IMVNAALQRQFHSPFIFR	CTRL3	D:\AmpK_Pass2\AmpKPass3\CTRL3	CTRL3_300ID_ZORBAX_ZED_TT_03Apr2014	2176	13149.9	3	42792	5	222.187	11.5636
IMVNAALQRQFHSPFIFR	CTRL2	D:\AmpK_Pass2\AmpKPass3\CTRL2	CTRL2_300ID_ZORBAX_ZED_TT_03Apr2014	2176	8269.86	3	48080	183	578.832	11.4538
IMVNAALQRQFHSPFIFR	CTRL3	D:\AmpK_Pass2\AmpKPass3\CTRL3	CTRL3_300ID_ZORBAX_ZED_TT_03Apr2014	2176	13149.9	3	42792	151	554.565	11.249
IMVNAALQRQFHSPFIFR	CTRL3	D:\AmpK_Pass2\AmpKPass3\CTRL3	CTRL3_300ID_ZORBAX_ZED_TT_03Apr2014	2176	13149.9	3	42792	275	856.834	11.2326
IMVNAALQRQFHSPFIFR	CTRL2	D:\AmpK_Pass2\AmpKPass3\CTRL2	CTRL2_300ID_ZORBAX_ZED_TT_03Apr2014	2176	8269.86	3	48080	23	283.292	11.0955
IMVNAALQRQFHSPFIFR	CTRL2	D:\AmpK_Pass2\AmpKPass3\CTRL2	CTRL2_300ID_ZORBAX_ZED_TT_03Apr2014	2176	8269.86	3	48080	225	651.575	11.0888
IMVNAALQRQFHSPFIFR	CTRL3	D:\AmpK_Pass2\AmpKPass3\CTRL3	CTRL3_300ID_ZORBAX_ZED_TT_03Apr2014	2176	13149.9	3	42792	191	634.228	11.0718
IMVNAALQRQFHSPFIFR	CTRL2	D:\AmpK_Pass2\AmpKPass3\CTRL2	CTRL2_300ID_ZORBAX_ZED_TT_03Apr2014	2176	8269.86	3	48080	83	415.32	11.0039
IMVNAALQRQFHSPFIFR	CTRL2	D:\AmpK_Pass2\AmpKPass3\CTRL2	CTRL2_300ID_ZORBAX_ZED_TT_03Apr2014	2176	8269.86	3	48080	258	697.654	10.9888
IMVNAALQRQFHSPFIFR	CTRL2	D:\AmpK_Pass2\AmpKPass3\CTRL2	CTRL2_300ID_ZORBAX_ZED_TT_03Apr2014	2176	8269.86	3	48080	383	1301.92	10.9279
IMVNAALQRQFHSPFIFR	CTRL2	D:\AmpK_Pass2\AmpKPass3\CTRL2	CTRL2_300ID_ZORBAX_ZED_TT_03Apr2014	2176	8269.86	3	48080	191	593.511	10.8638
IMVNAALQRQFHSPFIFR	CTRL3	D:\AmpK_Pass2\AmpKPass3\CTRL3	CTRL3_300ID_ZORBAX_ZED_TT_03Apr2014	2176	13149.9	3	42792	150	553.675	10.8531
IMVNAALQRQFHSPFIFR	CTRL3	D:\AmpK_Pass2\AmpKPass3\CTRL3	CTRL3_300ID_ZORBAX_ZED_TT_03Apr2014	2176	13149.9	3	42792	211	666.565	10.8023
IMVNAALQRQFHSPFIFR	CTRL3	D:\AmpK_Pass2\AmpKPass3\CTRL3	CTRL3_300ID_ZORBAX_ZED_TT_03Apr2014	2176	13149.9	3	42792	192	635.518	10.6427
IMVNAALQRQFHSPFIFR	CTRL3	D:\AmpK_Pass2\AmpKPass3\CTRL3	CTRL3_300ID_ZORBAX_ZED_TT_03Apr2014	2176	13149.9	3	42792	346	1153.86	10.6337
IMVNAALQRQFHSPFIFR	CTRL3	D:\AmpK_Pass2\AmpKPass3\CTRL3	CTRL3_300ID_ZORBAX_ZED_TT_03Apr2014	2176	13149.9	3	42792	183	617.198	10.6016
IMVNAALQRQFHSPFIFR	CTRL2	D:\AmpK_Pass2\AmpKPass3\CTRL2	CTRL2_300ID_ZORBAX_ZED_TT_03Apr2014	2176	8269.86	3	48080	132	487.996	10.5975
IMVNAALQRQFHSPFIFR	CTRL3	D:\AmpK_Pass2\AmpKPass3\CTRL3	CTRL3_300ID_ZORBAX_ZED_TT_03Apr2014	2176	13149.9	3	42792	118	483.383	10.5251
IMVNAALQRQFHSPFIFR	CTRL2	D:\AmpK_Pass2\AmpKPass3\CTRL2	CTRL2_300ID_ZORBAX_ZED_TT_03Apr2014	2176	8269.86	3	48080	287	855.635	10.5209
IMVNAALQRQFHSPFIFR	CTRL3	D:\AmpK_Pass2\AmpKPass3\CTRL3	CTRL3_300ID_ZORBAX_ZED_TT_03Apr2014	2176	13149.9	3	42792	290	914.397	10.3654
IMVNAALQRQFHSPFIFR	CTRL3	D:\AmpK_Pass2\AmpKPass3\CTRL3	CTRL3_300ID_ZORBAX_ZED_TT_03Apr2014	2176	13149.9	3	42792	111	473.127	10.3334
IMVNAALQRQFHSPFIFR	CTRL3	D:\AmpK_Pass2\AmpKPass3\CTRL3	CTRL3_300ID_ZORBAX_ZED_TT_03Apr2014	2176	13149.9	3	42792	320	1030.75	10.3189
IMVNAALQRQFHSPFIFR	CTRL2	D:\AmpK_Pass2\AmpKPass3\CTRL2	CTRL2_300ID_ZORBAX_ZED_TT_03Apr2014	2176	8269.86	3	48080	339	1038.82	10.2826
IMVNAALQRQFHSPFIFR	CTRL3	D:\AmpK_Pass2\AmpKPass3\CTRL3	CTRL3_300ID_ZORBAX_ZED_TT_03Apr2014	2176	13149.9	3	42792	238	731.704	10.2344
IMVNAALQRQFHSPFIFR	CTRL3	D:\AmpK_Pass2\AmpKPass3\CTRL3	CTRL3_300ID_ZORBAX_ZED_TT_03Apr2014	2176	13149.9	3	42792	200	650.239	10.2257
IMVNAALQRQFHSPFIFR	CTRL3	D:\AmpK_Pass2\AmpKPass3\CTRL3	CTRL3_300ID_ZORBAX_ZED_TT_03Apr2014	2176	13149.9	3	42792	260	809.628	10.2155
IMVNAALQRQFHSPFIFR	CTRL3	D:\AmpK_Pass2\AmpKPass3\CTRL3	CTRL3_300ID_ZORBAX_ZED_TT_03Apr2014	2176	13149.9	3	42792	124	494.822	10.1516
IMVNAALQRQFHSPFIFR	CTRL2	D:\AmpK_Pass2\AmpKPass3\CTRL2	CTRL2_300ID_ZORBAX_ZED_TT_03Apr2014	2176	8269.86	3	48080	216	640.481	10.0921
IMVNAALQRQFHSPFIFR	CTRL3	D:\AmpK_Pass2\AmpKPass3\CTRL3	CTRL3_300ID_ZORBAX_ZED_TT_03Apr2014	2176	13149.9	3	42792	277	862.104	10.0722
IMVNAALQRQFHSPFIFR	CTRL2	D:\AmpK_Pass2\AmpKPass3\CTRL2	CTRL2_300ID_ZORBAX_ZED_TT_03Apr2014	2176	8269.86	3	48080	214	636.735	10.0426
IMVNAALQRQFHSPFIFR	CTRL2	D:\AmpK_Pass2\AmpKPass3\CTRL2	CTRL2_300ID_ZORBAX_ZED_TT_03Apr2014	2176	8269.86	3	48080	290	860.634	9.97917
IMVNAALQRQFHSPFIFR	CTRL3	D:\AmpK_Pass2\AmpKPass3\CTRL3	CTRL3_300ID_ZORBAX_ZED_TT_03Apr2014	2176	13149.9	3	42792	258	800.517	9.97732
IMVNAALQRQFHSPFIFR	CTRL3	D:\AmpK_Pass2\AmpKPass3\CTRL3	CTRL3_300ID_ZORBAX_ZED_TT_03Apr2014	2176	13149.9	3	42792	78	406.851	9.97722
IMVNAALQRQFHSPFIFR	CTRL2	D:\AmpK_Pass2\AmpKPass3\CTRL2	CTRL2_300ID_ZORBAX_ZED_TT_03Apr2014	2176	8269.86	3	48080	182	577.594	9.95981
IMVNAALQRQFHSPFIFR	CTRL2	D:\AmpK_Pass2\AmpKPass3\CTRL2	CTRL2_300ID_ZORBAX_ZED_TT_03Apr2014	2176	8269.86	3	48080	16	267.309	9.93687
IMVNAALQRQFHSPFIFR	CTRL2	D:\AmpK_Pass2\AmpKPass3\CTRL2	CTRL2_300ID_ZORBAX_ZED_TT_03Apr2014	2176	8269.86	3	48080	10	243.285	9.93164
IMVNAALQRQFHSPFIFR	CTRL2	D:\AmpK_Pass2\AmpKPass3\CTRL2	CTRL2_300ID_ZORBAX_ZED_TT_03Apr2014	2176	8269.86	3	48080	231	662.267	9.89221
IMVNAALQRQFHSPFIFR	CTRL2	D:\AmpK_Pass2\AmpKPass3\CTRL2	CTRL2_300ID_ZORBAX_ZED_TT_03Apr2014	2176	8269.86	3	48080	190	592.069	9.88872
IMVNAALQRQFHSPFIFR	CTRL2	D:\AmpK_Pass2\AmpKPass3\CTRL2	CTRL2_300ID_ZORBAX_ZED_TT_03Apr2014	2176	8269.86	3	48080	249	686.692	9.87558
IMVNAALQRQFHSPFIFR	CTRL3	D:\AmpK_Pass2\AmpKPass3\CTRL3	CTRL3_300ID_ZORBAX_ZED_TT_03Apr2014	2176	13149.9	3	42792	195	640.696	9.85382
IMVNAALQRQFHSPFIFR	CTRL2	D:\AmpK_Pass2\AmpKPass3\CTRL2	CTRL2_300ID_ZORBAX_ZED_TT_03Apr2014	2176	8269.86	3	48080	353	1093.84	9.84995
IMVNAALQRQFHSPFIFR	CTRL2	D:\AmpK_Pass2\AmpKPass3\CTRL2	CTRL2_300ID_ZORBAX_ZED_TT_03Apr2014	2176	8269.86	3	48080	322	970.763	9.82879
IMVNAALQRQFHSPFIFR	CTRL2	D:\AmpK_Pass2\AmpKPass3\CTRL2	CTRL2_300ID_ZORBAX_ZED_TT_03Apr2014	2176	8269.86	3	48080	315	949.295	9.81286
IMVNAALQRQFHSPFIFR	CTRL2	D:\AmpK_Pass2\AmpKPass3\CTRL2	CTRL2_300ID_ZORBAX_ZED_TT_03Apr2014	2176	8269.86	3	48080	35	311.374	9.79711
IMVNAALQRQFHSPFIFR	CTRL2	D:\AmpK_Pass2\AmpKPass3\CTRL2	CTRL2_300ID_ZORBAX_ZED_TT_03Apr2014	2176	8269.86	3	48080	197	605.701	9.74619
IMVNAALQRQFHSPFIFR	CTRL3	D:\AmpK_Pass2\AmpKPass3\CTRL3	CTRL3_300ID_ZORBAX_ZED_TT_03Apr2014	2176	13149.9	3	42792	184	618.493	9.68066
IMVNAALQRQFHSPFIFR	CTRL3	D:\AmpK_Pass2\AmpKPass3\CTRL3	CTRL3_300ID_ZORBAX_ZED_TT_03Apr2014	2176	13149.9	3	42792	267	826.702	9.61691
IMVNAALQRQFHSPFIFR	CTRL3	D:\AmpK_Pass2\AmpKPass3\CTRL3	CTRL3_300ID_ZORBAX_ZED_TT_03Apr2014	2176	13149.9	3	42792	99	447.345	9.57748
IMVNAALQRQFHSPFIFR	CTRL3	D:\AmpK_Pass2\AmpKPass3\CTRL3	CTRL3_300ID_ZORBAX_ZED_TT_03Apr2014	2176	13149.9	3	42792	82	415.179	9.57587
IMVNAALQRQFHSPFIFR	CTRL3	D:\AmpK_Pass2\AmpKPass3\CTRL3	CTRL3_300ID_ZORBAX_ZED_TT_03Apr2014	2176	13149.9	3	42792	42	326.285	9.56748
IMVNAALQRQFHSPFIFR	CTRL2	D:\AmpK_Pass2\AmpKPass3\CTRL2	CTRL2_300ID_ZORBAX_ZED_TT_03Apr2014	2176	8269.86	3	48080	233	664.432	9.56304
IMVNAALQRQFHSPFIFR	CTRL2	D:\AmpK_Pass2\AmpKPass3\CTRL2	CTRL2_300ID_ZORBAX_ZED_TT_03Apr2014	2176	8269.86	3	48080	8	230.513	9.48218
IMVNAALQRQFHSPFIFR	CTRL2	D:\AmpK_Pass2\AmpKPass3\CTRL2	CTRL2_300ID_ZORBAX_ZED_TT_03Apr2014	2176	8269.86	3	48080	109	452.335	9.44504
IMVNAALQRQFHSPFIFR	CTRL2	D:\AmpK_Pass2\AmpKPass3\CTRL2	CTRL2_300ID_ZORBAX_ZED_TT_03Apr2014	2176	8269.86	3	48080	92	428.97	9.41567
IMVNAALQRQFHSPFIFR	CTRL3	D:\AmpK_Pass2\AmpKPass3\CTRL3	CTRL3_300ID_ZORBAX_ZED_TT_03Apr2014	2176	13149.9	3	42792	28	297.208	9.39289
IMVNAALQRQFHSPFIFR	CTRL2	D:\AmpK_Pass2\AmpKPass3\CTRL2	CTRL2_300ID_ZORBAX_ZED_TT_03Apr2014	2176	8269.86	3	48080	89	425.359	9.37648
IMVNAALQRQFHSPFIFR	CTRL3	D:\AmpK_Pass2\AmpKPass3\CTRL3	CTRL3_300ID_ZORBAX_ZED_TT_03Apr2014	2176	13149.9	3	42792	194	638.49	9.3339
IMVNAALQRQFHSPFIFR	CTRL3	D:\AmpK_Pass2\AmpKPass3\CTRL3	CTRL3_300ID_ZORBAX_ZED_TT_03Apr2014	2176	13149.9	3	42792	87	429.237	9.27555
IMVNAALQRQFHSPFIFR	CTRL3	D:\AmpK_Pass2\AmpKPass3\CTRL3	CTRL3_300ID_ZORBAX_ZED_TT_03Apr2014	2176	13149.9	3	42792	308	987.527	9.27379
IMVNAALQRQFHSPFIFR	CTRL3	D:\AmpK_Pass2\AmpKPass3\CTRL3	CTRL3_300ID_ZORBAX_ZED_TT_03Apr2014	2176	13149.9	3	42792	152	555.445	9.24799
IMVNAALQRQFHSPFIFR	CTRL2	D:\AmpK_Pass2\AmpKPass3\CTRL2	CTRL2_300ID_ZORBAX_ZED_TT_03Apr2014	2176	8269.86	3	48080	312	944.006	9.19303
IMVNAALQRQFHSPFIFR	CTRL3	D:\AmpK_Pass2\AmpKPass3\CTRL3	CTRL3_300ID_ZORBAX_ZED_TT_03Apr2014	2176	13149.9	3	42792	306	975.428	9.18162
IMVNAALQRQFHSPFIFR	CTRL2	D:\AmpK_Pass2\AmpKPass3\CTRL2	CTRL2_300ID_ZORBAX_ZED_TT_03Apr2014	2176	8269.86	3	48080	282	829.566	9.11176
IMVNAALQRQFHSPFIFR	CTRL3	D:\AmpK_Pass2\AmpKPass3\CTRL3	CTRL3_300ID_ZORBAX_ZED_TT_03Apr2014	2176	13149.9	3	42792	249	768.481	9.00157
IMVNAALQRQFHSPFIFR	CTRL2	D:\AmpK_Pass2\AmpKPass3\CTRL2	CTRL2_300ID_ZORBAX_ZED_TT_03Apr2014	2176	8269.86	3	48080	154	526.188	8.99052
IMVNAALQRQFHSPFIFR	CTRL3	D:\AmpK_Pass2\AmpKPass3\CTRL3	CTRL3_300ID_ZORBAX_ZED_TT_03Apr2014	2176	13149.9	3	42792	71	394.844	8.97528
IMVNAALQRQFHSPFIFR	CTRL3	D:\AmpK_Pass2\AmpKPass3\CTRL3	CTRL3_300ID_ZORBAX_ZED_TT_03Apr2014	2176	13149.9	3	42792	91	433.394	8.96004
IMVNAALQRQFHSPFIFR	CTRL3	D:\AmpK_Pass2\AmpKPass3\CTRL3	CTRL3_300ID_ZORBAX_ZED_TT_03Apr2014	2176	13149.9	3	42792	127	503.183	8.8952
IMVNAALQRQFHSPFIFR	CTRL3	D:\AmpK_Pass2\AmpKPass3\CTRL3	CTRL3_300ID_ZORBAX_ZED_TT_03Apr2014	2176	13149.9	3	42792	278	863.77	8.85064
IMVNAALQRQFHSPFIFR	CTRL3	D:\AmpK_Pass2\AmpKPass3\CTRL3	CTRL3_300ID_ZORBAX_ZED_TT_03Apr2014	2176	13149.9	3	42792	188	629.438	8.82042
IMVNAALQRQFHSPFIFR	CTRL3	D:\AmpK_Pass2\AmpKPass3\CTRL3	CTRL3_300ID_ZORBAX_ZED_TT_03Apr2014	2176	13149.9	3	42792	243	749.728	8.79361
IMVNAALQRQFHSPFIFR	CTRL2	D:\AmpK_Pass2\AmpKPass3\CTRL2	CTRL2_300ID_ZORBAX_ZED_TT_03Apr2014	2176	8269.86	3	48080	61	371.379	8.76866
IMVNAALQRQFHSPFIFR	CTRL2	D:\AmpK_Pass2\AmpKPass3\CTRL2	CTRL2_300ID_ZORBAX_ZED_TT_03Apr2014	2176	8269.86	3	48080	120	470.542	8.76664
IMVNAALQRQFHSPFIFR	CTRL3	D:\AmpK_Pass2\AmpKPass3\CTRL3	CTRL3_300ID_ZORBAX_ZED_TT_03Apr2014	2176	13149.9	3	42792	154	561.33	8.76009
IMVNAALQRQFHSPFIFR	CTRL3	D:\AmpK_Pass2\AmpKPass3\CTRL3	CTRL3_300ID_ZORBAX_ZED_TT_03Apr2014	2176	13149.9	3	42792	216	678.787	8.68299
IMVNAALQRQFHSPFIFR	CTRL2	D:\AmpK_Pass2\AmpKPass3\CTRL2	CTRL2_300ID_ZORBAX_ZED_TT_03Apr2014	2176	8269.86	3	48080	145	510.554	8.64922
IMVNAALQRQFHSPFIFR	CTRL2	D:\AmpK_Pass2\AmpKPass3\CTRL2	CTRL2_300ID_ZORBAX_ZED_TT_03Apr2014	2176	8269.86	3	48080	366	1153.8	8.64087
IMVNAALQRQFHSPFIFR	CTRL2	D:\AmpK_Pass2\AmpKPass3\CTRL2	CTRL2_300ID_ZORBAX_ZED_TT_03Apr2014	2176	8269.86	3	48080	165	547.463	8.62467
IMVNAALQRQFHSPFIFR	CTRL2	D:\AmpK_Pass2\AmpKPass3\CTRL2	CTRL2_300ID_ZORBAX_ZED_TT_03Apr2014	2176	8269.86	3	48080	223	649.611	8.58045
IMVNAALQRQFHSPFIFR	CTRL2	D:\AmpK_Pass2\AmpKPass3\CTRL2	CTRL2_300ID_ZORBAX_ZED_TT_03Apr2014	2176	8269.86	3	48080	253	691.209	8.51062
IMVNAALQRQFHSPFIFR	CTRL3	D:\AmpK_Pass2\AmpKPass3\CTRL3	CTRL3_300ID_ZORBAX_ZED_TT_03Apr2014	2176	13149.9	3	42792	174	596.797	8.50611
IMVNAALQRQFHSPFIFR	CTRL2	D:\AmpK_Pass2\AmpKPass3\CTRL2	CTRL2_300ID_ZORBAX_ZED_TT_03Apr2014	2176	8269.86	3	48080	164	546.776	8.50214
IMVNAALQRQFHSPFIFR	CTRL3	D:\AmpK_Pass2\AmpKPass3\CTRL3	CTRL3_300ID_ZORBAX_ZED_TT_03Apr2014	2176	13149.9	3	42792	197	644.601	8.49157
IMVNAALQRQFHSPFIFR	CTRL2	D:\AmpK_Pass2\AmpKPass3\CTRL2	CTRL2_300ID_ZORBAX_ZED_TT_03Apr2014	2176	8269.86	3	48080	348	1075.39	8.44499
IMVNAALQRQFHSPFIFR	CTRL3	D:\AmpK_Pass2\AmpKPass3\CTRL3	CTRL3_300ID_ZORBAX_ZED_TT_03Apr2014	2176	13149.9	3	42792	139	529.336	8.35391
IMVNAALQRQFHSPFIFR	CTRL3	D:\AmpK_Pass2\AmpKPass3\CTRL3	CTRL3_300ID_ZORBAX_ZED_TT_03Apr2014	2176	13149.9	3	42792	217	679.572	8.31914
IMVNAALQRQFHSPFIFR	CTRL2	D:\AmpK_Pass2\AmpKPass3\CTRL2	CTRL2_300ID_ZORBAX_ZED_TT_03Apr2014	2176	8269.86	3	48080	236	666.882	8.31908
IMVNAALQRQFHSPFIFR	CTRL2	D:\AmpK_Pass2\AmpKPass3\CTRL2	CTRL2_300ID_ZORBAX_ZED_TT_03Apr2014	2176	8269.86	3	48080	212	634.497	8.28731
IMVNAALQRQFHSPFIFR	CTRL3	D:\AmpK_Pass2\AmpKPass3\CTRL3	CTRL3_300ID_ZORBAX_ZED_TT_03Apr2014	2176	13149.9	3	42792	80	411.794	8.25764
IMVNAALQRQFHSPFIFR	CTRL3	D:\AmpK_Pass2\AmpKPass3\CTRL3	CTRL3_300ID_ZORBAX_ZED_TT_03Apr2014	2176	13149.9	3	42792	95	442.261	8.2399
IMVNAALQRQFHSPFIFR	CTRL2	D:\AmpK_Pass2\AmpKPass3\CTRL2	CTRL2_300ID_ZORBAX_ZED_TT_03Apr2014	2176	8269.86	3	48080	126	477.904	8.23286
IMVNAALQRQFHSPFIFR	CTRL3	D:\AmpK_Pass2\AmpKPass3\CTRL3	CTRL3_300ID_ZORBAX_ZED_TT_03Apr2014	2176	13149.9	3	42792	310	990.082	8.1133
IMVNAALQRQFHSPFIFR	CTRL2	D:\AmpK_Pass2\AmpKPass3\CTRL2	CTRL2_300ID_ZORBAX_ZED_TT_03Apr2014	2176	8269.86	3	48080	37	317.75	8.10717
IMVNAALQRQFHSPFIFR	CTRL3	D:\AmpK_Pass2\AmpKPass3\CTRL3	CTRL3_300ID_ZORBAX_ZED_TT_03Apr2014	2176	13149.9	3	42792	47	339.66	8.05411
IMVNAALQRQFHSPFIFR	CTRL2	D:\AmpK_Pass2\AmpKPass3\CTRL2	CTRL2_300ID_ZORBAX_ZED_TT_03Apr2014	2176	8269.86	3	48080	347	1065.21	7.97278
IMVNAALQRQFHSPFIFR	CTRL2	D:\AmpK_Pass2\AmpKPass3\CTRL2	CTRL2_300ID_ZORBAX_ZED_TT_03Apr2014	2176	8269.86	3	48080	184	579.708	7.95732
IMVNAALQRQFHSPFIFR	CTRL2	D:\AmpK_Pass2\AmpKPass3\CTRL2	CTRL2_300ID_ZORBAX_ZED_TT_03Apr2014	2176	8269.86	3	48080	21	274.76	7.89739
IMVNAALQRQFHSPFIFR	CTRL3	D:\AmpK_Pass2\AmpKPass3\CTRL3	CTRL3_300ID_ZORBAX_ZED_TT_03Apr2014	2176	13149.9	3	42792	63	380.351	7.87319
IMVNAALQRQFHSPFIFR	CTRL2	D:\AmpK_Pass2\AmpKPass3\CTRL2	CTRL2_300ID_ZORBAX_ZED_TT_03Apr2014	2176	8269.86	3	48080	66	383.926	7.85361
IMVNAALQRQFHSPFIFR	CTRL2	D:\AmpK_Pass2\AmpKPass3\CTRL2	CTRL2_300ID_ZORBAX_ZED_TT_03Apr2014	2176	8269.86	3	48080	228	657.613	7.83144
IMVNAALQRQFHSPFIFR	CTRL2	D:\AmpK_Pass2\AmpKPass3\CTRL2	CTRL2_300ID_ZORBAX_ZED_TT_03Apr2014	2176	8269.86	3	48080	34	310.288	7.82632
IMVNAALQRQFHSPFIFR	CTRL2	D:\AmpK_Pass2\AmpKPass3\CTRL2	CTRL2_300ID_ZORBAX_ZED_TT_03Apr2014	2176	8269.86	3	48080	199	607.625	7.82412
IMVNAALQRQFHSPFIFR	CTRL3	D:\AmpK_Pass2\AmpKPass3\CTRL3	CTRL3_300ID_ZORBAX_ZED_TT_03Apr2014	2176	13149.9	3	42792	153	559.393	7.80878
IMVNAALQRQFHSPFIFR	CTRL3	D:\AmpK_Pass2\AmpKPass3\CTRL3	CTRL3_300ID_ZORBAX_ZED_TT_03Apr2014	2176	13149.9	3	42792	155	562.385	7.78944
IMVNAALQRQFHSPFIFR	CTRL3	D:\AmpK_Pass2\AmpKPass3\CTRL3	CTRL3_300ID_ZORBAX_ZED_TT_03Apr2014	2176	13149.9	3	42792	337	1095.1	7.78445
IMVNAALQRQFHSPFIFR	CTRL3	D:\AmpK_Pass2\AmpKPass3\CTRL3	CTRL3_300ID_ZORBAX_ZED_TT_03Apr2014	2176	13149.9	3	42792	161	573.418	7.75462
IMVNAALQRQFHSPFIFR	CTRL3	D:\AmpK_Pass2\AmpKPass3\CTRL3	CTRL3_300ID_ZORBAX_ZED_TT_03Apr2014	2176	13149.9	3	42792	73	398.441	7.74075
IMVNAALQRQFHSPFIFR	CTRL3	D:\AmpK_Pass2\AmpKPass3\CTRL3	CTRL3_300ID_ZORBAX_ZED_TT_03Apr2014	2176	13149.9	3	42792	81	413.938	7.73472
IMVNAALQRQFHSPFIFR	CTRL2	D:\AmpK_Pass2\AmpKPass3\CTRL2	CTRL2_300ID_ZORBAX_ZED_TT_03Apr2014	2176	8269.86	3	48080	114	458.6	7.73226
IMVNAALQRQFHSPFIFR	CTRL2	D:\AmpK_Pass2\AmpKPass3\CTRL2	CTRL2_300ID_ZORBAX_ZED_TT_03Apr2014	2176	8269.86	3	48080	226	652.572	7.7101
IMVNAALQRQFHSPFIFR	CTRL2	D:\AmpK_Pass2\AmpKPass3\CTRL2	CTRL2_300ID_ZORBAX_ZED_TT_03Apr2014	2176	8269.86	3	48080	294	873.842	7.69998
IMVNAALQRQFHSPFIFR	CTRL3	D:\AmpK_Pass2\AmpKPass3\CTRL3	CTRL3_300ID_ZORBAX_ZED_TT_03Apr2014	2176	13149.9	3	42792	30	300.251	7.64126
IMVNAALQRQFHSPFIFR	CTRL2	D:\AmpK_Pass2\AmpKPass3\CTRL2	CTRL2_300ID_ZORBAX_ZED_TT_03Apr2014	2176	8269.86	3	48080	198	607.014	7.58562
IMVNAALQRQFHSPFIFR	CTRL2	D:\AmpK_Pass2\AmpKPass3\CTRL2	CTRL2_300ID_ZORBAX_ZED_TT_03Apr2014	2176	8269.86	3	48080	50	344.266	7.56397
IMVNAALQRQFHSPFIFR	CTRL2	D:\AmpK_Pass2\AmpKPass3\CTRL2	CTRL2_300ID_ZORBAX_ZED_TT_03Apr2014	2176	8269.86	3	48080	330	993.686	7.52021
IMVNAALQRQFHSPFIFR	CTRL3	D:\AmpK_Pass2\AmpKPass3\CTRL3	CTRL3_300ID_ZORBAX_ZED_TT_03Apr2014	2176	13149.9	3	42792	6	223.284	7.51331
IMVNAALQRQFHSPFIFR	CTRL2	D:\AmpK_Pass2\AmpKPass3\CTRL2	CTRL2_300ID_ZORBAX_ZED_TT_03Apr2014	2176	8269.86	3	48080	160	538.207	7.47045
IMVNAALQRQFHSPFIFR	CTRL3	D:\AmpK_Pass2\AmpKPass3\CTRL3	CTRL3_300ID_ZORBAX_ZED_TT_03Apr2014	2176	13149.9	3	42792	97	445.011	7.47014
IMVNAALQRQFHSPFIFR	CTRL3	D:\AmpK_Pass2\AmpKPass3\CTRL3	CTRL3_300ID_ZORBAX_ZED_TT_03Apr2014	2176	13149.9	3	42792	40	321.272	7.45437
IMVNAALQRQFHSPFIFR	CTRL3	D:\AmpK_Pass2\AmpKPass3\CTRL3	CTRL3_300ID_ZORBAX_ZED_TT_03Apr2014	2176	13149.9	3	42792	254	786.572	7.43557
IMVNAALQRQFHSPFIFR	CTRL3	D:\AmpK_Pass2\AmpKPass3\CTRL3	CTRL3_300ID_ZORBAX_ZED_TT_03Apr2014	2176	13149.9	3	42792	57	366.441	7.31849
IMVNAALQRQFHSPFIFR	CTRL3	D:\AmpK_Pass2\AmpKPass3\CTRL3	CTRL3_300ID_ZORBAX_ZED_TT_03Apr2014	2176	13149.9	3	42792	160	569.993	7.31424
IMVNAALQRQFHSPFIFR	CTRL3	D:\AmpK_Pass2\AmpKPass3\CTRL3	CTRL3_300ID_ZORBAX_ZED_TT_03Apr2014	2176	13149.9	3	42792	90	432.212	7.29057
IMVNAALQRQFHSPFIFR	CTRL2	D:\AmpK_Pass2\AmpKPass3\CTRL2	CTRL2_300ID_ZORBAX_ZED_TT_03Apr2014	2176	8269.86	3	48080	341	1045.64	7.2819
IMVNAALQRQFHSPFIFR	CTRL2	D:\AmpK_Pass2\AmpKPass3\CTRL2	CTRL2_300ID_ZORBAX_ZED_TT_03Apr2014	2176	8269.86	3	48080	156	528.889	7.21146
IMVNAALQRQFHSPFIFR	CTRL2	D:\AmpK_Pass2\AmpKPass3\CTRL2	CTRL2_300ID_ZORBAX_ZED_TT_03Apr2014	2176	8269.86	3	48080	352	1092.7	7.20541
IMVNAALQRQFHSPFIFR	CTRL2	D:\AmpK_Pass2\AmpKPass3\CTRL2	CTRL2_300ID_ZORBAX_ZED_TT_03Apr2014	2176	8269.86	3	48080	147	515.77	7.12936
IMVNAALQRQFHSPFIFR	CTRL2	D:\AmpK_Pass2\AmpKPass3\CTRL2	CTRL2_300ID_ZORBAX_ZED_TT_03Apr2014	2176	8269.86	3	48080	246	681.4	7.11348
IMVNAALQRQFHSPFIFR	CTRL3	D:\AmpK_Pass2\AmpKPass3\CTRL3	CTRL3_300ID_ZORBAX_ZED_TT_03Apr2014	2176	13149.9	3	42792	10	238.35	7.10456
IMVNAALQRQFHSPFIFR	CTRL2	D:\AmpK_Pass2\AmpKPass3\CTRL2	CTRL2_300ID_ZORBAX_ZED_TT_03Apr2014	2176	8269.86	3	48080	186	583.427	7.09767
IMVNAALQRQFHSPFIFR	CTRL3	D:\AmpK_Pass2\AmpKPass3\CTRL3	CTRL3_300ID_ZORBAX_ZED_TT_03Apr2014	2176	13149.9	3	42792	77	405.913	7.08894
IMVNAALQRQFHSPFIFR	CTRL3	D:\AmpK_Pass2\AmpKPass3\CTRL3	CTRL3_300ID_ZORBAX_ZED_TT_03Apr2014	2176	13149.9	3	42792	203	653.14	7.00898
IMVNAALQRQFHSPFIFR	CTRL3	D:\AmpK_Pass2\AmpKPass3\CTRL3	CTRL3_300ID_ZORBAX_ZED_TT_03Apr2014	2176	13149.9	3	42792	363	1404.63	7.0047
IMVNAALQRQFHSPFIFR	CTRL2	D:\AmpK_Pass2\AmpKPass3\CTRL2	CTRL2_300ID_ZORBAX_ZED_TT_03Apr2014	2176	8269.86	3	48080	31	300.293	6.99719
IMVNAALQRQFHSPFIFR	CTRL2	D:\AmpK_Pass2\AmpKPass3\CTRL2	CTRL2_300ID_ZORBAX_ZED_TT_03Apr2014	2176	8269.86	3	48080	369	1170.82	6.99286
IMVNAALQRQFHSPFIFR	CTRL3	D:\AmpK_Pass2\AmpKPass3\CTRL3	CTRL3_300ID_ZORBAX_ZED_TT_03Apr2014	2176	13149.9	3	42792	75	400.287	6.98869
IMVNAALQRQFHSPFIFR	CTRL2	D:\AmpK_Pass2\AmpKPass3\CTRL2	CTRL2_300ID_ZORBAX_ZED_TT_03Apr2014	2176	8269.86	3	48080	119	469.288	6.98801
IMVNAALQRQFHSPFIFR	CTRL3	D:\AmpK_Pass2\AmpKPass3\CTRL3	CTRL3_300ID_ZORBAX_ZED_TT_03Apr2014	2176	13149.9	3	42792	105	464.477	6.98583
IMVNAALQRQFHSPFIFR	CTRL3	D:\AmpK_Pass2\AmpKPass3\CTRL3	CTRL3_300ID_ZORBAX_ZED_TT_03Apr2014	2176	13149.9	3	42792	248	767.5	6.98103
IMVNAALQRQFHSPFIFR	CTRL3	D:\AmpK_Pass2\AmpKPass3\CTRL3	CTRL3_300ID_ZORBAX_ZED_TT_03Apr2014	2176	13149.9	3	42792	241	741.413	6.97557
IMVNAALQRQFHSPFIFR	CTRL2	D:\AmpK_Pass2\AmpKPass3\CTRL2	CTRL2_300ID_ZORBAX_ZED_TT_03Apr2014	2176	8269.86	3	48080	388	1407.01	6.9509
IMVNAALQRQFHSPFIFR	CTRL2	D:\AmpK_Pass2\AmpKPass3\CTRL2	CTRL2_300ID_ZORBAX_ZED_TT_03Apr2014	2176	8269.86	3	48080	308	925.763	6.83441
IMVNAALQRQFHSPFIFR	CTRL3	D:\AmpK_Pass2\AmpKPass3\CTRL3	CTRL3_300ID_ZORBAX_ZED_TT_03Apr2014	2176	13149.9	3	42792	101	449.198	6.81984
IMVNAALQRQFHSPFIFR	CTRL3	D:\AmpK_Pass2\AmpKPass3\CTRL3	CTRL3_300ID_ZORBAX_ZED_TT_03Apr2014	2176	13149.9	3	42792	207	661.437	6.81738
IMVNAALQRQFHSPFIFR	CTRL2	D:\AmpK_Pass2\AmpKPass3\CTRL2	CTRL2_300ID_ZORBAX_ZED_TT_03Apr2014	2176	8269.86	3	48080	227	654.26	6.80375
IMVNAALQRQFHSPFIFR	CTRL2	D:\AmpK_Pass2\AmpKPass3\CTRL2	CTRL2_300ID_ZORBAX_ZED_TT_03Apr2014	2176	8269.86	3	48080	248	684.609	6.79775
IMVNAALQRQFHSPFIFR	CTRL3	D:\AmpK_Pass2\AmpKPass3\CTRL3	CTRL3_300ID_ZORBAX_ZED_TT_03Apr2014	2176	13149.9	3	42792	239	737.684	6.7704
IMVNAALQRQFHSPFIFR	CTRL2	D:\AmpK_Pass2\AmpKPass3\CTRL2	CTRL2_300ID_ZORBAX_ZED_TT_03Apr2014	2176	8269.86	3	48080	361	1126.83	6.76917
IMVNAALQRQFHSPFIFR	CTRL3	D:\AmpK_Pass2\AmpKPass3\CTRL3	CTRL3_300ID_ZORBAX_ZED_TT_03Apr2014	2176	13149.9	3	42792	214	673.966	6.75641
IMVNAALQRQFHSPFIFR	CTRL2	D:\AmpK_Pass2\AmpKPass3\CTRL2	CTRL2_300ID_ZORBAX_ZED_TT_03Apr2014	2176	8269.86	3	48080	101	442.454	6.74924
IMVNAALQRQFHSPFIFR	CTRL2	D:\AmpK_Pass2\AmpKPass3\CTRL2	CTRL2_300ID_ZORBAX_ZED_TT_03Apr2014	2176	8269.86	3	48080	344	1050.72	6.73021
IMVNAALQRQFHSPFIFR	CTRL3	D:\AmpK_Pass2\AmpKPass3\CTRL3	CTRL3_300ID_ZORBAX_ZED_TT_03Apr2014	2176	13149.9	3	42792	172	593.182	6.72779
IMVNAALQRQFHSPFIFR	CTRL3	D:\AmpK_Pass2\AmpKPass3\CTRL3	CTRL3_300ID_ZORBAX_ZED_TT_03Apr2014	2176	13149.9	3	42792	1	207.945	6.72591
IMVNAALQRQFHSPFIFR	CTRL3	D:\AmpK_Pass2\AmpKPass3\CTRL3	CTRL3_300ID_ZORBAX_ZED_TT_03Apr2014	2176	13149.9	3	42792	325	1038.12	6.69128
IMVNAALQRQFHSPFIFR	CTRL3	D:\AmpK_Pass2\AmpKPass3\CTRL3	CTRL3_300ID_ZORBAX_ZED_TT_03Apr2014	2176	13149.9	3	42792	218	680.567	6.68574
IMVNAALQRQFHSPFIFR	CTRL3	D:\AmpK_Pass2\AmpKPass3\CTRL3	CTRL3_300ID_ZORBAX_ZED_TT_03Apr2014	2176	13149.9	3	42792	98	446.134	6.66378
IMVNAALQRQFHSPFIFR	CTRL2	D:\AmpK_Pass2\AmpKPass3\CTRL2	CTRL2_300ID_ZORBAX_ZED_TT_03Apr2014	2176	8269.86	3	48080	11	250.531	6.61787
IMVNAALQRQFHSPFIFR	CTRL2	D:\AmpK_Pass2\AmpKPass3\CTRL2	CTRL2_300ID_ZORBAX_ZED_TT_03Apr2014	2176	8269.86	3	48080	207	629.034	6.59186
IMVNAALQRQFHSPFIFR	CTRL2	D:\AmpK_Pass2\AmpKPass3\CTRL2	CTRL2_300ID_ZORBAX_ZED_TT_03Apr2014	2176	8269.86	3	48080	328	990.937	6.56266
IMVNAALQRQFHSPFIFR	CTRL2	D:\AmpK_Pass2\AmpKPass3\CTRL2	CTRL2_300ID_ZORBAX_ZED_TT_03Apr2014	2176	8269.86	3	48080	235	666.127	6.49169
IMVNAALQRQFHSPFIFR	CTRL2	D:\AmpK_Pass2\AmpKPass3\CTRL2	CTRL2_300ID_ZORBAX_ZED_TT_03Apr2014	2176	8269.86	3	48080	15	266.242	6.4641
IMVNAALQRQFHSPFIFR	CTRL2	D:\AmpK_Pass2\AmpKPass3\CTRL2	CTRL2_300ID_ZORBAX_ZED_TT_03Apr2014	2176	8269.86	3	48080	82	414.39	6.38678
IMVNAALQRQFHSPFIFR	CTRL2	D:\AmpK_Pass2\AmpKPass3\CTRL2	CTRL2_300ID_ZORBAX_ZED_TT_03Apr2014	2176	8269.86	3	48080	357	1109.32	6.32805
IMVNAALQRQFHSPFIFR	CTRL2	D:\AmpK_Pass2\AmpKPass3\CTRL2	CTRL2_300ID_ZORBAX_ZED_TT_03Apr2014	2176	8269.86	3	48080	79	406.88	6.32393
IMVNAALQRQFHSPFIFR	CTRL2	D:\AmpK_Pass2\AmpKPass3\CTRL2	CTRL2_300ID_ZORBAX_ZED_TT_03Apr2014	2176	8269.86	3	48080	297	887.36	6.31264
IMVNAALQRQFHSPFIFR	CTRL3	D:\AmpK_Pass2\AmpKPass3\CTRL3	CTRL3_300ID_ZORBAX_ZED_TT_03Apr2014	2176	13149.9	3	42792	246	755.771	6.28964
IMVNAALQRQFHSPFIFR	CTRL3	D:\AmpK_Pass2\AmpKPass3\CTRL3	CTRL3_300ID_ZORBAX_ZED_TT_03Apr2014	2176	13149.9	3	42792	168	584.945	6.25391
IMVNAALQRQFHSPFIFR	CTRL3	D:\AmpK_Pass2\AmpKPass3\CTRL3	CTRL3_300ID_ZORBAX_ZED_TT_03Apr2014	2176	13149.9	3	42792	173	595.783	6.25148
IMVNAALQRQFHSPFIFR	CTRL3	D:\AmpK_Pass2\AmpKPass3\CTRL3	CTRL3_300ID_ZORBAX_ZED_TT_03Apr2014	2176	13149.9	3	42792	230	703.73	6.24821
IMVNAALQRQFHSPFIFR	CTRL3	D:\AmpK_Pass2\AmpKPass3\CTRL3	CTRL3_300ID_ZORBAX_ZED_TT_03Apr2014	2176	13149.9	3	42792	36	314.147	6.24328
IMVNAALQRQFHSPFIFR	CTRL2	D:\AmpK_Pass2\AmpKPass3\CTRL2	CTRL2_300ID_ZORBAX_ZED_TT_03Apr2014	2176	8269.86	3	48080	295	882.251	6.23744
IMVNAALQRQFHSPFIFR	CTRL2	D:\AmpK_Pass2\AmpKPass3\CTRL2	CTRL2_300ID_ZORBAX_ZED_TT_03Apr2014	2176	8269.86	3	48080	98	439.409	6.18439
IMVNAALQRQFHSPFIFR	CTRL2	D:\AmpK_Pass2\AmpKPass3\CTRL2	CTRL2_300ID_ZORBAX_ZED_TT_03Apr2014	2176	8269.86	3	48080	43	334.329	6.16636
IMVNAALQRQFHSPFIFR	CTRL3	D:\AmpK_Pass2\AmpKPass3\CTRL3	CTRL3_300ID_ZORBAX_ZED_TT_03Apr2014	2176	13149.9	3	42792	83	419.245	6.16635
IMVNAALQRQFHSPFIFR	CTRL2	D:\AmpK_Pass2\AmpKPass3\CTRL2	CTRL2_300ID_ZORBAX_ZED_TT_03Apr2014	2176	8269.86	3	48080	45	336.134	6.14441
IMVNAALQRQFHSPFIFR	CTRL2	D:\AmpK_Pass2\AmpKPass3\CTRL2	CTRL2_300ID_ZORBAX_ZED_TT_03Apr2014	2176	8269.86	3	48080	390	1412.88	6.13726
IMVNAALQRQFHSPFIFR	CTRL2	D:\AmpK_Pass2\AmpKPass3\CTRL2	CTRL2_300ID_ZORBAX_ZED_TT_03Apr2014	2176	8269.86	3	48080	280	817.412	6.12078
IMVNAALQRQFHSPFIFR	CTRL3	D:\AmpK_Pass2\AmpKPass3\CTRL3	CTRL3_300ID_ZORBAX_ZED_TT_03Apr2014	2176	13149.9	3	42792	212	667.514	6.08601
IMVNAALQRQFHSPFIFR	CTRL3	D:\AmpK_Pass2\AmpKPass3\CTRL3	CTRL3_300ID_ZORBAX_ZED_TT_03Apr2014	2176	13149.9	3	42792	121	487.235	6.07841
IMVNAALQRQFHSPFIFR	CTRL2	D:\AmpK_Pass2\AmpKPass3\CTRL2	CTRL2_300ID_ZORBAX_ZED_TT_03Apr2014	2176	8269.86	3	48080	139	502.464	6.07434
IMVNAALQRQFHSPFIFR	CTRL2	D:\AmpK_Pass2\AmpKPass3\CTRL2	CTRL2_300ID_ZORBAX_ZED_TT_03Apr2014	2176	8269.86	3	48080	128	481.291	6.02977
IMVNAALQRQFHSPFIFR	CTRL2	D:\AmpK_Pass2\AmpKPass3\CTRL2	CTRL2_300ID_ZORBAX_ZED_TT_03Apr2014	2176	8269.86	3	48080	1	207.539	6.02699
IMVNAALQRQFHSPFIFR	CTRL3	D:\AmpK_Pass2\AmpKPass3\CTRL3	CTRL3_300ID_ZORBAX_ZED_TT_03Apr2014	2176	13149.9	3	42792	117	481.523	5.9504
IMVNAALQRQFHSPFIFR	CTRL3	D:\AmpK_Pass2\AmpKPass3\CTRL3	CTRL3_300ID_ZORBAX_ZED_TT_03Apr2014	2176	13149.9	3	42792	330	1075.49	5.9432
IMVNAALQRQFHSPFIFR	CTRL3	D:\AmpK_Pass2\AmpKPass3\CTRL3	CTRL3_300ID_ZORBAX_ZED_TT_03Apr2014	2176	13149.9	3	42792	55	361.493	5.936
IMVNAALQRQFHSPFIFR	CTRL2	D:\AmpK_Pass2\AmpKPass3\CTRL2	CTRL2_300ID_ZORBAX_ZED_TT_03Apr2014	2176	8269.86	3	48080	284	842.541	5.9105
IMVNAALQRQFHSPFIFR	CTRL3	D:\AmpK_Pass2\AmpKPass3\CTRL3	CTRL3_300ID_ZORBAX_ZED_TT_03Apr2014	2176	13149.9	3	42792	100	448.394	5.90311
IMVNAALQRQFHSPFIFR	CTRL2	D:\AmpK_Pass2\AmpKPass3\CTRL2	CTRL2_300ID_ZORBAX_ZED_TT_03Apr2014	2176	8269.86	3	48080	203	620.665	5.9026
IMVNAALQRQFHSPFIFR	CTRL3	D:\AmpK_Pass2\AmpKPass3\CTRL3	CTRL3_300ID_ZORBAX_ZED_TT_03Apr2014	2176	13149.9	3	42792	20	271.499	5.79119
IMVNAALQRQFHSPFIFR	CTRL2	D:\AmpK_Pass2\AmpKPass3\CTRL2	CTRL2_300ID_ZORBAX_ZED_TT_03Apr2014	2176	8269.86	3	48080	105	447.515	5.76573
IMVNAALQRQFHSPFIFR	CTRL3	D:\AmpK_Pass2\AmpKPass3\CTRL3	CTRL3_300ID_ZORBAX_ZED_TT_03Apr2014	2176	13149.9	3	42792	41	322.176	5.73865
IMVNAALQRQFHSPFIFR	CTRL2	D:\AmpK_Pass2\AmpKPass3\CTRL2	CTRL2_300ID_ZORBAX_ZED_TT_03Apr2014	2176	8269.86	3	48080	62	372.256	5.71675
IMVNAALQRQFHSPFIFR	CTRL2	D:\AmpK_Pass2\AmpKPass3\CTRL2	CTRL2_300ID_ZORBAX_ZED_TT_03Apr2014	2176	8269.86	3	48080	112	455.788	5.70034
IMVNAALQRQFHSPFIFR	CTRL2	D:\AmpK_Pass2\AmpKPass3\CTRL2	CTRL2_300ID_ZORBAX_ZED_TT_03Apr2014	2176	8269.86	3	48080	173	562.277	5.69527
IMVNAALQRQFHSPFIFR	CTRL2	D:\AmpK_Pass2\AmpKPass3\CTRL2	CTRL2_300ID_ZORBAX_ZED_TT_03Apr2014	2176	8269.86	3	48080	351	1082.98	5.65211
IMVNAALQRQFHSPFIFR	CTRL3	D:\AmpK_Pass2\AmpKPass3\CTRL3	CTRL3_300ID_ZORBAX_ZED_TT_03Apr2014	2176	13149.9	3	42792	301	950.639	5.62206
IMVNAALQRQFHSPFIFR	CTRL3	D:\AmpK_Pass2\AmpKPass3\CTRL3	CTRL3_300ID_ZORBAX_ZED_TT_03Apr2014	2176	13149.9	3	42792	264	814.601	5.61099
IMVNAALQRQFHSPFIFR	CTRL2	D:\AmpK_Pass2\AmpKPass3\CTRL2	CTRL2_300ID_ZORBAX_ZED_TT_03Apr2014	2176	8269.86	3	48080	140	503.287	5.54321
IMVNAALQRQFHSPFIFR	CTRL3	D:\AmpK_Pass2\AmpKPass3\CTRL3	CTRL3_300ID_ZORBAX_ZED_TT_03Apr2014	2176	13149.9	3	42792	287	903.139	5.52077
IMVNAALQRQFHSPFIFR	CTRL3	D:\AmpK_Pass2\AmpKPass3\CTRL3	CTRL3_300ID_ZORBAX_ZED_TT_03Apr2014	2176	13149.9	3	42792	126	501.355	5.49809
IMVNAALQRQFHSPFIFR	CTRL3	D:\AmpK_Pass2\AmpKPass3\CTRL3	CTRL3_300ID_ZORBAX_ZED_TT_03Apr2014	2176	13149.9	3	42792	18	266.231	5.48426
IMVNAALQRQFHSPFIFR	CTRL3	D:\AmpK_Pass2\AmpKPass3\CTRL3	CTRL3_300ID_ZORBAX_ZED_TT_03Apr2014	2176	13149.9	3	42792	109	470.473	5.48177
IMVNAALQRQFHSPFIFR	CTRL3	D:\AmpK_Pass2\AmpKPass3\CTRL3	CTRL3_300ID_ZORBAX_ZED_TT_03Apr2014	2176	13149.9	3	42792	156	563.049	5.47693
IMVNAALQRQFHSPFIFR	CTRL2	D:\AmpK_Pass2\AmpKPass3\CTRL2	CTRL2_300ID_ZORBAX_ZED_TT_03Apr2014	2176	8269.86	3	48080	371	1196.89	5.47407
IMVNAALQRQFHSPFIFR	CTRL3	D:\AmpK_Pass2\AmpKPass3\CTRL3	CTRL3_300ID_ZORBAX_ZED_TT_03Apr2014	2176	13149.9	3	42792	321	1031.52	5.46871
IMVNAALQRQFHSPFIFR	CTRL3	D:\AmpK_Pass2\AmpKPass3\CTRL3	CTRL3_300ID_ZORBAX_ZED_TT_03Apr2014	2176	13149.9	3	42792	186	623.462	5.45793
IMVNAALQRQFHSPFIFR	CTRL3	D:\AmpK_Pass2\AmpKPass3\CTRL3	CTRL3_300ID_ZORBAX_ZED_TT_03Apr2014	2176	13149.9	3	42792	70	388.248	5.45632
IMVNAALQRQFHSPFIFR	CTRL3	D:\AmpK_Pass2\AmpKPass3\CTRL3	CTRL3_300ID_ZORBAX_ZED_TT_03Apr2014	2176	13149.9	3	42792	147	548.452	5.44326
IMVNAALQRQFHSPFIFR	CTRL3	D:\AmpK_Pass2\AmpKPass3\CTRL3	CTRL3_300ID_ZORBAX_ZED_TT_03Apr2014	2176	13149.9	3	42792	169	589.44	5.39309
IMVNAALQRQFHSPFIFR	CTRL2	D:\AmpK_Pass2\AmpKPass3\CTRL2	CTRL2_300ID_ZORBAX_ZED_TT_03Apr2014	2176	8269.86	3	48080	382	1300.79	5.36404
IMVNAALQRQFHSPFIFR	CTRL3	D:\AmpK_Pass2\AmpKPass3\CTRL3	CTRL3_300ID_ZORBAX_ZED_TT_03Apr2014	2176	13149.9	3	42792	64	381.156	5.35186
IMVNAALQRQFHSPFIFR	CTRL2	D:\AmpK_Pass2\AmpKPass3\CTRL2	CTRL2_300ID_ZORBAX_ZED_TT_03Apr2014	2176	8269.86	3	48080	220	645.476	5.34319
IMVNAALQRQFHSPFIFR	CTRL2	D:\AmpK_Pass2\AmpKPass3\CTRL2	CTRL2_300ID_ZORBAX_ZED_TT_03Apr2014	2176	8269.86	3	48080	193	596.421	5.33387
IMVNAALQRQFHSPFIFR	CTRL2	D:\AmpK_Pass2\AmpKPass3\CTRL2	CTRL2_300ID_ZORBAX_ZED_TT_03Apr2014	2176	8269.86	3	48080	69	387.453	5.32445
IMVNAALQRQFHSPFIFR	CTRL2	D:\AmpK_Pass2\AmpKPass3\CTRL2	CTRL2_300ID_ZORBAX_ZED_TT_03Apr2014	2176	8269.86	3	48080	159	536.998	5.26733
IMVNAALQRQFHSPFIFR	CTRL2	D:\AmpK_Pass2\AmpKPass3\CTRL2	CTRL2_300ID_ZORBAX_ZED_TT_03Apr2014	2176	8269.86	3	48080	167	550.69	5.2656
IMVNAALQRQFHSPFIFR	CTRL2	D:\AmpK_Pass2\AmpKPass3\CTRL2	CTRL2_300ID_ZORBAX_ZED_TT_03Apr2014	2176	8269.86	3	48080	285	845.661	5.22909
IMVNAALQRQFHSPFIFR	CTRL2	D:\AmpK_Pass2\AmpKPass3\CTRL2	CTRL2_300ID_ZORBAX_ZED_TT_03Apr2014	2176	8269.86	3	48080	237	667.647	5.20495
IMVNAALQRQFHSPFIFR	CTRL3	D:\AmpK_Pass2\AmpKPass3\CTRL3	CTRL3_300ID_ZORBAX_ZED_TT_03Apr2014	2176	13149.9	3	42792	294	930.875	5.18034
IMVNAALQRQFHSPFIFR	CTRL3	D:\AmpK_Pass2\AmpKPass3\CTRL3	CTRL3_300ID_ZORBAX_ZED_TT_03Apr2014	2176	13149.9	3	42792	313	994.943	5.17992
IMVNAALQRQFHSPFIFR	CTRL2	D:\AmpK_Pass2\AmpKPass3\CTRL2	CTRL2_300ID_ZORBAX_ZED_TT_03Apr2014	2176	8269.86	3	48080	205	625.762	5.17327
IMVNAALQRQFHSPFIFR	CTRL3	D:\AmpK_Pass2\AmpKPass3\CTRL3	CTRL3_300ID_ZORBAX_ZED_TT_03Apr2014	2176	13149.9	3	42792	180	608.427	5.14814
IMVNAALQRQFHSPFIFR	CTRL2	D:\AmpK_Pass2\AmpKPass3\CTRL2	CTRL2_300ID_ZORBAX_ZED_TT_03Apr2014	2176	8269.86	3	48080	301	900.897	5.05386
IMVNAALQRQFHSPFIFR	CTRL2	D:\AmpK_Pass2\AmpKPass3\CTRL2	CTRL2_300ID_ZORBAX_ZED_TT_03Apr2014	2176	8269.86	3	48080	81	413.253	5.04684
IMVNAALQRQFHSPFIFR	CTRL3	D:\AmpK_Pass2\AmpKPass3\CTRL3	CTRL3_300ID_ZORBAX_ZED_TT_03Apr2014	2176	13149.9	3	42792	359	1285.81	5.02559
IMVNAALQRQFHSPFIFR	CTRL3	D:\AmpK_Pass2\AmpKPass3\CTRL3	CTRL3_300ID_ZORBAX_ZED_TT_03Apr2014	2176	13149.9	3	42792	35	312.379	5.02538
IMVNAALQRQFHSPFIFR	CTRL3	D:\AmpK_Pass2\AmpKPass3\CTRL3	CTRL3_300ID_ZORBAX_ZED_TT_03Apr2014	2176	13149.9	3	42792	204	655.471	5.02303
IMVNAALQRQFHSPFIFR	CTRL3	D:\AmpK_Pass2\AmpKPass3\CTRL3	CTRL3_300ID_ZORBAX_ZED_TT_03Apr2014	2176	13149.9	3	42792	88	430.302	5.0206
IMVNAALQRQFHSPFIFR	CTRL2	D:\AmpK_Pass2\AmpKPass3\CTRL2	CTRL2_300ID_ZORBAX_ZED_TT_03Apr2014	2176	8269.86	3	48080	222	647.316	5.01411
IMVNAALQRQFHSPFIFR	CTRL3	D:\AmpK_Pass2\AmpKPass3\CTRL3	CTRL3_300ID_ZORBAX_ZED_TT_03Apr2014	2176	13149.9	3	42792	224	691.717	5.01052
IMVNAALQRQFHSPFIFR	CTRL3	D:\AmpK_Pass2\AmpKPass3\CTRL3	CTRL3_300ID_ZORBAX_ZED_TT_03Apr2014	2176	13149.9	3	42792	133	513.448	4.99597
IMVNAALQRQFHSPFIFR	CTRL3	D:\AmpK_Pass2\AmpKPass3\CTRL3	CTRL3_300ID_ZORBAX_ZED_TT_03Apr2014	2176	13149.9	3	42792	185	619.491	4.99549
IMVNAALQRQFHSPFIFR	CTRL3	D:\AmpK_Pass2\AmpKPass3\CTRL3	CTRL3_300ID_ZORBAX_ZED_TT_03Apr2014	2176	13149.9	3	42792	296	944.62	4.98489
IMVNAALQRQFHSPFIFR	CTRL2	D:\AmpK_Pass2\AmpKPass3\CTRL2	CTRL2_300ID_ZORBAX_ZED_TT_03Apr2014	2176	8269.86	3	48080	219	644.506	4.97996
IMVNAALQRQFHSPFIFR	CTRL3	D:\AmpK_Pass2\AmpKPass3\CTRL3	CTRL3_300ID_ZORBAX_ZED_TT_03Apr2014	2176	13149.9	3	42792	189	631.426	4.91991
IMVNAALQRQFHSPFIFR	CTRL2	D:\AmpK_Pass2\AmpKPass3\CTRL2	CTRL2_300ID_ZORBAX_ZED_TT_03Apr2014	2176	8269.86	3	48080	171	557.288	4.89419
IMVNAALQRQFHSPFIFR	CTRL3	D:\AmpK_Pass2\AmpKPass3\CTRL3	CTRL3_300ID_ZORBAX_ZED_TT_03Apr2014	2176	13149.9	3	42792	298	947.427	4.88379
IMVNAALQRQFHSPFIFR	CTRL3	D:\AmpK_Pass2\AmpKPass3\CTRL3	CTRL3_300ID_ZORBAX_ZED_TT_03Apr2014	2176	13149.9	3	42792	104	459.27	4.87716
IMVNAALQRQFHSPFIFR	CTRL2	D:\AmpK_Pass2\AmpKPass3\CTRL2	CTRL2_300ID_ZORBAX_ZED_TT_03Apr2014	2176	8269.86	3	48080	386	1371.55	4.84523
IMVNAALQRQFHSPFIFR	CTRL2	D:\AmpK_Pass2\AmpKPass3\CTRL2	CTRL2_300ID_ZORBAX_ZED_TT_03Apr2014	2176	8269.86	3	48080	243	676.436	4.83906
IMVNAALQRQFHSPFIFR	CTRL2	D:\AmpK_Pass2\AmpKPass3\CTRL2	CTRL2_300ID_ZORBAX_ZED_TT_03Apr2014	2176	8269.86	3	48080	209	630.837	4.82807
IMVNAALQRQFHSPFIFR	CTRL3	D:\AmpK_Pass2\AmpKPass3\CTRL3	CTRL3_300ID_ZORBAX_ZED_TT_03Apr2014	2176	13149.9	3	42792	60	371.427	4.82516
IMVNAALQRQFHSPFIFR	CTRL2	D:\AmpK_Pass2\AmpKPass3\CTRL2	CTRL2_300ID_ZORBAX_ZED_TT_03Apr2014	2176	8269.86	3	48080	378	1256.93	4.78975
IMVNAALQRQFHSPFIFR	CTRL3	D:\AmpK_Pass2\AmpKPass3\CTRL3	CTRL3_300ID_ZORBAX_ZED_TT_03Apr2014	2176	13149.9	3	42792	54	357.328	4.76354
IMVNAALQRQFHSPFIFR	CTRL3	D:\AmpK_Pass2\AmpKPass3\CTRL3	CTRL3_300ID_ZORBAX_ZED_TT_03Apr2014	2176	13149.9	3	42792	256	794.769	4.73759
IMVNAALQRQFHSPFIFR	CTRL3	D:\AmpK_Pass2\AmpKPass3\CTRL3	CTRL3_300ID_ZORBAX_ZED_TT_03Apr2014	2176	13149.9	3	42792	187	627.281	4.69779
IMVNAALQRQFHSPFIFR	CTRL2	D:\AmpK_Pass2\AmpKPass3\CTRL2	CTRL2_300ID_ZORBAX_ZED_TT_03Apr2014	2176	8269.86	3	48080	49	342.312	4.69375
IMVNAALQRQFHSPFIFR	CTRL2	D:\AmpK_Pass2\AmpKPass3\CTRL2	CTRL2_300ID_ZORBAX_ZED_TT_03Apr2014	2176	8269.86	3	48080	108	451.546	4.63892
IMVNAALQRQFHSPFIFR	CTRL3	D:\AmpK_Pass2\AmpKPass3\CTRL3	CTRL3_300ID_ZORBAX_ZED_TT_03Apr2014	2176	13149.9	3	42792	329	1050.76	4.57494
IMVNAALQRQFHSPFIFR	CTRL3	D:\AmpK_Pass2\AmpKPass3\CTRL3	CTRL3_300ID_ZORBAX_ZED_TT_03Apr2014	2176	13149.9	3	42792	26	291.314	4.56679
IMVNAALQRQFHSPFIFR	CTRL3	D:\AmpK_Pass2\AmpKPass3\CTRL3	CTRL3_300ID_ZORBAX_ZED_TT_03Apr2014	2176	13149.9	3	42792	276	861.055	4.56448
IMVNAALQRQFHSPFIFR	CTRL2	D:\AmpK_Pass2\AmpKPass3\CTRL2	CTRL2_300ID_ZORBAX_ZED_TT_03Apr2014	2176	8269.86	3	48080	153	524.814	4.54448
IMVNAALQRQFHSPFIFR	CTRL2	D:\AmpK_Pass2\AmpKPass3\CTRL2	CTRL2_300ID_ZORBAX_ZED_TT_03Apr2014	2176	8269.86	3	48080	239	670.987	4.53583
IMVNAALQRQFHSPFIFR	CTRL2	D:\AmpK_Pass2\AmpKPass3\CTRL2	CTRL2_300ID_ZORBAX_ZED_TT_03Apr2014	2176	8269.86	3	48080	221	646.48	4.53522
IMVNAALQRQFHSPFIFR	CTRL2	D:\AmpK_Pass2\AmpKPass3\CTRL2	CTRL2_300ID_ZORBAX_ZED_TT_03Apr2014	2176	8269.86	3	48080	271	767.297	4.47302
IMVNAALQRQFHSPFIFR	CTRL2	D:\AmpK_Pass2\AmpKPass3\CTRL2	CTRL2_300ID_ZORBAX_ZED_TT_03Apr2014	2176	8269.86	3	48080	59	369.444	4.4595
IMVNAALQRQFHSPFIFR	CTRL3	D:\AmpK_Pass2\AmpKPass3\CTRL3	CTRL3_300ID_ZORBAX_ZED_TT_03Apr2014	2176	13149.9	3	42792	179	607.189	4.43913
IMVNAALQRQFHSPFIFR	CTRL2	D:\AmpK_Pass2\AmpKPass3\CTRL2	CTRL2_300ID_ZORBAX_ZED_TT_03Apr2014	2176	8269.86	3	48080	180	573.512	4.42696
IMVNAALQRQFHSPFIFR	CTRL3	D:\AmpK_Pass2\AmpKPass3\CTRL3	CTRL3_300ID_ZORBAX_ZED_TT_03Apr2014	2176	13149.9	3	42792	314	1001.7	4.41769
IMVNAALQRQFHSPFIFR	CTRL3	D:\AmpK_Pass2\AmpKPass3\CTRL3	CTRL3_300ID_ZORBAX_ZED_TT_03Apr2014	2176	13149.9	3	42792	29	298.391	4.41692
IMVNAALQRQFHSPFIFR	CTRL3	D:\AmpK_Pass2\AmpKPass3\CTRL3	CTRL3_300ID_ZORBAX_ZED_TT_03Apr2014	2176	13149.9	3	42792	110	471.823	4.41679
IMVNAALQRQFHSPFIFR	CTRL3	D:\AmpK_Pass2\AmpKPass3\CTRL3	CTRL3_300ID_ZORBAX_ZED_TT_03Apr2014	2176	13149.9	3	42792	245	754.599	4.41548
IMVNAALQRQFHSPFIFR	CTRL2	D:\AmpK_Pass2\AmpKPass3\CTRL2	CTRL2_300ID_ZORBAX_ZED_TT_03Apr2014	2176	8269.86	3	48080	152	523.642	4.39107
IMVNAALQRQFHSPFIFR	CTRL2	D:\AmpK_Pass2\AmpKPass3\CTRL2	CTRL2_300ID_ZORBAX_ZED_TT_03Apr2014	2176	8269.86	3	48080	137	497.641	4.3839
IMVNAALQRQFHSPFIFR	CTRL3	D:\AmpK_Pass2\AmpKPass3\CTRL3	CTRL3_300ID_ZORBAX_ZED_TT_03Apr2014	2176	13149.9	3	42792	289	905.765	4.27073
IMVNAALQRQFHSPFIFR	CTRL3	D:\AmpK_Pass2\AmpKPass3\CTRL3	CTRL3_300ID_ZORBAX_ZED_TT_03Apr2014	2176	13149.9	3	42792	8	228.195	4.26399
IMVNAALQRQFHSPFIFR	CTRL2	D:\AmpK_Pass2\AmpKPass3\CTRL2	CTRL2_300ID_ZORBAX_ZED_TT_03Apr2014	2176	8269.86	3	48080	29	298.107	4.24321
IMVNAALQRQFHSPFIFR	CTRL3	D:\AmpK_Pass2\AmpKPass3\CTRL3	CTRL3_300ID_ZORBAX_ZED_TT_03Apr2014	2176	13149.9	3	42792	165	580.522	4.24151
IMVNAALQRQFHSPFIFR	CTRL3	D:\AmpK_Pass2\AmpKPass3\CTRL3	CTRL3_300ID_ZORBAX_ZED_TT_03Apr2014	2176	13149.9	3	42792	300	949.545	4.23724
IMVNAALQRQFHSPFIFR	CTRL2	D:\AmpK_Pass2\AmpKPass3\CTRL2	CTRL2_300ID_ZORBAX_ZED_TT_03Apr2014	2176	8269.86	3	48080	162	542.353	4.23662
IMVNAALQRQFHSPFIFR	CTRL2	D:\AmpK_Pass2\AmpKPass3\CTRL2	CTRL2_300ID_ZORBAX_ZED_TT_03Apr2014	2176	8269.86	3	48080	380	1258.84	4.23489
IMVNAALQRQFHSPFIFR	CTRL2	D:\AmpK_Pass2\AmpKPass3\CTRL2	CTRL2_300ID_ZORBAX_ZED_TT_03Apr2014	2176	8269.86	3	48080	125	476.513	4.21843
IMVNAALQRQFHSPFIFR	CTRL2	D:\AmpK_Pass2\AmpKPass3\CTRL2	CTRL2_300ID_ZORBAX_ZED_TT_03Apr2014	2176	8269.86	3	48080	13	255.232	4.13727
IMVNAALQRQFHSPFIFR	CTRL2	D:\AmpK_Pass2\AmpKPass3\CTRL2	CTRL2_300ID_ZORBAX_ZED_TT_03Apr2014	2176	8269.86	3	48080	370	1195.98	4.1344
IMVNAALQRQFHSPFIFR	CTRL3	D:\AmpK_Pass2\AmpKPass3\CTRL3	CTRL3_300ID_ZORBAX_ZED_TT_03Apr2014	2176	13149.9	3	42792	255	793.363	4.13264
IMVNAALQRQFHSPFIFR	CTRL3	D:\AmpK_Pass2\AmpKPass3\CTRL3	CTRL3_300ID_ZORBAX_ZED_TT_03Apr2014	2176	13149.9	3	42792	302	953.531	4.11427
IMVNAALQRQFHSPFIFR	CTRL3	D:\AmpK_Pass2\AmpKPass3\CTRL3	CTRL3_300ID_ZORBAX_ZED_TT_03Apr2014	2176	13149.9	3	42792	113	475.406	4.11408
IMVNAALQRQFHSPFIFR	CTRL3	D:\AmpK_Pass2\AmpKPass3\CTRL3	CTRL3_300ID_ZORBAX_ZED_TT_03Apr2014	2176	13149.9	3	42792	279	870.952	4.11085
IMVNAALQRQFHSPFIFR	CTRL3	D:\AmpK_Pass2\AmpKPass3\CTRL3	CTRL3_300ID_ZORBAX_ZED_TT_03Apr2014	2176	13149.9	3	42792	157	565.37	4.1086
IMVNAALQRQFHSPFIFR	CTRL2	D:\AmpK_Pass2\AmpKPass3\CTRL2	CTRL2_300ID_ZORBAX_ZED_TT_03Apr2014	2176	8269.86	3	48080	129	483.489	4.08113
IMVNAALQRQFHSPFIFR	CTRL2	D:\AmpK_Pass2\AmpKPass3\CTRL2	CTRL2_300ID_ZORBAX_ZED_TT_03Apr2014	2176	8269.86	3	48080	215	638.394	4.03691
IMVNAALQRQFHSPFIFR	CTRL2	D:\AmpK_Pass2\AmpKPass3\CTRL2	CTRL2_300ID_ZORBAX_ZED_TT_03Apr2014	2176	8269.86	3	48080	56	361.482	4.03034
IMVNAALQRQFHSPFIFR	CTRL2	D:\AmpK_Pass2\AmpKPass3\CTRL2	CTRL2_300ID_ZORBAX_ZED_TT_03Apr2014	2176	8269.86	3	48080	146	512.661	4.02896
IMVNAALQRQFHSPFIFR	CTRL2	D:\AmpK_Pass2\AmpKPass3\CTRL2	CTRL2_300ID_ZORBAX_ZED_TT_03Apr2014	2176	8269.86	3	48080	195	603.333	4.02374
IMVNAALQRQFHSPFIFR	CTRL2	D:\AmpK_Pass2\AmpKPass3\CTRL2	CTRL2_300ID_ZORBAX_ZED_TT_03Apr2014	2176	8269.86	3	48080	320	967.657	4.02305
IMVNAALQRQFHSPFIFR	CTRL3	D:\AmpK_Pass2\AmpKPass3\CTRL3	CTRL3_300ID_ZORBAX_ZED_TT_03Apr2014	2176	13149.9	3	42792	326	1045.15	4.00791
IMVNAALQRQFHSPFIFR	CTRL2	D:\AmpK_Pass2\AmpKPass3\CTRL2	CTRL2_300ID_ZORBAX_ZED_TT_03Apr2014	2176	8269.86	3	48080	372	1201.91	4.00719
IMVNAALQRQFHSPFIFR	CTRL3	D:\AmpK_Pass2\AmpKPass3\CTRL3	CTRL3_300ID_ZORBAX_ZED_TT_03Apr2014	2176	13149.9	3	42792	112	474.333	4.00456
IMVNAALQRQFHSPFIFR	CTRL3	D:\AmpK_Pass2\AmpKPass3\CTRL3	CTRL3_300ID_ZORBAX_ZED_TT_03Apr2014	2176	13149.9	3	42792	106	465.503	3.98763
IMVNAALQRQFHSPFIFR	CTRL3	D:\AmpK_Pass2\AmpKPass3\CTRL3	CTRL3_300ID_ZORBAX_ZED_TT_03Apr2014	2176	13149.9	3	42792	176	601.057	3.96389
IMVNAALQRQFHSPFIFR	CTRL3	D:\AmpK_Pass2\AmpKPass3\CTRL3	CTRL3_300ID_ZORBAX_ZED_TT_03Apr2014	2176	13149.9	3	42792	65	383.104	3.96098
IMVNAALQRQFHSPFIFR	CTRL2	D:\AmpK_Pass2\AmpKPass3\CTRL2	CTRL2_300ID_ZORBAX_ZED_TT_03Apr2014	2176	8269.86	3	48080	88	423.539	3.95462
IMVNAALQRQFHSPFIFR	CTRL2	D:\AmpK_Pass2\AmpKPass3\CTRL2	CTRL2_300ID_ZORBAX_ZED_TT_03Apr2014	2176	8269.86	3	48080	135	494.464	3.94859
IMVNAALQRQFHSPFIFR	CTRL2	D:\AmpK_Pass2\AmpKPass3\CTRL2	CTRL2_300ID_ZORBAX_ZED_TT_03Apr2014	2176	8269.86	3	48080	130	485.08	3.9236
IMVNAALQRQFHSPFIFR	CTRL2	D:\AmpK_Pass2\AmpKPass3\CTRL2	CTRL2_300ID_ZORBAX_ZED_TT_03Apr2014	2176	8269.86	3	48080	102	443.604	3.91805
IMVNAALQRQFHSPFIFR	CTRL2	D:\AmpK_Pass2\AmpKPass3\CTRL2	CTRL2_300ID_ZORBAX_ZED_TT_03Apr2014	2176	8269.86	3	48080	363	1139.75	3.90234
IMVNAALQRQFHSPFIFR	CTRL2	D:\AmpK_Pass2\AmpKPass3\CTRL2	CTRL2_300ID_ZORBAX_ZED_TT_03Apr2014	2176	8269.86	3	48080	325	981.662	3.89717
IMVNAALQRQFHSPFIFR	CTRL2	D:\AmpK_Pass2\AmpKPass3\CTRL2	CTRL2_300ID_ZORBAX_ZED_TT_03Apr2014	2176	8269.86	3	48080	267	738.637	3.84579
IMVNAALQRQFHSPFIFR	CTRL2	D:\AmpK_Pass2\AmpKPass3\CTRL2	CTRL2_300ID_ZORBAX_ZED_TT_03Apr2014	2176	8269.86	3	48080	304	905.198	3.81473
IMVNAALQRQFHSPFIFR	CTRL3	D:\AmpK_Pass2\AmpKPass3\CTRL3	CTRL3_300ID_ZORBAX_ZED_TT_03Apr2014	2176	13149.9	3	42792	262	812.6	3.8096
IMVNAALQRQFHSPFIFR	CTRL2	D:\AmpK_Pass2\AmpKPass3\CTRL2	CTRL2_300ID_ZORBAX_ZED_TT_03Apr2014	2176	8269.86	3	48080	97	438.361	3.80854
IMVNAALQRQFHSPFIFR	CTRL3	D:\AmpK_Pass2\AmpKPass3\CTRL3	CTRL3_300ID_ZORBAX_ZED_TT_03Apr2014	2176	13149.9	3	42792	19	267.435	3.80811
IMVNAALQRQFHSPFIFR	CTRL3	D:\AmpK_Pass2\AmpKPass3\CTRL3	CTRL3_300ID_ZORBAX_ZED_TT_03Apr2014	2176	13149.9	3	42792	265	815.417	3.8075
IMVNAALQRQFHSPFIFR	CTRL3	D:\AmpK_Pass2\AmpKPass3\CTRL3	CTRL3_300ID_ZORBAX_ZED_TT_03Apr2014	2176	13149.9	3	42792	103	458.398	3.80671
IMVNAALQRQFHSPFIFR	CTRL3	D:\AmpK_Pass2\AmpKPass3\CTRL3	CTRL3_300ID_ZORBAX_ZED_TT_03Apr2014	2176	13149.9	3	42792	270	830.356	3.80649
IMVNAALQRQFHSPFIFR	CTRL3	D:\AmpK_Pass2\AmpKPass3\CTRL3	CTRL3_300ID_ZORBAX_ZED_TT_03Apr2014	2176	13149.9	3	42792	193	636.537	3.80197
IMVNAALQRQFHSPFIFR	CTRL2	D:\AmpK_Pass2\AmpKPass3\CTRL2	CTRL2_300ID_ZORBAX_ZED_TT_03Apr2014	2176	8269.86	3	48080	373	1206.66	3.78727
IMVNAALQRQFHSPFIFR	CTRL3	D:\AmpK_Pass2\AmpKPass3\CTRL3	CTRL3_300ID_ZORBAX_ZED_TT_03Apr2014	2176	13149.9	3	42792	257	798.645	3.77739
IMVNAALQRQFHSPFIFR	CTRL2	D:\AmpK_Pass2\AmpKPass3\CTRL2	CTRL2_300ID_ZORBAX_ZED_TT_03Apr2014	2176	8269.86	3	48080	39	327.181	3.77309
IMVNAALQRQFHSPFIFR	CTRL2	D:\AmpK_Pass2\AmpKPass3\CTRL2	CTRL2_300ID_ZORBAX_ZED_TT_03Apr2014	2176	8269.86	3	48080	91	427.64	3.73869
IMVNAALQRQFHSPFIFR	CTRL2	D:\AmpK_Pass2\AmpKPass3\CTRL2	CTRL2_300ID_ZORBAX_ZED_TT_03Apr2014	2176	8269.86	3	48080	121	471.352	3.73815
IMVNAALQRQFHSPFIFR	CTRL2	D:\AmpK_Pass2\AmpKPass3\CTRL2	CTRL2_300ID_ZORBAX_ZED_TT_03Apr2014	2176	8269.86	3	48080	90	426.267	3.7319
IMVNAALQRQFHSPFIFR	CTRL2	D:\AmpK_Pass2\AmpKPass3\CTRL2	CTRL2_300ID_ZORBAX_ZED_TT_03Apr2014	2176	8269.86	3	48080	115	459.392	3.66605
IMVNAALQRQFHSPFIFR	CTRL3	D:\AmpK_Pass2\AmpKPass3\CTRL3	CTRL3_300ID_ZORBAX_ZED_TT_03Apr2014	2176	13149.9	3	42792	215	674.65	3.65515
IMVNAALQRQFHSPFIFR	CTRL3	D:\AmpK_Pass2\AmpKPass3\CTRL3	CTRL3_300ID_ZORBAX_ZED_TT_03Apr2014	2176	13149.9	3	42792	134	515.12	3.64268
IMVNAALQRQFHSPFIFR	CTRL2	D:\AmpK_Pass2\AmpKPass3\CTRL2	CTRL2_300ID_ZORBAX_ZED_TT_03Apr2014	2176	8269.86	3	48080	335	1032.7	3.58763
IMVNAALQRQFHSPFIFR	CTRL2	D:\AmpK_Pass2\AmpKPass3\CTRL2	CTRL2_300ID_ZORBAX_ZED_TT_03Apr2014	2176	8269.86	3	48080	362	1131.59	3.56316
IMVNAALQRQFHSPFIFR	CTRL2	D:\AmpK_Pass2\AmpKPass3\CTRL2	CTRL2_300ID_ZORBAX_ZED_TT_03Apr2014	2176	8269.86	3	48080	157	532.173	3.54108
IMVNAALQRQFHSPFIFR	CTRL3	D:\AmpK_Pass2\AmpKPass3\CTRL3	CTRL3_300ID_ZORBAX_ZED_TT_03Apr2014	2176	13149.9	3	42792	284	886.392	3.53726
IMVNAALQRQFHSPFIFR	CTRL2	D:\AmpK_Pass2\AmpKPass3\CTRL2	CTRL2_300ID_ZORBAX_ZED_TT_03Apr2014	2176	8269.86	3	48080	230	661.266	3.52826
IMVNAALQRQFHSPFIFR	CTRL3	D:\AmpK_Pass2\AmpKPass3\CTRL3	CTRL3_300ID_ZORBAX_ZED_TT_03Apr2014	2176	13149.9	3	42792	250	781.258	3.50853
IMVNAALQRQFHSPFIFR	CTRL3	D:\AmpK_Pass2\AmpKPass3\CTRL3	CTRL3_300ID_ZORBAX_ZED_TT_03Apr2014	2176	13149.9	3	42792	283	882.41	3.50383
IMVNAALQRQFHSPFIFR	CTRL3	D:\AmpK_Pass2\AmpKPass3\CTRL3	CTRL3_300ID_ZORBAX_ZED_TT_03Apr2014	2176	13149.9	3	42792	129	507.724	3.49996
IMVNAALQRQFHSPFIFR	CTRL2	D:\AmpK_Pass2\AmpKPass3\CTRL2	CTRL2_300ID_ZORBAX_ZED_TT_03Apr2014	2176	8269.86	3	48080	136	495.443	3.48802
IMVNAALQRQFHSPFIFR	CTRL2	D:\AmpK_Pass2\AmpKPass3\CTRL2	CTRL2_300ID_ZORBAX_ZED_TT_03Apr2014	2176	8269.86	3	48080	311	933.741	3.48354
IMVNAALQRQFHSPFIFR	CTRL2	D:\AmpK_Pass2\AmpKPass3\CTRL2	CTRL2_300ID_ZORBAX_ZED_TT_03Apr2014	2176	8269.86	3	48080	80	409.478	3.4139
IMVNAALQRQFHSPFIFR	CTRL2	D:\AmpK_Pass2\AmpKPass3\CTRL2	CTRL2_300ID_ZORBAX_ZED_TT_03Apr2014	2176	8269.86	3	48080	288	857.684	3.37803
IMVNAALQRQFHSPFIFR	CTRL2	D:\AmpK_Pass2\AmpKPass3\CTRL2	CTRL2_300ID_ZORBAX_ZED_TT_03Apr2014	2176	8269.86	3	48080	206	627.661	3.37756
IMVNAALQRQFHSPFIFR	CTRL2	D:\AmpK_Pass2\AmpKPass3\CTRL2	CTRL2_300ID_ZORBAX_ZED_TT_03Apr2014	2176	8269.86	3	48080	211	633.159	3.37735
IMVNAALQRQFHSPFIFR	CTRL3	D:\AmpK_Pass2\AmpKPass3\CTRL3	CTRL3_300ID_ZORBAX_ZED_TT_03Apr2014	2176	13149.9	3	42792	44	333.228	3.37653
IMVNAALQRQFHSPFIFR	CTRL2	D:\AmpK_Pass2\AmpKPass3\CTRL2	CTRL2_300ID_ZORBAX_ZED_TT_03Apr2014	2176	8269.86	3	48080	217	641.978	3.34855
IMVNAALQRQFHSPFIFR	CTRL3	D:\AmpK_Pass2\AmpKPass3\CTRL3	CTRL3_300ID_ZORBAX_ZED_TT_03Apr2014	2176	13149.9	3	42792	68	386.404	3.34059
IMVNAALQRQFHSPFIFR	CTRL2	D:\AmpK_Pass2\AmpKPass3\CTRL2	CTRL2_300ID_ZORBAX_ZED_TT_03Apr2014	2176	8269.86	3	48080	44	334.938	3.33058
IMVNAALQRQFHSPFIFR	CTRL2	D:\AmpK_Pass2\AmpKPass3\CTRL2	CTRL2_300ID_ZORBAX_ZED_TT_03Apr2014	2176	8269.86	3	48080	202	617.164	3.31695
IMVNAALQRQFHSPFIFR	CTRL2	D:\AmpK_Pass2\AmpKPass3\CTRL2	CTRL2_300ID_ZORBAX_ZED_TT_03Apr2014	2176	8269.86	3	48080	299	898.353	3.31429
IMVNAALQRQFHSPFIFR	CTRL2	D:\AmpK_Pass2\AmpKPass3\CTRL2	CTRL2_300ID_ZORBAX_ZED_TT_03Apr2014	2176	8269.86	3	48080	65	380.398	3.30537
IMVNAALQRQFHSPFIFR	CTRL2	D:\AmpK_Pass2\AmpKPass3\CTRL2	CTRL2_300ID_ZORBAX_ZED_TT_03Apr2014	2176	8269.86	3	48080	111	454.375	3.26865
IMVNAALQRQFHSPFIFR	CTRL3	D:\AmpK_Pass2\AmpKPass3\CTRL3	CTRL3_300ID_ZORBAX_ZED_TT_03Apr2014	2176	13149.9	3	42792	93	439.173	3.22561
IMVNAALQRQFHSPFIFR	CTRL2	D:\AmpK_Pass2\AmpKPass3\CTRL2	CTRL2_300ID_ZORBAX_ZED_TT_03Apr2014	2176	8269.86	3	48080	149	519.345	3.22404
IMVNAALQRQFHSPFIFR	CTRL2	D:\AmpK_Pass2\AmpKPass3\CTRL2	CTRL2_300ID_ZORBAX_ZED_TT_03Apr2014	2176	8269.86	3	48080	104	445.506	3.2131
IMVNAALQRQFHSPFIFR	CTRL3	D:\AmpK_Pass2\AmpKPass3\CTRL3	CTRL3_300ID_ZORBAX_ZED_TT_03Apr2014	2176	13149.9	3	42792	273	842.574	3.1971
IMVNAALQRQFHSPFIFR	CTRL3	D:\AmpK_Pass2\AmpKPass3\CTRL3	CTRL3_300ID_ZORBAX_ZED_TT_03Apr2014	2176	13149.9	3	42792	25	284.178	3.19657
IMVNAALQRQFHSPFIFR	CTRL3	D:\AmpK_Pass2\AmpKPass3\CTRL3	CTRL3_300ID_ZORBAX_ZED_TT_03Apr2014	2176	13149.9	3	42792	69	387.208	3.19158
IMVNAALQRQFHSPFIFR	CTRL3	D:\AmpK_Pass2\AmpKPass3\CTRL3	CTRL3_300ID_ZORBAX_ZED_TT_03Apr2014	2176	13149.9	3	42792	140	530.415	3.18188
IMVNAALQRQFHSPFIFR	CTRL3	D:\AmpK_Pass2\AmpKPass3\CTRL3	CTRL3_300ID_ZORBAX_ZED_TT_03Apr2014	2176	13149.9	3	42792	11	238.956	3.18048
IMVNAALQRQFHSPFIFR	CTRL2	D:\AmpK_Pass2\AmpKPass3\CTRL2	CTRL2_300ID_ZORBAX_ZED_TT_03Apr2014	2176	8269.86	3	48080	377	1254.35	3.15854
IMVNAALQRQFHSPFIFR	CTRL2	D:\AmpK_Pass2\AmpKPass3\CTRL2	CTRL2_300ID_ZORBAX_ZED_TT_03Apr2014	2176	8269.86	3	48080	324	976.565	3.13475
IMVNAALQRQFHSPFIFR	CTRL2	D:\AmpK_Pass2\AmpKPass3\CTRL2	CTRL2_300ID_ZORBAX_ZED_TT_03Apr2014	2176	8269.86	3	48080	30	298.841	3.11849
IMVNAALQRQFHSPFIFR	CTRL2	D:\AmpK_Pass2\AmpKPass3\CTRL2	CTRL2_300ID_ZORBAX_ZED_TT_03Apr2014	2176	8269.86	3	48080	52	354.245	3.11526
IMVNAALQRQFHSPFIFR	CTRL2	D:\AmpK_Pass2\AmpKPass3\CTRL2	CTRL2_300ID_ZORBAX_ZED_TT_03Apr2014	2176	8269.86	3	48080	150	521.19	3.10122
IMVNAALQRQFHSPFIFR	CTRL2	D:\AmpK_Pass2\AmpKPass3\CTRL2	CTRL2_300ID_ZORBAX_ZED_TT_03Apr2014	2176	8269.86	3	48080	74	398.228	3.09254
IMVNAALQRQFHSPFIFR	CTRL2	D:\AmpK_Pass2\AmpKPass3\CTRL2	CTRL2_300ID_ZORBAX_ZED_TT_03Apr2014	2176	8269.86	3	48080	113	457.505	3.08839
IMVNAALQRQFHSPFIFR	CTRL2	D:\AmpK_Pass2\AmpKPass3\CTRL2	CTRL2_300ID_ZORBAX_ZED_TT_03Apr2014	2176	8269.86	3	48080	178	571.502	3.01372
IMVNAALQRQFHSPFIFR	CTRL2	D:\AmpK_Pass2\AmpKPass3\CTRL2	CTRL2_300ID_ZORBAX_ZED_TT_03Apr2014	2176	8269.86	3	48080	68	386.21	3.00877
IMVNAALQRQFHSPFIFR	CTRL2	D:\AmpK_Pass2\AmpKPass3\CTRL2	CTRL2_300ID_ZORBAX_ZED_TT_03Apr2014	2176	8269.86	3	48080	169	553.757	2.99034
IMVNAALQRQFHSPFIFR	CTRL2	D:\AmpK_Pass2\AmpKPass3\CTRL2	CTRL2_300ID_ZORBAX_ZED_TT_03Apr2014	2176	8269.86	3	48080	292	869.431	2.9887
IMVNAALQRQFHSPFIFR	CTRL2	D:\AmpK_Pass2\AmpKPass3\CTRL2	CTRL2_300ID_ZORBAX_ZED_TT_03Apr2014	2176	8269.86	3	48080	107	449.513	2.98802
IMVNAALQRQFHSPFIFR	CTRL2	D:\AmpK_Pass2\AmpKPass3\CTRL2	CTRL2_300ID_ZORBAX_ZED_TT_03Apr2014	2176	8269.86	3	48080	307	921.789	2.9818
IMVNAALQRQFHSPFIFR	CTRL2	D:\AmpK_Pass2\AmpKPass3\CTRL2	CTRL2_300ID_ZORBAX_ZED_TT_03Apr2014	2176	8269.86	3	48080	58	368.386	2.96921
IMVNAALQRQFHSPFIFR	CTRL2	D:\AmpK_Pass2\AmpKPass3\CTRL2	CTRL2_300ID_ZORBAX_ZED_TT_03Apr2014	2176	8269.86	3	48080	266	731.076	2.9479
IMVNAALQRQFHSPFIFR	CTRL2	D:\AmpK_Pass2\AmpKPass3\CTRL2	CTRL2_300ID_ZORBAX_ZED_TT_03Apr2014	2176	8269.86	3	48080	192	595.748	2.94677
IMVNAALQRQFHSPFIFR	CTRL2	D:\AmpK_Pass2\AmpKPass3\CTRL2	CTRL2_300ID_ZORBAX_ZED_TT_03Apr2014	2176	8269.86	3	48080	300	899.617	2.94485
IMVNAALQRQFHSPFIFR	CTRL2	D:\AmpK_Pass2\AmpKPass3\CTRL2	CTRL2_300ID_ZORBAX_ZED_TT_03Apr2014	2176	8269.86	3	48080	286	852.429	2.94405
IMVNAALQRQFHSPFIFR	CTRL3	D:\AmpK_Pass2\AmpKPass3\CTRL3	CTRL3_300ID_ZORBAX_ZED_TT_03Apr2014	2176	13149.9	3	42792	7	227.412	2.93214
IMVNAALQRQFHSPFIFR	CTRL3	D:\AmpK_Pass2\AmpKPass3\CTRL3	CTRL3_300ID_ZORBAX_ZED_TT_03Apr2014	2176	13149.9	3	42792	3	219.243	2.92928
IMVNAALQRQFHSPFIFR	CTRL2	D:\AmpK_Pass2\AmpKPass3\CTRL2	CTRL2_300ID_ZORBAX_ZED_TT_03Apr2014	2176	8269.86	3	48080	385	1307.08	2.90022
IMVNAALQRQFHSPFIFR	CTRL3	D:\AmpK_Pass2\AmpKPass3\CTRL3	CTRL3_300ID_ZORBAX_ZED_TT_03Apr2014	2176	13149.9	3	42792	229	702.426	2.89444
IMVNAALQRQFHSPFIFR	CTRL3	D:\AmpK_Pass2\AmpKPass3\CTRL3	CTRL3_300ID_ZORBAX_ZED_TT_03Apr2014	2176	13149.9	3	42792	143	536.429	2.89213
IMVNAALQRQFHSPFIFR	CTRL3	D:\AmpK_Pass2\AmpKPass3\CTRL3	CTRL3_300ID_ZORBAX_ZED_TT_03Apr2014	2176	13149.9	3	42792	336	1093.76	2.89099
IMVNAALQRQFHSPFIFR	CTRL3	D:\AmpK_Pass2\AmpKPass3\CTRL3	CTRL3_300ID_ZORBAX_ZED_TT_03Apr2014	2176	13149.9	3	42792	182	610.747	2.89079
IMVNAALQRQFHSPFIFR	CTRL3	D:\AmpK_Pass2\AmpKPass3\CTRL3	CTRL3_300ID_ZORBAX_ZED_TT_03Apr2014	2176	13149.9	3	42792	89	431.12	2.88684
IMVNAALQRQFHSPFIFR	CTRL2	D:\AmpK_Pass2\AmpKPass3\CTRL2	CTRL2_300ID_ZORBAX_ZED_TT_03Apr2014	2176	8269.86	3	48080	95	433.27	2.88654
IMVNAALQRQFHSPFIFR	CTRL2	D:\AmpK_Pass2\AmpKPass3\CTRL2	CTRL2_300ID_ZORBAX_ZED_TT_03Apr2014	2176	8269.86	3	48080	70	388.474	2.87724
IMVNAALQRQFHSPFIFR	CTRL3	D:\AmpK_Pass2\AmpKPass3\CTRL3	CTRL3_300ID_ZORBAX_ZED_TT_03Apr2014	2176	13149.9	3	42792	228	697.539	2.86859
IMVNAALQRQFHSPFIFR	CTRL2	D:\AmpK_Pass2\AmpKPass3\CTRL2	CTRL2_300ID_ZORBAX_ZED_TT_03Apr2014	2176	8269.86	3	48080	124	474.218	2.86394
IMVNAALQRQFHSPFIFR	CTRL2	D:\AmpK_Pass2\AmpKPass3\CTRL2	CTRL2_300ID_ZORBAX_ZED_TT_03Apr2014	2176	8269.86	3	48080	244	679.468	2.84011
IMVNAALQRQFHSPFIFR	CTRL2	D:\AmpK_Pass2\AmpKPass3\CTRL2	CTRL2_300ID_ZORBAX_ZED_TT_03Apr2014	2176	8269.86	3	48080	72	393.141	2.8096
IMVNAALQRQFHSPFIFR	CTRL2	D:\AmpK_Pass2\AmpKPass3\CTRL2	CTRL2_300ID_ZORBAX_ZED_TT_03Apr2014	2176	8269.86	3	48080	96	436.093	2.78365
IMVNAALQRQFHSPFIFR	CTRL3	D:\AmpK_Pass2\AmpKPass3\CTRL3	CTRL3_300ID_ZORBAX_ZED_TT_03Apr2014	2176	13149.9	3	42792	317	1018.93	2.73886
IMVNAALQRQFHSPFIFR	CTRL3	D:\AmpK_Pass2\AmpKPass3\CTRL3	CTRL3_300ID_ZORBAX_ZED_TT_03Apr2014	2176	13149.9	3	42792	148	551.513	2.73852
IMVNAALQRQFHSPFIFR	CTRL3	D:\AmpK_Pass2\AmpKPass3\CTRL3	CTRL3_300ID_ZORBAX_ZED_TT_03Apr2014	2176	13149.9	3	42792	114	476.493	2.738
IMVNAALQRQFHSPFIFR	CTRL3	D:\AmpK_Pass2\AmpKPass3\CTRL3	CTRL3_300ID_ZORBAX_ZED_TT_03Apr2014	2176	13149.9	3	42792	338	1106.6	2.73709
IMVNAALQRQFHSPFIFR	CTRL3	D:\AmpK_Pass2\AmpKPass3\CTRL3	CTRL3_300ID_ZORBAX_ZED_TT_03Apr2014	2176	13149.9	3	42792	345	1152.4	2.73689
IMVNAALQRQFHSPFIFR	CTRL3	D:\AmpK_Pass2\AmpKPass3\CTRL3	CTRL3_300ID_ZORBAX_ZED_TT_03Apr2014	2176	13149.9	3	42792	115	477.567	2.73665
IMVNAALQRQFHSPFIFR	CTRL3	D:\AmpK_Pass2\AmpKPass3\CTRL3	CTRL3_300ID_ZORBAX_ZED_TT_03Apr2014	2176	13149.9	3	42792	92	434.399	2.73636
IMVNAALQRQFHSPFIFR	CTRL3	D:\AmpK_Pass2\AmpKPass3\CTRL3	CTRL3_300ID_ZORBAX_ZED_TT_03Apr2014	2176	13149.9	3	42792	190	633.229	2.73609
IMVNAALQRQFHSPFIFR	CTRL3	D:\AmpK_Pass2\AmpKPass3\CTRL3	CTRL3_300ID_ZORBAX_ZED_TT_03Apr2014	2176	13149.9	3	42792	360	1301.02	2.73589
IMVNAALQRQFHSPFIFR	CTRL3	D:\AmpK_Pass2\AmpKPass3\CTRL3	CTRL3_300ID_ZORBAX_ZED_TT_03Apr2014	2176	13149.9	3	42792	138	526.458	2.73115
IMVNAALQRQFHSPFIFR	CTRL3	D:\AmpK_Pass2\AmpKPass3\CTRL3	CTRL3_300ID_ZORBAX_ZED_TT_03Apr2014	2176	13149.9	3	42792	271	837.132	2.72729
IMVNAALQRQFHSPFIFR	CTRL2	D:\AmpK_Pass2\AmpKPass3\CTRL2	CTRL2_300ID_ZORBAX_ZED_TT_03Apr2014	2176	8269.86	3	48080	355	1107.19	2.72362
IMVNAALQRQFHSPFIFR	CTRL2	D:\AmpK_Pass2\AmpKPass3\CTRL2	CTRL2_300ID_ZORBAX_ZED_TT_03Apr2014	2176	8269.86	3	48080	251	688.65	2.71618
IMVNAALQRQFHSPFIFR	CTRL2	D:\AmpK_Pass2\AmpKPass3\CTRL2	CTRL2_300ID_ZORBAX_ZED_TT_03Apr2014	2176	8269.86	3	48080	210	632.287	2.67244
IMVNAALQRQFHSPFIFR	CTRL2	D:\AmpK_Pass2\AmpKPass3\CTRL2	CTRL2_300ID_ZORBAX_ZED_TT_03Apr2014	2176	8269.86	3	48080	94	430.414	2.66143
IMVNAALQRQFHSPFIFR	CTRL2	D:\AmpK_Pass2\AmpKPass3\CTRL2	CTRL2_300ID_ZORBAX_ZED_TT_03Apr2014	2176	8269.86	3	48080	17	268.285	2.65721
IMVNAALQRQFHSPFIFR	CTRL2	D:\AmpK_Pass2\AmpKPass3\CTRL2	CTRL2_300ID_ZORBAX_ZED_TT_03Apr2014	2176	8269.86	3	48080	242	674.364	2.61657
IMVNAALQRQFHSPFIFR	CTRL2	D:\AmpK_Pass2\AmpKPass3\CTRL2	CTRL2_300ID_ZORBAX_ZED_TT_03Apr2014	2176	8269.86	3	48080	319	962.38	2.61279
IMVNAALQRQFHSPFIFR	CTRL2	D:\AmpK_Pass2\AmpKPass3\CTRL2	CTRL2_300ID_ZORBAX_ZED_TT_03Apr2014	2176	8269.86	3	48080	365	1151.68	2.59562
IMVNAALQRQFHSPFIFR	CTRL3	D:\AmpK_Pass2\AmpKPass3\CTRL3	CTRL3_300ID_ZORBAX_ZED_TT_03Apr2014	2176	13149.9	3	42792	272	838.897	2.59065
IMVNAALQRQFHSPFIFR	CTRL3	D:\AmpK_Pass2\AmpKPass3\CTRL3	CTRL3_300ID_ZORBAX_ZED_TT_03Apr2014	2176	13149.9	3	42792	307	977.076	2.58461
IMVNAALQRQFHSPFIFR	CTRL3	D:\AmpK_Pass2\AmpKPass3\CTRL3	CTRL3_300ID_ZORBAX_ZED_TT_03Apr2014	2176	13149.9	3	42792	37	316.48	2.5829
IMVNAALQRQFHSPFIFR	CTRL3	D:\AmpK_Pass2\AmpKPass3\CTRL3	CTRL3_300ID_ZORBAX_ZED_TT_03Apr2014	2176	13149.9	3	42792	331	1076.95	2.58091
IMVNAALQRQFHSPFIFR	CTRL3	D:\AmpK_Pass2\AmpKPass3\CTRL3	CTRL3_300ID_ZORBAX_ZED_TT_03Apr2014	2176	13149.9	3	42792	120	486.374	2.57702
IMVNAALQRQFHSPFIFR	CTRL3	D:\AmpK_Pass2\AmpKPass3\CTRL3	CTRL3_300ID_ZORBAX_ZED_TT_03Apr2014	2176	13149.9	3	42792	225	693.138	2.57647
IMVNAALQRQFHSPFIFR	CTRL2	D:\AmpK_Pass2\AmpKPass3\CTRL2	CTRL2_300ID_ZORBAX_ZED_TT_03Apr2014	2176	8269.86	3	48080	133	489.303	2.54305
IMVNAALQRQFHSPFIFR	CTRL2	D:\AmpK_Pass2\AmpKPass3\CTRL2	CTRL2_300ID_ZORBAX_ZED_TT_03Apr2014	2176	8269.86	3	48080	2	217.129	2.54286
IMVNAALQRQFHSPFIFR	CTRL2	D:\AmpK_Pass2\AmpKPass3\CTRL2	CTRL2_300ID_ZORBAX_ZED_TT_03Apr2014	2176	8269.86	3	48080	238	669.448	2.53106
IMVNAALQRQFHSPFIFR	CTRL2	D:\AmpK_Pass2\AmpKPass3\CTRL2	CTRL2_300ID_ZORBAX_ZED_TT_03Apr2014	2176	8269.86	3	48080	224	650.399	2.5237
IMVNAALQRQFHSPFIFR	CTRL2	D:\AmpK_Pass2\AmpKPass3\CTRL2	CTRL2_300ID_ZORBAX_ZED_TT_03Apr2014	2176	8269.86	3	48080	283	830.507	2.50843
IMVNAALQRQFHSPFIFR	CTRL2	D:\AmpK_Pass2\AmpKPass3\CTRL2	CTRL2_300ID_ZORBAX_ZED_TT_03Apr2014	2176	8269.86	3	48080	55	360.815	2.50624
IMVNAALQRQFHSPFIFR	CTRL2	D:\AmpK_Pass2\AmpKPass3\CTRL2	CTRL2_300ID_ZORBAX_ZED_TT_03Apr2014	2176	8269.86	3	48080	250	687.396	2.5008
IMVNAALQRQFHSPFIFR	CTRL2	D:\AmpK_Pass2\AmpKPass3\CTRL2	CTRL2_300ID_ZORBAX_ZED_TT_03Apr2014	2176	8269.86	3	48080	99	440.266	2.46481
IMVNAALQRQFHSPFIFR	CTRL2	D:\AmpK_Pass2\AmpKPass3\CTRL2	CTRL2_300ID_ZORBAX_ZED_TT_03Apr2014	2176	8269.86	3	48080	181	576.43	2.45979
IMVNAALQRQFHSPFIFR	CTRL2	D:\AmpK_Pass2\AmpKPass3\CTRL2	CTRL2_300ID_ZORBAX_ZED_TT_03Apr2014	2176	8269.86	3	48080	106	448.305	2.45256
IMVNAALQRQFHSPFIFR	CTRL3	D:\AmpK_Pass2\AmpKPass3\CTRL3	CTRL3_300ID_ZORBAX_ZED_TT_03Apr2014	2176	13149.9	3	42792	259	802.105	2.44316
IMVNAALQRQFHSPFIFR	CTRL3	D:\AmpK_Pass2\AmpKPass3\CTRL3	CTRL3_300ID_ZORBAX_ZED_TT_03Apr2014	2176	13149.9	3	42792	198	645.247	2.43254
IMVNAALQRQFHSPFIFR	CTRL3	D:\AmpK_Pass2\AmpKPass3\CTRL3	CTRL3_300ID_ZORBAX_ZED_TT_03Apr2014	2176	13149.9	3	42792	31	303.652	2.43129
IMVNAALQRQFHSPFIFR	CTRL3	D:\AmpK_Pass2\AmpKPass3\CTRL3	CTRL3_300ID_ZORBAX_ZED_TT_03Apr2014	2176	13149.9	3	42792	242	748.481	2.4307
IMVNAALQRQFHSPFIFR	CTRL3	D:\AmpK_Pass2\AmpKPass3\CTRL3	CTRL3_300ID_ZORBAX_ZED_TT_03Apr2014	2176	13149.9	3	42792	362	1371.98	2.4304
IMVNAALQRQFHSPFIFR	CTRL3	D:\AmpK_Pass2\AmpKPass3\CTRL3	CTRL3_300ID_ZORBAX_ZED_TT_03Apr2014	2176	13149.9	3	42792	282	879.534	2.43016
IMVNAALQRQFHSPFIFR	CTRL3	D:\AmpK_Pass2\AmpKPass3\CTRL3	CTRL3_300ID_ZORBAX_ZED_TT_03Apr2014	2176	13149.9	3	42792	102	453.478	2.42971
IMVNAALQRQFHSPFIFR	CTRL3	D:\AmpK_Pass2\AmpKPass3\CTRL3	CTRL3_300ID_ZORBAX_ZED_TT_03Apr2014	2176	13149.9	3	42792	305	974.205	2.42835
IMVNAALQRQFHSPFIFR	CTRL3	D:\AmpK_Pass2\AmpKPass3\CTRL3	CTRL3_300ID_ZORBAX_ZED_TT_03Apr2014	2176	13149.9	3	42792	16	253.217	2.42803
IMVNAALQRQFHSPFIFR	CTRL3	D:\AmpK_Pass2\AmpKPass3\CTRL3	CTRL3_300ID_ZORBAX_ZED_TT_03Apr2014	2176	13149.9	3	42792	56	363.378	2.42731
IMVNAALQRQFHSPFIFR	CTRL2	D:\AmpK_Pass2\AmpKPass3\CTRL2	CTRL2_300ID_ZORBAX_ZED_TT_03Apr2014	2176	8269.86	3	48080	163	545.404	2.3989
IMVNAALQRQFHSPFIFR	CTRL2	D:\AmpK_Pass2\AmpKPass3\CTRL2	CTRL2_300ID_ZORBAX_ZED_TT_03Apr2014	2176	8269.86	3	48080	60	370.453	2.39539
IMVNAALQRQFHSPFIFR	CTRL2	D:\AmpK_Pass2\AmpKPass3\CTRL2	CTRL2_300ID_ZORBAX_ZED_TT_03Apr2014	2176	8269.86	3	48080	170	556.392	2.36747
IMVNAALQRQFHSPFIFR	CTRL2	D:\AmpK_Pass2\AmpKPass3\CTRL2	CTRL2_300ID_ZORBAX_ZED_TT_03Apr2014	2176	8269.86	3	48080	291	861.98	2.3611
IMVNAALQRQFHSPFIFR	CTRL2	D:\AmpK_Pass2\AmpKPass3\CTRL2	CTRL2_300ID_ZORBAX_ZED_TT_03Apr2014	2176	8269.86	3	48080	364	1144.72	2.35384
IMVNAALQRQFHSPFIFR	CTRL2	D:\AmpK_Pass2\AmpKPass3\CTRL2	CTRL2_300ID_ZORBAX_ZED_TT_03Apr2014	2176	8269.86	3	48080	218	642.802	2.35166
IMVNAALQRQFHSPFIFR	CTRL2	D:\AmpK_Pass2\AmpKPass3\CTRL2	CTRL2_300ID_ZORBAX_ZED_TT_03Apr2014	2176	8269.86	3	48080	85	419.227	2.35001
IMVNAALQRQFHSPFIFR	CTRL2	D:\AmpK_Pass2\AmpKPass3\CTRL2	CTRL2_300ID_ZORBAX_ZED_TT_03Apr2014	2176	8269.86	3	48080	4	222.928	2.34854
IMVNAALQRQFHSPFIFR	CTRL2	D:\AmpK_Pass2\AmpKPass3\CTRL2	CTRL2_300ID_ZORBAX_ZED_TT_03Apr2014	2176	8269.86	3	48080	261	704.628	2.32462
IMVNAALQRQFHSPFIFR	CTRL2	D:\AmpK_Pass2\AmpKPass3\CTRL2	CTRL2_300ID_ZORBAX_ZED_TT_03Apr2014	2176	8269.86	3	48080	46	338.329	2.29255
IMVNAALQRQFHSPFIFR	CTRL3	D:\AmpK_Pass2\AmpKPass3\CTRL3	CTRL3_300ID_ZORBAX_ZED_TT_03Apr2014	2176	13149.9	3	42792	236	710.516	2.29099
IMVNAALQRQFHSPFIFR	CTRL2	D:\AmpK_Pass2\AmpKPass3\CTRL2	CTRL2_300ID_ZORBAX_ZED_TT_03Apr2014	2176	8269.86	3	48080	174	563.731	2.28975
IMVNAALQRQFHSPFIFR	CTRL3	D:\AmpK_Pass2\AmpKPass3\CTRL3	CTRL3_300ID_ZORBAX_ZED_TT_03Apr2014	2176	13149.9	3	42792	237	727.853	2.28799
IMVNAALQRQFHSPFIFR	CTRL2	D:\AmpK_Pass2\AmpKPass3\CTRL2	CTRL2_300ID_ZORBAX_ZED_TT_03Apr2014	2176	8269.86	3	48080	151	522.209	2.28405
IMVNAALQRQFHSPFIFR	CTRL3	D:\AmpK_Pass2\AmpKPass3\CTRL3	CTRL3_300ID_ZORBAX_ZED_TT_03Apr2014	2176	13149.9	3	42792	232	706.501	2.27965
IMVNAALQRQFHSPFIFR	CTRL3	D:\AmpK_Pass2\AmpKPass3\CTRL3	CTRL3_300ID_ZORBAX_ZED_TT_03Apr2014	2176	13149.9	3	42792	343	1136.92	2.27931
IMVNAALQRQFHSPFIFR	CTRL3	D:\AmpK_Pass2\AmpKPass3\CTRL3	CTRL3_300ID_ZORBAX_ZED_TT_03Apr2014	2176	13149.9	3	42792	297	945.572	2.27888
IMVNAALQRQFHSPFIFR	CTRL3	D:\AmpK_Pass2\AmpKPass3\CTRL3	CTRL3_300ID_ZORBAX_ZED_TT_03Apr2014	2176	13149.9	3	42792	136	519.303	2.27571
IMVNAALQRQFHSPFIFR	CTRL3	D:\AmpK_Pass2\AmpKPass3\CTRL3	CTRL3_300ID_ZORBAX_ZED_TT_03Apr2014	2176	13149.9	3	42792	14	244.227	2.27548
IMVNAALQRQFHSPFIFR	CTRL3	D:\AmpK_Pass2\AmpKPass3\CTRL3	CTRL3_300ID_ZORBAX_ZED_TT_03Apr2014	2176	13149.9	3	42792	46	338.87	2.27447
IMVNAALQRQFHSPFIFR	CTRL2	D:\AmpK_Pass2\AmpKPass3\CTRL2	CTRL2_300ID_ZORBAX_ZED_TT_03Apr2014	2176	8269.86	3	48080	296	886.639	2.22939
IMVNAALQRQFHSPFIFR	CTRL2	D:\AmpK_Pass2\AmpKPass3\CTRL2	CTRL2_300ID_ZORBAX_ZED_TT_03Apr2014	2176	8269.86	3	48080	332	1005.56	2.19081
IMVNAALQRQFHSPFIFR	CTRL2	D:\AmpK_Pass2\AmpKPass3\CTRL2	CTRL2_300ID_ZORBAX_ZED_TT_03Apr2014	2176	8269.86	3	48080	254	693.165	2.18216
IMVNAALQRQFHSPFIFR	CTRL2	D:\AmpK_Pass2\AmpKPass3\CTRL2	CTRL2_300ID_ZORBAX_ZED_TT_03Apr2014	2176	8269.86	3	48080	270	755.915	2.18067
IMVNAALQRQFHSPFIFR	CTRL3	D:\AmpK_Pass2\AmpKPass3\CTRL3	CTRL3_300ID_ZORBAX_ZED_TT_03Apr2014	2176	13149.9	3	42792	178	606.382	2.15673
IMVNAALQRQFHSPFIFR	CTRL2	D:\AmpK_Pass2\AmpKPass3\CTRL2	CTRL2_300ID_ZORBAX_ZED_TT_03Apr2014	2176	8269.86	3	48080	302	901.575	2.14463
IMVNAALQRQFHSPFIFR	CTRL3	D:\AmpK_Pass2\AmpKPass3\CTRL3	CTRL3_300ID_ZORBAX_ZED_TT_03Apr2014	2176	13149.9	3	42792	244	753.681	2.13895
IMVNAALQRQFHSPFIFR	CTRL3	D:\AmpK_Pass2\AmpKPass3\CTRL3	CTRL3_300ID_ZORBAX_ZED_TT_03Apr2014	2176	13149.9	3	42792	79	409.253	2.12585
IMVNAALQRQFHSPFIFR	CTRL3	D:\AmpK_Pass2\AmpKPass3\CTRL3	CTRL3_300ID_ZORBAX_ZED_TT_03Apr2014	2176	13149.9	3	42792	206	659.243	2.12563
IMVNAALQRQFHSPFIFR	CTRL2	D:\AmpK_Pass2\AmpKPass3\CTRL2	CTRL2_300ID_ZORBAX_ZED_TT_03Apr2014	2176	8269.86	3	48080	117	464.314	2.12398
IMVNAALQRQFHSPFIFR	CTRL3	D:\AmpK_Pass2\AmpKPass3\CTRL3	CTRL3_300ID_ZORBAX_ZED_TT_03Apr2014	2176	13149.9	3	42792	354	1238.32	2.12122
IMVNAALQRQFHSPFIFR	CTRL2	D:\AmpK_Pass2\AmpKPass3\CTRL2	CTRL2_300ID_ZORBAX_ZED_TT_03Apr2014	2176	8269.86	3	48080	276	798.618	2.11295
IMVNAALQRQFHSPFIFR	CTRL2	D:\AmpK_Pass2\AmpKPass3\CTRL2	CTRL2_300ID_ZORBAX_ZED_TT_03Apr2014	2176	8269.86	3	48080	122	472.167	2.0778
IMVNAALQRQFHSPFIFR	CTRL2	D:\AmpK_Pass2\AmpKPass3\CTRL2	CTRL2_300ID_ZORBAX_ZED_TT_03Apr2014	2176	8269.86	3	48080	289	858.684	2.07435
IMVNAALQRQFHSPFIFR	CTRL2	D:\AmpK_Pass2\AmpKPass3\CTRL2	CTRL2_300ID_ZORBAX_ZED_TT_03Apr2014	2176	8269.86	3	48080	118	466.024	2.07211
IMVNAALQRQFHSPFIFR	CTRL2	D:\AmpK_Pass2\AmpKPass3\CTRL2	CTRL2_300ID_ZORBAX_ZED_TT_03Apr2014	2176	8269.86	3	48080	87	422.587	2.05547
IMVNAALQRQFHSPFIFR	CTRL2	D:\AmpK_Pass2\AmpKPass3\CTRL2	CTRL2_300ID_ZORBAX_ZED_TT_03Apr2014	2176	8269.86	3	48080	5	227.186	2.04621
IMVNAALQRQFHSPFIFR	CTRL2	D:\AmpK_Pass2\AmpKPass3\CTRL2	CTRL2_300ID_ZORBAX_ZED_TT_03Apr2014	2176	8269.86	3	48080	78	404.807	2.04226
IMVNAALQRQFHSPFIFR	CTRL2	D:\AmpK_Pass2\AmpKPass3\CTRL2	CTRL2_300ID_ZORBAX_ZED_TT_03Apr2014	2176	8269.86	3	48080	310	932.567	2.03309
IMVNAALQRQFHSPFIFR	CTRL2	D:\AmpK_Pass2\AmpKPass3\CTRL2	CTRL2_300ID_ZORBAX_ZED_TT_03Apr2014	2176	8269.86	3	48080	275	793.639	2.01705
IMVNAALQRQFHSPFIFR	CTRL2	D:\AmpK_Pass2\AmpKPass3\CTRL2	CTRL2_300ID_ZORBAX_ZED_TT_03Apr2014	2176	8269.86	3	48080	298	888.811	1.99459
IMVNAALQRQFHSPFIFR	CTRL3	D:\AmpK_Pass2\AmpKPass3\CTRL3	CTRL3_300ID_ZORBAX_ZED_TT_03Apr2014	2176	13149.9	3	42792	50	343.497	1.98743
IMVNAALQRQFHSPFIFR	CTRL3	D:\AmpK_Pass2\AmpKPass3\CTRL3	CTRL3_300ID_ZORBAX_ZED_TT_03Apr2014	2176	13149.9	3	42792	2	208.71	1.97634
IMVNAALQRQFHSPFIFR	CTRL3	D:\AmpK_Pass2\AmpKPass3\CTRL3	CTRL3_300ID_ZORBAX_ZED_TT_03Apr2014	2176	13149.9	3	42792	266	816.34	1.97379
IMVNAALQRQFHSPFIFR	CTRL2	D:\AmpK_Pass2\AmpKPass3\CTRL2	CTRL2_300ID_ZORBAX_ZED_TT_03Apr2014	2176	8269.86	3	48080	77	402.329	1.96973
IMVNAALQRQFHSPFIFR	CTRL2	D:\AmpK_Pass2\AmpKPass3\CTRL2	CTRL2_300ID_ZORBAX_ZED_TT_03Apr2014	2176	8269.86	3	48080	148	517.253	1.96878
IMVNAALQRQFHSPFIFR	CTRL2	D:\AmpK_Pass2\AmpKPass3\CTRL2	CTRL2_300ID_ZORBAX_ZED_TT_03Apr2014	2176	8269.86	3	48080	321	969.926	1.96536
IMVNAALQRQFHSPFIFR	CTRL2	D:\AmpK_Pass2\AmpKPass3\CTRL2	CTRL2_300ID_ZORBAX_ZED_TT_03Apr2014	2176	8269.86	3	48080	262	705.668	1.96471
IMVNAALQRQFHSPFIFR	CTRL3	D:\AmpK_Pass2\AmpKPass3\CTRL3	CTRL3_300ID_ZORBAX_ZED_TT_03Apr2014	2176	13149.9	3	42792	108	469.82	1.9073
IMVNAALQRQFHSPFIFR	CTRL2	D:\AmpK_Pass2\AmpKPass3\CTRL2	CTRL2_300ID_ZORBAX_ZED_TT_03Apr2014	2176	8269.86	3	48080	260	701.864	1.90046
IMVNAALQRQFHSPFIFR	CTRL2	D:\AmpK_Pass2\AmpKPass3\CTRL2	CTRL2_300ID_ZORBAX_ZED_TT_03Apr2014	2176	8269.86	3	48080	213	635.305	1.89982
IMVNAALQRQFHSPFIFR	CTRL2	D:\AmpK_Pass2\AmpKPass3\CTRL2	CTRL2_300ID_ZORBAX_ZED_TT_03Apr2014	2176	8269.86	3	48080	76	400.852	1.89832
IMVNAALQRQFHSPFIFR	CTRL2	D:\AmpK_Pass2\AmpKPass3\CTRL2	CTRL2_300ID_ZORBAX_ZED_TT_03Apr2014	2176	8269.86	3	48080	323	974.783	1.898
IMVNAALQRQFHSPFIFR	CTRL2	D:\AmpK_Pass2\AmpKPass3\CTRL2	CTRL2_300ID_ZORBAX_ZED_TT_03Apr2014	2176	8269.86	3	48080	240	672.367	1.89742
IMVNAALQRQFHSPFIFR	CTRL2	D:\AmpK_Pass2\AmpKPass3\CTRL2	CTRL2_300ID_ZORBAX_ZED_TT_03Apr2014	2176	8269.86	3	48080	358	1118.24	1.87817
IMVNAALQRQFHSPFIFR	CTRL2	D:\AmpK_Pass2\AmpKPass3\CTRL2	CTRL2_300ID_ZORBAX_ZED_TT_03Apr2014	2176	8269.86	3	48080	200	609.28	1.8608
IMVNAALQRQFHSPFIFR	CTRL2	D:\AmpK_Pass2\AmpKPass3\CTRL2	CTRL2_300ID_ZORBAX_ZED_TT_03Apr2014	2176	8269.86	3	48080	176	568.771	1.85734
IMVNAALQRQFHSPFIFR	CTRL2	D:\AmpK_Pass2\AmpKPass3\CTRL2	CTRL2_300ID_ZORBAX_ZED_TT_03Apr2014	2176	8269.86	3	48080	25	285.184	1.85619
IMVNAALQRQFHSPFIFR	CTRL2	D:\AmpK_Pass2\AmpKPass3\CTRL2	CTRL2_300ID_ZORBAX_ZED_TT_03Apr2014	2176	8269.86	3	48080	172	560.608	1.85594
IMVNAALQRQFHSPFIFR	CTRL2	D:\AmpK_Pass2\AmpKPass3\CTRL2	CTRL2_300ID_ZORBAX_ZED_TT_03Apr2014	2176	8269.86	3	48080	175	565.665	1.85587
IMVNAALQRQFHSPFIFR	CTRL2	D:\AmpK_Pass2\AmpKPass3\CTRL2	CTRL2_300ID_ZORBAX_ZED_TT_03Apr2014	2176	8269.86	3	48080	387	1406.06	1.8549
IMVNAALQRQFHSPFIFR	CTRL2	D:\AmpK_Pass2\AmpKPass3\CTRL2	CTRL2_300ID_ZORBAX_ZED_TT_03Apr2014	2176	8269.86	3	48080	6	228.725	1.8542
IMVNAALQRQFHSPFIFR	CTRL2	D:\AmpK_Pass2\AmpKPass3\CTRL2	CTRL2_300ID_ZORBAX_ZED_TT_03Apr2014	2176	8269.86	3	48080	376	1241.04	1.85332
IMVNAALQRQFHSPFIFR	CTRL2	D:\AmpK_Pass2\AmpKPass3\CTRL2	CTRL2_300ID_ZORBAX_ZED_TT_03Apr2014	2176	8269.86	3	48080	41	331.242	1.8524
IMVNAALQRQFHSPFIFR	CTRL2	D:\AmpK_Pass2\AmpKPass3\CTRL2	CTRL2_300ID_ZORBAX_ZED_TT_03Apr2014	2176	8269.86	3	48080	269	754.632	1.85049
IMVNAALQRQFHSPFIFR	CTRL3	D:\AmpK_Pass2\AmpKPass3\CTRL3	CTRL3_300ID_ZORBAX_ZED_TT_03Apr2014	2176	13149.9	3	42792	163	577.576	1.8192
IMVNAALQRQFHSPFIFR	CTRL2	D:\AmpK_Pass2\AmpKPass3\CTRL2	CTRL2_300ID_ZORBAX_ZED_TT_03Apr2014	2176	8269.86	3	48080	204	623.436	1.7995
IMVNAALQRQFHSPFIFR	CTRL2	D:\AmpK_Pass2\AmpKPass3\CTRL2	CTRL2_300ID_ZORBAX_ZED_TT_03Apr2014	2176	8269.86	3	48080	389	1411.2	1.78781
IMVNAALQRQFHSPFIFR	CTRL2	D:\AmpK_Pass2\AmpKPass3\CTRL2	CTRL2_300ID_ZORBAX_ZED_TT_03Apr2014	2176	8269.86	3	48080	93	429.632	1.77362
IMVNAALQRQFHSPFIFR	CTRL2	D:\AmpK_Pass2\AmpKPass3\CTRL2	CTRL2_300ID_ZORBAX_ZED_TT_03Apr2014	2176	8269.86	3	48080	24	284.271	1.74663
IMVNAALQRQFHSPFIFR	CTRL2	D:\AmpK_Pass2\AmpKPass3\CTRL2	CTRL2_300ID_ZORBAX_ZED_TT_03Apr2014	2176	8269.86	3	48080	334	1031.69	1.74661
IMVNAALQRQFHSPFIFR	CTRL2	D:\AmpK_Pass2\AmpKPass3\CTRL2	CTRL2_300ID_ZORBAX_ZED_TT_03Apr2014	2176	8269.86	3	48080	187	585.364	1.74584
IMVNAALQRQFHSPFIFR	CTRL2	D:\AmpK_Pass2\AmpKPass3\CTRL2	CTRL2_300ID_ZORBAX_ZED_TT_03Apr2014	2176	8269.86	3	48080	71	389.293	1.74207
IMVNAALQRQFHSPFIFR	CTRL3	D:\AmpK_Pass2\AmpKPass3\CTRL3	CTRL3_300ID_ZORBAX_ZED_TT_03Apr2014	2176	13149.9	3	42792	131	509.404	1.70766
IMVNAALQRQFHSPFIFR	CTRL3	D:\AmpK_Pass2\AmpKPass3\CTRL3	CTRL3_300ID_ZORBAX_ZED_TT_03Apr2014	2176	13149.9	3	42792	263	813.477	1.70333
IMVNAALQRQFHSPFIFR	CTRL3	D:\AmpK_Pass2\AmpKPass3\CTRL3	CTRL3_300ID_ZORBAX_ZED_TT_03Apr2014	2176	13149.9	3	42792	58	368.144	1.66513
IMVNAALQRQFHSPFIFR	CTRL3	D:\AmpK_Pass2\AmpKPass3\CTRL3	CTRL3_300ID_ZORBAX_ZED_TT_03Apr2014	2176	13149.9	3	42792	39	319.195	1.66481
IMVNAALQRQFHSPFIFR	CTRL3	D:\AmpK_Pass2\AmpKPass3\CTRL3	CTRL3_300ID_ZORBAX_ZED_TT_03Apr2014	2176	13149.9	3	42792	116	480.44	1.66448
IMVNAALQRQFHSPFIFR	CTRL3	D:\AmpK_Pass2\AmpKPass3\CTRL3	CTRL3_300ID_ZORBAX_ZED_TT_03Apr2014	2176	13149.9	3	42792	128	504.373	1.66185
IMVNAALQRQFHSPFIFR	CTRL2	D:\AmpK_Pass2\AmpKPass3\CTRL2	CTRL2_300ID_ZORBAX_ZED_TT_03Apr2014	2176	8269.86	3	48080	346	1063.52	1.63904
IMVNAALQRQFHSPFIFR	CTRL2	D:\AmpK_Pass2\AmpKPass3\CTRL2	CTRL2_300ID_ZORBAX_ZED_TT_03Apr2014	2176	8269.86	3	48080	326	986.879	1.63379
IMVNAALQRQFHSPFIFR	CTRL2	D:\AmpK_Pass2\AmpKPass3\CTRL2	CTRL2_300ID_ZORBAX_ZED_TT_03Apr2014	2176	8269.86	3	48080	208	630.059	1.6064
IMVNAALQRQFHSPFIFR	CTRL2	D:\AmpK_Pass2\AmpKPass3\CTRL2	CTRL2_300ID_ZORBAX_ZED_TT_03Apr2014	2176	8269.86	3	48080	259	698.721	1.58846
IMVNAALQRQFHSPFIFR	CTRL2	D:\AmpK_Pass2\AmpKPass3\CTRL2	CTRL2_300ID_ZORBAX_ZED_TT_03Apr2014	2176	8269.86	3	48080	333	1019.29	1.58273
IMVNAALQRQFHSPFIFR	CTRL2	D:\AmpK_Pass2\AmpKPass3\CTRL2	CTRL2_300ID_ZORBAX_ZED_TT_03Apr2014	2176	8269.86	3	48080	19	271.324	1.53635
IMVNAALQRQFHSPFIFR	CTRL2	D:\AmpK_Pass2\AmpKPass3\CTRL2	CTRL2_300ID_ZORBAX_ZED_TT_03Apr2014	2176	8269.86	3	48080	158	535.837	1.53394
IMVNAALQRQFHSPFIFR	CTRL2	D:\AmpK_Pass2\AmpKPass3\CTRL2	CTRL2_300ID_ZORBAX_ZED_TT_03Apr2014	2176	8269.86	3	48080	166	549.689	1.52996
IMVNAALQRQFHSPFIFR	CTRL2	D:\AmpK_Pass2\AmpKPass3\CTRL2	CTRL2_300ID_ZORBAX_ZED_TT_03Apr2014	2176	8269.86	3	48080	356	1108.07	1.529
IMVNAALQRQFHSPFIFR	CTRL2	D:\AmpK_Pass2\AmpKPass3\CTRL2	CTRL2_300ID_ZORBAX_ZED_TT_03Apr2014	2176	8269.86	3	48080	196	604.711	1.52691
IMVNAALQRQFHSPFIFR	CTRL2	D:\AmpK_Pass2\AmpKPass3\CTRL2	CTRL2_300ID_ZORBAX_ZED_TT_03Apr2014	2176	8269.86	3	48080	179	572.88	1.52568
IMVNAALQRQFHSPFIFR	CTRL3	D:\AmpK_Pass2\AmpKPass3\CTRL3	CTRL3_300ID_ZORBAX_ZED_TT_03Apr2014	2176	13149.9	3	42792	12	241.326	1.51427
IMVNAALQRQFHSPFIFR	CTRL3	D:\AmpK_Pass2\AmpKPass3\CTRL3	CTRL3_300ID_ZORBAX_ZED_TT_03Apr2014	2176	13149.9	3	42792	319	1027.93	1.5138
IMVNAALQRQFHSPFIFR	CTRL3	D:\AmpK_Pass2\AmpKPass3\CTRL3	CTRL3_300ID_ZORBAX_ZED_TT_03Apr2014	2176	13149.9	3	42792	125	497.603	1.51263
IMVNAALQRQFHSPFIFR	CTRL2	D:\AmpK_Pass2\AmpKPass3\CTRL2	CTRL2_300ID_ZORBAX_ZED_TT_03Apr2014	2176	8269.86	3	48080	309	930.655	1.50891
IMVNAALQRQFHSPFIFR	CTRL2	D:\AmpK_Pass2\AmpKPass3\CTRL2	CTRL2_300ID_ZORBAX_ZED_TT_03Apr2014	2176	8269.86	3	48080	345	1053.82	1.50133
IMVNAALQRQFHSPFIFR	CTRL2	D:\AmpK_Pass2\AmpKPass3\CTRL2	CTRL2_300ID_ZORBAX_ZED_TT_03Apr2014	2176	8269.86	3	48080	279	814.73	1.45458
IMVNAALQRQFHSPFIFR	CTRL2	D:\AmpK_Pass2\AmpKPass3\CTRL2	CTRL2_300ID_ZORBAX_ZED_TT_03Apr2014	2176	8269.86	3	48080	142	505.26	1.42559
IMVNAALQRQFHSPFIFR	CTRL2	D:\AmpK_Pass2\AmpKPass3\CTRL2	CTRL2_300ID_ZORBAX_ZED_TT_03Apr2014	2176	8269.86	3	48080	177	569.487	1.42131
IMVNAALQRQFHSPFIFR	CTRL2	D:\AmpK_Pass2\AmpKPass3\CTRL2	CTRL2_300ID_ZORBAX_ZED_TT_03Apr2014	2176	8269.86	3	48080	278	812.532	1.42116
IMVNAALQRQFHSPFIFR	CTRL2	D:\AmpK_Pass2\AmpKPass3\CTRL2	CTRL2_300ID_ZORBAX_ZED_TT_03Apr2014	2176	8269.86	3	48080	141	504.484	1.42042
IMVNAALQRQFHSPFIFR	CTRL2	D:\AmpK_Pass2\AmpKPass3\CTRL2	CTRL2_300ID_ZORBAX_ZED_TT_03Apr2014	2176	8269.86	3	48080	155	527.28	1.42002
IMVNAALQRQFHSPFIFR	CTRL2	D:\AmpK_Pass2\AmpKPass3\CTRL2	CTRL2_300ID_ZORBAX_ZED_TT_03Apr2014	2176	8269.86	3	48080	201	614.036	1.41973
IMVNAALQRQFHSPFIFR	CTRL2	D:\AmpK_Pass2\AmpKPass3\CTRL2	CTRL2_300ID_ZORBAX_ZED_TT_03Apr2014	2176	8269.86	3	48080	32	301.26	1.36906
IMVNAALQRQFHSPFIFR	CTRL3	D:\AmpK_Pass2\AmpKPass3\CTRL3	CTRL3_300ID_ZORBAX_ZED_TT_03Apr2014	2176	13149.9	3	42792	22	274.441	1.31629
IMVNAALQRQFHSPFIFR	CTRL2	D:\AmpK_Pass2\AmpKPass3\CTRL2	CTRL2_300ID_ZORBAX_ZED_TT_03Apr2014	2176	8269.86	3	48080	127	479.345	1.31514
IMVNAALQRQFHSPFIFR	CTRL2	D:\AmpK_Pass2\AmpKPass3\CTRL2	CTRL2_300ID_ZORBAX_ZED_TT_03Apr2014	2176	8269.86	3	48080	340	1043.91	1.31425
IMVNAALQRQFHSPFIFR	CTRL2	D:\AmpK_Pass2\AmpKPass3\CTRL2	CTRL2_300ID_ZORBAX_ZED_TT_03Apr2014	2176	8269.86	3	48080	42	333.724	1.31151
IMVNAALQRQFHSPFIFR	CTRL2	D:\AmpK_Pass2\AmpKPass3\CTRL2	CTRL2_300ID_ZORBAX_ZED_TT_03Apr2014	2176	8269.86	3	48080	57	367.544	1.30975
IMVNAALQRQFHSPFIFR	CTRL2	D:\AmpK_Pass2\AmpKPass3\CTRL2	CTRL2_300ID_ZORBAX_ZED_TT_03Apr2014	2176	8269.86	3	48080	381	1299.26	1.26056
IMVNAALQRQFHSPFIFR	CTRL2	D:\AmpK_Pass2\AmpKPass3\CTRL2	CTRL2_300ID_ZORBAX_ZED_TT_03Apr2014	2176	8269.86	3	48080	336	1034.98	1.22945
IMVNAALQRQFHSPFIFR	CTRL2	D:\AmpK_Pass2\AmpKPass3\CTRL2	CTRL2_300ID_ZORBAX_ZED_TT_03Apr2014	2176	8269.86	3	48080	40	328.181	1.20514
IMVNAALQRQFHSPFIFR	CTRL2	D:\AmpK_Pass2\AmpKPass3\CTRL2	CTRL2_300ID_ZORBAX_ZED_TT_03Apr2014	2176	8269.86	3	48080	36	315.097	1.20405
IMVNAALQRQFHSPFIFR	CTRL2	D:\AmpK_Pass2\AmpKPass3\CTRL2	CTRL2_300ID_ZORBAX_ZED_TT_03Apr2014	2176	8269.86	3	48080	84	416.135	1.19983
IMVNAALQRQFHSPFIFR	CTRL2	D:\AmpK_Pass2\AmpKPass3\CTRL2	CTRL2_300ID_ZORBAX_ZED_TT_03Apr2014	2176	8269.86	3	48080	247	682.628	1.19232
IMVNAALQRQFHSPFIFR	CTRL2	D:\AmpK_Pass2\AmpKPass3\CTRL2	CTRL2_300ID_ZORBAX_ZED_TT_03Apr2014	2176	8269.86	3	48080	18	268.894	1.09459
IMVNAALQRQFHSPFIFR	CTRL2	D:\AmpK_Pass2\AmpKPass3\CTRL2	CTRL2_300ID_ZORBAX_ZED_TT_03Apr2014	2176	8269.86	3	48080	188	588.631	1.09236
IMVNAALQRQFHSPFIFR	CTRL2	D:\AmpK_Pass2\AmpKPass3\CTRL2	CTRL2_300ID_ZORBAX_ZED_TT_03Apr2014	2176	8269.86	3	48080	384	1305.9	1.09172
IMVNAALQRQFHSPFIFR	CTRL2	D:\AmpK_Pass2\AmpKPass3\CTRL2	CTRL2_300ID_ZORBAX_ZED_TT_03Apr2014	2176	8269.86	3	48080	314	948.066	1.09125
IMVNAALQRQFHSPFIFR	CTRL2	D:\AmpK_Pass2\AmpKPass3\CTRL2	CTRL2_300ID_ZORBAX_ZED_TT_03Apr2014	2176	8269.86	3	48080	313	944.687	1.06136
IMVNAALQRQFHSPFIFR	CTRL2	D:\AmpK_Pass2\AmpKPass3\CTRL2	CTRL2_300ID_ZORBAX_ZED_TT_03Apr2014	2176	8269.86	3	48080	134	491.347	0.987914
IMVNAALQRQFHSPFIFR	CTRL2	D:\AmpK_Pass2\AmpKPass3\CTRL2	CTRL2_300ID_ZORBAX_ZED_TT_03Apr2014	2176	8269.86	3	48080	327	988.594	0.986771
IMVNAALQRQFHSPFIFR	CTRL2	D:\AmpK_Pass2\AmpKPass3\CTRL2	CTRL2_300ID_ZORBAX_ZED_TT_03Apr2014	2176	8269.86	3	48080	354	1094.62	0.986255
IMVNAALQRQFHSPFIFR	CTRL2	D:\AmpK_Pass2\AmpKPass3\CTRL2	CTRL2_300ID_ZORBAX_ZED_TT_03Apr2014	2176	8269.86	3	48080	272	768.738	0.98542
IMVNAALQRQFHSPFIFR	CTRL2	D:\AmpK_Pass2\AmpKPass3\CTRL2	CTRL2_300ID_ZORBAX_ZED_TT_03Apr2014	2176	8269.86	3	48080	303	902.631	0.982772
IMVNAALQRQFHSPFIFR	CTRL2	D:\AmpK_Pass2\AmpKPass3\CTRL2	CTRL2_300ID_ZORBAX_ZED_TT_03Apr2014	2176	8269.86	3	48080	229	658.836	0.877571
IMVNAALQRQFHSPFIFR	CTRL2	D:\AmpK_Pass2\AmpKPass3\CTRL2	CTRL2_300ID_ZORBAX_ZED_TT_03Apr2014	2176	8269.86	3	48080	27	290.951	0.87737
IMVNAALQRQFHSPFIFR	CTRL2	D:\AmpK_Pass2\AmpKPass3\CTRL2	CTRL2_300ID_ZORBAX_ZED_TT_03Apr2014	2176	8269.86	3	48080	123	473.592	0.771811
KVMIVITDGESHDSPDLEK	CTRL3	D:\AmpK_Pass2\AmpKPass3\CTRL3	CTRL3_300ID_ZORBAX_ZED_TT_03Apr2014	2114.76	12296.4	3	46093	221	1009.68	95.3666
KVMIVITDGESHDSPDLEK	CTRL3	D:\AmpK_Pass2\AmpKPass3\CTRL3	CTRL3_300ID_ZORBAX_ZED_TT_03Apr2014	2114.76	12296.4	3	46093	182	745.434	70.5767
KVMIVITDGESHDSPDLEK	CTRL3	D:\AmpK_Pass2\AmpKPass3\CTRL3	CTRL3_300ID_ZORBAX_ZED_TT_03Apr2014	2114.76	12296.4	3	46093	172	687.592	68.3275
KVMIVITDGESHDSPDLEK	CTRL3	D:\AmpK_Pass2\AmpKPass3\CTRL3	CTRL3_300ID_ZORBAX_ZED_TT_03Apr2014	2114.76	12296.4	3	46093	233	1085.84	62.6049
KVMIVITDGESHDSPDLEK	CTRL3	D:\AmpK_Pass2\AmpKPass3\CTRL3	CTRL3_300ID_ZORBAX_ZED_TT_03Apr2014	2114.76	12296.4	3	46093	115	571.377	62.0983
KVMIVITDGESHDSPDLEK	CTRL3	D:\AmpK_Pass2\AmpKPass3\CTRL3	CTRL3_300ID_ZORBAX_ZED_TT_03Apr2014	2114.76	12296.4	3	46093	200	877.515	61.3235
KVMIVITDGESHDSPDLEK	CTRL3	D:\AmpK_Pass2\AmpKPass3\CTRL3	CTRL3_300ID_ZORBAX_ZED_TT_03Apr2014	2114.76	12296.4	3	46093	238	1129.94	57.4265
KVMIVITDGESHDSPDLEK	CTRL3	D:\AmpK_Pass2\AmpKPass3\CTRL3	CTRL3_300ID_ZORBAX_ZED_TT_03Apr2014	2114.76	12296.4	3	46093	214	965.544	54.8461
KVMIVITDGESHDSPDLEK	CTRL3	D:\AmpK_Pass2\AmpKPass3\CTRL3	CTRL3_300ID_ZORBAX_ZED_TT_03Apr2014	2114.76	12296.4	3	46093	37	336.334	54.0845
KVMIVITDGESHDSPDLEK	CTRL3	D:\AmpK_Pass2\AmpKPass3\CTRL3	CTRL3_300ID_ZORBAX_ZED_TT_03Apr2014	2114.76	12296.4	3	46093	224	1041.79	51.8275
KVMIVITDGESHDSPDLEK	CTRL3	D:\AmpK_Pass2\AmpKPass3\CTRL3	CTRL3_300ID_ZORBAX_ZED_TT_03Apr2014	2114.76	12296.4	3	46093	248	1365.9	51.1468
KVMIVITDGESHDSPDLEK	CTRL3	D:\AmpK_Pass2\AmpKPass3\CTRL3	CTRL3_300ID_ZORBAX_ZED_TT_03Apr2014	2114.76	12296.4	3	46093	12	254.072	37.6344
KVMIVITDGESHDSPDLEK	CTRL3	D:\AmpK_Pass2\AmpKPass3\CTRL3	CTRL3_300ID_ZORBAX_ZED_TT_03Apr2014	2114.76	12296.4	3	46093	195	833.592	35.7886
KVMIVITDGESHDSPDLEK	CTRL3	D:\AmpK_Pass2\AmpKPass3\CTRL3	CTRL3_300ID_ZORBAX_ZED_TT_03Apr2014	2114.76	12296.4	3	46093	241	1173.69	34.8142
KVMIVITDGESHDSPDLEK	CTRL3	D:\AmpK_Pass2\AmpKPass3\CTRL3	CTRL3_300ID_ZORBAX_ZED_TT_03Apr2014	2114.76	12296.4	3	46093	205	921.582	33.3407
KVMIVITDGESHDSPDLEK	CTRL3	D:\AmpK_Pass2\AmpKPass3\CTRL3	CTRL3_300ID_ZORBAX_ZED_TT_03Apr2014	2114.76	12296.4	3	46093	243	1217.64	31.0565
KVMIVITDGESHDSPDLEK	CTRL3	D:\AmpK_Pass2\AmpKPass3\CTRL3	CTRL3_300ID_ZORBAX_ZED_TT_03Apr2014	2114.76	12296.4	3	46093	202	909.652	31.0476
KVMIVITDGESHDSPDLEK	CTRL3	D:\AmpK_Pass2\AmpKPass3\CTRL3	CTRL3_300ID_ZORBAX_ZED_TT_03Apr2014	2114.76	12296.4	3	46093	228	1053.79	30.9884
KVMIVITDGESHDSPDLEK	CTRL3	D:\AmpK_Pass2\AmpKPass3\CTRL3	CTRL3_300ID_ZORBAX_ZED_TT_03Apr2014	2114.76	12296.4	3	46093	99	513.587	30.002
KVMIVITDGESHDSPDLEK	CTRL3	D:\AmpK_Pass2\AmpKPass3\CTRL3	CTRL3_300ID_ZORBAX_ZED_TT_03Apr2014	2114.76	12296.4	3	46093	163	675.366	29.5995
KVMIVITDGESHDSPDLEK	CTRL3	D:\AmpK_Pass2\AmpKPass3\CTRL3	CTRL3_300ID_ZORBAX_ZED_TT_03Apr2014	2114.76	12296.4	3	46093	51	380.254	29.5021
KVMIVITDGESHDSPDLEK	CTRL3	D:\AmpK_Pass2\AmpKPass3\CTRL3	CTRL3_300ID_ZORBAX_ZED_TT_03Apr2014	2114.76	12296.4	3	46093	47	358.31	29.4616
KVMIVITDGESHDSPDLEK	CTRL3	D:\AmpK_Pass2\AmpKPass3\CTRL3	CTRL3_300ID_ZORBAX_ZED_TT_03Apr2014	2114.76	12296.4	3	46093	189	798.946	29.277
KVMIVITDGESHDSPDLEK	CTRL3	D:\AmpK_Pass2\AmpKPass3\CTRL3	CTRL3_300ID_ZORBAX_ZED_TT_03Apr2014	2114.76	12296.4	3	46093	176	701.401	28.8898
KVMIVITDGESHDSPDLEK	CTRL3	D:\AmpK_Pass2\AmpKPass3\CTRL3	CTRL3_300ID_ZORBAX_ZED_TT_03Apr2014	2114.76	12296.4	3	46093	188	789.377	28.7797
KVMIVITDGESHDSPDLEK	CTRL3	D:\AmpK_Pass2\AmpKPass3\CTRL3	CTRL3_300ID_ZORBAX_ZED_TT_03Apr2014	2114.76	12296.4	3	46093	147	645.51	26.3371
KVMIVITDGESHDSPDLEK	CTRL3	D:\AmpK_Pass2\AmpKPass3\CTRL3	CTRL3_300ID_ZORBAX_ZED_TT_03Apr2014	2114.76	12296.4	3	46093	211	953.875	25.7208
KVMIVITDGESHDSPDLEK	CTRL3	D:\AmpK_Pass2\AmpKPass3\CTRL3	CTRL3_300ID_ZORBAX_ZED_TT_03Apr2014	2114.76	12296.4	3	46093	19	276.153	24.7712
KVMIVITDGESHDSPDLEK	CTRL3	D:\AmpK_Pass2\AmpKPass3\CTRL3	CTRL3_300ID_ZORBAX_ZED_TT_03Apr2014	2114.76	12296.4	3	46093	249	1366.95	24.542
KVMIVITDGESHDSPDLEK	CTRL3	D:\AmpK_Pass2\AmpKPass3\CTRL3	CTRL3_300ID_ZORBAX_ZED_TT_03Apr2014	2114.76	12296.4	3	46093	58	402.297	23.4473
KVMIVITDGESHDSPDLEK	CTRL3	D:\AmpK_Pass2\AmpKPass3\CTRL3	CTRL3_300ID_ZORBAX_ZED_TT_03Apr2014	2114.76	12296.4	3	46093	152	653.442	22.6928
KVMIVITDGESHDSPDLEK	CTRL3	D:\AmpK_Pass2\AmpKPass3\CTRL3	CTRL3_300ID_ZORBAX_ZED_TT_03Apr2014	2114.76	12296.4	3	46093	14	265.017	22.6586
KVMIVITDGESHDSPDLEK	CTRL3	D:\AmpK_Pass2\AmpKPass3\CTRL3	CTRL3_300ID_ZORBAX_ZED_TT_03Apr2014	2114.76	12296.4	3	46093	169	683.348	22.3375
KVMIVITDGESHDSPDLEK	CTRL3	D:\AmpK_Pass2\AmpKPass3\CTRL3	CTRL3_300ID_ZORBAX_ZED_TT_03Apr2014	2114.76	12296.4	3	46093	217	997.804	21.9268
KVMIVITDGESHDSPDLEK	CTRL3	D:\AmpK_Pass2\AmpKPass3\CTRL3	CTRL3_300ID_ZORBAX_ZED_TT_03Apr2014	2114.76	12296.4	3	46093	232	1083.66	20.64
KVMIVITDGESHDSPDLEK	CTRL3	D:\AmpK_Pass2\AmpKPass3\CTRL3	CTRL3_300ID_ZORBAX_ZED_TT_03Apr2014	2114.76	12296.4	3	46093	174	697.137	19.1465
KVMIVITDGESHDSPDLEK	CTRL3	D:\AmpK_Pass2\AmpKPass3\CTRL3	CTRL3_300ID_ZORBAX_ZED_TT_03Apr2014	2114.76	12296.4	3	46093	7	232.057	18.8616
KVMIVITDGESHDSPDLEK	CTRL3	D:\AmpK_Pass2\AmpKPass3\CTRL3	CTRL3_300ID_ZORBAX_ZED_TT_03Apr2014	2114.76	12296.4	3	46093	53	385.324	17.8873
KVMIVITDGESHDSPDLEK	CTRL3	D:\AmpK_Pass2\AmpKPass3\CTRL3	CTRL3_300ID_ZORBAX_ZED_TT_03Apr2014	2114.76	12296.4	3	46093	113	565.301	16.3467
KVMIVITDGESHDSPDLEK	CTRL3	D:\AmpK_Pass2\AmpKPass3\CTRL3	CTRL3_300ID_ZORBAX_ZED_TT_03Apr2014	2114.76	12296.4	3	46093	63	419.319	16.2232
KVMIVITDGESHDSPDLEK	CTRL3	D:\AmpK_Pass2\AmpKPass3\CTRL3	CTRL3_300ID_ZORBAX_ZED_TT_03Apr2014	2114.76	12296.4	3	46093	131	605.5	16.1015
KVMIVITDGESHDSPDLEK	CTRL3	D:\AmpK_Pass2\AmpKPass3\CTRL3	CTRL3_300ID_ZORBAX_ZED_TT_03Apr2014	2114.76	12296.4	3	46093	50	377.274	15.6864
KVMIVITDGESHDSPDLEK	CTRL3	D:\AmpK_Pass2\AmpKPass3\CTRL3	CTRL3_300ID_ZORBAX_ZED_TT_03Apr2014	2114.76	12296.4	3	46093	145	641.679	15.6437
KVMIVITDGESHDSPDLEK	CTRL3	D:\AmpK_Pass2\AmpKPass3\CTRL3	CTRL3_300ID_ZORBAX_ZED_TT_03Apr2014	2114.76	12296.4	3	46093	83	471.465	15.6397
KVMIVITDGESHDSPDLEK	CTRL3	D:\AmpK_Pass2\AmpKPass3\CTRL3	CTRL3_300ID_ZORBAX_ZED_TT_03Apr2014	2114.76	12296.4	3	46093	206	922.611	15.487
KVMIVITDGESHDSPDLEK	CTRL3	D:\AmpK_Pass2\AmpKPass3\CTRL3	CTRL3_300ID_ZORBAX_ZED_TT_03Apr2014	2114.76	12296.4	3	46093	40	342.363	15.3339
KVMIVITDGESHDSPDLEK	CTRL3	D:\AmpK_Pass2\AmpKPass3\CTRL3	CTRL3_300ID_ZORBAX_ZED_TT_03Apr2014	2114.76	12296.4	3	46093	155	659.24	15.0414
KVMIVITDGESHDSPDLEK	CTRL3	D:\AmpK_Pass2\AmpKPass3\CTRL3	CTRL3_300ID_ZORBAX_ZED_TT_03Apr2014	2114.76	12296.4	3	46093	55	393.305	14.512
KVMIVITDGESHDSPDLEK	CTRL3	D:\AmpK_Pass2\AmpKPass3\CTRL3	CTRL3_300ID_ZORBAX_ZED_TT_03Apr2014	2114.76	12296.4	3	46093	112	560.064	14.0661
KVMIVITDGESHDSPDLEK	CTRL3	D:\AmpK_Pass2\AmpKPass3\CTRL3	CTRL3_300ID_ZORBAX_ZED_TT_03Apr2014	2114.76	12296.4	3	46093	35	333.236	13.9576
KVMIVITDGESHDSPDLEK	CTRL3	D:\AmpK_Pass2\AmpKPass3\CTRL3	CTRL3_300ID_ZORBAX_ZED_TT_03Apr2014	2114.76	12296.4	3	46093	124	587.722	13.5441
KVMIVITDGESHDSPDLEK	CTRL3	D:\AmpK_Pass2\AmpKPass3\CTRL3	CTRL3_300ID_ZORBAX_ZED_TT_03Apr2014	2114.76	12296.4	3	46093	216	995.852	13.509
KVMIVITDGESHDSPDLEK	CTRL3	D:\AmpK_Pass2\AmpKPass3\CTRL3	CTRL3_300ID_ZORBAX_ZED_TT_03Apr2014	2114.76	12296.4	3	46093	66	422.985	13.4102
KVMIVITDGESHDSPDLEK	CTRL3	D:\AmpK_Pass2\AmpKPass3\CTRL3	CTRL3_300ID_ZORBAX_ZED_TT_03Apr2014	2114.76	12296.4	3	46093	76	455.608	12.9948
KVMIVITDGESHDSPDLEK	CTRL3	D:\AmpK_Pass2\AmpKPass3\CTRL3	CTRL3_300ID_ZORBAX_ZED_TT_03Apr2014	2114.76	12296.4	3	46093	222	1010.72	12.9137
KVMIVITDGESHDSPDLEK	CTRL3	D:\AmpK_Pass2\AmpKPass3\CTRL3	CTRL3_300ID_ZORBAX_ZED_TT_03Apr2014	2114.76	12296.4	3	46093	225	1042.89	12.9121
KVMIVITDGESHDSPDLEK	CTRL3	D:\AmpK_Pass2\AmpKPass3\CTRL3	CTRL3_300ID_ZORBAX_ZED_TT_03Apr2014	2114.76	12296.4	3	46093	111	557.499	12.8767
KVMIVITDGESHDSPDLEK	CTRL3	D:\AmpK_Pass2\AmpKPass3\CTRL3	CTRL3_300ID_ZORBAX_ZED_TT_03Apr2014	2114.76	12296.4	3	46093	42	347.263	12.7451
KVMIVITDGESHDSPDLEK	CTRL3	D:\AmpK_Pass2\AmpKPass3\CTRL3	CTRL3_300ID_ZORBAX_ZED_TT_03Apr2014	2114.76	12296.4	3	46093	106	533.354	12.7159
KVMIVITDGESHDSPDLEK	CTRL3	D:\AmpK_Pass2\AmpKPass3\CTRL3	CTRL3_300ID_ZORBAX_ZED_TT_03Apr2014	2114.76	12296.4	3	46093	161	670.452	12.7079
KVMIVITDGESHDSPDLEK	CTRL3	D:\AmpK_Pass2\AmpKPass3\CTRL3	CTRL3_300ID_ZORBAX_ZED_TT_03Apr2014	2114.76	12296.4	3	46093	102	525.51	12.6423
KVMIVITDGESHDSPDLEK	CTRL3	D:\AmpK_Pass2\AmpKPass3\CTRL3	CTRL3_300ID_ZORBAX_ZED_TT_03Apr2014	2114.76	12296.4	3	46093	148	647.48	12.4955
KVMIVITDGESHDSPDLEK	CTRL3	D:\AmpK_Pass2\AmpKPass3\CTRL3	CTRL3_300ID_ZORBAX_ZED_TT_03Apr2014	2114.76	12296.4	3	46093	97	506.936	12.2168
KVMIVITDGESHDSPDLEK	CTRL3	D:\AmpK_Pass2\AmpKPass3\CTRL3	CTRL3_300ID_ZORBAX_ZED_TT_03Apr2014	2114.76	12296.4	3	46093	157	662.504	11.8649
KVMIVITDGESHDSPDLEK	CTRL3	D:\AmpK_Pass2\AmpKPass3\CTRL3	CTRL3_300ID_ZORBAX_ZED_TT_03Apr2014	2114.76	12296.4	3	46093	133	607.713	11.8406
KVMIVITDGESHDSPDLEK	CTRL3	D:\AmpK_Pass2\AmpKPass3\CTRL3	CTRL3_300ID_ZORBAX_ZED_TT_03Apr2014	2114.76	12296.4	3	46093	175	699.537	11.4877
KVMIVITDGESHDSPDLEK	CTRL3	D:\AmpK_Pass2\AmpKPass3\CTRL3	CTRL3_300ID_ZORBAX_ZED_TT_03Apr2014	2114.76	12296.4	3	46093	96	505.4	11.4635
KVMIVITDGESHDSPDLEK	CTRL3	D:\AmpK_Pass2\AmpKPass3\CTRL3	CTRL3_300ID_ZORBAX_ZED_TT_03Apr2014	2114.76	12296.4	3	46093	87	483.348	11.2986
KVMIVITDGESHDSPDLEK	CTRL3	D:\AmpK_Pass2\AmpKPass3\CTRL3	CTRL3_300ID_ZORBAX_ZED_TT_03Apr2014	2114.76	12296.4	3	46093	108	547.778	11.0942
KVMIVITDGESHDSPDLEK	CTRL3	D:\AmpK_Pass2\AmpKPass3\CTRL3	CTRL3_300ID_ZORBAX_ZED_TT_03Apr2014	2114.76	12296.4	3	46093	107	543.553	11.0847
KVMIVITDGESHDSPDLEK	CTRL3	D:\AmpK_Pass2\AmpKPass3\CTRL3	CTRL3_300ID_ZORBAX_ZED_TT_03Apr2014	2114.76	12296.4	3	46093	114	570.376	10.8459
KVMIVITDGESHDSPDLEK	CTRL3	D:\AmpK_Pass2\AmpKPass3\CTRL3	CTRL3_300ID_ZORBAX_ZED_TT_03Apr2014	2114.76	12296.4	3	46093	122	580.546	10.2652
KVMIVITDGESHDSPDLEK	CTRL3	D:\AmpK_Pass2\AmpKPass3\CTRL3	CTRL3_300ID_ZORBAX_ZED_TT_03Apr2014	2114.76	12296.4	3	46093	68	425.208	10.2248
KVMIVITDGESHDSPDLEK	CTRL3	D:\AmpK_Pass2\AmpKPass3\CTRL3	CTRL3_300ID_ZORBAX_ZED_TT_03Apr2014	2114.76	12296.4	3	46093	146	643.4	10.2075
KVMIVITDGESHDSPDLEK	CTRL3	D:\AmpK_Pass2\AmpKPass3\CTRL3	CTRL3_300ID_ZORBAX_ZED_TT_03Apr2014	2114.76	12296.4	3	46093	109	548.546	10.175
KVMIVITDGESHDSPDLEK	CTRL3	D:\AmpK_Pass2\AmpKPass3\CTRL3	CTRL3_300ID_ZORBAX_ZED_TT_03Apr2014	2114.76	12296.4	3	46093	81	468.387	9.92576
KVMIVITDGESHDSPDLEK	CTRL3	D:\AmpK_Pass2\AmpKPass3\CTRL3	CTRL3_300ID_ZORBAX_ZED_TT_03Apr2014	2114.76	12296.4	3	46093	231	1067.82	9.31998
KVMIVITDGESHDSPDLEK	CTRL3	D:\AmpK_Pass2\AmpKPass3\CTRL3	CTRL3_300ID_ZORBAX_ZED_TT_03Apr2014	2114.76	12296.4	3	46093	236	1098.83	9.30934
KVMIVITDGESHDSPDLEK	CTRL3	D:\AmpK_Pass2\AmpKPass3\CTRL3	CTRL3_300ID_ZORBAX_ZED_TT_03Apr2014	2114.76	12296.4	3	46093	10	252.514	9.13266
KVMIVITDGESHDSPDLEK	CTRL3	D:\AmpK_Pass2\AmpKPass3\CTRL3	CTRL3_300ID_ZORBAX_ZED_TT_03Apr2014	2114.76	12296.4	3	46093	166	678.6	9.00806
KVMIVITDGESHDSPDLEK	CTRL3	D:\AmpK_Pass2\AmpKPass3\CTRL3	CTRL3_300ID_ZORBAX_ZED_TT_03Apr2014	2114.76	12296.4	3	46093	54	386.291	8.96068
KVMIVITDGESHDSPDLEK	CTRL3	D:\AmpK_Pass2\AmpKPass3\CTRL3	CTRL3_300ID_ZORBAX_ZED_TT_03Apr2014	2114.76	12296.4	3	46093	129	602.329	8.76012
KVMIVITDGESHDSPDLEK	CTRL3	D:\AmpK_Pass2\AmpKPass3\CTRL3	CTRL3_300ID_ZORBAX_ZED_TT_03Apr2014	2114.76	12296.4	3	46093	59	403.267	8.5996
KVMIVITDGESHDSPDLEK	CTRL3	D:\AmpK_Pass2\AmpKPass3\CTRL3	CTRL3_300ID_ZORBAX_ZED_TT_03Apr2014	2114.76	12296.4	3	46093	128	601.563	8.49987
KVMIVITDGESHDSPDLEK	CTRL3	D:\AmpK_Pass2\AmpKPass3\CTRL3	CTRL3_300ID_ZORBAX_ZED_TT_03Apr2014	2114.76	12296.4	3	46093	22	283.144	8.39795
KVMIVITDGESHDSPDLEK	CTRL3	D:\AmpK_Pass2\AmpKPass3\CTRL3	CTRL3_300ID_ZORBAX_ZED_TT_03Apr2014	2114.76	12296.4	3	46093	201	879.193	8.39635
KVMIVITDGESHDSPDLEK	CTRL3	D:\AmpK_Pass2\AmpKPass3\CTRL3	CTRL3_300ID_ZORBAX_ZED_TT_03Apr2014	2114.76	12296.4	3	46093	244	1219.22	8.24373
KVMIVITDGESHDSPDLEK	CTRL3	D:\AmpK_Pass2\AmpKPass3\CTRL3	CTRL3_300ID_ZORBAX_ZED_TT_03Apr2014	2114.76	12296.4	3	46093	26	298.294	8.19637
KVMIVITDGESHDSPDLEK	CTRL3	D:\AmpK_Pass2\AmpKPass3\CTRL3	CTRL3_300ID_ZORBAX_ZED_TT_03Apr2014	2114.76	12296.4	3	46093	164	676.087	8.11623
KVMIVITDGESHDSPDLEK	CTRL3	D:\AmpK_Pass2\AmpKPass3\CTRL3	CTRL3_300ID_ZORBAX_ZED_TT_03Apr2014	2114.76	12296.4	3	46093	212	954.917	8.107
KVMIVITDGESHDSPDLEK	CTRL3	D:\AmpK_Pass2\AmpKPass3\CTRL3	CTRL3_300ID_ZORBAX_ZED_TT_03Apr2014	2114.76	12296.4	3	46093	219	1007.41	8.04966
KVMIVITDGESHDSPDLEK	CTRL3	D:\AmpK_Pass2\AmpKPass3\CTRL3	CTRL3_300ID_ZORBAX_ZED_TT_03Apr2014	2114.76	12296.4	3	46093	183	746.406	8.04824
KVMIVITDGESHDSPDLEK	CTRL3	D:\AmpK_Pass2\AmpKPass3\CTRL3	CTRL3_300ID_ZORBAX_ZED_TT_03Apr2014	2114.76	12296.4	3	46093	92	492.721	8.02642
KVMIVITDGESHDSPDLEK	CTRL3	D:\AmpK_Pass2\AmpKPass3\CTRL3	CTRL3_300ID_ZORBAX_ZED_TT_03Apr2014	2114.76	12296.4	3	46093	132	606.238	7.99672
KVMIVITDGESHDSPDLEK	CTRL3	D:\AmpK_Pass2\AmpKPass3\CTRL3	CTRL3_300ID_ZORBAX_ZED_TT_03Apr2014	2114.76	12296.4	3	46093	125	589.226	7.98947
KVMIVITDGESHDSPDLEK	CTRL3	D:\AmpK_Pass2\AmpKPass3\CTRL3	CTRL3_300ID_ZORBAX_ZED_TT_03Apr2014	2114.76	12296.4	3	46093	57	401.144	7.87669
KVMIVITDGESHDSPDLEK	CTRL3	D:\AmpK_Pass2\AmpKPass3\CTRL3	CTRL3_300ID_ZORBAX_ZED_TT_03Apr2014	2114.76	12296.4	3	46093	159	666.743	7.82265
KVMIVITDGESHDSPDLEK	CTRL3	D:\AmpK_Pass2\AmpKPass3\CTRL3	CTRL3_300ID_ZORBAX_ZED_TT_03Apr2014	2114.76	12296.4	3	46093	197	861.548	7.78873
KVMIVITDGESHDSPDLEK	CTRL3	D:\AmpK_Pass2\AmpKPass3\CTRL3	CTRL3_300ID_ZORBAX_ZED_TT_03Apr2014	2114.76	12296.4	3	46093	28	307.215	7.58413
KVMIVITDGESHDSPDLEK	CTRL3	D:\AmpK_Pass2\AmpKPass3\CTRL3	CTRL3_300ID_ZORBAX_ZED_TT_03Apr2014	2114.76	12296.4	3	46093	156	660.734	7.57264
KVMIVITDGESHDSPDLEK	CTRL3	D:\AmpK_Pass2\AmpKPass3\CTRL3	CTRL3_300ID_ZORBAX_ZED_TT_03Apr2014	2114.76	12296.4	3	46093	43	347.933	7.41445
KVMIVITDGESHDSPDLEK	CTRL3	D:\AmpK_Pass2\AmpKPass3\CTRL3	CTRL3_300ID_ZORBAX_ZED_TT_03Apr2014	2114.76	12296.4	3	46093	168	682.162	7.39383
KVMIVITDGESHDSPDLEK	CTRL3	D:\AmpK_Pass2\AmpKPass3\CTRL3	CTRL3_300ID_ZORBAX_ZED_TT_03Apr2014	2114.76	12296.4	3	46093	181	743.64	7.35336
KVMIVITDGESHDSPDLEK	CTRL3	D:\AmpK_Pass2\AmpKPass3\CTRL3	CTRL3_300ID_ZORBAX_ZED_TT_03Apr2014	2114.76	12296.4	3	46093	245	1261.88	7.33592
KVMIVITDGESHDSPDLEK	CTRL3	D:\AmpK_Pass2\AmpKPass3\CTRL3	CTRL3_300ID_ZORBAX_ZED_TT_03Apr2014	2114.76	12296.4	3	46093	34	331.388	7.26314
KVMIVITDGESHDSPDLEK	CTRL3	D:\AmpK_Pass2\AmpKPass3\CTRL3	CTRL3_300ID_ZORBAX_ZED_TT_03Apr2014	2114.76	12296.4	3	46093	204	920.856	7.21162
KVMIVITDGESHDSPDLEK	CTRL3	D:\AmpK_Pass2\AmpKPass3\CTRL3	CTRL3_300ID_ZORBAX_ZED_TT_03Apr2014	2114.76	12296.4	3	46093	16	268.138	7.18809
KVMIVITDGESHDSPDLEK	CTRL3	D:\AmpK_Pass2\AmpKPass3\CTRL3	CTRL3_300ID_ZORBAX_ZED_TT_03Apr2014	2114.76	12296.4	3	46093	185	766.264	7.09248
KVMIVITDGESHDSPDLEK	CTRL3	D:\AmpK_Pass2\AmpKPass3\CTRL3	CTRL3_300ID_ZORBAX_ZED_TT_03Apr2014	2114.76	12296.4	3	46093	154	657.582	7.0692
KVMIVITDGESHDSPDLEK	CTRL3	D:\AmpK_Pass2\AmpKPass3\CTRL3	CTRL3_300ID_ZORBAX_ZED_TT_03Apr2014	2114.76	12296.4	3	46093	18	274.241	7.03819
KVMIVITDGESHDSPDLEK	CTRL3	D:\AmpK_Pass2\AmpKPass3\CTRL3	CTRL3_300ID_ZORBAX_ZED_TT_03Apr2014	2114.76	12296.4	3	46093	151	652.347	6.95959
KVMIVITDGESHDSPDLEK	CTRL3	D:\AmpK_Pass2\AmpKPass3\CTRL3	CTRL3_300ID_ZORBAX_ZED_TT_03Apr2014	2114.76	12296.4	3	46093	110	549.415	6.86714
KVMIVITDGESHDSPDLEK	CTRL3	D:\AmpK_Pass2\AmpKPass3\CTRL3	CTRL3_300ID_ZORBAX_ZED_TT_03Apr2014	2114.76	12296.4	3	46093	27	305.094	6.78713
KVMIVITDGESHDSPDLEK	CTRL3	D:\AmpK_Pass2\AmpKPass3\CTRL3	CTRL3_300ID_ZORBAX_ZED_TT_03Apr2014	2114.76	12296.4	3	46093	234	1086.5	6.65941
KVMIVITDGESHDSPDLEK	CTRL3	D:\AmpK_Pass2\AmpKPass3\CTRL3	CTRL3_300ID_ZORBAX_ZED_TT_03Apr2014	2114.76	12296.4	3	46093	239	1130.85	6.61321
KVMIVITDGESHDSPDLEK	CTRL3	D:\AmpK_Pass2\AmpKPass3\CTRL3	CTRL3_300ID_ZORBAX_ZED_TT_03Apr2014	2114.76	12296.4	3	46093	144	639.539	6.5917
KVMIVITDGESHDSPDLEK	CTRL3	D:\AmpK_Pass2\AmpKPass3\CTRL3	CTRL3_300ID_ZORBAX_ZED_TT_03Apr2014	2114.76	12296.4	3	46093	203	919.866	6.58199
KVMIVITDGESHDSPDLEK	CTRL3	D:\AmpK_Pass2\AmpKPass3\CTRL3	CTRL3_300ID_ZORBAX_ZED_TT_03Apr2014	2114.76	12296.4	3	46093	23	291.11	6.49588
KVMIVITDGESHDSPDLEK	CTRL3	D:\AmpK_Pass2\AmpKPass3\CTRL3	CTRL3_300ID_ZORBAX_ZED_TT_03Apr2014	2114.76	12296.4	3	46093	100	514.521	6.48303
KVMIVITDGESHDSPDLEK	CTRL3	D:\AmpK_Pass2\AmpKPass3\CTRL3	CTRL3_300ID_ZORBAX_ZED_TT_03Apr2014	2114.76	12296.4	3	46093	15	267.143	6.4464
KVMIVITDGESHDSPDLEK	CTRL3	D:\AmpK_Pass2\AmpKPass3\CTRL3	CTRL3_300ID_ZORBAX_ZED_TT_03Apr2014	2114.76	12296.4	3	46093	31	314.423	6.40315
KVMIVITDGESHDSPDLEK	CTRL3	D:\AmpK_Pass2\AmpKPass3\CTRL3	CTRL3_300ID_ZORBAX_ZED_TT_03Apr2014	2114.76	12296.4	3	46093	126	596.693	6.33504
KVMIVITDGESHDSPDLEK	CTRL3	D:\AmpK_Pass2\AmpKPass3\CTRL3	CTRL3_300ID_ZORBAX_ZED_TT_03Apr2014	2114.76	12296.4	3	46093	160	669.831	6.2472
KVMIVITDGESHDSPDLEK	CTRL3	D:\AmpK_Pass2\AmpKPass3\CTRL3	CTRL3_300ID_ZORBAX_ZED_TT_03Apr2014	2114.76	12296.4	3	46093	118	576.597	6.19371
KVMIVITDGESHDSPDLEK	CTRL3	D:\AmpK_Pass2\AmpKPass3\CTRL3	CTRL3_300ID_ZORBAX_ZED_TT_03Apr2014	2114.76	12296.4	3	46093	20	281.282	6.19012
KVMIVITDGESHDSPDLEK	CTRL3	D:\AmpK_Pass2\AmpKPass3\CTRL3	CTRL3_300ID_ZORBAX_ZED_TT_03Apr2014	2114.76	12296.4	3	46093	235	1098.21	6.17791
KVMIVITDGESHDSPDLEK	CTRL3	D:\AmpK_Pass2\AmpKPass3\CTRL3	CTRL3_300ID_ZORBAX_ZED_TT_03Apr2014	2114.76	12296.4	3	46093	237	1127.7	6.14349
KVMIVITDGESHDSPDLEK	CTRL3	D:\AmpK_Pass2\AmpKPass3\CTRL3	CTRL3_300ID_ZORBAX_ZED_TT_03Apr2014	2114.76	12296.4	3	46093	170	684.152	6.09492
KVMIVITDGESHDSPDLEK	CTRL3	D:\AmpK_Pass2\AmpKPass3\CTRL3	CTRL3_300ID_ZORBAX_ZED_TT_03Apr2014	2114.76	12296.4	3	46093	134	611.522	5.98604
KVMIVITDGESHDSPDLEK	CTRL3	D:\AmpK_Pass2\AmpKPass3\CTRL3	CTRL3_300ID_ZORBAX_ZED_TT_03Apr2014	2114.76	12296.4	3	46093	127	600.617	5.97059
KVMIVITDGESHDSPDLEK	CTRL3	D:\AmpK_Pass2\AmpKPass3\CTRL3	CTRL3_300ID_ZORBAX_ZED_TT_03Apr2014	2114.76	12296.4	3	46093	84	473.292	5.94363
KVMIVITDGESHDSPDLEK	CTRL3	D:\AmpK_Pass2\AmpKPass3\CTRL3	CTRL3_300ID_ZORBAX_ZED_TT_03Apr2014	2114.76	12296.4	3	46093	32	320.061	5.88137
KVMIVITDGESHDSPDLEK	CTRL3	D:\AmpK_Pass2\AmpKPass3\CTRL3	CTRL3_300ID_ZORBAX_ZED_TT_03Apr2014	2114.76	12296.4	3	46093	104	529.338	5.88076
KVMIVITDGESHDSPDLEK	CTRL3	D:\AmpK_Pass2\AmpKPass3\CTRL3	CTRL3_300ID_ZORBAX_ZED_TT_03Apr2014	2114.76	12296.4	3	46093	139	625.148	5.84002
KVMIVITDGESHDSPDLEK	CTRL3	D:\AmpK_Pass2\AmpKPass3\CTRL3	CTRL3_300ID_ZORBAX_ZED_TT_03Apr2014	2114.76	12296.4	3	46093	150	649.312	5.83789
KVMIVITDGESHDSPDLEK	CTRL3	D:\AmpK_Pass2\AmpKPass3\CTRL3	CTRL3_300ID_ZORBAX_ZED_TT_03Apr2014	2114.76	12296.4	3	46093	227	1052	5.78983
KVMIVITDGESHDSPDLEK	CTRL3	D:\AmpK_Pass2\AmpKPass3\CTRL3	CTRL3_300ID_ZORBAX_ZED_TT_03Apr2014	2114.76	12296.4	3	46093	5	221.055	5.67986
KVMIVITDGESHDSPDLEK	CTRL3	D:\AmpK_Pass2\AmpKPass3\CTRL3	CTRL3_300ID_ZORBAX_ZED_TT_03Apr2014	2114.76	12296.4	3	46093	65	421.359	5.59649
KVMIVITDGESHDSPDLEK	CTRL3	D:\AmpK_Pass2\AmpKPass3\CTRL3	CTRL3_300ID_ZORBAX_ZED_TT_03Apr2014	2114.76	12296.4	3	46093	86	482.063	5.45878
KVMIVITDGESHDSPDLEK	CTRL3	D:\AmpK_Pass2\AmpKPass3\CTRL3	CTRL3_300ID_ZORBAX_ZED_TT_03Apr2014	2114.76	12296.4	3	46093	46	357.196	5.43797
KVMIVITDGESHDSPDLEK	CTRL3	D:\AmpK_Pass2\AmpKPass3\CTRL3	CTRL3_300ID_ZORBAX_ZED_TT_03Apr2014	2114.76	12296.4	3	46093	191	814.685	5.34586
KVMIVITDGESHDSPDLEK	CTRL3	D:\AmpK_Pass2\AmpKPass3\CTRL3	CTRL3_300ID_ZORBAX_ZED_TT_03Apr2014	2114.76	12296.4	3	46093	82	469.464	5.32211
KVMIVITDGESHDSPDLEK	CTRL3	D:\AmpK_Pass2\AmpKPass3\CTRL3	CTRL3_300ID_ZORBAX_ZED_TT_03Apr2014	2114.76	12296.4	3	46093	38	337.658	5.26483
KVMIVITDGESHDSPDLEK	CTRL3	D:\AmpK_Pass2\AmpKPass3\CTRL3	CTRL3_300ID_ZORBAX_ZED_TT_03Apr2014	2114.76	12296.4	3	46093	11	253.215	5.22785
KVMIVITDGESHDSPDLEK	CTRL3	D:\AmpK_Pass2\AmpKPass3\CTRL3	CTRL3_300ID_ZORBAX_ZED_TT_03Apr2014	2114.76	12296.4	3	46093	186	771.721	5.21233
KVMIVITDGESHDSPDLEK	CTRL3	D:\AmpK_Pass2\AmpKPass3\CTRL3	CTRL3_300ID_ZORBAX_ZED_TT_03Apr2014	2114.76	12296.4	3	46093	158	663.353	5.18478
KVMIVITDGESHDSPDLEK	CTRL3	D:\AmpK_Pass2\AmpKPass3\CTRL3	CTRL3_300ID_ZORBAX_ZED_TT_03Apr2014	2114.76	12296.4	3	46093	94	499.615	5.17309
KVMIVITDGESHDSPDLEK	CTRL3	D:\AmpK_Pass2\AmpKPass3\CTRL3	CTRL3_300ID_ZORBAX_ZED_TT_03Apr2014	2114.76	12296.4	3	46093	135	612.486	5.06842
KVMIVITDGESHDSPDLEK	CTRL3	D:\AmpK_Pass2\AmpKPass3\CTRL3	CTRL3_300ID_ZORBAX_ZED_TT_03Apr2014	2114.76	12296.4	3	46093	192	821.638	4.93861
KVMIVITDGESHDSPDLEK	CTRL3	D:\AmpK_Pass2\AmpKPass3\CTRL3	CTRL3_300ID_ZORBAX_ZED_TT_03Apr2014	2114.76	12296.4	3	46093	13	259.205	4.9362
KVMIVITDGESHDSPDLEK	CTRL3	D:\AmpK_Pass2\AmpKPass3\CTRL3	CTRL3_300ID_ZORBAX_ZED_TT_03Apr2014	2114.76	12296.4	3	46093	173	688.585	4.885
KVMIVITDGESHDSPDLEK	CTRL3	D:\AmpK_Pass2\AmpKPass3\CTRL3	CTRL3_300ID_ZORBAX_ZED_TT_03Apr2014	2114.76	12296.4	3	46093	117	573.418	4.84174
KVMIVITDGESHDSPDLEK	CTRL3	D:\AmpK_Pass2\AmpKPass3\CTRL3	CTRL3_300ID_ZORBAX_ZED_TT_03Apr2014	2114.76	12296.4	3	46093	56	397.188	4.79494
KVMIVITDGESHDSPDLEK	CTRL3	D:\AmpK_Pass2\AmpKPass3\CTRL3	CTRL3_300ID_ZORBAX_ZED_TT_03Apr2014	2114.76	12296.4	3	46093	72	440.098	4.79007
KVMIVITDGESHDSPDLEK	CTRL3	D:\AmpK_Pass2\AmpKPass3\CTRL3	CTRL3_300ID_ZORBAX_ZED_TT_03Apr2014	2114.76	12296.4	3	46093	165	677.367	4.78417
KVMIVITDGESHDSPDLEK	CTRL3	D:\AmpK_Pass2\AmpKPass3\CTRL3	CTRL3_300ID_ZORBAX_ZED_TT_03Apr2014	2114.76	12296.4	3	46093	171	685.457	4.77406
KVMIVITDGESHDSPDLEK	CTRL3	D:\AmpK_Pass2\AmpKPass3\CTRL3	CTRL3_300ID_ZORBAX_ZED_TT_03Apr2014	2114.76	12296.4	3	46093	180	727.667	4.62427
KVMIVITDGESHDSPDLEK	CTRL3	D:\AmpK_Pass2\AmpKPass3\CTRL3	CTRL3_300ID_ZORBAX_ZED_TT_03Apr2014	2114.76	12296.4	3	46093	77	457.465	4.54425
KVMIVITDGESHDSPDLEK	CTRL3	D:\AmpK_Pass2\AmpKPass3\CTRL3	CTRL3_300ID_ZORBAX_ZED_TT_03Apr2014	2114.76	12296.4	3	46093	39	341.342	4.5431
KVMIVITDGESHDSPDLEK	CTRL3	D:\AmpK_Pass2\AmpKPass3\CTRL3	CTRL3_300ID_ZORBAX_ZED_TT_03Apr2014	2114.76	12296.4	3	46093	3	210.001	4.54115
KVMIVITDGESHDSPDLEK	CTRL3	D:\AmpK_Pass2\AmpKPass3\CTRL3	CTRL3_300ID_ZORBAX_ZED_TT_03Apr2014	2114.76	12296.4	3	46093	167	679.354	4.5401
KVMIVITDGESHDSPDLEK	CTRL3	D:\AmpK_Pass2\AmpKPass3\CTRL3	CTRL3_300ID_ZORBAX_ZED_TT_03Apr2014	2114.76	12296.4	3	46093	116	572.586	4.46768
KVMIVITDGESHDSPDLEK	CTRL3	D:\AmpK_Pass2\AmpKPass3\CTRL3	CTRL3_300ID_ZORBAX_ZED_TT_03Apr2014	2114.76	12296.4	3	46093	89	487.449	4.37818
KVMIVITDGESHDSPDLEK	CTRL3	D:\AmpK_Pass2\AmpKPass3\CTRL3	CTRL3_300ID_ZORBAX_ZED_TT_03Apr2014	2114.76	12296.4	3	46093	30	311.163	4.3412
KVMIVITDGESHDSPDLEK	CTRL3	D:\AmpK_Pass2\AmpKPass3\CTRL3	CTRL3_300ID_ZORBAX_ZED_TT_03Apr2014	2114.76	12296.4	3	46093	130	603.385	4.33378
KVMIVITDGESHDSPDLEK	CTRL3	D:\AmpK_Pass2\AmpKPass3\CTRL3	CTRL3_300ID_ZORBAX_ZED_TT_03Apr2014	2114.76	12296.4	3	46093	85	477.377	4.32922
KVMIVITDGESHDSPDLEK	CTRL3	D:\AmpK_Pass2\AmpKPass3\CTRL3	CTRL3_300ID_ZORBAX_ZED_TT_03Apr2014	2114.76	12296.4	3	46093	90	489.556	4.20089
KVMIVITDGESHDSPDLEK	CTRL3	D:\AmpK_Pass2\AmpKPass3\CTRL3	CTRL3_300ID_ZORBAX_ZED_TT_03Apr2014	2114.76	12296.4	3	46093	95	501.457	4.17888
KVMIVITDGESHDSPDLEK	CTRL3	D:\AmpK_Pass2\AmpKPass3\CTRL3	CTRL3_300ID_ZORBAX_ZED_TT_03Apr2014	2114.76	12296.4	3	46093	187	786.818	4.13596
KVMIVITDGESHDSPDLEK	CTRL3	D:\AmpK_Pass2\AmpKPass3\CTRL3	CTRL3_300ID_ZORBAX_ZED_TT_03Apr2014	2114.76	12296.4	3	46093	73	442.396	4.07989
KVMIVITDGESHDSPDLEK	CTRL3	D:\AmpK_Pass2\AmpKPass3\CTRL3	CTRL3_300ID_ZORBAX_ZED_TT_03Apr2014	2114.76	12296.4	3	46093	223	1025.19	4.03079
KVMIVITDGESHDSPDLEK	CTRL3	D:\AmpK_Pass2\AmpKPass3\CTRL3	CTRL3_300ID_ZORBAX_ZED_TT_03Apr2014	2114.76	12296.4	3	46093	193	829.737	4.01696
KVMIVITDGESHDSPDLEK	CTRL3	D:\AmpK_Pass2\AmpKPass3\CTRL3	CTRL3_300ID_ZORBAX_ZED_TT_03Apr2014	2114.76	12296.4	3	46093	207	936.912	3.96856
KVMIVITDGESHDSPDLEK	CTRL3	D:\AmpK_Pass2\AmpKPass3\CTRL3	CTRL3_300ID_ZORBAX_ZED_TT_03Apr2014	2114.76	12296.4	3	46093	177	702.624	3.94021
KVMIVITDGESHDSPDLEK	CTRL3	D:\AmpK_Pass2\AmpKPass3\CTRL3	CTRL3_300ID_ZORBAX_ZED_TT_03Apr2014	2114.76	12296.4	3	46093	247	1364.68	3.93992
KVMIVITDGESHDSPDLEK	CTRL3	D:\AmpK_Pass2\AmpKPass3\CTRL3	CTRL3_300ID_ZORBAX_ZED_TT_03Apr2014	2114.76	12296.4	3	46093	103	527.536	3.93625
KVMIVITDGESHDSPDLEK	CTRL3	D:\AmpK_Pass2\AmpKPass3\CTRL3	CTRL3_300ID_ZORBAX_ZED_TT_03Apr2014	2114.76	12296.4	3	46093	45	352.455	3.93386
KVMIVITDGESHDSPDLEK	CTRL3	D:\AmpK_Pass2\AmpKPass3\CTRL3	CTRL3_300ID_ZORBAX_ZED_TT_03Apr2014	2114.76	12296.4	3	46093	198	873.668	3.83069
KVMIVITDGESHDSPDLEK	CTRL3	D:\AmpK_Pass2\AmpKPass3\CTRL3	CTRL3_300ID_ZORBAX_ZED_TT_03Apr2014	2114.76	12296.4	3	46093	9	243.265	3.79908
KVMIVITDGESHDSPDLEK	CTRL3	D:\AmpK_Pass2\AmpKPass3\CTRL3	CTRL3_300ID_ZORBAX_ZED_TT_03Apr2014	2114.76	12296.4	3	46093	78	461.212	3.72624
KVMIVITDGESHDSPDLEK	CTRL3	D:\AmpK_Pass2\AmpKPass3\CTRL3	CTRL3_300ID_ZORBAX_ZED_TT_03Apr2014	2114.76	12296.4	3	46093	88	485.418	3.66984
KVMIVITDGESHDSPDLEK	CTRL3	D:\AmpK_Pass2\AmpKPass3\CTRL3	CTRL3_300ID_ZORBAX_ZED_TT_03Apr2014	2114.76	12296.4	3	46093	29	309.378	3.63357
KVMIVITDGESHDSPDLEK	CTRL3	D:\AmpK_Pass2\AmpKPass3\CTRL3	CTRL3_300ID_ZORBAX_ZED_TT_03Apr2014	2114.76	12296.4	3	46093	153	655.61	3.53205
KVMIVITDGESHDSPDLEK	CTRL3	D:\AmpK_Pass2\AmpKPass3\CTRL3	CTRL3_300ID_ZORBAX_ZED_TT_03Apr2014	2114.76	12296.4	3	46093	120	578.139	3.52991
KVMIVITDGESHDSPDLEK	CTRL3	D:\AmpK_Pass2\AmpKPass3\CTRL3	CTRL3_300ID_ZORBAX_ZED_TT_03Apr2014	2114.76	12296.4	3	46093	36	334.628	3.52505
KVMIVITDGESHDSPDLEK	CTRL3	D:\AmpK_Pass2\AmpKPass3\CTRL3	CTRL3_300ID_ZORBAX_ZED_TT_03Apr2014	2114.76	12296.4	3	46093	62	412.065	3.47573
KVMIVITDGESHDSPDLEK	CTRL3	D:\AmpK_Pass2\AmpKPass3\CTRL3	CTRL3_300ID_ZORBAX_ZED_TT_03Apr2014	2114.76	12296.4	3	46093	6	230.09	3.34029
KVMIVITDGESHDSPDLEK	CTRL3	D:\AmpK_Pass2\AmpKPass3\CTRL3	CTRL3_300ID_ZORBAX_ZED_TT_03Apr2014	2114.76	12296.4	3	46093	184	761.723	3.329
KVMIVITDGESHDSPDLEK	CTRL3	D:\AmpK_Pass2\AmpKPass3\CTRL3	CTRL3_300ID_ZORBAX_ZED_TT_03Apr2014	2114.76	12296.4	3	46093	240	1171.19	3.18512
KVMIVITDGESHDSPDLEK	CTRL3	D:\AmpK_Pass2\AmpKPass3\CTRL3	CTRL3_300ID_ZORBAX_ZED_TT_03Apr2014	2114.76	12296.4	3	46093	199	875.63	3.17836
KVMIVITDGESHDSPDLEK	CTRL3	D:\AmpK_Pass2\AmpKPass3\CTRL3	CTRL3_300ID_ZORBAX_ZED_TT_03Apr2014	2114.76	12296.4	3	46093	93	495.02	3.1762
KVMIVITDGESHDSPDLEK	CTRL3	D:\AmpK_Pass2\AmpKPass3\CTRL3	CTRL3_300ID_ZORBAX_ZED_TT_03Apr2014	2114.76	12296.4	3	46093	98	508.945	3.17132
KVMIVITDGESHDSPDLEK	CTRL3	D:\AmpK_Pass2\AmpKPass3\CTRL3	CTRL3_300ID_ZORBAX_ZED_TT_03Apr2014	2114.76	12296.4	3	46093	44	349.357	3.16845
KVMIVITDGESHDSPDLEK	CTRL3	D:\AmpK_Pass2\AmpKPass3\CTRL3	CTRL3_300ID_ZORBAX_ZED_TT_03Apr2014	2114.76	12296.4	3	46093	142	633.711	3.16101
KVMIVITDGESHDSPDLEK	CTRL3	D:\AmpK_Pass2\AmpKPass3\CTRL3	CTRL3_300ID_ZORBAX_ZED_TT_03Apr2014	2114.76	12296.4	3	46093	80	466.934	3.13315
KVMIVITDGESHDSPDLEK	CTRL3	D:\AmpK_Pass2\AmpKPass3\CTRL3	CTRL3_300ID_ZORBAX_ZED_TT_03Apr2014	2114.76	12296.4	3	46093	71	436.659	3.13258
KVMIVITDGESHDSPDLEK	CTRL3	D:\AmpK_Pass2\AmpKPass3\CTRL3	CTRL3_300ID_ZORBAX_ZED_TT_03Apr2014	2114.76	12296.4	3	46093	136	613.75	3.13171
KVMIVITDGESHDSPDLEK	CTRL3	D:\AmpK_Pass2\AmpKPass3\CTRL3	CTRL3_300ID_ZORBAX_ZED_TT_03Apr2014	2114.76	12296.4	3	46093	60	407.241	3.1287
KVMIVITDGESHDSPDLEK	CTRL3	D:\AmpK_Pass2\AmpKPass3\CTRL3	CTRL3_300ID_ZORBAX_ZED_TT_03Apr2014	2114.76	12296.4	3	46093	196	849.055	3.12777
KVMIVITDGESHDSPDLEK	CTRL3	D:\AmpK_Pass2\AmpKPass3\CTRL3	CTRL3_300ID_ZORBAX_ZED_TT_03Apr2014	2114.76	12296.4	3	46093	226	1050.72	3.00273
KVMIVITDGESHDSPDLEK	CTRL3	D:\AmpK_Pass2\AmpKPass3\CTRL3	CTRL3_300ID_ZORBAX_ZED_TT_03Apr2014	2114.76	12296.4	3	46093	138	621.578	2.99246
KVMIVITDGESHDSPDLEK	CTRL3	D:\AmpK_Pass2\AmpKPass3\CTRL3	CTRL3_300ID_ZORBAX_ZED_TT_03Apr2014	2114.76	12296.4	3	46093	246	1271.69	2.98296
KVMIVITDGESHDSPDLEK	CTRL3	D:\AmpK_Pass2\AmpKPass3\CTRL3	CTRL3_300ID_ZORBAX_ZED_TT_03Apr2014	2114.76	12296.4	3	46093	8	235.106	2.93264
KVMIVITDGESHDSPDLEK	CTRL3	D:\AmpK_Pass2\AmpKPass3\CTRL3	CTRL3_300ID_ZORBAX_ZED_TT_03Apr2014	2114.76	12296.4	3	46093	210	953.021	2.9303
KVMIVITDGESHDSPDLEK	CTRL3	D:\AmpK_Pass2\AmpKPass3\CTRL3	CTRL3_300ID_ZORBAX_ZED_TT_03Apr2014	2114.76	12296.4	3	46093	74	447.403	2.92988
KVMIVITDGESHDSPDLEK	CTRL3	D:\AmpK_Pass2\AmpKPass3\CTRL3	CTRL3_300ID_ZORBAX_ZED_TT_03Apr2014	2114.76	12296.4	3	46093	190	805.208	2.92967
KVMIVITDGESHDSPDLEK	CTRL3	D:\AmpK_Pass2\AmpKPass3\CTRL3	CTRL3_300ID_ZORBAX_ZED_TT_03Apr2014	2114.76	12296.4	3	46093	123	585.426	2.92846
KVMIVITDGESHDSPDLEK	CTRL3	D:\AmpK_Pass2\AmpKPass3\CTRL3	CTRL3_300ID_ZORBAX_ZED_TT_03Apr2014	2114.76	12296.4	3	46093	70	435.544	2.92558
KVMIVITDGESHDSPDLEK	CTRL3	D:\AmpK_Pass2\AmpKPass3\CTRL3	CTRL3_300ID_ZORBAX_ZED_TT_03Apr2014	2114.76	12296.4	3	46093	52	383.388	2.86739
KVMIVITDGESHDSPDLEK	CTRL3	D:\AmpK_Pass2\AmpKPass3\CTRL3	CTRL3_300ID_ZORBAX_ZED_TT_03Apr2014	2114.76	12296.4	3	46093	162	671.567	2.84503
KVMIVITDGESHDSPDLEK	CTRL3	D:\AmpK_Pass2\AmpKPass3\CTRL3	CTRL3_300ID_ZORBAX_ZED_TT_03Apr2014	2114.76	12296.4	3	46093	79	463.316	2.72864
KVMIVITDGESHDSPDLEK	CTRL3	D:\AmpK_Pass2\AmpKPass3\CTRL3	CTRL3_300ID_ZORBAX_ZED_TT_03Apr2014	2114.76	12296.4	3	46093	101	518.458	2.72462
KVMIVITDGESHDSPDLEK	CTRL3	D:\AmpK_Pass2\AmpKPass3\CTRL3	CTRL3_300ID_ZORBAX_ZED_TT_03Apr2014	2114.76	12296.4	3	46093	119	577.368	2.72409
KVMIVITDGESHDSPDLEK	CTRL3	D:\AmpK_Pass2\AmpKPass3\CTRL3	CTRL3_300ID_ZORBAX_ZED_TT_03Apr2014	2114.76	12296.4	3	46093	4	211.427	2.53472
KVMIVITDGESHDSPDLEK	CTRL3	D:\AmpK_Pass2\AmpKPass3\CTRL3	CTRL3_300ID_ZORBAX_ZED_TT_03Apr2014	2114.76	12296.4	3	46093	242	1215.93	2.53293
KVMIVITDGESHDSPDLEK	CTRL3	D:\AmpK_Pass2\AmpKPass3\CTRL3	CTRL3_300ID_ZORBAX_ZED_TT_03Apr2014	2114.76	12296.4	3	46093	64	420.186	2.53016
KVMIVITDGESHDSPDLEK	CTRL3	D:\AmpK_Pass2\AmpKPass3\CTRL3	CTRL3_300ID_ZORBAX_ZED_TT_03Apr2014	2114.76	12296.4	3	46093	143	634.428	2.52734
KVMIVITDGESHDSPDLEK	CTRL3	D:\AmpK_Pass2\AmpKPass3\CTRL3	CTRL3_300ID_ZORBAX_ZED_TT_03Apr2014	2114.76	12296.4	3	46093	215	993.469	2.51716
KVMIVITDGESHDSPDLEK	CTRL3	D:\AmpK_Pass2\AmpKPass3\CTRL3	CTRL3_300ID_ZORBAX_ZED_TT_03Apr2014	2114.76	12296.4	3	46093	208	950.843	2.37382
KVMIVITDGESHDSPDLEK	CTRL3	D:\AmpK_Pass2\AmpKPass3\CTRL3	CTRL3_300ID_ZORBAX_ZED_TT_03Apr2014	2114.76	12296.4	3	46093	48	363.021	2.32897
KVMIVITDGESHDSPDLEK	CTRL3	D:\AmpK_Pass2\AmpKPass3\CTRL3	CTRL3_300ID_ZORBAX_ZED_TT_03Apr2014	2114.76	12296.4	3	46093	61	411.422	2.32719
KVMIVITDGESHDSPDLEK	CTRL3	D:\AmpK_Pass2\AmpKPass3\CTRL3	CTRL3_300ID_ZORBAX_ZED_TT_03Apr2014	2114.76	12296.4	3	46093	69	427.412	2.32644
KVMIVITDGESHDSPDLEK	CTRL3	D:\AmpK_Pass2\AmpKPass3\CTRL3	CTRL3_300ID_ZORBAX_ZED_TT_03Apr2014	2114.76	12296.4	3	46093	230	1065.62	2.32336
KVMIVITDGESHDSPDLEK	CTRL3	D:\AmpK_Pass2\AmpKPass3\CTRL3	CTRL3_300ID_ZORBAX_ZED_TT_03Apr2014	2114.76	12296.4	3	46093	140	631.22	2.32231
KVMIVITDGESHDSPDLEK	CTRL3	D:\AmpK_Pass2\AmpKPass3\CTRL3	CTRL3_300ID_ZORBAX_ZED_TT_03Apr2014	2114.76	12296.4	3	46093	21	281.891	2.31619
KVMIVITDGESHDSPDLEK	CTRL3	D:\AmpK_Pass2\AmpKPass3\CTRL3	CTRL3_300ID_ZORBAX_ZED_TT_03Apr2014	2114.76	12296.4	3	46093	67	423.598	2.2728
KVMIVITDGESHDSPDLEK	CTRL3	D:\AmpK_Pass2\AmpKPass3\CTRL3	CTRL3_300ID_ZORBAX_ZED_TT_03Apr2014	2114.76	12296.4	3	46093	194	831.501	2.14207
KVMIVITDGESHDSPDLEK	CTRL3	D:\AmpK_Pass2\AmpKPass3\CTRL3	CTRL3_300ID_ZORBAX_ZED_TT_03Apr2014	2114.76	12296.4	3	46093	179	716.508	2.12452
KVMIVITDGESHDSPDLEK	CTRL3	D:\AmpK_Pass2\AmpKPass3\CTRL3	CTRL3_300ID_ZORBAX_ZED_TT_03Apr2014	2114.76	12296.4	3	46093	1	205.339	2.1231
KVMIVITDGESHDSPDLEK	CTRL3	D:\AmpK_Pass2\AmpKPass3\CTRL3	CTRL3_300ID_ZORBAX_ZED_TT_03Apr2014	2114.76	12296.4	3	46093	209	951.45	2.11877
KVMIVITDGESHDSPDLEK	CTRL3	D:\AmpK_Pass2\AmpKPass3\CTRL3	CTRL3_300ID_ZORBAX_ZED_TT_03Apr2014	2114.76	12296.4	3	46093	33	326.384	2.11493
KVMIVITDGESHDSPDLEK	CTRL3	D:\AmpK_Pass2\AmpKPass3\CTRL3	CTRL3_300ID_ZORBAX_ZED_TT_03Apr2014	2114.76	12296.4	3	46093	178	705.466	2.03514
KVMIVITDGESHDSPDLEK	CTRL3	D:\AmpK_Pass2\AmpKPass3\CTRL3	CTRL3_300ID_ZORBAX_ZED_TT_03Apr2014	2114.76	12296.4	3	46093	49	365.026	1.92878
KVMIVITDGESHDSPDLEK	CTRL3	D:\AmpK_Pass2\AmpKPass3\CTRL3	CTRL3_300ID_ZORBAX_ZED_TT_03Apr2014	2114.76	12296.4	3	46093	220	1008.43	1.92262
KVMIVITDGESHDSPDLEK	CTRL3	D:\AmpK_Pass2\AmpKPass3\CTRL3	CTRL3_300ID_ZORBAX_ZED_TT_03Apr2014	2114.76	12296.4	3	46093	24	297.039	1.92232
KVMIVITDGESHDSPDLEK	CTRL3	D:\AmpK_Pass2\AmpKPass3\CTRL3	CTRL3_300ID_ZORBAX_ZED_TT_03Apr2014	2114.76	12296.4	3	46093	75	452.201	1.92141
KVMIVITDGESHDSPDLEK	CTRL3	D:\AmpK_Pass2\AmpKPass3\CTRL3	CTRL3_300ID_ZORBAX_ZED_TT_03Apr2014	2114.76	12296.4	3	46093	229	1057.75	1.92061
KVMIVITDGESHDSPDLEK	CTRL3	D:\AmpK_Pass2\AmpKPass3\CTRL3	CTRL3_300ID_ZORBAX_ZED_TT_03Apr2014	2114.76	12296.4	3	46093	105	531.553	1.90831
KVMIVITDGESHDSPDLEK	CTRL3	D:\AmpK_Pass2\AmpKPass3\CTRL3	CTRL3_300ID_ZORBAX_ZED_TT_03Apr2014	2114.76	12296.4	3	46093	25	297.647	1.77691
KVMIVITDGESHDSPDLEK	CTRL3	D:\AmpK_Pass2\AmpKPass3\CTRL3	CTRL3_300ID_ZORBAX_ZED_TT_03Apr2014	2114.76	12296.4	3	46093	41	344.268	1.72505
KVMIVITDGESHDSPDLEK	CTRL3	D:\AmpK_Pass2\AmpKPass3\CTRL3	CTRL3_300ID_ZORBAX_ZED_TT_03Apr2014	2114.76	12296.4	3	46093	213	963.591	1.72308
KVMIVITDGESHDSPDLEK	CTRL3	D:\AmpK_Pass2\AmpKPass3\CTRL3	CTRL3_300ID_ZORBAX_ZED_TT_03Apr2014	2114.76	12296.4	3	46093	121	579.115	1.72258
KVMIVITDGESHDSPDLEK	CTRL3	D:\AmpK_Pass2\AmpKPass3\CTRL3	CTRL3_300ID_ZORBAX_ZED_TT_03Apr2014	2114.76	12296.4	3	46093	91	491.334	1.72205
KVMIVITDGESHDSPDLEK	CTRL3	D:\AmpK_Pass2\AmpKPass3\CTRL3	CTRL3_300ID_ZORBAX_ZED_TT_03Apr2014	2114.76	12296.4	3	46093	137	619.218	1.71079
KVMIVITDGESHDSPDLEK	CTRL3	D:\AmpK_Pass2\AmpKPass3\CTRL3	CTRL3_300ID_ZORBAX_ZED_TT_03Apr2014	2114.76	12296.4	3	46093	149	648.175	1.68655
KVMIVITDGESHDSPDLEK	CTRL3	D:\AmpK_Pass2\AmpKPass3\CTRL3	CTRL3_300ID_ZORBAX_ZED_TT_03Apr2014	2114.76	12296.4	3	46093	218	998.474	1.6639
KVMIVITDGESHDSPDLEK	CTRL3	D:\AmpK_Pass2\AmpKPass3\CTRL3	CTRL3_300ID_ZORBAX_ZED_TT_03Apr2014	2114.76	12296.4	3	46093	141	632.401	1.54376
KVMIVITDGESHDSPDLEK	CTRL3	D:\AmpK_Pass2\AmpKPass3\CTRL3	CTRL3_300ID_ZORBAX_ZED_TT_03Apr2014	2114.76	12296.4	3	46093	17	271.121	1.51947
KVMIVITDGESHDSPDLEK	CTRL3	D:\AmpK_Pass2\AmpKPass3\CTRL3	CTRL3_300ID_ZORBAX_ZED_TT_03Apr2014	2114.76	12296.4	3	46093	2	207.167	0.931745
LGLSLATNPK	CTRL3	D:\AmpK_Pass2\AmpKPass3\CTRL3	CTRL3_300ID_ZORBAX_ZED_TT_03Apr2014	1010	9927.52	2	42841	141	487.324	189.888
LGLSLATNPK	CTRL3	D:\AmpK_Pass2\AmpKPass3\CTRL3	CTRL3_300ID_ZORBAX_ZED_TT_03Apr2014	1010	9927.52	2	42841	146	496.997	143.59
LGLSLATNPK	CTRL3	D:\AmpK_Pass2\AmpKPass3\CTRL3	CTRL3_300ID_ZORBAX_ZED_TT_03Apr2014	1010	9927.52	2	42841	142	488.395	104.826
LGLSLATNPK	CTRL3	D:\AmpK_Pass2\AmpKPass3\CTRL3	CTRL3_300ID_ZORBAX_ZED_TT_03Apr2014	1010	9927.52	2	42841	137	483.109	88.3846
LGLSLATNPK	CTRL3	D:\AmpK_Pass2\AmpKPass3\CTRL3	CTRL3_300ID_ZORBAX_ZED_TT_03Apr2014	1010	9927.52	2	42841	112	443.324	64.4245
LGLSLATNPK	CTRL3	D:\AmpK_Pass2\AmpKPass3\CTRL3	CTRL3_300ID_ZORBAX_ZED_TT_03Apr2014	1010	9927.52	2	42841	130	470.406	56.4913
LGLSLATNPK	CTRL3	D:\AmpK_Pass2\AmpKPass3\CTRL3	CTRL3_300ID_ZORBAX_ZED_TT_03Apr2014	1010	9927.52	2	42841	123	461.417	50.7585
LGLSLATNPK	CTRL3	D:\AmpK_Pass2\AmpKPass3\CTRL3	CTRL3_300ID_ZORBAX_ZED_TT_03Apr2014	1010	9927.52	2	42841	126	464.307	44.9902
LGLSLATNPK	CTRL3	D:\AmpK_Pass2\AmpKPass3\CTRL3	CTRL3_300ID_ZORBAX_ZED_TT_03Apr2014	1010	9927.52	2	42841	66	362.474	43.5708
LGLSLATNPK	CTRL3	D:\AmpK_Pass2\AmpKPass3\CTRL3	CTRL3_300ID_ZORBAX_ZED_TT_03Apr2014	1010	9927.52	2	42841	79	385.154	39.4585
LGLSLATNPK	CTRL3	D:\AmpK_Pass2\AmpKPass3\CTRL3	CTRL3_300ID_ZORBAX_ZED_TT_03Apr2014	1010	9927.52	2	42841	55	335.917	33.0077
LGLSLATNPK	CTRL3	D:\AmpK_Pass2\AmpKPass3\CTRL3	CTRL3_300ID_ZORBAX_ZED_TT_03Apr2014	1010	9927.52	2	42841	113	445.373	31.6341
LGLSLATNPK	CTRL3	D:\AmpK_Pass2\AmpKPass3\CTRL3	CTRL3_300ID_ZORBAX_ZED_TT_03Apr2014	1010	9927.52	2	42841	92	411.321	29.8884
LGLSLATNPK	CTRL3	D:\AmpK_Pass2\AmpKPass3\CTRL3	CTRL3_300ID_ZORBAX_ZED_TT_03Apr2014	1010	9927.52	2	42841	111	442.361	28.4522
LGLSLATNPK	CTRL3	D:\AmpK_Pass2\AmpKPass3\CTRL3	CTRL3_300ID_ZORBAX_ZED_TT_03Apr2014	1010	9927.52	2	42841	127	465.197	27.8376
LGLSLATNPK	CTRL3	D:\AmpK_Pass2\AmpKPass3\CTRL3	CTRL3_300ID_ZORBAX_ZED_TT_03Apr2014	1010	9927.52	2	42841	122	460.383	27.7882
LGLSLATNPK	CTRL3	D:\AmpK_Pass2\AmpKPass3\CTRL3	CTRL3_300ID_ZORBAX_ZED_TT_03Apr2014	1010	9927.52	2	42841	119	453.855	27.6649
LGLSLATNPK	CTRL3	D:\AmpK_Pass2\AmpKPass3\CTRL3	CTRL3_300ID_ZORBAX_ZED_TT_03Apr2014	1010	9927.52	2	42841	138	483.895	27.4201
LGLSLATNPK	CTRL3	D:\AmpK_Pass2\AmpKPass3\CTRL3	CTRL3_300ID_ZORBAX_ZED_TT_03Apr2014	1010	9927.52	2	42841	143	489.343	26.4221
LGLSLATNPK	CTRL3	D:\AmpK_Pass2\AmpKPass3\CTRL3	CTRL3_300ID_ZORBAX_ZED_TT_03Apr2014	1010	9927.52	2	42841	56	341.358	25.8522
LGLSLATNPK	CTRL3	D:\AmpK_Pass2\AmpKPass3\CTRL3	CTRL3_300ID_ZORBAX_ZED_TT_03Apr2014	1010	9927.52	2	42841	100	426.435	25.253
LGLSLATNPK	CTRL3	D:\AmpK_Pass2\AmpKPass3\CTRL3	CTRL3_300ID_ZORBAX_ZED_TT_03Apr2014	1010	9927.52	2	42841	95	416.309	24.8076
LGLSLATNPK	CTRL3	D:\AmpK_Pass2\AmpKPass3\CTRL3	CTRL3_300ID_ZORBAX_ZED_TT_03Apr2014	1010	9927.52	2	42841	151	536.472	24.4561
LGLSLATNPK	CTRL3	D:\AmpK_Pass2\AmpKPass3\CTRL3	CTRL3_300ID_ZORBAX_ZED_TT_03Apr2014	1010	9927.52	2	42841	103	431.097	23.9413
LGLSLATNPK	CTRL3	D:\AmpK_Pass2\AmpKPass3\CTRL3	CTRL3_300ID_ZORBAX_ZED_TT_03Apr2014	1010	9927.52	2	42841	47	311.412	23.7401
LGLSLATNPK	CTRL3	D:\AmpK_Pass2\AmpKPass3\CTRL3	CTRL3_300ID_ZORBAX_ZED_TT_03Apr2014	1010	9927.52	2	42841	147	498.027	23.5504
LGLSLATNPK	CTRL3	D:\AmpK_Pass2\AmpKPass3\CTRL3	CTRL3_300ID_ZORBAX_ZED_TT_03Apr2014	1010	9927.52	2	42841	91	410.68	23.5333
LGLSLATNPK	CTRL3	D:\AmpK_Pass2\AmpKPass3\CTRL3	CTRL3_300ID_ZORBAX_ZED_TT_03Apr2014	1010	9927.52	2	42841	78	380.395	23.1033
LGLSLATNPK	CTRL3	D:\AmpK_Pass2\AmpKPass3\CTRL3	CTRL3_300ID_ZORBAX_ZED_TT_03Apr2014	1010	9927.52	2	42841	71	370.497	22.4078
LGLSLATNPK	CTRL3	D:\AmpK_Pass2\AmpKPass3\CTRL3	CTRL3_300ID_ZORBAX_ZED_TT_03Apr2014	1010	9927.52	2	42841	72	371.42	21.4496
LGLSLATNPK	CTRL3	D:\AmpK_Pass2\AmpKPass3\CTRL3	CTRL3_300ID_ZORBAX_ZED_TT_03Apr2014	1010	9927.52	2	42841	96	421.255	21.4424
LGLSLATNPK	CTRL3	D:\AmpK_Pass2\AmpKPass3\CTRL3	CTRL3_300ID_ZORBAX_ZED_TT_03Apr2014	1010	9927.52	2	42841	155	564.458	21.3107
LGLSLATNPK	CTRL3	D:\AmpK_Pass2\AmpKPass3\CTRL3	CTRL3_300ID_ZORBAX_ZED_TT_03Apr2014	1010	9927.52	2	42841	35	283.161	21.2247
LGLSLATNPK	CTRL3	D:\AmpK_Pass2\AmpKPass3\CTRL3	CTRL3_300ID_ZORBAX_ZED_TT_03Apr2014	1010	9927.52	2	42841	87	406.051	20.2128
LGLSLATNPK	CTRL3	D:\AmpK_Pass2\AmpKPass3\CTRL3	CTRL3_300ID_ZORBAX_ZED_TT_03Apr2014	1010	9927.52	2	42841	99	425.535	20.1718
LGLSLATNPK	CTRL3	D:\AmpK_Pass2\AmpKPass3\CTRL3	CTRL3_300ID_ZORBAX_ZED_TT_03Apr2014	1010	9927.52	2	42841	131	471.182	19.906
LGLSLATNPK	CTRL3	D:\AmpK_Pass2\AmpKPass3\CTRL3	CTRL3_300ID_ZORBAX_ZED_TT_03Apr2014	1010	9927.52	2	42841	128	468.806	19.6826
LGLSLATNPK	CTRL3	D:\AmpK_Pass2\AmpKPass3\CTRL3	CTRL3_300ID_ZORBAX_ZED_TT_03Apr2014	1010	9927.52	2	42841	45	307.297	19.2793
LGLSLATNPK	CTRL3	D:\AmpK_Pass2\AmpKPass3\CTRL3	CTRL3_300ID_ZORBAX_ZED_TT_03Apr2014	1010	9927.52	2	42841	117	451.278	19.0744
LGLSLATNPK	CTRL3	D:\AmpK_Pass2\AmpKPass3\CTRL3	CTRL3_300ID_ZORBAX_ZED_TT_03Apr2014	1010	9927.52	2	42841	144	493.858	18.8911
LGLSLATNPK	CTRL3	D:\AmpK_Pass2\AmpKPass3\CTRL3	CTRL3_300ID_ZORBAX_ZED_TT_03Apr2014	1010	9927.52	2	42841	58	347.195	18.5784
LGLSLATNPK	CTRL3	D:\AmpK_Pass2\AmpKPass3\CTRL3	CTRL3_300ID_ZORBAX_ZED_TT_03Apr2014	1010	9927.52	2	42841	17	229.565	18.3589
LGLSLATNPK	CTRL3	D:\AmpK_Pass2\AmpKPass3\CTRL3	CTRL3_300ID_ZORBAX_ZED_TT_03Apr2014	1010	9927.52	2	42841	67	363.114	18.2785
LGLSLATNPK	CTRL3	D:\AmpK_Pass2\AmpKPass3\CTRL3	CTRL3_300ID_ZORBAX_ZED_TT_03Apr2014	1010	9927.52	2	42841	86	405.172	17.9014
LGLSLATNPK	CTRL3	D:\AmpK_Pass2\AmpKPass3\CTRL3	CTRL3_300ID_ZORBAX_ZED_TT_03Apr2014	1010	9927.52	2	42841	68	365.413	17.256
LGLSLATNPK	CTRL3	D:\AmpK_Pass2\AmpKPass3\CTRL3	CTRL3_300ID_ZORBAX_ZED_TT_03Apr2014	1010	9927.52	2	42841	108	439.103	16.8215
LGLSLATNPK	CTRL3	D:\AmpK_Pass2\AmpKPass3\CTRL3	CTRL3_300ID_ZORBAX_ZED_TT_03Apr2014	1010	9927.52	2	42841	50	322.11	16.7872
LGLSLATNPK	CTRL3	D:\AmpK_Pass2\AmpKPass3\CTRL3	CTRL3_300ID_ZORBAX_ZED_TT_03Apr2014	1010	9927.52	2	42841	116	448.053	16.4009
LGLSLATNPK	CTRL3	D:\AmpK_Pass2\AmpKPass3\CTRL3	CTRL3_300ID_ZORBAX_ZED_TT_03Apr2014	1010	9927.52	2	42841	46	309.14	15.9343
LGLSLATNPK	CTRL3	D:\AmpK_Pass2\AmpKPass3\CTRL3	CTRL3_300ID_ZORBAX_ZED_TT_03Apr2014	1010	9927.52	2	42841	136	482.23	15.8015
LGLSLATNPK	CTRL3	D:\AmpK_Pass2\AmpKPass3\CTRL3	CTRL3_300ID_ZORBAX_ZED_TT_03Apr2014	1010	9927.52	2	42841	20	243.035	15.7455
LGLSLATNPK	CTRL3	D:\AmpK_Pass2\AmpKPass3\CTRL3	CTRL3_300ID_ZORBAX_ZED_TT_03Apr2014	1010	9927.52	2	42841	190	992.534	15.6638
LGLSLATNPK	CTRL3	D:\AmpK_Pass2\AmpKPass3\CTRL3	CTRL3_300ID_ZORBAX_ZED_TT_03Apr2014	1010	9927.52	2	42841	61	354.463	15.3624
LGLSLATNPK	CTRL3	D:\AmpK_Pass2\AmpKPass3\CTRL3	CTRL3_300ID_ZORBAX_ZED_TT_03Apr2014	1010	9927.52	2	42841	48	319.305	15.3574
LGLSLATNPK	CTRL3	D:\AmpK_Pass2\AmpKPass3\CTRL3	CTRL3_300ID_ZORBAX_ZED_TT_03Apr2014	1010	9927.52	2	42841	69	366.481	15.0573
LGLSLATNPK	CTRL3	D:\AmpK_Pass2\AmpKPass3\CTRL3	CTRL3_300ID_ZORBAX_ZED_TT_03Apr2014	1010	9927.52	2	42841	39	295.375	14.9338
LGLSLATNPK	CTRL3	D:\AmpK_Pass2\AmpKPass3\CTRL3	CTRL3_300ID_ZORBAX_ZED_TT_03Apr2014	1010	9927.52	2	42841	140	485.841	14.9253
LGLSLATNPK	CTRL3	D:\AmpK_Pass2\AmpKPass3\CTRL3	CTRL3_300ID_ZORBAX_ZED_TT_03Apr2014	1010	9927.52	2	42841	163	640.701	14.7856
LGLSLATNPK	CTRL3	D:\AmpK_Pass2\AmpKPass3\CTRL3	CTRL3_300ID_ZORBAX_ZED_TT_03Apr2014	1010	9927.52	2	42841	94	415.413	14.7323
LGLSLATNPK	CTRL3	D:\AmpK_Pass2\AmpKPass3\CTRL3	CTRL3_300ID_ZORBAX_ZED_TT_03Apr2014	1010	9927.52	2	42841	98	424.574	14.7323
LGLSLATNPK	CTRL3	D:\AmpK_Pass2\AmpKPass3\CTRL3	CTRL3_300ID_ZORBAX_ZED_TT_03Apr2014	1010	9927.52	2	42841	83	393.259	13.8015
LGLSLATNPK	CTRL3	D:\AmpK_Pass2\AmpKPass3\CTRL3	CTRL3_300ID_ZORBAX_ZED_TT_03Apr2014	1010	9927.52	2	42841	132	474.445	13.5692
LGLSLATNPK	CTRL3	D:\AmpK_Pass2\AmpKPass3\CTRL3	CTRL3_300ID_ZORBAX_ZED_TT_03Apr2014	1010	9927.52	2	42841	179	789.78	13.4956
LGLSLATNPK	CTRL3	D:\AmpK_Pass2\AmpKPass3\CTRL3	CTRL3_300ID_ZORBAX_ZED_TT_03Apr2014	1010	9927.52	2	42841	176	749.198	12.9496
LGLSLATNPK	CTRL3	D:\AmpK_Pass2\AmpKPass3\CTRL3	CTRL3_300ID_ZORBAX_ZED_TT_03Apr2014	1010	9927.52	2	42841	125	463.286	12.572
LGLSLATNPK	CTRL3	D:\AmpK_Pass2\AmpKPass3\CTRL3	CTRL3_300ID_ZORBAX_ZED_TT_03Apr2014	1010	9927.52	2	42841	168	683.372	12.3731
LGLSLATNPK	CTRL3	D:\AmpK_Pass2\AmpKPass3\CTRL3	CTRL3_300ID_ZORBAX_ZED_TT_03Apr2014	1010	9927.52	2	42841	166	661.929	12.2959
LGLSLATNPK	CTRL3	D:\AmpK_Pass2\AmpKPass3\CTRL3	CTRL3_300ID_ZORBAX_ZED_TT_03Apr2014	1010	9927.52	2	42841	177	750.435	11.9485
LGLSLATNPK	CTRL3	D:\AmpK_Pass2\AmpKPass3\CTRL3	CTRL3_300ID_ZORBAX_ZED_TT_03Apr2014	1010	9927.52	2	42841	129	469.442	11.8355
LGLSLATNPK	CTRL3	D:\AmpK_Pass2\AmpKPass3\CTRL3	CTRL3_300ID_ZORBAX_ZED_TT_03Apr2014	1010	9927.52	2	42841	16	227.116	11.6886
LGLSLATNPK	CTRL3	D:\AmpK_Pass2\AmpKPass3\CTRL3	CTRL3_300ID_ZORBAX_ZED_TT_03Apr2014	1010	9927.52	2	42841	89	408.132	11.5112
LGLSLATNPK	CTRL3	D:\AmpK_Pass2\AmpKPass3\CTRL3	CTRL3_300ID_ZORBAX_ZED_TT_03Apr2014	1010	9927.52	2	42841	77	379.17	11.4291
LGLSLATNPK	CTRL3	D:\AmpK_Pass2\AmpKPass3\CTRL3	CTRL3_300ID_ZORBAX_ZED_TT_03Apr2014	1010	9927.52	2	42841	53	331.168	11.2281
LGLSLATNPK	CTRL3	D:\AmpK_Pass2\AmpKPass3\CTRL3	CTRL3_300ID_ZORBAX_ZED_TT_03Apr2014	1010	9927.52	2	42841	63	357.275	11.1075
LGLSLATNPK	CTRL3	D:\AmpK_Pass2\AmpKPass3\CTRL3	CTRL3_300ID_ZORBAX_ZED_TT_03Apr2014	1010	9927.52	2	42841	169	684.628	11.0897
LGLSLATNPK	CTRL3	D:\AmpK_Pass2\AmpKPass3\CTRL3	CTRL3_300ID_ZORBAX_ZED_TT_03Apr2014	1010	9927.52	2	42841	109	440.519	11.0585
LGLSLATNPK	CTRL3	D:\AmpK_Pass2\AmpKPass3\CTRL3	CTRL3_300ID_ZORBAX_ZED_TT_03Apr2014	1010	9927.52	2	42841	118	452.342	11.043
LGLSLATNPK	CTRL3	D:\AmpK_Pass2\AmpKPass3\CTRL3	CTRL3_300ID_ZORBAX_ZED_TT_03Apr2014	1010	9927.52	2	42841	14	221.249	10.4517
LGLSLATNPK	CTRL3	D:\AmpK_Pass2\AmpKPass3\CTRL3	CTRL3_300ID_ZORBAX_ZED_TT_03Apr2014	1010	9927.52	2	42841	188	965.654	10.4163
LGLSLATNPK	CTRL3	D:\AmpK_Pass2\AmpKPass3\CTRL3	CTRL3_300ID_ZORBAX_ZED_TT_03Apr2014	1010	9927.52	2	42841	28	269.358	10.1709
LGLSLATNPK	CTRL3	D:\AmpK_Pass2\AmpKPass3\CTRL3	CTRL3_300ID_ZORBAX_ZED_TT_03Apr2014	1010	9927.52	2	42841	185	912.372	9.81638
LGLSLATNPK	CTRL3	D:\AmpK_Pass2\AmpKPass3\CTRL3	CTRL3_300ID_ZORBAX_ZED_TT_03Apr2014	1010	9927.52	2	42841	186	951.504	9.75805
LGLSLATNPK	CTRL3	D:\AmpK_Pass2\AmpKPass3\CTRL3	CTRL3_300ID_ZORBAX_ZED_TT_03Apr2014	1010	9927.52	2	42841	36	284.142	9.70311
LGLSLATNPK	CTRL3	D:\AmpK_Pass2\AmpKPass3\CTRL3	CTRL3_300ID_ZORBAX_ZED_TT_03Apr2014	1010	9927.52	2	42841	160	609.623	9.5787
LGLSLATNPK	CTRL3	D:\AmpK_Pass2\AmpKPass3\CTRL3	CTRL3_300ID_ZORBAX_ZED_TT_03Apr2014	1010	9927.52	2	42841	106	434.688	9.46733
LGLSLATNPK	CTRL3	D:\AmpK_Pass2\AmpKPass3\CTRL3	CTRL3_300ID_ZORBAX_ZED_TT_03Apr2014	1010	9927.52	2	42841	64	358.376	9.1937
LGLSLATNPK	CTRL3	D:\AmpK_Pass2\AmpKPass3\CTRL3	CTRL3_300ID_ZORBAX_ZED_TT_03Apr2014	1010	9927.52	2	42841	189	966.957	9.17287
LGLSLATNPK	CTRL3	D:\AmpK_Pass2\AmpKPass3\CTRL3	CTRL3_300ID_ZORBAX_ZED_TT_03Apr2014	1010	9927.52	2	42841	88	407.135	9.13354
LGLSLATNPK	CTRL3	D:\AmpK_Pass2\AmpKPass3\CTRL3	CTRL3_300ID_ZORBAX_ZED_TT_03Apr2014	1010	9927.52	2	42841	152	547.771	8.83978
LGLSLATNPK	CTRL3	D:\AmpK_Pass2\AmpKPass3\CTRL3	CTRL3_300ID_ZORBAX_ZED_TT_03Apr2014	1010	9927.52	2	42841	13	216.965	8.4795
LGLSLATNPK	CTRL3	D:\AmpK_Pass2\AmpKPass3\CTRL3	CTRL3_300ID_ZORBAX_ZED_TT_03Apr2014	1010	9927.52	2	42841	192	995.179	8.11262
LGLSLATNPK	CTRL3	D:\AmpK_Pass2\AmpKPass3\CTRL3	CTRL3_300ID_ZORBAX_ZED_TT_03Apr2014	1010	9927.52	2	42841	8	189.011	8.00581
LGLSLATNPK	CTRL3	D:\AmpK_Pass2\AmpKPass3\CTRL3	CTRL3_300ID_ZORBAX_ZED_TT_03Apr2014	1010	9927.52	2	42841	12	210.081	7.97411
LGLSLATNPK	CTRL3	D:\AmpK_Pass2\AmpKPass3\CTRL3	CTRL3_300ID_ZORBAX_ZED_TT_03Apr2014	1010	9927.52	2	42841	162	615.868	7.66858
LGLSLATNPK	CTRL3	D:\AmpK_Pass2\AmpKPass3\CTRL3	CTRL3_300ID_ZORBAX_ZED_TT_03Apr2014	1010	9927.52	2	42841	97	423.388	7.66084
LGLSLATNPK	CTRL3	D:\AmpK_Pass2\AmpKPass3\CTRL3	CTRL3_300ID_ZORBAX_ZED_TT_03Apr2014	1010	9927.52	2	42841	65	361.27	7.49636
LGLSLATNPK	CTRL3	D:\AmpK_Pass2\AmpKPass3\CTRL3	CTRL3_300ID_ZORBAX_ZED_TT_03Apr2014	1010	9927.52	2	42841	180	819.936	7.47083
LGLSLATNPK	CTRL3	D:\AmpK_Pass2\AmpKPass3\CTRL3	CTRL3_300ID_ZORBAX_ZED_TT_03Apr2014	1010	9927.52	2	42841	34	282.129	7.4438
LGLSLATNPK	CTRL3	D:\AmpK_Pass2\AmpKPass3\CTRL3	CTRL3_300ID_ZORBAX_ZED_TT_03Apr2014	1010	9927.52	2	42841	167	682.653	7.21168
LGLSLATNPK	CTRL3	D:\AmpK_Pass2\AmpKPass3\CTRL3	CTRL3_300ID_ZORBAX_ZED_TT_03Apr2014	1010	9927.52	2	42841	124	462.159	6.79045
LGLSLATNPK	CTRL3	D:\AmpK_Pass2\AmpKPass3\CTRL3	CTRL3_300ID_ZORBAX_ZED_TT_03Apr2014	1010	9927.52	2	42841	115	447.369	6.75926
LGLSLATNPK	CTRL3	D:\AmpK_Pass2\AmpKPass3\CTRL3	CTRL3_300ID_ZORBAX_ZED_TT_03Apr2014	1010	9927.52	2	42841	156	566.639	6.59073
LGLSLATNPK	CTRL3	D:\AmpK_Pass2\AmpKPass3\CTRL3	CTRL3_300ID_ZORBAX_ZED_TT_03Apr2014	1010	9927.52	2	42841	133	475.458	6.5887
LGLSLATNPK	CTRL3	D:\AmpK_Pass2\AmpKPass3\CTRL3	CTRL3_300ID_ZORBAX_ZED_TT_03Apr2014	1010	9927.52	2	42841	145	495.099	6.54112
LGLSLATNPK	CTRL3	D:\AmpK_Pass2\AmpKPass3\CTRL3	CTRL3_300ID_ZORBAX_ZED_TT_03Apr2014	1010	9927.52	2	42841	60	351.247	6.43572
LGLSLATNPK	CTRL3	D:\AmpK_Pass2\AmpKPass3\CTRL3	CTRL3_300ID_ZORBAX_ZED_TT_03Apr2014	1010	9927.52	2	42841	187	964.634	6.34384
LGLSLATNPK	CTRL3	D:\AmpK_Pass2\AmpKPass3\CTRL3	CTRL3_300ID_ZORBAX_ZED_TT_03Apr2014	1010	9927.52	2	42841	51	328.654	6.19331
LGLSLATNPK	CTRL3	D:\AmpK_Pass2\AmpKPass3\CTRL3	CTRL3_300ID_ZORBAX_ZED_TT_03Apr2014	1010	9927.52	2	42841	9	199.28	6.17597
LGLSLATNPK	CTRL3	D:\AmpK_Pass2\AmpKPass3\CTRL3	CTRL3_300ID_ZORBAX_ZED_TT_03Apr2014	1010	9927.52	2	42841	5	171.009	6.16753
LGLSLATNPK	CTRL3	D:\AmpK_Pass2\AmpKPass3\CTRL3	CTRL3_300ID_ZORBAX_ZED_TT_03Apr2014	1010	9927.52	2	42841	175	740.577	5.96723
LGLSLATNPK	CTRL3	D:\AmpK_Pass2\AmpKPass3\CTRL3	CTRL3_300ID_ZORBAX_ZED_TT_03Apr2014	1010	9927.52	2	42841	52	329.569	5.95432
LGLSLATNPK	CTRL3	D:\AmpK_Pass2\AmpKPass3\CTRL3	CTRL3_300ID_ZORBAX_ZED_TT_03Apr2014	1010	9927.52	2	42841	31	276.148	5.95152
LGLSLATNPK	CTRL3	D:\AmpK_Pass2\AmpKPass3\CTRL3	CTRL3_300ID_ZORBAX_ZED_TT_03Apr2014	1010	9927.52	2	42841	25	254.237	5.9506
LGLSLATNPK	CTRL3	D:\AmpK_Pass2\AmpKPass3\CTRL3	CTRL3_300ID_ZORBAX_ZED_TT_03Apr2014	1010	9927.52	2	42841	30	272.87	5.9502
LGLSLATNPK	CTRL3	D:\AmpK_Pass2\AmpKPass3\CTRL3	CTRL3_300ID_ZORBAX_ZED_TT_03Apr2014	1010	9927.52	2	42841	37	291.253	5.90803
LGLSLATNPK	CTRL3	D:\AmpK_Pass2\AmpKPass3\CTRL3	CTRL3_300ID_ZORBAX_ZED_TT_03Apr2014	1010	9927.52	2	42841	102	429.621	5.59927
LGLSLATNPK	CTRL3	D:\AmpK_Pass2\AmpKPass3\CTRL3	CTRL3_300ID_ZORBAX_ZED_TT_03Apr2014	1010	9927.52	2	42841	153	549.587	5.5739
LGLSLATNPK	CTRL3	D:\AmpK_Pass2\AmpKPass3\CTRL3	CTRL3_300ID_ZORBAX_ZED_TT_03Apr2014	1010	9927.52	2	42841	38	293.57	5.53638
LGLSLATNPK	CTRL3	D:\AmpK_Pass2\AmpKPass3\CTRL3	CTRL3_300ID_ZORBAX_ZED_TT_03Apr2014	1010	9927.52	2	42841	73	374.315	5.53393
LGLSLATNPK	CTRL3	D:\AmpK_Pass2\AmpKPass3\CTRL3	CTRL3_300ID_ZORBAX_ZED_TT_03Apr2014	1010	9927.52	2	42841	75	377.623	5.50505
LGLSLATNPK	CTRL3	D:\AmpK_Pass2\AmpKPass3\CTRL3	CTRL3_300ID_ZORBAX_ZED_TT_03Apr2014	1010	9927.52	2	42841	139	484.727	5.35686
LGLSLATNPK	CTRL3	D:\AmpK_Pass2\AmpKPass3\CTRL3	CTRL3_300ID_ZORBAX_ZED_TT_03Apr2014	1010	9927.52	2	42841	158	604.189	5.35286
LGLSLATNPK	CTRL3	D:\AmpK_Pass2\AmpKPass3\CTRL3	CTRL3_300ID_ZORBAX_ZED_TT_03Apr2014	1010	9927.52	2	42841	40	296.761	5.33775
LGLSLATNPK	CTRL3	D:\AmpK_Pass2\AmpKPass3\CTRL3	CTRL3_300ID_ZORBAX_ZED_TT_03Apr2014	1010	9927.52	2	42841	22	249.304	5.31633
LGLSLATNPK	CTRL3	D:\AmpK_Pass2\AmpKPass3\CTRL3	CTRL3_300ID_ZORBAX_ZED_TT_03Apr2014	1010	9927.52	2	42841	27	265.3	5.3084
LGLSLATNPK	CTRL3	D:\AmpK_Pass2\AmpKPass3\CTRL3	CTRL3_300ID_ZORBAX_ZED_TT_03Apr2014	1010	9927.52	2	42841	19	241.487	5.16359
LGLSLATNPK	CTRL3	D:\AmpK_Pass2\AmpKPass3\CTRL3	CTRL3_300ID_ZORBAX_ZED_TT_03Apr2014	1010	9927.52	2	42841	183	906.495	5.10959
LGLSLATNPK	CTRL3	D:\AmpK_Pass2\AmpKPass3\CTRL3	CTRL3_300ID_ZORBAX_ZED_TT_03Apr2014	1010	9927.52	2	42841	165	645.775	5.10874
LGLSLATNPK	CTRL3	D:\AmpK_Pass2\AmpKPass3\CTRL3	CTRL3_300ID_ZORBAX_ZED_TT_03Apr2014	1010	9927.52	2	42841	148	519.231	5.10573
LGLSLATNPK	CTRL3	D:\AmpK_Pass2\AmpKPass3\CTRL3	CTRL3_300ID_ZORBAX_ZED_TT_03Apr2014	1010	9927.52	2	42841	54	333.311	5.10456
LGLSLATNPK	CTRL3	D:\AmpK_Pass2\AmpKPass3\CTRL3	CTRL3_300ID_ZORBAX_ZED_TT_03Apr2014	1010	9927.52	2	42841	105	433.802	5.08964
LGLSLATNPK	CTRL3	D:\AmpK_Pass2\AmpKPass3\CTRL3	CTRL3_300ID_ZORBAX_ZED_TT_03Apr2014	1010	9927.52	2	42841	41	299.542	5.07743
LGLSLATNPK	CTRL3	D:\AmpK_Pass2\AmpKPass3\CTRL3	CTRL3_300ID_ZORBAX_ZED_TT_03Apr2014	1010	9927.52	2	42841	191	994.497	4.89532
LGLSLATNPK	CTRL3	D:\AmpK_Pass2\AmpKPass3\CTRL3	CTRL3_300ID_ZORBAX_ZED_TT_03Apr2014	1010	9927.52	2	42841	101	428.495	4.8822
LGLSLATNPK	CTRL3	D:\AmpK_Pass2\AmpKPass3\CTRL3	CTRL3_300ID_ZORBAX_ZED_TT_03Apr2014	1010	9927.52	2	42841	11	207.587	4.78855
LGLSLATNPK	CTRL3	D:\AmpK_Pass2\AmpKPass3\CTRL3	CTRL3_300ID_ZORBAX_ZED_TT_03Apr2014	1010	9927.52	2	42841	42	301.801	4.76787
LGLSLATNPK	CTRL3	D:\AmpK_Pass2\AmpKPass3\CTRL3	CTRL3_300ID_ZORBAX_ZED_TT_03Apr2014	1010	9927.52	2	42841	120	458.186	4.67922
LGLSLATNPK	CTRL3	D:\AmpK_Pass2\AmpKPass3\CTRL3	CTRL3_300ID_ZORBAX_ZED_TT_03Apr2014	1010	9927.52	2	42841	121	459.47	4.66104
LGLSLATNPK	CTRL3	D:\AmpK_Pass2\AmpKPass3\CTRL3	CTRL3_300ID_ZORBAX_ZED_TT_03Apr2014	1010	9927.52	2	42841	33	280.912	4.53412
LGLSLATNPK	CTRL3	D:\AmpK_Pass2\AmpKPass3\CTRL3	CTRL3_300ID_ZORBAX_ZED_TT_03Apr2014	1010	9927.52	2	42841	170	696.586	4.4657
LGLSLATNPK	CTRL3	D:\AmpK_Pass2\AmpKPass3\CTRL3	CTRL3_300ID_ZORBAX_ZED_TT_03Apr2014	1010	9927.52	2	42841	29	270.293	4.46098
LGLSLATNPK	CTRL3	D:\AmpK_Pass2\AmpKPass3\CTRL3	CTRL3_300ID_ZORBAX_ZED_TT_03Apr2014	1010	9927.52	2	42841	93	412.135	4.45687
LGLSLATNPK	CTRL3	D:\AmpK_Pass2\AmpKPass3\CTRL3	CTRL3_300ID_ZORBAX_ZED_TT_03Apr2014	1010	9927.52	2	42841	76	378.339	4.2866
LGLSLATNPK	CTRL3	D:\AmpK_Pass2\AmpKPass3\CTRL3	CTRL3_300ID_ZORBAX_ZED_TT_03Apr2014	1010	9927.52	2	42841	15	222.057	4.24632
LGLSLATNPK	CTRL3	D:\AmpK_Pass2\AmpKPass3\CTRL3	CTRL3_300ID_ZORBAX_ZED_TT_03Apr2014	1010	9927.52	2	42841	110	441.553	4.24628
LGLSLATNPK	CTRL3	D:\AmpK_Pass2\AmpKPass3\CTRL3	CTRL3_300ID_ZORBAX_ZED_TT_03Apr2014	1010	9927.52	2	42841	134	476.549	4.23498
LGLSLATNPK	CTRL3	D:\AmpK_Pass2\AmpKPass3\CTRL3	CTRL3_300ID_ZORBAX_ZED_TT_03Apr2014	1010	9927.52	2	42841	164	642.552	4.22883
LGLSLATNPK	CTRL3	D:\AmpK_Pass2\AmpKPass3\CTRL3	CTRL3_300ID_ZORBAX_ZED_TT_03Apr2014	1010	9927.52	2	42841	21	246.317	4.03569
LGLSLATNPK	CTRL3	D:\AmpK_Pass2\AmpKPass3\CTRL3	CTRL3_300ID_ZORBAX_ZED_TT_03Apr2014	1010	9927.52	2	42841	62	355.222	4.03218
LGLSLATNPK	CTRL3	D:\AmpK_Pass2\AmpKPass3\CTRL3	CTRL3_300ID_ZORBAX_ZED_TT_03Apr2014	1010	9927.52	2	42841	84	396.756	3.87777
LGLSLATNPK	CTRL3	D:\AmpK_Pass2\AmpKPass3\CTRL3	CTRL3_300ID_ZORBAX_ZED_TT_03Apr2014	1010	9927.52	2	42841	2	147.899	3.82136
LGLSLATNPK	CTRL3	D:\AmpK_Pass2\AmpKPass3\CTRL3	CTRL3_300ID_ZORBAX_ZED_TT_03Apr2014	1010	9927.52	2	42841	159	608.365	3.81811
LGLSLATNPK	CTRL3	D:\AmpK_Pass2\AmpKPass3\CTRL3	CTRL3_300ID_ZORBAX_ZED_TT_03Apr2014	1010	9927.52	2	42841	59	349.565	3.77747
LGLSLATNPK	CTRL3	D:\AmpK_Pass2\AmpKPass3\CTRL3	CTRL3_300ID_ZORBAX_ZED_TT_03Apr2014	1010	9927.52	2	42841	3	155.223	3.60361
LGLSLATNPK	CTRL3	D:\AmpK_Pass2\AmpKPass3\CTRL3	CTRL3_300ID_ZORBAX_ZED_TT_03Apr2014	1010	9927.52	2	42841	178	788.787	3.60214
LGLSLATNPK	CTRL3	D:\AmpK_Pass2\AmpKPass3\CTRL3	CTRL3_300ID_ZORBAX_ZED_TT_03Apr2014	1010	9927.52	2	42841	161	610.559	3.59147
LGLSLATNPK	CTRL3	D:\AmpK_Pass2\AmpKPass3\CTRL3	CTRL3_300ID_ZORBAX_ZED_TT_03Apr2014	1010	9927.52	2	42841	26	260.244	3.43742
LGLSLATNPK	CTRL3	D:\AmpK_Pass2\AmpKPass3\CTRL3	CTRL3_300ID_ZORBAX_ZED_TT_03Apr2014	1010	9927.52	2	42841	24	251.661	3.41088
LGLSLATNPK	CTRL3	D:\AmpK_Pass2\AmpKPass3\CTRL3	CTRL3_300ID_ZORBAX_ZED_TT_03Apr2014	1010	9927.52	2	42841	49	321.225	3.38942
LGLSLATNPK	CTRL3	D:\AmpK_Pass2\AmpKPass3\CTRL3	CTRL3_300ID_ZORBAX_ZED_TT_03Apr2014	1010	9927.52	2	42841	150	529.296	3.38141
LGLSLATNPK	CTRL3	D:\AmpK_Pass2\AmpKPass3\CTRL3	CTRL3_300ID_ZORBAX_ZED_TT_03Apr2014	1010	9927.52	2	42841	114	446.142	3.37326
LGLSLATNPK	CTRL3	D:\AmpK_Pass2\AmpKPass3\CTRL3	CTRL3_300ID_ZORBAX_ZED_TT_03Apr2014	1010	9927.52	2	42841	173	728.81	3.26576
LGLSLATNPK	CTRL3	D:\AmpK_Pass2\AmpKPass3\CTRL3	CTRL3_300ID_ZORBAX_ZED_TT_03Apr2014	1010	9927.52	2	42841	7	179.329	3.19819
LGLSLATNPK	CTRL3	D:\AmpK_Pass2\AmpKPass3\CTRL3	CTRL3_300ID_ZORBAX_ZED_TT_03Apr2014	1010	9927.52	2	42841	174	739.938	3.17984
LGLSLATNPK	CTRL3	D:\AmpK_Pass2\AmpKPass3\CTRL3	CTRL3_300ID_ZORBAX_ZED_TT_03Apr2014	1010	9927.52	2	42841	32	280.07	3.17888
LGLSLATNPK	CTRL3	D:\AmpK_Pass2\AmpKPass3\CTRL3	CTRL3_300ID_ZORBAX_ZED_TT_03Apr2014	1010	9927.52	2	42841	181	832.62	3.17621
LGLSLATNPK	CTRL3	D:\AmpK_Pass2\AmpKPass3\CTRL3	CTRL3_300ID_ZORBAX_ZED_TT_03Apr2014	1010	9927.52	2	42841	149	523.781	3.17328
LGLSLATNPK	CTRL3	D:\AmpK_Pass2\AmpKPass3\CTRL3	CTRL3_300ID_ZORBAX_ZED_TT_03Apr2014	1010	9927.52	2	42841	182	833.74	3.17234
LGLSLATNPK	CTRL3	D:\AmpK_Pass2\AmpKPass3\CTRL3	CTRL3_300ID_ZORBAX_ZED_TT_03Apr2014	1010	9927.52	2	42841	6	172.04	3.17099
LGLSLATNPK	CTRL3	D:\AmpK_Pass2\AmpKPass3\CTRL3	CTRL3_300ID_ZORBAX_ZED_TT_03Apr2014	1010	9927.52	2	42841	104	432.371	3.17083
LGLSLATNPK	CTRL3	D:\AmpK_Pass2\AmpKPass3\CTRL3	CTRL3_300ID_ZORBAX_ZED_TT_03Apr2014	1010	9927.52	2	42841	157	580.012	2.99298
LGLSLATNPK	CTRL3	D:\AmpK_Pass2\AmpKPass3\CTRL3	CTRL3_300ID_ZORBAX_ZED_TT_03Apr2014	1010	9927.52	2	42841	23	251.013	2.9643
LGLSLATNPK	CTRL3	D:\AmpK_Pass2\AmpKPass3\CTRL3	CTRL3_300ID_ZORBAX_ZED_TT_03Apr2014	1010	9927.52	2	42841	107	437.563	2.96183
LGLSLATNPK	CTRL3	D:\AmpK_Pass2\AmpKPass3\CTRL3	CTRL3_300ID_ZORBAX_ZED_TT_03Apr2014	1010	9927.52	2	42841	10	204.205	2.95751
LGLSLATNPK	CTRL3	D:\AmpK_Pass2\AmpKPass3\CTRL3	CTRL3_300ID_ZORBAX_ZED_TT_03Apr2014	1010	9927.52	2	42841	184	910.692	2.95666
LGLSLATNPK	CTRL3	D:\AmpK_Pass2\AmpKPass3\CTRL3	CTRL3_300ID_ZORBAX_ZED_TT_03Apr2014	1010	9927.52	2	42841	81	391.168	2.7946
LGLSLATNPK	CTRL3	D:\AmpK_Pass2\AmpKPass3\CTRL3	CTRL3_300ID_ZORBAX_ZED_TT_03Apr2014	1010	9927.52	2	42841	82	391.996	2.77246
LGLSLATNPK	CTRL3	D:\AmpK_Pass2\AmpKPass3\CTRL3	CTRL3_300ID_ZORBAX_ZED_TT_03Apr2014	1010	9927.52	2	42841	43	303.102	2.74805
LGLSLATNPK	CTRL3	D:\AmpK_Pass2\AmpKPass3\CTRL3	CTRL3_300ID_ZORBAX_ZED_TT_03Apr2014	1010	9927.52	2	42841	57	343.283	2.74691
LGLSLATNPK	CTRL3	D:\AmpK_Pass2\AmpKPass3\CTRL3	CTRL3_300ID_ZORBAX_ZED_TT_03Apr2014	1010	9927.52	2	42841	85	403.385	2.74629
LGLSLATNPK	CTRL3	D:\AmpK_Pass2\AmpKPass3\CTRL3	CTRL3_300ID_ZORBAX_ZED_TT_03Apr2014	1010	9927.52	2	42841	70	368.319	2.55839
LGLSLATNPK	CTRL3	D:\AmpK_Pass2\AmpKPass3\CTRL3	CTRL3_300ID_ZORBAX_ZED_TT_03Apr2014	1010	9927.52	2	42841	171	698.429	2.53918
LGLSLATNPK	CTRL3	D:\AmpK_Pass2\AmpKPass3\CTRL3	CTRL3_300ID_ZORBAX_ZED_TT_03Apr2014	1010	9927.52	2	42841	74	375.414	2.53649
LGLSLATNPK	CTRL3	D:\AmpK_Pass2\AmpKPass3\CTRL3	CTRL3_300ID_ZORBAX_ZED_TT_03Apr2014	1010	9927.52	2	42841	18	232.116	2.53257
LGLSLATNPK	CTRL3	D:\AmpK_Pass2\AmpKPass3\CTRL3	CTRL3_300ID_ZORBAX_ZED_TT_03Apr2014	1010	9927.52	2	42841	4	165.287	2.53161
LGLSLATNPK	CTRL3	D:\AmpK_Pass2\AmpKPass3\CTRL3	CTRL3_300ID_ZORBAX_ZED_TT_03Apr2014	1010	9927.52	2	42841	90	409.413	2.37197
LGLSLATNPK	CTRL3	D:\AmpK_Pass2\AmpKPass3\CTRL3	CTRL3_300ID_ZORBAX_ZED_TT_03Apr2014	1010	9927.52	2	42841	154	557.587	2.32213
LGLSLATNPK	CTRL3	D:\AmpK_Pass2\AmpKPass3\CTRL3	CTRL3_300ID_ZORBAX_ZED_TT_03Apr2014	1010	9927.52	2	42841	172	702.862	2.3189
LGLSLATNPK	CTRL3	D:\AmpK_Pass2\AmpKPass3\CTRL3	CTRL3_300ID_ZORBAX_ZED_TT_03Apr2014	1010	9927.52	2	42841	135	478.048	2.31202
LGLSLATNPK	CTRL3	D:\AmpK_Pass2\AmpKPass3\CTRL3	CTRL3_300ID_ZORBAX_ZED_TT_03Apr2014	1010	9927.52	2	42841	1	146.985	2.13909
LGLSLATNPK	CTRL3	D:\AmpK_Pass2\AmpKPass3\CTRL3	CTRL3_300ID_ZORBAX_ZED_TT_03Apr2014	1010	9927.52	2	42841	80	389.118	2.10446
LGLSLATNPK	CTRL3	D:\AmpK_Pass2\AmpKPass3\CTRL3	CTRL3_300ID_ZORBAX_ZED_TT_03Apr2014	1010	9927.52	2	42841	44	306.537	1.88919
QIVFEISK	CTRL3	D:\AmpK_Pass2\AmpKPass3\CTRL3	CTRL3_300ID_ZORBAX_ZED_TT_03Apr2014	961.177	6214.73	3	29341	52	235.246	435.074
QIVFEISK	CTRL3	D:\AmpK_Pass2\AmpKPass3\CTRL3	CTRL3_300ID_ZORBAX_ZED_TT_03Apr2014	961.177	6214.73	3	29341	62	256.072	326.636
QIVFEISK	CTRL3	D:\AmpK_Pass2\AmpKPass3\CTRL3	CTRL3_300ID_ZORBAX_ZED_TT_03Apr2014	961.177	6214.73	3	29341	91	303.241	107.382
QIVFEISK	CTRL3	D:\AmpK_Pass2\AmpKPass3\CTRL3	CTRL3_300ID_ZORBAX_ZED_TT_03Apr2014	961.177	6214.73	3	29341	63	256.747	89.5979
QIVFEISK	CTRL3	D:\AmpK_Pass2\AmpKPass3\CTRL3	CTRL3_300ID_ZORBAX_ZED_TT_03Apr2014	961.177	6214.73	3	29341	76	279.968	77.2747
QIVFEISK	CTRL3	D:\AmpK_Pass2\AmpKPass3\CTRL3	CTRL3_300ID_ZORBAX_ZED_TT_03Apr2014	961.177	6214.73	3	29341	23	171.206	67.5929
QIVFEISK	CTRL3	D:\AmpK_Pass2\AmpKPass3\CTRL3	CTRL3_300ID_ZORBAX_ZED_TT_03Apr2014	961.177	6214.73	3	29341	75	278.972	57.9513
QIVFEISK	CTRL3	D:\AmpK_Pass2\AmpKPass3\CTRL3	CTRL3_300ID_ZORBAX_ZED_TT_03Apr2014	961.177	6214.73	3	29341	78	282.107	42.5371
QIVFEISK	CTRL3	D:\AmpK_Pass2\AmpKPass3\CTRL3	CTRL3_300ID_ZORBAX_ZED_TT_03Apr2014	961.177	6214.73	3	29341	85	292.767	36.4925
QIVFEISK	CTRL3	D:\AmpK_Pass2\AmpKPass3\CTRL3	CTRL3_300ID_ZORBAX_ZED_TT_03Apr2014	961.177	6214.73	3	29341	77	280.852	35.6019
QIVFEISK	CTRL3	D:\AmpK_Pass2\AmpKPass3\CTRL3	CTRL3_300ID_ZORBAX_ZED_TT_03Apr2014	961.177	6214.73	3	29341	99	312.403	23.8623
QIVFEISK	CTRL3	D:\AmpK_Pass2\AmpKPass3\CTRL3	CTRL3_300ID_ZORBAX_ZED_TT_03Apr2014	961.177	6214.73	3	29341	69	265.337	23.7593
QIVFEISK	CTRL3	D:\AmpK_Pass2\AmpKPass3\CTRL3	CTRL3_300ID_ZORBAX_ZED_TT_03Apr2014	961.177	6214.73	3	29341	112	409.119	22.6794
QIVFEISK	CTRL3	D:\AmpK_Pass2\AmpKPass3\CTRL3	CTRL3_300ID_ZORBAX_ZED_TT_03Apr2014	961.177	6214.73	3	29341	65	261.11	22.5051
QIVFEISK	CTRL3	D:\AmpK_Pass2\AmpKPass3\CTRL3	CTRL3_300ID_ZORBAX_ZED_TT_03Apr2014	961.177	6214.73	3	29341	12	148.985	22.3875
QIVFEISK	CTRL3	D:\AmpK_Pass2\AmpKPass3\CTRL3	CTRL3_300ID_ZORBAX_ZED_TT_03Apr2014	961.177	6214.73	3	29341	121	511.527	21.6674
QIVFEISK	CTRL3	D:\AmpK_Pass2\AmpKPass3\CTRL3	CTRL3_300ID_ZORBAX_ZED_TT_03Apr2014	961.177	6214.73	3	29341	53	237.038	20.4227
QIVFEISK	CTRL3	D:\AmpK_Pass2\AmpKPass3\CTRL3	CTRL3_300ID_ZORBAX_ZED_TT_03Apr2014	961.177	6214.73	3	29341	81	285.298	20.2608
QIVFEISK	CTRL3	D:\AmpK_Pass2\AmpKPass3\CTRL3	CTRL3_300ID_ZORBAX_ZED_TT_03Apr2014	961.177	6214.73	3	29341	103	347.219	18.8656
QIVFEISK	CTRL3	D:\AmpK_Pass2\AmpKPass3\CTRL3	CTRL3_300ID_ZORBAX_ZED_TT_03Apr2014	961.177	6214.73	3	29341	108	374.238	18.167
QIVFEISK	CTRL3	D:\AmpK_Pass2\AmpKPass3\CTRL3	CTRL3_300ID_ZORBAX_ZED_TT_03Apr2014	961.177	6214.73	3	29341	90	301.919	15.9873
QIVFEISK	CTRL3	D:\AmpK_Pass2\AmpKPass3\CTRL3	CTRL3_300ID_ZORBAX_ZED_TT_03Apr2014	961.177	6214.73	3	29341	72	275.158	15.0129
QIVFEISK	CTRL3	D:\AmpK_Pass2\AmpKPass3\CTRL3	CTRL3_300ID_ZORBAX_ZED_TT_03Apr2014	961.177	6214.73	3	29341	58	247.093	14.0519
QIVFEISK	CTRL3	D:\AmpK_Pass2\AmpKPass3\CTRL3	CTRL3_300ID_ZORBAX_ZED_TT_03Apr2014	961.177	6214.73	3	29341	122	512.316	13.4219
QIVFEISK	CTRL3	D:\AmpK_Pass2\AmpKPass3\CTRL3	CTRL3_300ID_ZORBAX_ZED_TT_03Apr2014	961.177	6214.73	3	29341	120	510.644	13.0995
QIVFEISK	CTRL3	D:\AmpK_Pass2\AmpKPass3\CTRL3	CTRL3_300ID_ZORBAX_ZED_TT_03Apr2014	961.177	6214.73	3	29341	41	209.003	12.1472
QIVFEISK	CTRL3	D:\AmpK_Pass2\AmpKPass3\CTRL3	CTRL3_300ID_ZORBAX_ZED_TT_03Apr2014	961.177	6214.73	3	29341	117	451.407	11.788
QIVFEISK	CTRL3	D:\AmpK_Pass2\AmpKPass3\CTRL3	CTRL3_300ID_ZORBAX_ZED_TT_03Apr2014	961.177	6214.73	3	29341	21	167.221	11.1042
QIVFEISK	CTRL3	D:\AmpK_Pass2\AmpKPass3\CTRL3	CTRL3_300ID_ZORBAX_ZED_TT_03Apr2014	961.177	6214.73	3	29341	74	276.951	10.3485
QIVFEISK	CTRL3	D:\AmpK_Pass2\AmpKPass3\CTRL3	CTRL3_300ID_ZORBAX_ZED_TT_03Apr2014	961.177	6214.73	3	29341	38	204.979	9.90774
QIVFEISK	CTRL3	D:\AmpK_Pass2\AmpKPass3\CTRL3	CTRL3_300ID_ZORBAX_ZED_TT_03Apr2014	961.177	6214.73	3	29341	79	282.816	9.45488
QIVFEISK	CTRL3	D:\AmpK_Pass2\AmpKPass3\CTRL3	CTRL3_300ID_ZORBAX_ZED_TT_03Apr2014	961.177	6214.73	3	29341	46	220.071	9.42208
QIVFEISK	CTRL3	D:\AmpK_Pass2\AmpKPass3\CTRL3	CTRL3_300ID_ZORBAX_ZED_TT_03Apr2014	961.177	6214.73	3	29341	66	262.047	9.36266
QIVFEISK	CTRL3	D:\AmpK_Pass2\AmpKPass3\CTRL3	CTRL3_300ID_ZORBAX_ZED_TT_03Apr2014	961.177	6214.73	3	29341	84	291.366	9.22668
QIVFEISK	CTRL3	D:\AmpK_Pass2\AmpKPass3\CTRL3	CTRL3_300ID_ZORBAX_ZED_TT_03Apr2014	961.177	6214.73	3	29341	92	304.123	9.11701
QIVFEISK	CTRL3	D:\AmpK_Pass2\AmpKPass3\CTRL3	CTRL3_300ID_ZORBAX_ZED_TT_03Apr2014	961.177	6214.73	3	29341	102	340.847	8.74909
QIVFEISK	CTRL3	D:\AmpK_Pass2\AmpKPass3\CTRL3	CTRL3_300ID_ZORBAX_ZED_TT_03Apr2014	961.177	6214.73	3	29341	105	350.116	8.27683
QIVFEISK	CTRL3	D:\AmpK_Pass2\AmpKPass3\CTRL3	CTRL3_300ID_ZORBAX_ZED_TT_03Apr2014	961.177	6214.73	3	29341	114	421.593	8.19666
QIVFEISK	CTRL3	D:\AmpK_Pass2\AmpKPass3\CTRL3	CTRL3_300ID_ZORBAX_ZED_TT_03Apr2014	961.177	6214.73	3	29341	73	276.308	8.04088
QIVFEISK	CTRL3	D:\AmpK_Pass2\AmpKPass3\CTRL3	CTRL3_300ID_ZORBAX_ZED_TT_03Apr2014	961.177	6214.73	3	29341	86	293.914	7.62184
QIVFEISK	CTRL3	D:\AmpK_Pass2\AmpKPass3\CTRL3	CTRL3_300ID_ZORBAX_ZED_TT_03Apr2014	961.177	6214.73	3	29341	104	349.234	7.15121
QIVFEISK	CTRL3	D:\AmpK_Pass2\AmpKPass3\CTRL3	CTRL3_300ID_ZORBAX_ZED_TT_03Apr2014	961.177	6214.73	3	29341	10	145.119	6.85354
QIVFEISK	CTRL3	D:\AmpK_Pass2\AmpKPass3\CTRL3	CTRL3_300ID_ZORBAX_ZED_TT_03Apr2014	961.177	6214.73	3	29341	119	493.319	6.64382
QIVFEISK	CTRL3	D:\AmpK_Pass2\AmpKPass3\CTRL3	CTRL3_300ID_ZORBAX_ZED_TT_03Apr2014	961.177	6214.73	3	29341	15	156.192	6.53309
QIVFEISK	CTRL3	D:\AmpK_Pass2\AmpKPass3\CTRL3	CTRL3_300ID_ZORBAX_ZED_TT_03Apr2014	961.177	6214.73	3	29341	44	217.121	6.33107
QIVFEISK	CTRL3	D:\AmpK_Pass2\AmpKPass3\CTRL3	CTRL3_300ID_ZORBAX_ZED_TT_03Apr2014	961.177	6214.73	3	29341	67	263.154	6.31063
QIVFEISK	CTRL3	D:\AmpK_Pass2\AmpKPass3\CTRL3	CTRL3_300ID_ZORBAX_ZED_TT_03Apr2014	961.177	6214.73	3	29341	89	299.012	6.29626
QIVFEISK	CTRL3	D:\AmpK_Pass2\AmpKPass3\CTRL3	CTRL3_300ID_ZORBAX_ZED_TT_03Apr2014	961.177	6214.73	3	29341	39	205.726	6.20308
QIVFEISK	CTRL3	D:\AmpK_Pass2\AmpKPass3\CTRL3	CTRL3_300ID_ZORBAX_ZED_TT_03Apr2014	961.177	6214.73	3	29341	80	284.226	6.18464
QIVFEISK	CTRL3	D:\AmpK_Pass2\AmpKPass3\CTRL3	CTRL3_300ID_ZORBAX_ZED_TT_03Apr2014	961.177	6214.73	3	29341	101	339.16	6.10476
QIVFEISK	CTRL3	D:\AmpK_Pass2\AmpKPass3\CTRL3	CTRL3_300ID_ZORBAX_ZED_TT_03Apr2014	961.177	6214.73	3	29341	88	297.796	5.77034
QIVFEISK	CTRL3	D:\AmpK_Pass2\AmpKPass3\CTRL3	CTRL3_300ID_ZORBAX_ZED_TT_03Apr2014	961.177	6214.73	3	29341	97	309.185	5.72724
QIVFEISK	CTRL3	D:\AmpK_Pass2\AmpKPass3\CTRL3	CTRL3_300ID_ZORBAX_ZED_TT_03Apr2014	961.177	6214.73	3	29341	83	289.287	5.67721
QIVFEISK	CTRL3	D:\AmpK_Pass2\AmpKPass3\CTRL3	CTRL3_300ID_ZORBAX_ZED_TT_03Apr2014	961.177	6214.73	3	29341	61	251.09	5.6473
QIVFEISK	CTRL3	D:\AmpK_Pass2\AmpKPass3\CTRL3	CTRL3_300ID_ZORBAX_ZED_TT_03Apr2014	961.177	6214.73	3	29341	9	136.679	5.57643
QIVFEISK	CTRL3	D:\AmpK_Pass2\AmpKPass3\CTRL3	CTRL3_300ID_ZORBAX_ZED_TT_03Apr2014	961.177	6214.73	3	29341	32	190.984	5.53579
QIVFEISK	CTRL3	D:\AmpK_Pass2\AmpKPass3\CTRL3	CTRL3_300ID_ZORBAX_ZED_TT_03Apr2014	961.177	6214.73	3	29341	95	307.172	5.48412
QIVFEISK	CTRL3	D:\AmpK_Pass2\AmpKPass3\CTRL3	CTRL3_300ID_ZORBAX_ZED_TT_03Apr2014	961.177	6214.73	3	29341	93	304.938	5.38271
QIVFEISK	CTRL3	D:\AmpK_Pass2\AmpKPass3\CTRL3	CTRL3_300ID_ZORBAX_ZED_TT_03Apr2014	961.177	6214.73	3	29341	26	178.056	5.08935
QIVFEISK	CTRL3	D:\AmpK_Pass2\AmpKPass3\CTRL3	CTRL3_300ID_ZORBAX_ZED_TT_03Apr2014	961.177	6214.73	3	29341	51	233.131	5.07753
QIVFEISK	CTRL3	D:\AmpK_Pass2\AmpKPass3\CTRL3	CTRL3_300ID_ZORBAX_ZED_TT_03Apr2014	961.177	6214.73	3	29341	109	381.122	5.03328
QIVFEISK	CTRL3	D:\AmpK_Pass2\AmpKPass3\CTRL3	CTRL3_300ID_ZORBAX_ZED_TT_03Apr2014	961.177	6214.73	3	29341	87	296.812	4.74943
QIVFEISK	CTRL3	D:\AmpK_Pass2\AmpKPass3\CTRL3	CTRL3_300ID_ZORBAX_ZED_TT_03Apr2014	961.177	6214.73	3	29341	22	170.095	4.69309
QIVFEISK	CTRL3	D:\AmpK_Pass2\AmpKPass3\CTRL3	CTRL3_300ID_ZORBAX_ZED_TT_03Apr2014	961.177	6214.73	3	29341	64	260.173	4.55323
QIVFEISK	CTRL3	D:\AmpK_Pass2\AmpKPass3\CTRL3	CTRL3_300ID_ZORBAX_ZED_TT_03Apr2014	961.177	6214.73	3	29341	57	243.088	4.52833
QIVFEISK	CTRL3	D:\AmpK_Pass2\AmpKPass3\CTRL3	CTRL3_300ID_ZORBAX_ZED_TT_03Apr2014	961.177	6214.73	3	29341	96	308.218	4.38943
QIVFEISK	CTRL3	D:\AmpK_Pass2\AmpKPass3\CTRL3	CTRL3_300ID_ZORBAX_ZED_TT_03Apr2014	961.177	6214.73	3	29341	18	162.003	4.14084
QIVFEISK	CTRL3	D:\AmpK_Pass2\AmpKPass3\CTRL3	CTRL3_300ID_ZORBAX_ZED_TT_03Apr2014	961.177	6214.73	3	29341	68	264.349	4.13725
QIVFEISK	CTRL3	D:\AmpK_Pass2\AmpKPass3\CTRL3	CTRL3_300ID_ZORBAX_ZED_TT_03Apr2014	961.177	6214.73	3	29341	94	306.497	4.118
QIVFEISK	CTRL3	D:\AmpK_Pass2\AmpKPass3\CTRL3	CTRL3_300ID_ZORBAX_ZED_TT_03Apr2014	961.177	6214.73	3	29341	34	193.222	4.0312
QIVFEISK	CTRL3	D:\AmpK_Pass2\AmpKPass3\CTRL3	CTRL3_300ID_ZORBAX_ZED_TT_03Apr2014	961.177	6214.73	3	29341	19	163.028	3.96242
QIVFEISK	CTRL3	D:\AmpK_Pass2\AmpKPass3\CTRL3	CTRL3_300ID_ZORBAX_ZED_TT_03Apr2014	961.177	6214.73	3	29341	71	271.382	3.52411
QIVFEISK	CTRL3	D:\AmpK_Pass2\AmpKPass3\CTRL3	CTRL3_300ID_ZORBAX_ZED_TT_03Apr2014	961.177	6214.73	3	29341	110	391.287	3.52214
QIVFEISK	CTRL3	D:\AmpK_Pass2\AmpKPass3\CTRL3	CTRL3_300ID_ZORBAX_ZED_TT_03Apr2014	961.177	6214.73	3	29341	106	351.367	3.4142
QIVFEISK	CTRL3	D:\AmpK_Pass2\AmpKPass3\CTRL3	CTRL3_300ID_ZORBAX_ZED_TT_03Apr2014	961.177	6214.73	3	29341	20	165.238	3.40859
QIVFEISK	CTRL3	D:\AmpK_Pass2\AmpKPass3\CTRL3	CTRL3_300ID_ZORBAX_ZED_TT_03Apr2014	961.177	6214.73	3	29341	6	126.922	3.02495
QIVFEISK	CTRL3	D:\AmpK_Pass2\AmpKPass3\CTRL3	CTRL3_300ID_ZORBAX_ZED_TT_03Apr2014	961.177	6214.73	3	29341	56	242.167	2.95865
QIVFEISK	CTRL3	D:\AmpK_Pass2\AmpKPass3\CTRL3	CTRL3_300ID_ZORBAX_ZED_TT_03Apr2014	961.177	6214.73	3	29341	3	120.708	2.86186
QIVFEISK	CTRL3	D:\AmpK_Pass2\AmpKPass3\CTRL3	CTRL3_300ID_ZORBAX_ZED_TT_03Apr2014	961.177	6214.73	3	29341	2	110.95	2.81191
QIVFEISK	CTRL3	D:\AmpK_Pass2\AmpKPass3\CTRL3	CTRL3_300ID_ZORBAX_ZED_TT_03Apr2014	961.177	6214.73	3	29341	40	207.194	2.65144
QIVFEISK	CTRL3	D:\AmpK_Pass2\AmpKPass3\CTRL3	CTRL3_300ID_ZORBAX_ZED_TT_03Apr2014	961.177	6214.73	3	29341	24	173.194	2.54147
QIVFEISK	CTRL3	D:\AmpK_Pass2\AmpKPass3\CTRL3	CTRL3_300ID_ZORBAX_ZED_TT_03Apr2014	961.177	6214.73	3	29341	27	178.951	2.52977
QIVFEISK	CTRL3	D:\AmpK_Pass2\AmpKPass3\CTRL3	CTRL3_300ID_ZORBAX_ZED_TT_03Apr2014	961.177	6214.73	3	29341	7	129.173	2.50585
QIVFEISK	CTRL3	D:\AmpK_Pass2\AmpKPass3\CTRL3	CTRL3_300ID_ZORBAX_ZED_TT_03Apr2014	961.177	6214.73	3	29341	31	187.168	2.34827
QIVFEISK	CTRL3	D:\AmpK_Pass2\AmpKPass3\CTRL3	CTRL3_300ID_ZORBAX_ZED_TT_03Apr2014	961.177	6214.73	3	29341	36	199.027	2.28425
QIVFEISK	CTRL3	D:\AmpK_Pass2\AmpKPass3\CTRL3	CTRL3_300ID_ZORBAX_ZED_TT_03Apr2014	961.177	6214.73	3	29341	48	229.012	2.27467
QIVFEISK	CTRL3	D:\AmpK_Pass2\AmpKPass3\CTRL3	CTRL3_300ID_ZORBAX_ZED_TT_03Apr2014	961.177	6214.73	3	29341	49	231.417	2.27352
QIVFEISK	CTRL3	D:\AmpK_Pass2\AmpKPass3\CTRL3	CTRL3_300ID_ZORBAX_ZED_TT_03Apr2014	961.177	6214.73	3	29341	111	403.067	2.23818
QIVFEISK	CTRL3	D:\AmpK_Pass2\AmpKPass3\CTRL3	CTRL3_300ID_ZORBAX_ZED_TT_03Apr2014	961.177	6214.73	3	29341	54	238.012	2.17679
QIVFEISK	CTRL3	D:\AmpK_Pass2\AmpKPass3\CTRL3	CTRL3_300ID_ZORBAX_ZED_TT_03Apr2014	961.177	6214.73	3	29341	13	152.947	2.10964
QIVFEISK	CTRL3	D:\AmpK_Pass2\AmpKPass3\CTRL3	CTRL3_300ID_ZORBAX_ZED_TT_03Apr2014	961.177	6214.73	3	29341	82	286.014	2.06723
QIVFEISK	CTRL3	D:\AmpK_Pass2\AmpKPass3\CTRL3	CTRL3_300ID_ZORBAX_ZED_TT_03Apr2014	961.177	6214.73	3	29341	118	471.288	1.95529
QIVFEISK	CTRL3	D:\AmpK_Pass2\AmpKPass3\CTRL3	CTRL3_300ID_ZORBAX_ZED_TT_03Apr2014	961.177	6214.73	3	29341	8	135.155	1.90895
QIVFEISK	CTRL3	D:\AmpK_Pass2\AmpKPass3\CTRL3	CTRL3_300ID_ZORBAX_ZED_TT_03Apr2014	961.177	6214.73	3	29341	47	222.217	1.8747
QIVFEISK	CTRL3	D:\AmpK_Pass2\AmpKPass3\CTRL3	CTRL3_300ID_ZORBAX_ZED_TT_03Apr2014	961.177	6214.73	3	29341	42	214.627	1.8444
QIVFEISK	CTRL3	D:\AmpK_Pass2\AmpKPass3\CTRL3	CTRL3_300ID_ZORBAX_ZED_TT_03Apr2014	961.177	6214.73	3	29341	59	249.003	1.67248
QIVFEISK	CTRL3	D:\AmpK_Pass2\AmpKPass3\CTRL3	CTRL3_300ID_ZORBAX_ZED_TT_03Apr2014	961.177	6214.73	3	29341	107	363.011	1.63152
QIVFEISK	CTRL3	D:\AmpK_Pass2\AmpKPass3\CTRL3	CTRL3_300ID_ZORBAX_ZED_TT_03Apr2014	961.177	6214.73	3	29341	60	249.938	1.62951
QIVFEISK	CTRL3	D:\AmpK_Pass2\AmpKPass3\CTRL3	CTRL3_300ID_ZORBAX_ZED_TT_03Apr2014	961.177	6214.73	3	29341	16	160.137	1.62855
QIVFEISK	CTRL3	D:\AmpK_Pass2\AmpKPass3\CTRL3	CTRL3_300ID_ZORBAX_ZED_TT_03Apr2014	961.177	6214.73	3	29341	70	267.01	1.60102
QIVFEISK	CTRL3	D:\AmpK_Pass2\AmpKPass3\CTRL3	CTRL3_300ID_ZORBAX_ZED_TT_03Apr2014	961.177	6214.73	3	29341	4	123.069	1.58134
QIVFEISK	CTRL3	D:\AmpK_Pass2\AmpKPass3\CTRL3	CTRL3_300ID_ZORBAX_ZED_TT_03Apr2014	961.177	6214.73	3	29341	115	422.41	1.52806
QIVFEISK	CTRL3	D:\AmpK_Pass2\AmpKPass3\CTRL3	CTRL3_300ID_ZORBAX_ZED_TT_03Apr2014	961.177	6214.73	3	29341	37	202.129	1.51714
QIVFEISK	CTRL3	D:\AmpK_Pass2\AmpKPass3\CTRL3	CTRL3_300ID_ZORBAX_ZED_TT_03Apr2014	961.177	6214.73	3	29341	35	197.963	1.44278
QIVFEISK	CTRL3	D:\AmpK_Pass2\AmpKPass3\CTRL3	CTRL3_300ID_ZORBAX_ZED_TT_03Apr2014	961.177	6214.73	3	29341	5	124.985	1.36267
QIVFEISK	CTRL3	D:\AmpK_Pass2\AmpKPass3\CTRL3	CTRL3_300ID_ZORBAX_ZED_TT_03Apr2014	961.177	6214.73	3	29341	29	180.821	1.36084
QIVFEISK	CTRL3	D:\AmpK_Pass2\AmpKPass3\CTRL3	CTRL3_300ID_ZORBAX_ZED_TT_03Apr2014	961.177	6214.73	3	29341	124	531.021	1.35408
QIVFEISK	CTRL3	D:\AmpK_Pass2\AmpKPass3\CTRL3	CTRL3_300ID_ZORBAX_ZED_TT_03Apr2014	961.177	6214.73	3	29341	25	174.262	1.30295
QIVFEISK	CTRL3	D:\AmpK_Pass2\AmpKPass3\CTRL3	CTRL3_300ID_ZORBAX_ZED_TT_03Apr2014	961.177	6214.73	3	29341	50	232.397	1.29769
QIVFEISK	CTRL3	D:\AmpK_Pass2\AmpKPass3\CTRL3	CTRL3_300ID_ZORBAX_ZED_TT_03Apr2014	961.177	6214.73	3	29341	43	215.396	1.29752
QIVFEISK	CTRL3	D:\AmpK_Pass2\AmpKPass3\CTRL3	CTRL3_300ID_ZORBAX_ZED_TT_03Apr2014	961.177	6214.73	3	29341	14	155.241	1.20317
QIVFEISK	CTRL3	D:\AmpK_Pass2\AmpKPass3\CTRL3	CTRL3_300ID_ZORBAX_ZED_TT_03Apr2014	961.177	6214.73	3	29341	123	529.354	1.19308
QIVFEISK	CTRL3	D:\AmpK_Pass2\AmpKPass3\CTRL3	CTRL3_300ID_ZORBAX_ZED_TT_03Apr2014	961.177	6214.73	3	29341	98	310.347	1.19228
QIVFEISK	CTRL3	D:\AmpK_Pass2\AmpKPass3\CTRL3	CTRL3_300ID_ZORBAX_ZED_TT_03Apr2014	961.177	6214.73	3	29341	11	146.038	1.12008
QIVFEISK	CTRL3	D:\AmpK_Pass2\AmpKPass3\CTRL3	CTRL3_300ID_ZORBAX_ZED_TT_03Apr2014	961.177	6214.73	3	29341	30	183.334	1.10801
QIVFEISK	CTRL3	D:\AmpK_Pass2\AmpKPass3\CTRL3	CTRL3_300ID_ZORBAX_ZED_TT_03Apr2014	961.177	6214.73	3	29341	55	239.523	1.08347
QIVFEISK	CTRL3	D:\AmpK_Pass2\AmpKPass3\CTRL3	CTRL3_300ID_ZORBAX_ZED_TT_03Apr2014	961.177	6214.73	3	29341	45	218.292	1.08213
QIVFEISK	CTRL3	D:\AmpK_Pass2\AmpKPass3\CTRL3	CTRL3_300ID_ZORBAX_ZED_TT_03Apr2014	961.177	6214.73	3	29341	28	180.183	0.974106
QIVFEISK	CTRL3	D:\AmpK_Pass2\AmpKPass3\CTRL3	CTRL3_300ID_ZORBAX_ZED_TT_03Apr2014	961.177	6214.73	3	29341	116	442.287	0.972303
QIVFEISK	CTRL3	D:\AmpK_Pass2\AmpKPass3\CTRL3	CTRL3_300ID_ZORBAX_ZED_TT_03Apr2014	961.177	6214.73	3	29341	100	322.579	0.872759
QIVFEISK	CTRL3	D:\AmpK_Pass2\AmpKPass3\CTRL3	CTRL3_300ID_ZORBAX_ZED_TT_03Apr2014	961.177	6214.73	3	29341	33	192.042	0.86426
QIVFEISK	CTRL3	D:\AmpK_Pass2\AmpKPass3\CTRL3	CTRL3_300ID_ZORBAX_ZED_TT_03Apr2014	961.177	6214.73	3	29341	1	105.013	0.756218
QIVFEISK	CTRL3	D:\AmpK_Pass2\AmpKPass3\CTRL3	CTRL3_300ID_ZORBAX_ZED_TT_03Apr2014	961.177	6214.73	3	29341	113	410.527	0.755844
QIVFEISK	CTRL3	D:\AmpK_Pass2\AmpKPass3\CTRL3	CTRL3_300ID_ZORBAX_ZED_TT_03Apr2014	961.177	6214.73	3	29341	17	161.022	0.646932
VILFTMHNNR	CTRL2	D:\AmpK_Pass2\AmpKPass3\CTRL2	CTRL2_300ID_ZORBAX_ZED_TT_03Apr2014	1245.8	3747.42	3	31543	100	371.32	106.801
VILFTMHNNR	CTRL2	D:\AmpK_Pass2\AmpKPass3\CTRL2	CTRL2_300ID_ZORBAX_ZED_TT_03Apr2014	1245.8	3747.42	3	31543	85	335.172	93.0287
VILFTMHNNR	CTRL2	D:\AmpK_Pass2\AmpKPass3\CTRL2	CTRL2_300ID_ZORBAX_ZED_TT_03Apr2014	1245.8	3747.42	3	31543	93	353.331	80.529
VILFTMHNNR	CTRL2	D:\AmpK_Pass2\AmpKPass3\CTRL2	CTRL2_300ID_ZORBAX_ZED_TT_03Apr2014	1245.8	3747.42	3	31543	113	398.242	73.0347
VILFTMHNNR	CTRL2	D:\AmpK_Pass2\AmpKPass3\CTRL2	CTRL2_300ID_ZORBAX_ZED_TT_03Apr2014	1245.8	3747.42	3	31543	107	381.157	45.8254
VILFTMHNNR	CTRL2	D:\AmpK_Pass2\AmpKPass3\CTRL2	CTRL2_300ID_ZORBAX_ZED_TT_03Apr2014	1245.8	3747.42	3	31543	114	399.257	41.9564
VILFTMHNNR	CTRL2	D:\AmpK_Pass2\AmpKPass3\CTRL2	CTRL2_300ID_ZORBAX_ZED_TT_03Apr2014	1245.8	3747.42	3	31543	118	407.256	39.5177
VILFTMHNNR	CTRL2	D:\AmpK_Pass2\AmpKPass3\CTRL2	CTRL2_300ID_ZORBAX_ZED_TT_03Apr2014	1245.8	3747.42	3	31543	79	327.247	32.1762
VILFTMHNNR	CTRL2	D:\AmpK_Pass2\AmpKPass3\CTRL2	CTRL2_300ID_ZORBAX_ZED_TT_03Apr2014	1245.8	3747.42	3	31543	117	403.291	30.0287
VILFTMHNNR	CTRL2	D:\AmpK_Pass2\AmpKPass3\CTRL2	CTRL2_300ID_ZORBAX_ZED_TT_03Apr2014	1245.8	3747.42	3	31543	120	434.499	25.9116
VILFTMHNNR	CTRL2	D:\AmpK_Pass2\AmpKPass3\CTRL2	CTRL2_300ID_ZORBAX_ZED_TT_03Apr2014	1245.8	3747.42	3	31543	112	397.071	18.4303
VILFTMHNNR	CTRL2	D:\AmpK_Pass2\AmpKPass3\CTRL2	CTRL2_300ID_ZORBAX_ZED_TT_03Apr2014	1245.8	3747.42	3	31543	121	442.969	17.8982
VILFTMHNNR	CTRL2	D:\AmpK_Pass2\AmpKPass3\CTRL2	CTRL2_300ID_ZORBAX_ZED_TT_03Apr2014	1245.8	3747.42	3	31543	45	267.452	17.7572
VILFTMHNNR	CTRL2	D:\AmpK_Pass2\AmpKPass3\CTRL2	CTRL2_300ID_ZORBAX_ZED_TT_03Apr2014	1245.8	3747.42	3	31543	99	370.032	13.769
VILFTMHNNR	CTRL2	D:\AmpK_Pass2\AmpKPass3\CTRL2	CTRL2_300ID_ZORBAX_ZED_TT_03Apr2014	1245.8	3747.42	3	31543	109	386.747	13.7021
VILFTMHNNR	CTRL2	D:\AmpK_Pass2\AmpKPass3\CTRL2	CTRL2_300ID_ZORBAX_ZED_TT_03Apr2014	1245.8	3747.42	3	31543	92	352.703	12.8274
VILFTMHNNR	CTRL2	D:\AmpK_Pass2\AmpKPass3\CTRL2	CTRL2_300ID_ZORBAX_ZED_TT_03Apr2014	1245.8	3747.42	3	31543	62	299.211	11.6212
VILFTMHNNR	CTRL2	D:\AmpK_Pass2\AmpKPass3\CTRL2	CTRL2_300ID_ZORBAX_ZED_TT_03Apr2014	1245.8	3747.42	3	31543	116	401.966	11.3886
VILFTMHNNR	CTRL2	D:\AmpK_Pass2\AmpKPass3\CTRL2	CTRL2_300ID_ZORBAX_ZED_TT_03Apr2014	1245.8	3747.42	3	31543	104	375.237	10.8756
VILFTMHNNR	CTRL2	D:\AmpK_Pass2\AmpKPass3\CTRL2	CTRL2_300ID_ZORBAX_ZED_TT_03Apr2014	1245.8	3747.42	3	31543	69	312.262	10.5429
VILFTMHNNR	CTRL2	D:\AmpK_Pass2\AmpKPass3\CTRL2	CTRL2_300ID_ZORBAX_ZED_TT_03Apr2014	1245.8	3747.42	3	31543	94	356.247	10.5203
VILFTMHNNR	CTRL2	D:\AmpK_Pass2\AmpKPass3\CTRL2	CTRL2_300ID_ZORBAX_ZED_TT_03Apr2014	1245.8	3747.42	3	31543	58	286.028	10.1317
VILFTMHNNR	CTRL2	D:\AmpK_Pass2\AmpKPass3\CTRL2	CTRL2_300ID_ZORBAX_ZED_TT_03Apr2014	1245.8	3747.42	3	31543	37	253.199	9.9474
VILFTMHNNR	CTRL2	D:\AmpK_Pass2\AmpKPass3\CTRL2	CTRL2_300ID_ZORBAX_ZED_TT_03Apr2014	1245.8	3747.42	3	31543	23	216.095	9.74677
VILFTMHNNR	CTRL2	D:\AmpK_Pass2\AmpKPass3\CTRL2	CTRL2_300ID_ZORBAX_ZED_TT_03Apr2014	1245.8	3747.42	3	31543	127	572.449	9.6196
VILFTMHNNR	CTRL2	D:\AmpK_Pass2\AmpKPass3\CTRL2	CTRL2_300ID_ZORBAX_ZED_TT_03Apr2014	1245.8	3747.42	3	31543	29	237.236	9.49265
VILFTMHNNR	CTRL2	D:\AmpK_Pass2\AmpKPass3\CTRL2	CTRL2_300ID_ZORBAX_ZED_TT_03Apr2014	1245.8	3747.42	3	31543	70	314.142	8.88884
VILFTMHNNR	CTRL2	D:\AmpK_Pass2\AmpKPass3\CTRL2	CTRL2_300ID_ZORBAX_ZED_TT_03Apr2014	1245.8	3747.42	3	31543	96	363.359	8.4935
VILFTMHNNR	CTRL2	D:\AmpK_Pass2\AmpKPass3\CTRL2	CTRL2_300ID_ZORBAX_ZED_TT_03Apr2014	1245.8	3747.42	3	31543	21	213.73	8.04821
VILFTMHNNR	CTRL2	D:\AmpK_Pass2\AmpKPass3\CTRL2	CTRL2_300ID_ZORBAX_ZED_TT_03Apr2014	1245.8	3747.42	3	31543	8	182.917	7.68539
VILFTMHNNR	CTRL2	D:\AmpK_Pass2\AmpKPass3\CTRL2	CTRL2_300ID_ZORBAX_ZED_TT_03Apr2014	1245.8	3747.42	3	31543	54	277.165	7.65488
VILFTMHNNR	CTRL2	D:\AmpK_Pass2\AmpKPass3\CTRL2	CTRL2_300ID_ZORBAX_ZED_TT_03Apr2014	1245.8	3747.42	3	31543	103	374.39	7.45742
VILFTMHNNR	CTRL2	D:\AmpK_Pass2\AmpKPass3\CTRL2	CTRL2_300ID_ZORBAX_ZED_TT_03Apr2014	1245.8	3747.42	3	31543	136	718.495	7.22251
VILFTMHNNR	CTRL2	D:\AmpK_Pass2\AmpKPass3\CTRL2	CTRL2_300ID_ZORBAX_ZED_TT_03Apr2014	1245.8	3747.42	3	31543	47	269.538	6.82073
VILFTMHNNR	CTRL2	D:\AmpK_Pass2\AmpKPass3\CTRL2	CTRL2_300ID_ZORBAX_ZED_TT_03Apr2014	1245.8	3747.42	3	31543	126	563.888	6.80479
VILFTMHNNR	CTRL2	D:\AmpK_Pass2\AmpKPass3\CTRL2	CTRL2_300ID_ZORBAX_ZED_TT_03Apr2014	1245.8	3747.42	3	31543	133	668.518	5.83907
VILFTMHNNR	CTRL2	D:\AmpK_Pass2\AmpKPass3\CTRL2	CTRL2_300ID_ZORBAX_ZED_TT_03Apr2014	1245.8	3747.42	3	31543	130	601.323	5.69628
VILFTMHNNR	CTRL2	D:\AmpK_Pass2\AmpKPass3\CTRL2	CTRL2_300ID_ZORBAX_ZED_TT_03Apr2014	1245.8	3747.42	3	31543	97	364.787	5.69592
VILFTMHNNR	CTRL2	D:\AmpK_Pass2\AmpKPass3\CTRL2	CTRL2_300ID_ZORBAX_ZED_TT_03Apr2014	1245.8	3747.42	3	31543	124	539.285	5.50637
VILFTMHNNR	CTRL2	D:\AmpK_Pass2\AmpKPass3\CTRL2	CTRL2_300ID_ZORBAX_ZED_TT_03Apr2014	1245.8	3747.42	3	31543	43	265.354	5.4983
VILFTMHNNR	CTRL2	D:\AmpK_Pass2\AmpKPass3\CTRL2	CTRL2_300ID_ZORBAX_ZED_TT_03Apr2014	1245.8	3747.42	3	31543	101	372.041	5.09014
VILFTMHNNR	CTRL2	D:\AmpK_Pass2\AmpKPass3\CTRL2	CTRL2_300ID_ZORBAX_ZED_TT_03Apr2014	1245.8	3747.42	3	31543	102	373.694	4.98782
VILFTMHNNR	CTRL2	D:\AmpK_Pass2\AmpKPass3\CTRL2	CTRL2_300ID_ZORBAX_ZED_TT_03Apr2014	1245.8	3747.42	3	31543	95	357.241	4.96725
VILFTMHNNR	CTRL2	D:\AmpK_Pass2\AmpKPass3\CTRL2	CTRL2_300ID_ZORBAX_ZED_TT_03Apr2014	1245.8	3747.42	3	31543	65	304.941	4.94005
VILFTMHNNR	CTRL2	D:\AmpK_Pass2\AmpKPass3\CTRL2	CTRL2_300ID_ZORBAX_ZED_TT_03Apr2014	1245.8	3747.42	3	31543	86	337.301	4.86899
VILFTMHNNR	CTRL2	D:\AmpK_Pass2\AmpKPass3\CTRL2	CTRL2_300ID_ZORBAX_ZED_TT_03Apr2014	1245.8	3747.42	3	31543	32	243.819	4.67614
VILFTMHNNR	CTRL2	D:\AmpK_Pass2\AmpKPass3\CTRL2	CTRL2_300ID_ZORBAX_ZED_TT_03Apr2014	1245.8	3747.42	3	31543	18	207.066	4.61462
VILFTMHNNR	CTRL2	D:\AmpK_Pass2\AmpKPass3\CTRL2	CTRL2_300ID_ZORBAX_ZED_TT_03Apr2014	1245.8	3747.42	3	31543	110	392.603	4.55758
VILFTMHNNR	CTRL2	D:\AmpK_Pass2\AmpKPass3\CTRL2	CTRL2_300ID_ZORBAX_ZED_TT_03Apr2014	1245.8	3747.42	3	31543	33	245.19	4.50115
VILFTMHNNR	CTRL2	D:\AmpK_Pass2\AmpKPass3\CTRL2	CTRL2_300ID_ZORBAX_ZED_TT_03Apr2014	1245.8	3747.42	3	31543	91	351.188	4.48821
VILFTMHNNR	CTRL2	D:\AmpK_Pass2\AmpKPass3\CTRL2	CTRL2_300ID_ZORBAX_ZED_TT_03Apr2014	1245.8	3747.42	3	31543	61	296.164	4.28839
VILFTMHNNR	CTRL2	D:\AmpK_Pass2\AmpKPass3\CTRL2	CTRL2_300ID_ZORBAX_ZED_TT_03Apr2014	1245.8	3747.42	3	31543	56	283.209	4.28159
VILFTMHNNR	CTRL2	D:\AmpK_Pass2\AmpKPass3\CTRL2	CTRL2_300ID_ZORBAX_ZED_TT_03Apr2014	1245.8	3747.42	3	31543	89	343.345	4.10278
VILFTMHNNR	CTRL2	D:\AmpK_Pass2\AmpKPass3\CTRL2	CTRL2_300ID_ZORBAX_ZED_TT_03Apr2014	1245.8	3747.42	3	31543	80	328.202	3.95414
VILFTMHNNR	CTRL2	D:\AmpK_Pass2\AmpKPass3\CTRL2	CTRL2_300ID_ZORBAX_ZED_TT_03Apr2014	1245.8	3747.42	3	31543	51	274.168	3.91556
VILFTMHNNR	CTRL2	D:\AmpK_Pass2\AmpKPass3\CTRL2	CTRL2_300ID_ZORBAX_ZED_TT_03Apr2014	1245.8	3747.42	3	31543	44	266.232	3.65789
VILFTMHNNR	CTRL2	D:\AmpK_Pass2\AmpKPass3\CTRL2	CTRL2_300ID_ZORBAX_ZED_TT_03Apr2014	1245.8	3747.42	3	31543	98	369.036	3.51741
VILFTMHNNR	CTRL2	D:\AmpK_Pass2\AmpKPass3\CTRL2	CTRL2_300ID_ZORBAX_ZED_TT_03Apr2014	1245.8	3747.42	3	31543	108	383.486	3.51069
VILFTMHNNR	CTRL2	D:\AmpK_Pass2\AmpKPass3\CTRL2	CTRL2_300ID_ZORBAX_ZED_TT_03Apr2014	1245.8	3747.42	3	31543	26	231.053	3.4517
VILFTMHNNR	CTRL2	D:\AmpK_Pass2\AmpKPass3\CTRL2	CTRL2_300ID_ZORBAX_ZED_TT_03Apr2014	1245.8	3747.42	3	31543	5	155.186	3.4137
VILFTMHNNR	CTRL2	D:\AmpK_Pass2\AmpKPass3\CTRL2	CTRL2_300ID_ZORBAX_ZED_TT_03Apr2014	1245.8	3747.42	3	31543	76	324.188	3.2929
VILFTMHNNR	CTRL2	D:\AmpK_Pass2\AmpKPass3\CTRL2	CTRL2_300ID_ZORBAX_ZED_TT_03Apr2014	1245.8	3747.42	3	31543	13	193.09	3.23019
VILFTMHNNR	CTRL2	D:\AmpK_Pass2\AmpKPass3\CTRL2	CTRL2_300ID_ZORBAX_ZED_TT_03Apr2014	1245.8	3747.42	3	31543	50	272.201	3.19672
VILFTMHNNR	CTRL2	D:\AmpK_Pass2\AmpKPass3\CTRL2	CTRL2_300ID_ZORBAX_ZED_TT_03Apr2014	1245.8	3747.42	3	31543	42	261.308	3.18304
VILFTMHNNR	CTRL2	D:\AmpK_Pass2\AmpKPass3\CTRL2	CTRL2_300ID_ZORBAX_ZED_TT_03Apr2014	1245.8	3747.42	3	31543	3	143.002	3.12049
VILFTMHNNR	CTRL2	D:\AmpK_Pass2\AmpKPass3\CTRL2	CTRL2_300ID_ZORBAX_ZED_TT_03Apr2014	1245.8	3747.42	3	31543	74	321.288	3.09287
VILFTMHNNR	CTRL2	D:\AmpK_Pass2\AmpKPass3\CTRL2	CTRL2_300ID_ZORBAX_ZED_TT_03Apr2014	1245.8	3747.42	3	31543	7	173.248	3.02513
VILFTMHNNR	CTRL2	D:\AmpK_Pass2\AmpKPass3\CTRL2	CTRL2_300ID_ZORBAX_ZED_TT_03Apr2014	1245.8	3747.42	3	31543	137	725.712	2.96156
VILFTMHNNR	CTRL2	D:\AmpK_Pass2\AmpKPass3\CTRL2	CTRL2_300ID_ZORBAX_ZED_TT_03Apr2014	1245.8	3747.42	3	31543	16	202.091	2.94397
VILFTMHNNR	CTRL2	D:\AmpK_Pass2\AmpKPass3\CTRL2	CTRL2_300ID_ZORBAX_ZED_TT_03Apr2014	1245.8	3747.42	3	31543	128	586.517	2.88595
VILFTMHNNR	CTRL2	D:\AmpK_Pass2\AmpKPass3\CTRL2	CTRL2_300ID_ZORBAX_ZED_TT_03Apr2014	1245.8	3747.42	3	31543	2	132.944	2.88291
VILFTMHNNR	CTRL2	D:\AmpK_Pass2\AmpKPass3\CTRL2	CTRL2_300ID_ZORBAX_ZED_TT_03Apr2014	1245.8	3747.42	3	31543	78	325.91	2.86925
VILFTMHNNR	CTRL2	D:\AmpK_Pass2\AmpKPass3\CTRL2	CTRL2_300ID_ZORBAX_ZED_TT_03Apr2014	1245.8	3747.42	3	31543	24	223.795	2.86845
VILFTMHNNR	CTRL2	D:\AmpK_Pass2\AmpKPass3\CTRL2	CTRL2_300ID_ZORBAX_ZED_TT_03Apr2014	1245.8	3747.42	3	31543	83	332.556	2.85735
VILFTMHNNR	CTRL2	D:\AmpK_Pass2\AmpKPass3\CTRL2	CTRL2_300ID_ZORBAX_ZED_TT_03Apr2014	1245.8	3747.42	3	31543	48	270.38	2.64782
VILFTMHNNR	CTRL2	D:\AmpK_Pass2\AmpKPass3\CTRL2	CTRL2_300ID_ZORBAX_ZED_TT_03Apr2014	1245.8	3747.42	3	31543	111	396.103	2.64189
VILFTMHNNR	CTRL2	D:\AmpK_Pass2\AmpKPass3\CTRL2	CTRL2_300ID_ZORBAX_ZED_TT_03Apr2014	1245.8	3747.42	3	31543	63	300.026	2.55384
VILFTMHNNR	CTRL2	D:\AmpK_Pass2\AmpKPass3\CTRL2	CTRL2_300ID_ZORBAX_ZED_TT_03Apr2014	1245.8	3747.42	3	31543	11	191.189	2.53281
VILFTMHNNR	CTRL2	D:\AmpK_Pass2\AmpKPass3\CTRL2	CTRL2_300ID_ZORBAX_ZED_TT_03Apr2014	1245.8	3747.42	3	31543	134	703.596	2.44825
VILFTMHNNR	CTRL2	D:\AmpK_Pass2\AmpKPass3\CTRL2	CTRL2_300ID_ZORBAX_ZED_TT_03Apr2014	1245.8	3747.42	3	31543	131	616.376	2.31091
VILFTMHNNR	CTRL2	D:\AmpK_Pass2\AmpKPass3\CTRL2	CTRL2_300ID_ZORBAX_ZED_TT_03Apr2014	1245.8	3747.42	3	31543	67	307.601	2.20761
VILFTMHNNR	CTRL2	D:\AmpK_Pass2\AmpKPass3\CTRL2	CTRL2_300ID_ZORBAX_ZED_TT_03Apr2014	1245.8	3747.42	3	31543	1	127.052	2.20547
VILFTMHNNR	CTRL2	D:\AmpK_Pass2\AmpKPass3\CTRL2	CTRL2_300ID_ZORBAX_ZED_TT_03Apr2014	1245.8	3747.42	3	31543	20	210.833	2.15461
VILFTMHNNR	CTRL2	D:\AmpK_Pass2\AmpKPass3\CTRL2	CTRL2_300ID_ZORBAX_ZED_TT_03Apr2014	1245.8	3747.42	3	31543	28	236.085	2.13703
VILFTMHNNR	CTRL2	D:\AmpK_Pass2\AmpKPass3\CTRL2	CTRL2_300ID_ZORBAX_ZED_TT_03Apr2014	1245.8	3747.42	3	31543	57	285.043	2.10948
VILFTMHNNR	CTRL2	D:\AmpK_Pass2\AmpKPass3\CTRL2	CTRL2_300ID_ZORBAX_ZED_TT_03Apr2014	1245.8	3747.42	3	31543	82	331.033	2.10648
VILFTMHNNR	CTRL2	D:\AmpK_Pass2\AmpKPass3\CTRL2	CTRL2_300ID_ZORBAX_ZED_TT_03Apr2014	1245.8	3747.42	3	31543	81	329.177	2.1002
VILFTMHNNR	CTRL2	D:\AmpK_Pass2\AmpKPass3\CTRL2	CTRL2_300ID_ZORBAX_ZED_TT_03Apr2014	1245.8	3747.42	3	31543	36	252.015	2.1
VILFTMHNNR	CTRL2	D:\AmpK_Pass2\AmpKPass3\CTRL2	CTRL2_300ID_ZORBAX_ZED_TT_03Apr2014	1245.8	3747.42	3	31543	22	215.012	2.09993
VILFTMHNNR	CTRL2	D:\AmpK_Pass2\AmpKPass3\CTRL2	CTRL2_300ID_ZORBAX_ZED_TT_03Apr2014	1245.8	3747.42	3	31543	30	238.277	2.09767
VILFTMHNNR	CTRL2	D:\AmpK_Pass2\AmpKPass3\CTRL2	CTRL2_300ID_ZORBAX_ZED_TT_03Apr2014	1245.8	3747.42	3	31543	25	226.963	2.0915
VILFTMHNNR	CTRL2	D:\AmpK_Pass2\AmpKPass3\CTRL2	CTRL2_300ID_ZORBAX_ZED_TT_03Apr2014	1245.8	3747.42	3	31543	75	323.3	2.00009
VILFTMHNNR	CTRL2	D:\AmpK_Pass2\AmpKPass3\CTRL2	CTRL2_300ID_ZORBAX_ZED_TT_03Apr2014	1245.8	3747.42	3	31543	41	257.38	1.99633
VILFTMHNNR	CTRL2	D:\AmpK_Pass2\AmpKPass3\CTRL2	CTRL2_300ID_ZORBAX_ZED_TT_03Apr2014	1245.8	3747.42	3	31543	125	541.643	1.98993
VILFTMHNNR	CTRL2	D:\AmpK_Pass2\AmpKPass3\CTRL2	CTRL2_300ID_ZORBAX_ZED_TT_03Apr2014	1245.8	3747.42	3	31543	34	249.195	1.98886
VILFTMHNNR	CTRL2	D:\AmpK_Pass2\AmpKPass3\CTRL2	CTRL2_300ID_ZORBAX_ZED_TT_03Apr2014	1245.8	3747.42	3	31543	40	255.984	1.92037
VILFTMHNNR	CTRL2	D:\AmpK_Pass2\AmpKPass3\CTRL2	CTRL2_300ID_ZORBAX_ZED_TT_03Apr2014	1245.8	3747.42	3	31543	17	206.151	1.89434
VILFTMHNNR	CTRL2	D:\AmpK_Pass2\AmpKPass3\CTRL2	CTRL2_300ID_ZORBAX_ZED_TT_03Apr2014	1245.8	3747.42	3	31543	52	275.319	1.89321
VILFTMHNNR	CTRL2	D:\AmpK_Pass2\AmpKPass3\CTRL2	CTRL2_300ID_ZORBAX_ZED_TT_03Apr2014	1245.8	3747.42	3	31543	135	705.197	1.88276
VILFTMHNNR	CTRL2	D:\AmpK_Pass2\AmpKPass3\CTRL2	CTRL2_300ID_ZORBAX_ZED_TT_03Apr2014	1245.8	3747.42	3	31543	46	268.268	1.87753
VILFTMHNNR	CTRL2	D:\AmpK_Pass2\AmpKPass3\CTRL2	CTRL2_300ID_ZORBAX_ZED_TT_03Apr2014	1245.8	3747.42	3	31543	129	589.632	1.87657
VILFTMHNNR	CTRL2	D:\AmpK_Pass2\AmpKPass3\CTRL2	CTRL2_300ID_ZORBAX_ZED_TT_03Apr2014	1245.8	3747.42	3	31543	87	338.213	1.77874
VILFTMHNNR	CTRL2	D:\AmpK_Pass2\AmpKPass3\CTRL2	CTRL2_300ID_ZORBAX_ZED_TT_03Apr2014	1245.8	3747.42	3	31543	105	378.27	1.77353
VILFTMHNNR	CTRL2	D:\AmpK_Pass2\AmpKPass3\CTRL2	CTRL2_300ID_ZORBAX_ZED_TT_03Apr2014	1245.8	3747.42	3	31543	31	243.115	1.77166
VILFTMHNNR	CTRL2	D:\AmpK_Pass2\AmpKPass3\CTRL2	CTRL2_300ID_ZORBAX_ZED_TT_03Apr2014	1245.8	3747.42	3	31543	90	344.594	1.69838
VILFTMHNNR	CTRL2	D:\AmpK_Pass2\AmpKPass3\CTRL2	CTRL2_300ID_ZORBAX_ZED_TT_03Apr2014	1245.8	3747.42	3	31543	14	195.037	1.67693
VILFTMHNNR	CTRL2	D:\AmpK_Pass2\AmpKPass3\CTRL2	CTRL2_300ID_ZORBAX_ZED_TT_03Apr2014	1245.8	3747.42	3	31543	73	319.189	1.66432
VILFTMHNNR	CTRL2	D:\AmpK_Pass2\AmpKPass3\CTRL2	CTRL2_300ID_ZORBAX_ZED_TT_03Apr2014	1245.8	3747.42	3	31543	39	255.301	1.66285
VILFTMHNNR	CTRL2	D:\AmpK_Pass2\AmpKPass3\CTRL2	CTRL2_300ID_ZORBAX_ZED_TT_03Apr2014	1245.8	3747.42	3	31543	53	276.087	1.56626
VILFTMHNNR	CTRL2	D:\AmpK_Pass2\AmpKPass3\CTRL2	CTRL2_300ID_ZORBAX_ZED_TT_03Apr2014	1245.8	3747.42	3	31543	115	401.13	1.56315
VILFTMHNNR	CTRL2	D:\AmpK_Pass2\AmpKPass3\CTRL2	CTRL2_300ID_ZORBAX_ZED_TT_03Apr2014	1245.8	3747.42	3	31543	27	233.011	1.55717
VILFTMHNNR	CTRL2	D:\AmpK_Pass2\AmpKPass3\CTRL2	CTRL2_300ID_ZORBAX_ZED_TT_03Apr2014	1245.8	3747.42	3	31543	6	159.261	1.55668
VILFTMHNNR	CTRL2	D:\AmpK_Pass2\AmpKPass3\CTRL2	CTRL2_300ID_ZORBAX_ZED_TT_03Apr2014	1245.8	3747.42	3	31543	4	145.277	1.55502
VILFTMHNNR	CTRL2	D:\AmpK_Pass2\AmpKPass3\CTRL2	CTRL2_300ID_ZORBAX_ZED_TT_03Apr2014	1245.8	3747.42	3	31543	9	184.958	1.55432
VILFTMHNNR	CTRL2	D:\AmpK_Pass2\AmpKPass3\CTRL2	CTRL2_300ID_ZORBAX_ZED_TT_03Apr2014	1245.8	3747.42	3	31543	59	292.466	1.46803
VILFTMHNNR	CTRL2	D:\AmpK_Pass2\AmpKPass3\CTRL2	CTRL2_300ID_ZORBAX_ZED_TT_03Apr2014	1245.8	3747.42	3	31543	106	379.882	1.44375
VILFTMHNNR	CTRL2	D:\AmpK_Pass2\AmpKPass3\CTRL2	CTRL2_300ID_ZORBAX_ZED_TT_03Apr2014	1245.8	3747.42	3	31543	19	207.793	1.35078
VILFTMHNNR	CTRL2	D:\AmpK_Pass2\AmpKPass3\CTRL2	CTRL2_300ID_ZORBAX_ZED_TT_03Apr2014	1245.8	3747.42	3	31543	122	482.402	1.33885
VILFTMHNNR	CTRL2	D:\AmpK_Pass2\AmpKPass3\CTRL2	CTRL2_300ID_ZORBAX_ZED_TT_03Apr2014	1245.8	3747.42	3	31543	77	325.284	1.33764
VILFTMHNNR	CTRL2	D:\AmpK_Pass2\AmpKPass3\CTRL2	CTRL2_300ID_ZORBAX_ZED_TT_03Apr2014	1245.8	3747.42	3	31543	10	188.067	1.33692
VILFTMHNNR	CTRL2	D:\AmpK_Pass2\AmpKPass3\CTRL2	CTRL2_300ID_ZORBAX_ZED_TT_03Apr2014	1245.8	3747.42	3	31543	55	281.294	1.23846
VILFTMHNNR	CTRL2	D:\AmpK_Pass2\AmpKPass3\CTRL2	CTRL2_300ID_ZORBAX_ZED_TT_03Apr2014	1245.8	3747.42	3	31543	123	483.148	1.23018
VILFTMHNNR	CTRL2	D:\AmpK_Pass2\AmpKPass3\CTRL2	CTRL2_300ID_ZORBAX_ZED_TT_03Apr2014	1245.8	3747.42	3	31543	72	318.243	1.22908
VILFTMHNNR	CTRL2	D:\AmpK_Pass2\AmpKPass3\CTRL2	CTRL2_300ID_ZORBAX_ZED_TT_03Apr2014	1245.8	3747.42	3	31543	15	197.966	1.22878
VILFTMHNNR	CTRL2	D:\AmpK_Pass2\AmpKPass3\CTRL2	CTRL2_300ID_ZORBAX_ZED_TT_03Apr2014	1245.8	3747.42	3	31543	66	306.454	1.22831
VILFTMHNNR	CTRL2	D:\AmpK_Pass2\AmpKPass3\CTRL2	CTRL2_300ID_ZORBAX_ZED_TT_03Apr2014	1245.8	3747.42	3	31543	60	293.492	1.13301
VILFTMHNNR	CTRL2	D:\AmpK_Pass2\AmpKPass3\CTRL2	CTRL2_300ID_ZORBAX_ZED_TT_03Apr2014	1245.8	3747.42	3	31543	71	316.989	1.13249
VILFTMHNNR	CTRL2	D:\AmpK_Pass2\AmpKPass3\CTRL2	CTRL2_300ID_ZORBAX_ZED_TT_03Apr2014	1245.8	3747.42	3	31543	132	643.016	1.13194
VILFTMHNNR	CTRL2	D:\AmpK_Pass2\AmpKPass3\CTRL2	CTRL2_300ID_ZORBAX_ZED_TT_03Apr2014	1245.8	3747.42	3	31543	38	254.041	1.12026
VILFTMHNNR	CTRL2	D:\AmpK_Pass2\AmpKPass3\CTRL2	CTRL2_300ID_ZORBAX_ZED_TT_03Apr2014	1245.8	3747.42	3	31543	35	251.287	1.01332
VILFTMHNNR	CTRL2	D:\AmpK_Pass2\AmpKPass3\CTRL2	CTRL2_300ID_ZORBAX_ZED_TT_03Apr2014	1245.8	3747.42	3	31543	49	271.031	1.01189
VILFTMHNNR	CTRL2	D:\AmpK_Pass2\AmpKPass3\CTRL2	CTRL2_300ID_ZORBAX_ZED_TT_03Apr2014	1245.8	3747.42	3	31543	64	302.316	1.01148
VILFTMHNNR	CTRL2	D:\AmpK_Pass2\AmpKPass3\CTRL2	CTRL2_300ID_ZORBAX_ZED_TT_03Apr2014	1245.8	3747.42	3	31543	12	192.093	0.905105
VILFTMHNNR	CTRL2	D:\AmpK_Pass2\AmpKPass3\CTRL2	CTRL2_300ID_ZORBAX_ZED_TT_03Apr2014	1245.8	3747.42	3	31543	68	309.291	0.904289
VILFTMHNNR	CTRL2	D:\AmpK_Pass2\AmpKPass3\CTRL2	CTRL2_300ID_ZORBAX_ZED_TT_03Apr2014	1245.8	3747.42	3	31543	88	339.218	0.899654
VILFTMHNNR	CTRL2	D:\AmpK_Pass2\AmpKPass3\CTRL2	CTRL2_300ID_ZORBAX_ZED_TT_03Apr2014	1245.8	3747.42	3	31543	84	333.381	0.80294
VILFTMHNNR	CTRL2	D:\AmpK_Pass2\AmpKPass3\CTRL2	CTRL2_300ID_ZORBAX_ZED_TT_03Apr2014	1245.8	3747.42	3	31543	119	407.927	0.776167

## Sheet: SQL Query to build PeakList
select B.PeptideSequence, C.TreatmentName,C.TreatmentPath,D.sampleName,B.PeptideMass,B.Peptideintensity ,b.PeptideCharge,B.PrecursorID,A.IOnNumber,A.IonMass,A.IonIntensity from IonTable A inner join RedundantProteinIdentificationTable B on A.PrecursorID=B.PrecursorID Inner Join TreatmentTable C ON C.Treatmentid =B.TreatmentID Inner Join SampleTable D on B.SampleID=D.Sampleid Inner Join FileTableV…
